# Supplementary material for: Factors contributing to variability of glycan microarray binding profiles
Source: Royal Society of Chemistry journal article supplement (doi:10.1039/c9fd00021f), 2019-01-01
Supplement: c9fd00021f2.zip [file c9fd00021f2.zip]

## Sheet: CFG full data
			ConA	ConA	ConA	ConA	ConA	ConA	WGA	WGA	WGA	WGA	WGA	WGA	SNA	SNA	SNA	SNA	SNA	SNA	MAL-I	MAL-I	MAL-I	HPA	HPA	HPA	HPA	PNA-EY	PNA-EY	PNA-EY	PNA-EY	RCA EY	RCA EY	RCA EY	SBA EY	SBA EY	SBA EY	SBA EY
			100	50	10	1	0.5	0.1	100	50	10	1	0.5	0.1	100	50	10	1	0.5	0.1	100 µg/ml	10 µg/ml	1 µg/ml	100ug/mL	10ug/mL	1ug/mL	0.1ug/mL	100ug/mL	10ug/mL	1ug/mL	0.1ug/mL	10ug/mL	1ug/mL	0.1ug/mL	100ug/mL	10ug/mL	1ug/mL	0.1ug/mL		21996
Chart Number	Abbreviation	Structure on Masterlist	Average RFU	Average RFU	Average RFU	Average RFU	Average RFU	Average RFU	Average RFU	Average RFU	Average RFU	Average RFU	Average RFU	Average RFU	Average RFU	Average RFU	Average RFU	Average RFU	Average RFU	Average RFU	Avg.	Avg.	Avg.	Avg.	Avg.	Avg.	Avg.	Average RFU	Average RFU	Average RFU	Average RFU	Average RFU	Average RFU	Average RFU	Average RFU	Average RFU	Average RFU	Average RFU
1	Gal-a	Gala-Sp8	425.473	-49.3648	53.3739	-0.91235	1.2382	14.1307	-10.4076	8.82512	15.4189	-2.79115	13.4813	15.9546	124.81	32.9638	1144.73	-5.553	0.071025	-16.3112	11.5205	7.45615	5.74745	8.9999	4.8275	14.1361	2.9663	-17.5519	-5.689	4.35117	0.114675	35.7801	14.2849	15.616	-11.0642	-21.511	-1.48885	-2.8502
2	Glc-a	Glca-Sp8	700.632	24.7509	186.026	4.9697	4.0788	4.0339	-7.86078	-6.61393	17.844	-2.02598	1.2386	29.3306	269.791	-87.5384	1749.74	61.5599	3.1882	-2.75718	3.57643	0.9018	18.1563	6.44652	13.1262	4.51692	7.80723	-19.38	-12.4938	-4.0369	-2.5256	46.4078	10.5302	18.0561	-23.2201	-21.1867	-0.659625	-6.81917
3	Man-a	Mana-Sp8	7148.5	66.9861	323.881	32.7202	20.2175	12.3609	-5.55218	5.24257	21.0652	0.46195	-4.77048	26.6627	247.577	-105.571	1416.66	11.9272	12.329	-9.46613	14.726	29.8659	39.5236	5.30538	14.7913	7.78837	7.57062	-28.9596	-8.6016	7.32398	2.4457	69.0137	33.1118	19.4388	-11.6585	-14.6715	16.5708	1.98828
4	GalNAc-a	GalNAca-Sp8	-32.7986	-42.3057	22.9047	-4.2305	-3.01028	3.2081	12.1634	21.9356	-3.03698	0.809925	-7.1571	5.49002	46.5631	-150.675	303.96	-1.2983	3.86078	-18.7768	1.55888	8.2536	4.99685	25857.1	19427.9	15288.4	2396.51	-15.2663	-16.0429	8.05022	-9.71288	9.89095	12.4124	8.17768	16712.8	1472.72	-6.95358	-21.2241
5	Tn(Ser)	GalNAca-Sp15	5.17047	62.7348	62.0166	-0.2373	0.631975	27.0857	-14.7259	-10.4232	5.49285	18.7668	0.7672	13.7301	-8.5196	-41.528	956.561	-1.55042	9.12695	-6.96593	5.70695	12.0358	15.3504	10533.1	11058.4	8251.63	2590.19	4.73985	-3.23612	0.86305	-7.68297	23.5789	40.6166	18.2641	103.271	-31.5174	0.838575	-24.5217
6	Fuc-a	Fuca-Sp8	161.217	-12.8071	15.7667	-7.71743	2.51993	3.32747	-25.9897	16.0926	-0.2041	-6.3975	4.56345	-5.16692	-32.0334	104.961	730.145	-1.60778	0.60185	-16.0553	-8.92145	-2.59592	-2.72438	1.10262	10.4456	4.98155	2.56923	-14.4573	-22.704	-5.7222	-11.7763	9.89632	19.5454	2.98055	-21.0011	-21.954	-7.07733	-12.2281
7	Fuc-a	Fuca-Sp9	-68.0517	-20.3921	32.7538	4.16147	-6.12335	5.82735	-19.7093	2.34045	-1.60155	1.2116	-0.626825	-2.61577	-81.6192	109.268	96.0791	-4.9501	-6.0656	-12.2565	-0.846175	6.8676	-1.35038	-1.37715	11.2922	5.05762	5.09147	-4.92652	-32.9131	-16.853	-25.1115	15.7189	10.3105	5.41265	-25.9924	21.2988	-14.9924	5.08328
8	Rha-a	Rhaa-Sp8	591.551	-22.1589	-10.5905	-4.72143	-11.7984	-0.969675	-0.30055	-14.5631	5.15787	-3.09552	-5.6629	24.8575	-61.6307	-76.5958	469.09	-3.45733	-7.87488	-16.073	7.30988	2.72395	1.05508	1.01188	9.72805	0.374225	10.0153	-15.2004	-20.5051	-2.42775	-9.70355	17.0265	6.47265	4.7472	-15.4207	-26.7345	-8.56807	-20.2902
9	Neu5Ac-a	Neu5Aca-Sp8	24.8745	-23.6116	-9.58027	0.40005	10.8988	-13.856	12.5262	-6.0699	-14.9751	-11.4487	-0.519025	-13.5311	396.762	22.7157	119.809	-9.0101	13.304	-19.5807	-2.35637	2.46435	3.23605	-2.43322	28.4593	7.42115	8.85015	-0.9502	-26.7512	-6.7086	-15.0881	6.17535	20.2026	15.234	-14.0515	-37.4851	-11.0967	-16.4267
10	Neu5Ac-a	Neu5Aca-Sp11	36.3337	-22.975	7.41643	-5.68393	-10.9251	-6.6287	-17.3994	-14.5531	-2.58132	-13.8754	-6.78685	-0.269625	-63.8752	-74.062	157.469	17.1807	6.33515	-17.1541	1.73477	-3.46213	3.8097	-4.54645	3.5313	3.09725	7.14587	-29.9171	-23.55	9.63387	-12.4942	5.1811	12.9196	24.9732	-3.20385	-41.5417	8.79737	-9.03345
11	Neu5Ac-b	Neu5Acb-Sp8	-107.269	31.6613	-9.92185	4.7865	11.0499	-2.01615	1.95157	2.7707	6.15797	2.00845	-1.74602	10.0894	-199.685	-21.6008	378.767	-20.5479	-1.09987	-7.07355	1.48615	-0.561	13.4133	-3.93305	6.4591	8.28163	9.1528	-16.856	-27.6112	-3.31692	-36.2404	18.9665	11.0349	11.9403	-15.7878	-80.7628	-10.7666	-9.28747
12	Gal-b	Galb-Sp8	120.365	-11.7218	47.2901	-0.98265	5.6103	1.5861	-20.288	-0.467075	15.9008	0.575825	0.4442	14.8296	122.323	321.125	419.255	4.92355	-5.68352	3.90222	110.476	34.0461	28.1369	-0.637525	8.9318	19.7185	15.6625	-3.63805	-24.0325	-2.36977	2.06525	1966.96	238.945	66.0851	-13.4373	-28.0098	20.1055	-3.06995
13	Glc-b	Glcb-Sp8	-53.2088	-12.7176	73.1794	7.96818	3.47862	18.7445	7.68695	7.3072	17.827	-4.73228	-0.929325	17.8849	177.628	-66.3685	122.516	29.5268	-2.8761	6.07673	33.3462	16.1101	11.3509	3.214	16.9533	15.6155	9.05682	-13.3666	3.45252	-3.49773	-5.47698	9.38127	16.8123	10.6253	-19.8652	-10.2222	-2.01822	-7.62238
14	Man-b	Manb-Sp8	-5.0544	-6.43515	167.778	2.93548	11.0533	13.3043	5.6765	-5.07615	4.78937	2.64505	-5.00618	3.66165	132.952	682.76	91.7475	5.30377	-4.20563	-4.1685	24.1005	32.844	8.5072	5.59238	11.93	17.6278	21.3307	-26.3766	-13.6505	-4.69925	-18.5707	7.08167	8.0486	18.4533	-21.9275	1.04818	-5.82367	1.12958
15	GalNAc-b	GalNAcb-Sp8	195.325	-6.17555	38.726	-5.39965	-1.48888	12.9516	8.21567	3.50178	29.1621	6.49913	-1.94795	22.086	87.1717	-187.613	98.4421	-3.11692	2.5805	-11.8288	-7.91585	15.1525	7.28185	751.088	118.851	35.8362	17.4481	22.0552	-14.718	-2.10585	1.3305	19.5079	13.3492	32.3339	5072.01	187.123	11.3568	-17.7865
16	GlcNAc-b	GlcNAcb-Sp0	-36.2673	-10.6267	61.3504	20.2711	10.3092	14.7662	-11.6694	2.65252	23.1613	0.887	8.4384	0.533925	0.5299	10.3213	17.973	7.1018	2.77735	0.41915	12.8576	-1.60112	0.379425	1.42193	11.1568	4.99597	8.4962	-0.02445	-8.44573	2.6969	-8.74515	6.10865	25.2608	40.8719	-25.9346	-31.4171	24.677	3.14898
17	GlcNAc-b	GlcNAcb-Sp8	-15.5476	-30.8243	35.3614	4.5029	-1.02147	7.9372	-13.3707	19.3093	13.2411	-6.93395	6.9046	-5.70523	-7.73537	-89.4472	154.216	-4.57088	7.39695	-1.54427	4.9654	21.6412	7.12785	1.27287	18.1235	8.06835	8.45532	-24.3877	-18.6429	12.5793	-1.29713	43.7679	4.08895	7.881	-22.7859	-24.4308	-6.16765	-27.9816
18	GlcNGc-b	GlcN(Gc)b-Sp8	-17.977	-11.3452	51.6275	-5.1702	8.31217	8.8664	-18.382	-12.5572	13.4186	-0.8981	11.8394	-0.043675	-58.1206	17.1119	192.565	1.53153	3.6606	-15.7675	-6.22427	13.0723	11.8333	2.86867	13.1526	5.61015	6.98445	-21.3047	-2.42822	9.21113	-5.16965	10.2998	29.6558	13.0648	-25.8161	-27.2228	-28.8204	-0.488475
19	LNnH-like	Galb1-4GlcNAcb1-6(Galb1-4GlcNAcb1-3)GalNAca-Sp8	-21.3617	94.3709	5.97642	2.65752	9.54185	4.3314	-8.49875	-8.13755	-6.7703	0.588475	-0.710225	18.865	-41.3593	-69.6954	63.5018	-8.5655	3.98013	-7.68653	27.3933	-1.5906	11.8557	2.85873	8.9349	6.4824	11.6316	-2.1636	-23.5177	11.6847	-13.9719	38432	36887.3	6331.66	-5.98465	-1.0575	-10.6653	-16.7043
20	LNnH-like	Galb1-4GlcNAcb1-6(Galb1-4GlcNAcb1-3)GalNAc-Sp14	-15.9753	-4.2911	20.6726	4.8352	12.9825	3.69913	-18.7958	-8.54863	2.72527	12.0945	-5.0547	8.25162	-88.7013	156.402	206.155	-1.31983	11.8251	-18.0984	6.62975	15.2303	24.8972	-1.55455	2.28992	1.97985	6.76288	-19.5963	-25.7012	-0.450725	-20.7234	8425.39	4120.12	1480.91	-27.8277	-5.77937	-11.353	8.17325
21		GlcNAcb1-6(GlcNAcb1-4)(GlcNAcb1-3)GlcNAc-Sp8	-32.9401	-3.68348	12.99	1.82975	-2.06168	5.2017	-13.3575	-4.29635	3.1662	4.17635	6.85098	-5.73145	-46.235	-42.8542	205.09	-2.83253	-9.28135	-13.6442	0.221075	13.1343	11.0059	-7.9139	7.73587	9.45338	1.43207	-2.48658	-17.3325	-10.4825	-12.8488	4.16922	9.1605	7.34695	-16.1138	-11.2767	-14.5005	-17.6454
22	LacNAc(3'6'6tri-su-)	6S(3S)Galb1-4(6S)GlcNAcb-Sp0	1.72212	-33.8184	111.783	2.18325	-1.59275	-15.6207	-20.23	-5.89653	2.4986	-6.411	16.4134	-3.00922	448.738	770.568	505.681	-17.0531	-4.37117	-21.921	2989.8	1318.98	148.829	-3.08193	7.07125	8.42188	3.92603	-43.1224	-6.37452	-8.97057	-13.0046	7.1603	13.9908	3.05687	-28.0329	-35.3939	-15.158	-18.4604
23	LacNAc(3'6'di-su-)	6S(3S)Galb1-4GlcNAcb-Sp0	-47.5228	-14.3382	42.3016	-3.45985	-2.99187	-9.2838	-13.6137	-6.28225	-6.94853	-1.4806	0.146725	-9.59628	-55.039	174.369	314.768	-9.24253	-11.7852	-12.729	1.28295	-12.8982	-0.3712	-3.2723	12.4745	5.9546	2.50365	-8.10508	-21.5075	-6.74058	-4.56438	1.13893	11.0565	0.96845	-14.2359	-16.322	-9.81428	-10.3425
24	FL(3'6diSu-)	(3S)Galb1-4(Fuca1-3)(6S)Glc-Sp0	130.445	32.0985	16.0878	31.5166	17.0523	27.6197	17.8136	25.9356	61.6984	22.4377	0.94365	51.9761	-8.54765	302.048	348.407	30.036	43.4509	-6.82005	1770.17	759.493	467.359	14.066	28.9133	27.0638	32.7426	-14.2443	2.2787	4.1723	-2.5806	15.8962	20.7768	23.2509	-33.1703	-0.796825	2.08847	-6.5338
25	Lac(3'su-)	(3S)Galb1-4Glcb-Sp8	264.204	-31.1887	138.256	1.92052	1.65575	4.3219	6.00073	4.83443	3.94175	14.9968	19.7984	0.883675	20.9719	-47.2241	1373.35	7.5605	4.14003	-26.4762	15800.8	10002.4	2568.22	-0.66595	17.0165	12.0523	4.1305	290.554	-0.61665	-1.66615	-1.595	25.6455	5.77743	3.8284	-8.82418	-14.4967	-0.491175	-14.9877
26	Lac(3’6DiSu-)	(3S)Galb1-4(6S)Glcb-Sp0	105.606	0.447675	82.5298	8.47573	6.6236	2.03737	3.88485	18.435	-3.39818	1.23657	19.48	2.12855	20.846	-77.4783	1882.21	7.04108	7.57967	1.63545	15487.2	9845.58	3918.93	2.64745	11.1317	14.3771	3.68443	454.605	48.9895	-0.8903	-6.6396	9.8291	6.02785	4.8715	-13.4398	-14.7625	-3.10812	-10.8322
27	Lac(3’3DiSu)	(3S)Galb1-4(6S)Glcb-Sp8	71.4464	9.56303	27.3899	6.93507	-0.9432	-7.5464	1.06058	13.1488	-2.95015	6.54945	18.5031	0.221975	-35.9717	21.6697	1347.11	-2.273	-1.46345	-15.9608	18063.6	12484.7	4816.88	-1.38235	10.6883	9.7876	17.8726	755.961	107.239	-0.54405	-17.1021	27.1863	5.94958	1.54783	-0.27405	-40.1828	2.43225	-14.7067
28	LeA(3'su)	(3S)Galb1-3(Fuca1-4)GlcNAcb-Sp8	100.715	-3.64513	21.4495	3.33882	-4.56557	1.0545	-3.76595	-0.5364	20.3439	9.30075	2.99465	10.9181	106.43	-95.8707	145.318	2.19643	-4.73203	-12.4001	1.61975	-7.18275	0.0436	2.91298	10.205	19.4469	0.45595	-10.6128	-14.91	5.62763	-1.95262	9.82392	17.7173	12.0928	-26.2767	-24.9329	-0.060075	-15.4621
29	TF(3’su)	(3S)Galb1-3GalNAca-Sp8	-16.3065	-35.9674	113.156	-1.90842	-2.20298	-2.24202	64.3903	2.96745	5.14508	1.26097	0.3519	4.49353	22.9097	157.316	252.407	-5.09357	1.27643	-14.9431	3498.03	430.428	-10.2518	304.851	56.3654	23.157	8.99162	-12.0466	-0.451375	7.26278	-2.3511	24.0736	9.6806	12.7494	-22.0736	-27.7472	2.9923	-15.6625
30	LeC(3’su)	(3S)Galb1-3GlcNAcb-Sp0	-45.8352	-43.0831	-1.35747	-9.25567	-9.93697	13.9785	-24.9636	3.18892	-3.32628	-0.9474	-1.88018	10.1326	15.9059	68.3059	33.0561	-1.80817	28.5952	-19.5611	9785.75	4516.8	743.284	1.9966	11.2994	10.8545	11.3745	-6.0702	-22.9684	1.3111	-15.8158	8.37105	14.0995	12.2043	-20.2272	-21.548	0.2523	-11.258
31	LeC(3’su)	(3S)Galb1-3GlcNAcb-Sp8	-58.4171	-12.6072	-7.87333	-2.03593	8.46317	4.0098	-32.5886	-18.8068	-1.7859	-1.48065	1.93762	-5.816	-95.7895	-18.448	215.618	-8.4704	0.698475	-16.5898	10866.6	3974.94	814.655	-3.15118	13.2278	9.75375	-2.40717	3.01398	-21.2574	-10.6894	-15.984	14.1924	1.88447	4.96647	-21.1609	-9.16947	-2.67475	14.3434
32	3'-sulpho-LeX	(3S)Galb1-4(Fuca1-3)GlcNAc-Sp0	-10.8495	-27.4942	18.219	6.21947	-1.50222	2.61153	6.70012	5.56353	-6.35787	-1.05197	10.5442	12.2954	-46.4755	-23.4459	278.451	1.4687	4.21573	-5.89818	11.7694	5.0247	5.35328	5.4429	11.7896	26.2431	17.8839	-18.2758	-20.3431	2.68063	-7.7486	38.6169	21.8176	30.4786	-6.2329	-9.41327	-7.50705	-5.54942
33	3'-sulpho-LeX	(3S)Galb1-4(Fuca1-3)GlcNAc-Sp8	-26.9436	28.8116	-13.0536	-7.5524	3.4461	-1.03493	4.78282	2.5419	-9.4561	2.27607	17.4098	6.50955	336.096	-7.94053	188.105	-4.54865	-6.24815	-8.48795	73.1049	6.46298	0.030975	-1.21715	6.67245	9.23972	6.548	5.5746	-26.6527	2.3006	-27.5208	20.1808	6.47035	15.8955	-4.35358	-39.568	3.2493	-12.5347
34	LacNAc(3’6DiSu)	(3S)Galb1-4(6S)GlcNAcb-Sp0	105.442	-42.7267	133.49	-2.93633	-6.3799	-2.691	-12.0665	-3.62695	-4.2856	-6.43555	-1.3034	6.44913	-25.9678	-3.81033	445.903	1.977	6.18813	-7.35025	17496.5	9808.77	3089.01	-3.3389	16.9645	14.1032	7.3433	1263.92	253.019	-0.404225	-23.2633	71.5961	8.62808	11.7632	20.3025	-25.4337	7.68873	-8.06275
35	LacNAc(3’6DiSu)	(3S)Galb1-4(6S)GlcNAcb-Sp8	-43.7227	115.429	-10.1671	6.9763	-1.2191	-6.50755	7.8292	1.60355	-1.2773	1.73968	-1.03463	-7.30368	-137.468	61.9156	1241.87	-25.7986	1.4008	-9.11725	20383.2	10529.5	3740.42	-2.36702	9.21102	4.27042	7.92292	1549.45	302.245	-0.8487	-37.7595	23.0926	13.6449	1.55105	-12.0758	-57.6129	-9.58563	-17.4261
36	LacNAc(3'Su)	(3S)Galb1-4GlcNAcb-Sp0	-69.7088	4.26738	24.6049	16.4263	-3.68722	-7.6847	-15.025	8.81612	-12.9423	-1.04228	-6.80477	-1.84702	-48.9284	543.607	153.61	4.71762	15.3975	1.03955	18775.8	8391.2	2354.36	0.782675	12.2859	15.9881	0.809575	855.567	77.7277	-3.61053	-17.0718	17.9681	5.12687	13.4463	-10.1661	-34.936	4.5256	-14.5467
37	LacNAc(3'Su)	(3S)Galb1-4GlcNAcb-Sp8	-35.4859	2.06792	52.9969	-0.2031	-7.39842	10.176	0.42395	-2.5875	6.51785	-2.66325	1.04702	-1.27822	55.3084	-28.9024	74.6499	0.418325	4.4453	-10.1649	15930.4	9320.09	2903.15	1.50037	5.38222	13.1036	4.3744	1124.38	283.023	4.44017	-14.415	28.008	6.72795	7.54515	-18.1172	-1.49215	-3.91713	-19.1079
38	Galb(3Su)	(3S)Galb-Sp8	-3.68133	-7.39317	119.481	-2.02545	9.76397	5.05615	4.92203	-1.6888	-0.86675	3.58208	10.7843	7.57405	67.7922	211.609	-4.86937	1.60438	-5.8685	-4.65405	5765.64	2573.51	438.385	1.028	16.8509	10.3491	12.8064	-28.3998	-16.9662	-9.6973	-12.0549	4.9025	2.41125	10.1218	-16.4875	-4.79843	-0.764425	-0.174625
39	LacNac(4'6'diSu)	(6S)(4S)Galb1-4GlcNAcb-Sp0	174.727	-9.08655	234.408	10.7399	4.13415	1.01237	-12.5184	-11.2727	-1.771	1.0536	-6.98605	3.96805	-28.98	-74.7784	209.648	-1.66293	7.42157	-2.53578	-11.1599	-10.1148	-8.8047	-2.32555	8.34883	9.3392	6.63523	21.2241	-1.6013	10.736	2.55805	2.91493	0.4363	4.58625	-23.1052	-23.6361	8.27127	-21.2796
40	LacNAc(4'Su)	(4S)Galb1-4GlcNAcb-Sp8	-31.2749	39.4384	43.0437	-1.53645	-2.41352	1.78575	-16.9603	-8.47518	-3.8127	-5.61618	-9.65115	6.39835	-9.2216	-2.66977	-6.16882	-4.74788	1.56728	-12.617	988.531	527.176	114.028	-2.49657	8.56522	6.80255	8.9423	9.34605	-30.2616	-6.85225	-8.71325	10.2118	46.5331	5.84735	-19.4658	-10.5828	6.40688	-15.3607
41	Man(6P)	(6P)Mana-Sp8	-27.0421	-8.68177	119.085	19.7037	-7.73615	23.8003	-17.6763	-4.8257	14.482	-1.33843	2.33837	13.1635	85.3545	-79.0817	1043.2	6.5154	-0.204225	6.9016	-3.67223	5.86235	33.4064	5.62398	15.3482	16.8226	20.5921	-18.2372	-8.71813	6.5564	-0.41655	14.0297	20.8824	17.3519	-4.2278	-3.12335	6.87777	-4.75935
42	Lac(6'Su)	(6S)Galb1-4Glcb-Sp0	-19.8913	32.9981	30.0995	2.01298	6.65525	10.423	-10.9679	-2.3263	11.7716	-1.45028	6.59477	2.49735	5051.26	4831.38	39.898	4.38063	9.91713	-13.534	-5.6319	9.98725	25.519	2.71918	9.87462	13.5526	13.0069	-5.15658	-7.14335	-3.68275	-0.78565	19393.2	4109.85	1073.88	-24.0739	-11.4627	-7.95662	-7.6931
43	Lac(6'Su)	(6S)Galb1-4Glcb-Sp8	-7.28137	6.70927	38.7032	3.1899	1.14113	1.9129	-2.15318	6.7426	2.63983	-2.92338	2.62982	18.2873	3717.01	1074.8	256.79	5.25797	1.5986	-7.15705	3.62777	15.1958	2.7857	8.88015	7.06313	10.9977	0.56275	-9.42947	-9.19673	-2.53235	-10.1504	22159	5479.59	507.524	-9.35455	-18.8802	-0.6571	-4.6828
44	LacNAc(6'Su)	(6S)Galb1-4GlcNAcb-Sp8	-14.2008	-32.0762	27.695	-1.6492	4.812	4.47528	-20.6836	-8.77317	5.27378	2.80503	-10.3488	8.05555	24875.5	17582.6	121.602	-4.41012	-3.10308	-15.762	2370.07	1102.06	202.794	0.8359	14.0717	2.57145	8.42765	-11.7353	-19.724	-9.59538	-18.5701	23226.3	14600.6	3140.49	-19.9244	-26.4556	-13.0268	-18.3947
45	Lac(6’6Di-Su)	(6S)Galb1-4(6S)Glcb-Sp8	348.267	6.03688	67.1459	13.9595	7.57942	5.1642	-12.4303	-1.61035	-2.15685	-2.04875	-1.7942	21.9629	22843.4	18910.7	1364.74	12.0383	22.3316	-6.94023	-16.3943	12.3565	21.298	0.792575	9.6977	13.9619	4.77205	0.816875	-14.2311	8.42213	-8.9808	8352.13	944.811	131.133	-8.99162	-18.2225	-3.33203	-11.1472
46	3'SLacNAc(6'Su)	Neu5Aca2-3(6S)Galb1-4GlcNAcb-Sp8	-10.3523	22.0519	3.81267	-5.09875	-2.8816	-3.00685	-17.6276	13.1704	6.10785	-4.60192	17.7275	1.46135	-136.978	479.169	120.347	0.361375	18.6233	-6.14125	11.3176	-1.83315	19.2765	-0.38585	13.1892	11.3707	8.49223	-37.9964	-11.7233	-4.14853	0.32335	10.7129	-1.71678	2.62085	-26.0546	-44.2075	-3.54525	-22.3591
47	GlcNAcb(6Su)	(6S)GlcNAcb-Sp8	-23.0371	-20.9455	33.9913	4.4805	-2.2611	2.4384	0.8359	-14.1793	-12.7219	-0.912175	11.9674	-2.52497	-133.337	138.303	502.156	-0.1975	-0.704725	-11.363	-40.736	-4.71718	11.6975	-1.35	11.5855	12.825	10.3959	-3.17853	-7.1041	-0.433875	-5.10107	202.44	3.09622	1.3693	-16.6248	-13.3705	4.33453	1.91607
48		Neu5,9Ac2a-Sp8	9.97167	-35.7866	-5.1486	-3.72895	3.68887	-2.75955	6.95443	-6.48645	-5.106	10.6073	-0.886075	0.485	-55.7861	116.141	-6.52913	-5.18045	-6.49208	-13.5517	-20.7714	-18.6009	-13.9851	0.61415	8.8574	16.797	16.6034	-7.50097	-23.3576	-10.399	-12.7975	10.7237	6.97235	8.9151	-27.1375	-36.1478	0.498325	-20.7724
49		Neu5,9Ac2a2-6Galb1-4GlcNAcb-Sp8	-21.1426	-37.5765	32.4275	-2.8562	-2.66613	-9.44253	-2.28907	-4.97883	-6.02228	1.64935	9.76087	-10.363	39795.3	49009.1	43136.8	10625.9	6501.01	4121.74	-4.88803	-7.70765	-2.9317	0.3773	8.731	5.52233	2.56128	-10.9414	5.3163	0.238125	9.12225	9.58575	3.4229	0.025425	-6.67737	-18.2562	2.31022	-14.7264
50	Man3	Mana1-6(Mana1-3)Manb1-4GlcNAcb1-4GlcNAcb-Sp12	35274.9	31853.2	38005.3	5073.08	510.209	281.146	4.11805	3.14252	21.5975	6.6575	0.930175	10.8637	20.8746	-73.3332	195.203	8.91237	3.53952	2.64728	4.36555	6.40795	-5.78657	2.69358	20.9344	19.0454	20.234	-4.32127	-0.953325	0.96485	3.75435	21.1616	17.2929	26.3423	28.1263	-1.4977	-0.395825	1.12598
51	Man3	Mana1-6(Mana1-3)Manb1-4GlcNAcb1-4GlcNAcb-Sp13	42504.8	30536.1	36419.1	11399.9	5813.81	553.191	31.2638	-4.79893	10.0839	8.71775	14.1199	4.84507	41.2386	-101.996	734.122	-5.61985	14.8505	-9.0003	11.8767	-3.9929	2.01273	3.7995	18.2878	33.5436	15.2776	-13.1017	-1.41478	1.28865	-4.61413	14.5328	32.6052	11.3999	245.712	-18.5978	1.8099	-7.292
52	NGA2	GlcNAcb1-2Mana1-6(GlcNAcb1-2Mana1-3)Manb1-4GlcNAcb1-4GlcNAcb-Sp12	33083.8	41515.3	13193.5	997.293	918.418	99.0204	-7.80965	-9.25132	0.3745	-1.61688	2.71663	15.2866	25.8079	-90.0056	120.482	-4.05195	3.53367	-11.1977	14.3778	-0.486825	4.70432	2.24287	4.4739	2.30583	12.7213	-8.70655	-0.198	0.0808	-4.1428	5.35557	21.0107	7.4759	13.236	-13.9607	0.92565	-3.76833
53	NGA2	GlcNAcb1-2Mana1-6(GlcNAcb1-2Mana1-3)Manb1-4GlcNAcb1-4GlcNAcb-Sp13	42923.2	39765.1	22475.3	2486.05	1518.52	149.171	-9.96207	2.65898	-16.9854	-1.42382	10.2071	5.67783	-97.3151	-5.7695	349.569	-5.01708	2.77055	-14.2321	3.57242	-1.526	1.14785	-1.81663	3.0142	3.83192	5.5526	4.0196	0.1626	15.3309	2.21955	48.7524	24.3274	13.6614	128.431	-22.1486	-15.0054	-6.35645
54	NA2	Galb1-4GlcNAcb1-2Mana1-6(Galb1-4GlcNAcb1-2Mana1-3)Manb1-4GlcNAcb1-4GlcNAcb-Sp12	38159.7	37472.7	8060.56	186.628	65.7636	14.8682	-11.754	10.3077	1.19805	0.448475	5.95805	13.0209	-18.4196	28.4918	107.072	0.3237	-8.06417	-17.8419	-3.03595	3.85963	-1.89433	-3.788	8.65935	8.68528	5.84667	-13.3783	-25.1522	2.6883	-11.0983	37523.8	37674.3	5941.87	-12.3197	-12.0773	-1.61595	-11.6765
55	A2-(a2-6)-sp12	Neu5Aca2-6Galb1-4GlcNAcb1-2Mana1-6(Neu5Aca2-6Galb1-4GlcNAcb1-2Mana1-3)Manb1-4GlcNAcb1-4GlcNAcb-Sp12	61880.1	41415.7	3089.26	20.2366	20.5896	-1.4583	-0.805	-3.58777	-1.86925	-2.45323	0.440425	4.483	40488.3	32384.9	39908.6	9373.25	5601.16	4066.21	-10.6897	2.8271	6.5265	-1.74652	1.4676	3.10233	7.6881	-12.0807	-17.3415	5.51582	-6.55343	6388.15	663.261	20.4021	-12.9934	-25.2771	-6.8122	-6.39138
56	A2-(a2-6)-sp13	Neu5Aca2-6Galb1-4GlcNAcb1-2Mana1-6(Neu5Aca2-6Galb1-4GlcNAcb1-2Mana1-3)Manb1-4GlcNAcb1-4GlcNAcb-Sp13	52132.5	32867.1	4942.1	108.522	3.00995	-1.80288	-16.0895	-2.36735	-7.1793	-9.36825	1.77102	-3.33483	27556.5	50309.8	38386.2	20132.2	9920.34	9757.73	-11.1719	1.32563	8.1133	3.18	10.1974	9.46835	11.3149	-3.88213	-11.5532	-4.10157	-9.74995	12682.9	1020.2	154.236	-7.65273	-34.564	-2.752	-30.8043
57	A2-(a2-6)-sp21	Neu5Aca2-6Galb1-4GlcNAcb1-2Mana1-6(Neu5Aca2-6Galb1-4GlcNAcb1-2Man-a1-3)Manb1-4GlcNAcb1-4GlcNAcb-Sp21	38424.5	38630.9	4795.33	100.894	50.526	10.6847	31.5761	10.1898	8.16377	6.01892	2.18648	21.158	38592.4	41867.2	40522.8	11888.8	7911.5	4553.59	5.51248	11.7835	9.43153	1.8685	7.81858	19.7003	6.7868	-8.66823	3.38965	0.479975	-1.11648	38458.6	15630.1	1525.98	4.9847	-26.5503	8.93552	2.12295
58	A2-(a2-6)-sp24	Neu5Aca2-6Galb1-4GlcNAcb1-2Mana1-6(Neu5Aca2-6Galb1-4GlcNAcb1-2Mana1-3)Manb1-4GlcNAcb1-4GlcNAcb-Sp24	43022.2	21011.7	3313	64.81	45.4477	6.93995	5.29595	17.3909	-5.01168	4.22283	-0.364825	9.64217	41286.2	38099.6	41260.7	8580.62	6204.39	5590.28	5.09282	16.7063	11.1681	2.06913	10.3874	29.5208	10.7042	-2.7415	9.94888	-1.504	3.41552	1116.6	121.811	35.9684	-4.5408	-6.51628	3.69965	5.03392
59	BG-H4	Fuca1-2Galb1-3GalNAcb1-3Gala-Sp9	-174.112	97.731	44.903	8.50865	5.38685	1.60352	-25.2504	9.90718	12.2001	2.46445	8.91305	25.0201	-328.028	808.561	1025.81	1.36792	5.00413	-0.31585	30.3907	35.5574	65.7631	2.50948	12.996	7.92495	15.0305	4.55755	-23.6227	-1.2951	-9.60492	36.2245	37.4023	21.0948	-0.6332	-21.4838	10.9328	6.76255
60	Globo H	Fuca1-2Galb1-3GalNAcb1-3Gala1-4Galb1-4Glcb-Sp9	-3.91048	-43.0553	26.4401	14.5284	-10.7578	5.45833	-9.56303	-6.7899	0.35705	-3.1678	3.31537	3.20368	1010.01	1997.54	122.163	-13.8918	-4.5123	1.97235	58.4517	40.2404	48.1658	-0.829225	6.56957	4.87365	15.8782	-11.9677	-20.0601	4.79667	-12.5463	6.40917	4.05637	2.1778	-10.4315	-11.3491	10.1026	6.20165
61	LeB	Fuca1-2Galb1-3(Fuca1-4)GlcNAcb-Sp8	-6.5227	-9.48252	12.7173	1.40973	-2.44627	3.92897	3.29948	0.852175	4.00418	-1.86518	-1.28	9.10392	-8.57665	-84.865	24.0077	-0.4468	1.34495	-12.1407	-8.02848	-5.1344	-1.10253	6.08677	3.03173	5.92987	6.84802	-4.33265	-13.1659	-2.96205	-8.51238	12.9228	6.16618	6.81867	-18.246	-9.7168	-0.885075	6.50145
62	BG-H3	Fuca1-2Galb1-3GalNAca-Sp8	-10.7182	-6.31023	-0.92905	1.0733	2.71005	-8.18645	-3.7304	1.31897	0.175225	11.0649	7.28615	-0.061575	770.147	535.629	92.7449	6.62275	0.679275	-0.751475	1.0938	-3.23963	-9.3446	-3.95493	17.5348	3.21695	8.72273	-24.566	-15.7029	-3.29	-10.3845	0.446075	2.91925	5.40218	-16.229	-16.0466	-4.69917	-3.8009
63	BG-H3	Fuca1-2Galb1-3GalNAca-Sp14	602.697	326.398	94.7083	9.67887	0.859975	10.6321	-7.41108	12.7024	7.783	4.5126	0.547725	4.01317	7037.58	15069.2	539.805	20.6422	4.2772	1.79022	0.941025	15.0161	-0.0905	-0.5788	8.28905	2.38223	5.02025	2.32552	-8.1547	-0.56055	-8.59853	9.7632	10.4944	10.5255	-27.4191	-6.49195	-1.7248	-5.3504
64	Fuc-GM1a	Fuca1-2Galb1-3GalNAcb1-4(Neu5Aca2-3)Galb1-4Glcb-Sp0	167.118	69.7253	34.2465	9.67647	5.91133	3.43665	-9.2103	-2.3083	13.9881	-0.488	-2.17805	4.59527	1428.02	3322.12	12.0449	4.50185	3.077	-13.7819	4.8563	-5.3131	-12.9219	-3.17782	4.76607	7.9689	7.56678	-8.31528	-18.8552	1.5657	0.0821	12.6838	13.2923	14.3897	-16.7052	-22.1352	2.67832	-18.9829
65	Fuc-GM1a	Fuca1-2Galb1-3GalNAcb1-4(Neu5Aca2-3)Galb1-4Glcb-Sp9	-31.1116	37.6798	15.428	0.138375	-1.58967	-3.23415	-5.31907	-12.6048	-3.60268	0.29685	0.2805	2.82408	2389.91	2022.92	56.9341	2.35293	-0.21425	-17.0478	13.5839	-0.97005	0.7293	-2.15103	15.0695	15.0461	11.0902	-22.054	-9.51842	-0.24255	-2.88233	16.7038	7.36615	7.3192	-18.6169	-34.5126	4.67595	-16.5147
66	BG-H1	Fuca1-2Galb1-3GlcNAcb1-3Galb1-4Glcb-Sp8	43.1978	-8.86913	287.53	10.0902	7.23102	3.95955	-8.7952	-16.8083	5.8645	-3.84492	4.37997	-0.262575	-35.6817	43.6616	77.5339	-2.15153	0.616175	-12.9988	10.9258	21.2679	17.3592	-3.1527	1.94318	5.57265	12.5092	-15.8557	-19.2335	-11.2527	0.874225	12.0535	5.6066	7.51065	-24.5581	-11.4655	-3.2487	-6.79868
67	BG-H1	Fuca1-2Galb1-3GlcNAcb1-3Galb1-4Glcb-Sp10	24.2793	27.6742	37.1755	-6.67487	-1.20133	-2.70883	-8.382	5.56653	0.05575	1.61938	-11.3018	-7.46747	-79.3656	-89.1398	96.8358	-6.5922	-9.04197	-13.4419	4.75907	13.2922	19.6388	1.11817	9.58855	6.58612	5.5559	-17.9065	-4.75512	-5.79563	-0.3752	40.0325	7.24765	16.1786	-13.4999	-30.0157	-6.80553	-22.196
68	BG-H1	Fuca1-2Galb1-3GlcNAcb-Sp0	34.7097	-28.4837	8.88085	7.05858	1.90523	0.137925	-12.368	-8.25375	-4.87145	-2.12032	-4.3099	0.331075	-145.954	95.3254	667.204	-5.5501	-5.53257	-15.1217	5.39568	-0.573475	7.3049	-1.76153	5.56487	5.4337	3.7419	-25.9834	-24.8863	-1.7689	-8.01118	24.4312	16.0916	2.76158	-39.175	-52.0485	-1.65705	-19.5987
69	BG-H1	Fuca1-2Galb1-3GlcNAcb-Sp8	-42.621	-27.9269	20.8829	7.02595	-6.5916	-3.53555	-4.06348	-3.82265	0.356225	-5.11595	0.9507	19.9095	-75.5383	248.779	135.189	2.74237	5.75277	-13.2068	-9.68342	2.15375	42.3671	1.26593	7.4916	0.580225	11.1965	-1.70517	-20.0379	0.132875	-7.31925	21.8241	3.6742	2.85515	-11.256	-28.2563	-6.13462	-8.37253
70	LeY-LeX	Fuca1-2Galb1-4(Fuca1-3)GlcNAcb1-3Galb1-4(Fuca1-3)GlcNAcb-Sp0	61.8835	-27.141	6.37395	4.63713	3.62117	2.4222	-21.9195	-1.2079	-1.07382	-2.1175	2.68893	1.45347	-138.006	1.02005	40.6801	9.28215	-1.94673	-15.5718	87.8905	10.5339	81.7402	-3.30073	3.42617	8.3645	-0.08285	-38.942	-8.36733	-7.85498	-7.17567	-1.8292	4.5748	-0.2892	-25.5884	-33.159	-6.78728	-15.2734
71	LeY-LeX-LeX	Fuca1-2Galb1-4(Fuca1-3)GlcNAcb1-3Galb1-4(Fuca1-3)GlcNAcb1-3Galb1-4(Fuca1-3)GlcNAcb-Sp0	311.921	412.691	109.919	14.5309	16.7437	21.8464	-3.50178	-0.775925	26.814	-8.52372	2.21107	19.3781	1252.04	16589.2	143.308	-0.726425	-9.40495	-5.7121	133.484	41.0443	110.663	5.3143	35.2955	18.5108	3.73682	-6.99655	-8.31278	-2.15678	2.52498	4.53115	13.9787	15.7973	-14.0201	11.0909	-4.9581	7.66468
72	LeY	Fuca1-2Galb1-4(Fuca1-3)GlcNAcb-Sp0	-21.6677	-54.128	-3.40093	12.5384	6.40043	14.3471	4.01913	0.84215	5.41645	9.49728	1.48868	9.00128	-186.198	67.3458	59.2511	3.49138	0.74285	-10.8588	48.1507	6.63348	79.0107	-1.9348	10.3608	11.8778	3.39595	-4.97405	-20.7955	2.3542	-10.7831	0.946275	2.90098	9.40832	-23.928	-15.3469	0.166625	4.01548
73	LeY	Fuca1-2Galb1-4(Fuca1-3)GlcNAcb-Sp8	129.668	-31.1929	93.8408	-0.432775	-5.5697	1.03663	-2.10492	-7.065	10.1197	-0.5082	8.45057	-1.21188	-54.1372	-45.3816	2008.49	-1.54208	2.25578	-9.76608	-1.8817	-2.0593	0.9565	3.15288	10.47	10.33	4.64828	-8.66277	1.97415	-1.54415	4.7646	8.11802	1.33798	3.63215	-12.8749	-6.54768	-1.3458	-11.6027
74	BG-H2--	Fuca1-2Galb1-4GlcNAcb1-3Galb1-4GlcNAcb-Sp0	7.66098	-9.75108	10.8791	1.43765	-3.89102	1.8678	3.88285	5.01342	1.73377	-3.09603	-0.495775	2.55615	-38.1067	-81.4679	242.036	6.21407	-1.26438	3.74543	1.59793	-6.18567	-4.93315	-0.8615	2.8621	7.83983	5.2407	-16.9723	2.88453	1.08615	-2.10362	1724.73	276.722	38.7914	-3.06708	-24.4182	-7.04217	-11.7321
75	BG-H2--	Fuca1-2Galb1-4GlcNAcb1-3Galb1-4GlcNAcb1-3Galb1-4GlcNAcb-Sp0	582.05	-16.6342	5.63668	8.33922	-3.4451	2.52635	-8.69935	-5.85023	3.44155	8.311	4.98173	3.86878	104.629	-154.571	735.43	-4.4174	0.5302	-10.2938	-6.54655	-7.15018	0.7852	-0.17175	25.3354	14.4904	12.8656	-6.3296	-1.0202	5.32642	-9.16028	707.049	43.7506	12.0335	0.123	-10.7391	5.3278	-9.58218
76	BG-H2	Fuca1-2Galb1-4GlcNAcb-Sp0	-6.3897	12.7643	22.606	2.38355	-2.67035	0.2828	-6.0281	-1.56803	0.108375	-1.55627	0.231025	11.7071	-6.28335	-91.8299	61.8323	-0.6538	-2.7483	-1.4114	-1.96557	-3.78523	0.58795	-0.3576	9.81695	0.4862	3.14135	3.02557	-11.9462	-6.97097	-0.938975	3.7593	15.1761	0.734675	-9.53935	-18.6552	-2.65978	-10.5221
77	BG-H2	Fuca1-2Galb1-4GlcNAcb-Sp8	18.1595	-20.3674	11.4377	-8.02715	3.6455	3.9092	-9.32422	3.69372	20.3434	6.10675	-3.38558	16.3064	-94.1747	30.7229	224.418	-4.16778	-2.405	-10.4679	-6.05225	-2.06188	-1.34895	-1.90678	5.93323	16.9095	1.8849	10.0285	15.7488	-2.06162	13.1224	74.0425	21.0865	11.038	-3.11625	-28.4135	14.3787	-5.07365
78	2'FL (BG-H6)	Fuca1-2Galb1-4Glcb-Sp0	-42.7253	-6.107	81.5678	-5.19113	-0.153975	19.4104	-12.7769	3.78053	11.7777	-4.64827	6.7795	1.7368	17.1986	179.357	418.553	9.88995	-4.68417	2.19865	3.59505	3.5459	18.387	3.34552	9.63398	-0.107025	2.0118	-0.790975	-16.0126	9.23893	6.2762	21.2543	12.633	9.95183	-10.5598	-21.0046	1.6296	-4.25173
79	BG-H	Fuca1-2Galb-Sp8	-72.0542	-32.7726	16.9416	0.045275	-2.45237	10.5793	-19.0405	7.59887	21.7825	-0.45775	9.6764	10.7535	-119.908	-39.0428	415.412	-1.84295	-0.785725	-9.89325	7.06482	-1.59563	5.0092	-2.0929	13.7212	7.42265	8.95942	6.18392	-12.5627	-4.32058	-4.60835	40.5133	15.8246	8.65992	1.4803	-17.9784	8.0833	5.05325
80		Fuca1-3GlcNAcb-Sp8	-42.3915	-15.709	15.052	-0.9551	-3.25948	2.9118	-0.706775	-5.59225	-0.1032	-5.36472	-0.324475	0.929725	-32.8053	-22.0927	143.943	-0.585175	-3.70213	-15.8693	-10.1826	0.8123	-1.19042	-3.4221	8.03523	0.42565	11.1642	-14.2095	-16.1453	-7.62015	9.22747	13.2992	5.62913	1.99935	-4.3805	-34.579	-8.95868	-10.9486
81		Fuca1-4GlcNAcb-Sp8	-86.3448	-42.2139	-2.1454	-5.77542	-4.99757	-9.17055	1.9406	2.37405	-5.08358	2.68792	0.5529	-13.9205	-101.181	-64.3115	368.217	-16.9321	-7.96653	-24.5582	-5.4593	-1.6548	-5.34197	1.06205	2.07765	7.93205	5.97607	-10.0715	-5.16007	-5.8466	-9.17575	11.8328	6.08435	2.79022	-6.41255	-38.552	-0.85435	-18.9357
82		Fucb1-3GlcNAcb-Sp8	-27.5152	-21.6084	8.27375	-3.43032	0.330275	5.0705	-11.8266	-4.7847	2.28887	-10.5478	-0.109975	12.5885	-88.1721	-40.3398	83.0022	-8.14457	-2.6144	-12.5243	-8.94652	-7.30403	-0.8028	-5.8226	7.27782	2.34473	7.47367	-6.65135	-21.5622	-3.48517	5.81665	5.6768	6.43713	3.43162	0.56495	-22.6057	1.8566	-11.392
83	BG-A1	GalNAca1-3(Fuca1-2)Galb1-3GlcNAcb-Sp0	-115.162	53.3311	0.86525	-1.25978	-7.66292	-0.77975	-3.9557	4.4691	11.3664	-0.3596	1.6543	-14.8014	-126.311	517.333	95.4503	-15.2515	-2.83355	-14.0298	7.16467	1.40165	26.2653	21361.4	23292.5	15277.3	2985.43	-11.4176	-31.612	10.2916	-8.69778	5.68592	6.55815	10.1704	-14.9969	-39.653	-7.36215	-7.50408
84	2'F-A type 2	GalNAca1-3(Fuca1-2)Galb1-4(Fuca1-3)GlcNAcb-Sp0	-44.8918	-39.92	29.1918	3.43205	1.4216	33.4387	-6.85608	2.62288	66.2403	8.6988	15.235	31.7691	-60.5324	-38.1832	272.749	21.6217	15.4875	0.6908	90.2463	50.0736	64.7688	16400.9	17333.8	15575.5	4069.69	-24.2001	1.43153	-0.30015	24.6261	16.0713	13.727	26.13	-7.3858	5.6406	12.3487	9.99618
85	3'Su-FL	(3S)Galb1-4(Fuca1-3)Glcb-Sp0	-15.4258	-13.4823	25.0007	7.71323	-3.18407	9.30355	0.759925	2.12892	3.0957	0.536025	0.3784	0.84455	71.6051	-81.1075	90.8634	40.1162	-5.76048	-6.34918	145.773	37.0988	0.96825	1.21133	16.2896	9.36778	10.6605	-9.95315	-7.39208	-5.58505	-6.43933	5.24135	4.51488	1.49133	-17.3451	-14.9359	-6.88315	-7.07613
86	BG-A2	GalNAca1-3(Fuca1-2)Galb1-4GlcNAcb-Sp0	-6.7366	2.62547	9.1843	4.88497	1.0018	-2.63072	1326.28	395.396	50.0986	2.10197	5.36343	6.38375	-11.2284	-26.403	149.478	-7.85757	-1.06578	-2.67335	4.47577	-0.269	-11.375	20497	22457.4	8025.68	1038.03	-9.82617	-20.3117	0.18255	8.35303	24.9544	7.76185	7.96572	-25.3704	-7.7875	-5.67965	-13.0444
87	BG-A2	GalNAca1-3(Fuca1-2)Galb1-4GlcNAcb-Sp8	-25.0631	-26.4543	13.5137	-0.680875	-4.25188	5.75375	8601.44	1117.21	179.938	0.69915	-5.04417	-0.00925	98.8437	-101.48	155.519	1.82973	0.99635	-16.5053	-7.021	2.91512	-3.89328	27937.4	22861.2	11763.9	2338.49	-2.39632	-6.75155	-0.131225	-16.3163	141.386	7.2518	4.07485	-19.2193	-20.5852	-3.57155	-9.93652
88	BG-A6	GalNAca1-3(Fuca1-2)Galb1-4Glcb-Sp0	26.745	-11.7065	23.1677	2.4843	3.08358	10.1158	-7.068	-0.027025	3.6181	-2.20145	-4.16718	2.67615	55.494	27.515	9.4823	-1.87353	-0.1054	-6.4925	8.3598	-0.13435	-14.7734	13468.6	21943.7	12715.3	1821.63	-15.5638	-18.2172	-0.176975	-9.1977	1.93178	7.29778	15.0469	-13.3057	-33.6633	-6.08595	-10.2938
89		GlcNAcb1-3Galb1-3GalNAca-Sp8	-20.6274	3.5061	29.0962	8.6535	2.88477	5.74173	18.6291	39.4568	25.8718	9.491	-1.59382	9.1192	395.888	7.31535	94.1097	10.1514	9.9078	5.65738	-0.666875	3.85442	6.1271	8.4197	16.4292	9.2131	14.7059	-1.8494	-17.2547	7.89372	-13.5807	25.3514	9.11417	12.8562	-10.9968	-15.243	10.7325	-6.11015
90	BG-A	GalNAca1-3(Fuca1-2)Galb-Sp8	-2.66647	-24.2891	39.4829	-0.04425	0.053675	-8.94117	-4.61715	-3.51932	-5.16585	-11.567	-1.78383	-6.26447	-31.8619	37.3083	379.141	-11.2492	-5.29887	-13.2779	-0.13445	6.474	21.669	24603.1	25021.6	9933.93	1370.95	-34.4222	-23.7129	-14.5931	-17.9406	9.12742	11.4156	2.8814	-21.6522	-26.0439	-11.3125	-21.169
91	BG-A	GalNAca1-3(Fuca1-2)Galb-Sp18	58.5964	-7.10165	11.04	11.2768	-0.0312	4.23065	-9.97387	-8.08715	-4.30485	0.18815	-7.74637	-10.9998	19.8372	-80.1445	10.9907	-5.37985	-2.36005	-17.4702	-3.7623	-1.9508	24.9423	37398.4	27607.1	11418.8	2147.41	-24.2198	-28.181	-3.2086	-14.9686	6.3115	6.77453	2.6608	348.254	-31.2886	-8.56185	-28.4569
92	forssman di	GalNAca1-3GalNAcb-Sp8	313.572	-35.3537	7.60625	0.880175	-2.81232	-0.10965	49.3006	15.9643	-3.98287	-1.05612	-4.98652	0.489475	-101.245	97.482	-1.91443	-8.04475	-2.18515	-19.3767	-4.82365	-9.22682	-11.7809	39634	25750.4	9947.93	1109.41	-23.2078	-27.7438	-14.2569	-17.3732	-0.806425	0.4162	3.5186	20817.7	749.302	27.8835	-41.7324
93	Adi	GalNAca1-3Galb-Sp8	-71.8881	-14.5566	159.06	-3.17328	0.310325	7.14508	2.3867	-1.43722	7.73723	3.1794	-0.8913	12.3409	44.1358	711.178	85.6737	3.17313	-11.7593	-11.1802	-16.3886	3.977	37.4381	28506	27335.6	15046.9	2592.27	5.04085	-24.2054	-2.72858	-21.1984	34.1157	4.05975	4.14583	23039.5	1253.86	34.3461	-17.8782
94		GalNAca1-4(Fuca1-2)Galb1-4GlcNAcb-Sp8	99.5726	-21.4167	1.681	-2.2634	-1.2163	-6.82772	39817.6	35816.5	4627.83	121.029	76.0107	9.29265	60.638	194.292	28.1453	-3.38295	-0.807275	-12.902	16.5885	-9.73938	27.7723	28026.9	28553.3	13594.5	1544.9	2565.4	38.1302	7.86	-27.5415	262.111	1.2725	-5.81155	12885.7	112.923	-0.63515	-27.1756
95		GalNAcb1-3GalNAca-Sp8	-30.3588	83.4032	-0.511675	5.96135	11.6813	10.8868	-11.1115	4.26695	5.1395	-2.96172	-1.4352	20.1498	-109.356	379.609	94.5162	-4.44532	2.961	-6.56588	35.2878	11.5646	31.9845	-1.70485	5.93785	6.31225	9.48098	0.794	-9.63957	4.29848	-8.09398	7.69575	5.62547	6.29645	-3.8263	-4.68287	21.467	3.14977
96		GalNAcb1-3(Fuca1-2)Galb-Sp8	12.182	-37.2412	-1.43883	7.07015	-3.25635	-0.31515	19.3697	6.9781	-6.42635	-0.33935	6.01242	7.2504	5.3195	35.5591	123.701	-7.67675	-6.40767	-8.47885	61.0677	-9.81105	58.2878	7414.11	4076.38	1044.61	53.6601	-7.51147	-27.7174	1.84575	-13.7343	9.93682	-0.528175	6.35258	4026.75	4.3529	2.86635	-3.25518
97	Gb4 tetra (P1 tetra)	GalNAcb1-3Gala1-4Galb1-4GlcNAcb-Sp0	118.752	-54.1002	6.88433	-0.2541	-2.01218	18.8896	-40.8942	23.9713	-1.50647	-4.87508	-3.09712	16.3983	-65.7297	8.9706	144.455	19.8643	-8.93182	-12.2921	10.9062	13.1512	21.4139	-1.9407	9.49483	7.23348	2.0658	-8.06377	-14.8602	-2.47707	-15.52	61.1501	1.0375	4.90497	1624.79	-16.454	7.95313	-12.4562
98		GalNAcb1-4(Fuca1-3)GlcNAcb-Sp0	-99.6106	-38.7785	17.685	24.9745	11.347	4.11917	11553.8	194.72	80.7764	0.0108	6.50835	21.3227	-55.1397	5.81598	365.429	-0.755975	11.8652	6.94308	22.8762	7.1921	25.5008	0.789475	9.31757	14.929	20.0312	1.42403	-20.0993	2.2305	-6.16812	626.379	5.9786	5.0592	-7.3339	-34.8383	1.44452	-11.6228
99	LDN, Lac-di-Nac,	GalNAcb1-4GlcNAcb-Sp0	-42.3801	-11.7909	71.8643	-3.323	-4.537	-5.09692	39397.9	33531.5	15043.1	235.898	78.8858	9.76342	102.913	32.6108	193.385	-7.68013	8.6701	-9.07065	3.67858	0.78525	-1.37475	4.19748	9.30392	13.8201	2.31867	1301.17	-28.0335	-7.44475	-12.7836	3944.25	12.8871	16.9932	25314.5	2013.28	15.1016	-42.1297
100	LDN, Lac-di-Nac,	GalNAcb1-4GlcNAcb-Sp8	0.1976	-3.5473	8.13053	-3.0814	-4.6066	1.0938	38232.8	31822.7	8521.89	573.501	110.041	42.3853	114.169	80.0624	59.3499	0.64635	-4.74192	-3.4824	6.4787	-3.54223	10.2556	0.450575	20.4339	9.6464	5.99032	1576.07	-10.1945	-2.58215	-10.0195	4921.49	17.231	6.036	15150.9	521.721	2.37525	-18.6788
101	Gala1-2Gal	Gala1-2Galb-Sp8	390.675	-1.30695	56.1135	5.1014	2.53035	2.12185	-0.8736	-3.2711	11.5726	22.3069	1.13855	4.18575	20.7626	-105.538	3785.43	2.74705	7.93275	0.8345	3.90617	5.61395	0.505125	2.69248	8.08202	21.5941	5.31293	-2.79628	3.33745	-4.44985	6.5657	45.1664	21.2041	13.2875	-13.6192	-11.8152	2.8118	-3.75995
102	BG-B1	Gala1-3(Fuca1-2)Galb1-3GlcNAcb-Sp0	226.301	17.4505	24.0281	10.7504	15.0016	15.3511	-0.94575	0.2324	7.42212	4.96905	9.07913	18.8179	188.243	-101.059	110.959	55.9287	0.16055	3.43255	-3.28233	1.71975	1.22012	2.81498	5.19473	8.20982	7.88365	-11.4099	3.00185	-3.75808	-0.050025	21.8691	11.1043	3.8792	-6.30202	-7.71428	1.44085	-1.38498
103	BG-B1	Gala1-3(Fuca1-2)Galb1-3GlcNAcb-Sp8	-9.56642	-24.7543	143.926	16.0403	20.7465	22.5014	-7.1782	-3.23123	20.5896	-0.326575	3.28752	33.6637	78.3616	-138.314	2683.77	11.5201	13.3453	2.53155	33.8973	8.78632	23.0016	7.50985	22.0853	26.7501	20.7188	-4.11068	-11.5195	1.6844	-7.70403	34.1919	29.146	26.4155	-3.28233	-18.5182	12.5482	-2.41125
104	2'F-B type 2	Gala1-3(Fuca1-2)Galb1-4(Fuca1-3)GlcNAcb-Sp0	2.54818	97.7993	54.8644	4.47662	0.725225	35.5233	-1.71285	23.2741	34.3389	9.2619	11.0466	28.4662	6.93017	-132.329	83.1418	18.7788	32.5168	7.0338	4.082	8.51095	19.3979	7.60237	17.1412	35.2746	7.42432	0.086625	-1.79215	19.516	-1.53465	18.2899	25.683	22.9853	11.7862	7.30108	6.26298	6.38805
105	2'F-B type 2	Gala1-3(Fuca1-2)Galb1-4(Fuca1-3)GlcNAcb-Sp8	427.881	-45.7437	74.6757	-2.91585	-2.69715	6.58058	-17.0471	-3.3304	-6.76152	3.40282	-1.46545	13.0915	493.446	-91.7109	754.014	7.97017	7.47242	11.01	-0.4641	10.7461	11.2148	-2.33923	9.53043	10.7567	3.76477	3.26147	-11.5419	-7.11963	-12.3268	6.94553	16.399	9.09635	-1.74658	-10.6356	-1.69748	-5.1489
106	BG-B2	Gala1-3(Fuca1-2)Galb1-4GlcNAc-Sp0	-9.8956	-10.7291	12.2342	-7.3822	3.36788	5.9128	31.2721	3.12923	21.5566	1.2575	0.51735	6.11717	-15.656	-22.0742	165.539	11.3553	2.25445	-5.01438	0.658775	-2.98573	-1.4891	0.988175	2.19647	10.9555	-1.04722	2.1008	-14.9962	-0.766975	-2.84087	45.3069	12.1389	7.39667	-12.0878	1.7987	13.8069	-14.1177
107	BG-B6	Gala1-3(Fuca1-2)Galb1-4Glcb-Sp0	-41.2053	-38.8064	15.458	-11.764	-8.13263	7.93313	-5.88738	-0.00395	15.2696	-5.36417	-1.81202	0.45555	-205.645	-55.3569	770.777	-6.42273	-7.48098	-4.96995	-2.96285	20.4991	9.92575	-3.72737	6.54757	6.64233	3.7388	-3.2333	33.347	-8.27003	-0.043825	15.6067	10.5962	9.44457	-10.4514	-19.4696	1.7914	8.46753
108	BG-B tri	Gala1-3(Fuca1-2)Galb-Sp8	24.5776	-18.9715	38.1071	9.46955	-3.03895	0.94	-6.69207	2.10872	4.49782	1.93055	1.84987	4.02125	-55.2662	-95.8292	323.731	-7.23845	-2.36348	-0.86445	-4.35902	3.62325	33.1194	-1.06135	-1.0587	-0.098525	6.54007	-4.40627	-15.411	-7.026	-3.89055	14.121	9.64503	10.3466	4.35345	-40.2708	-5.22145	-8.69255
109	BG-B tri	Gala1-3(Fuca1-2)Galb-Sp18	-41.5993	14.4207	12.0842	5.13583	1.32085	4.90447	-14.0473	12.9839	14.8534	-4.20967	0.52	9.51757	-118.268	56.8009	607.294	8.93822	1.44412	-11.2242	121.72	13.228	112.522	-5.62395	6.3575	15.8071	5.87233	-8.30367	-18.7184	9.98388	-16.7423	23.5475	13.3126	7.952	26.6369	-31.3832	18.478	-16.937
110		Gala1-4(Gala1-3)Galb1-4GlcNAcb-Sp8	-0.8513	-48.8512	2.64085	3.42895	12.6185	14.7936	9622.93	1265.9	80.1087	6.54373	-1.83543	32.5934	483.488	364.664	56.9575	20.9095	6.7573	15.5843	99.3271	19.3984	62.4414	23.3051	21.8373	13.5312	5.32533	-20.8837	-16.3031	-1.67582	-12.7749	4429.72	378.231	74.1239	-14.861	-79.5329	-12.952	-27.4529
111	Tfaa or core8	Gala1-3GalNAca-Sp8	-36.5102	9.2139	6.69865	46.5562	27.1391	23.031	7.00447	26.6738	2.45995	16.1883	1.96598	7.4065	-103.085	301.468	88.4648	30.5925	25.8933	5.2043	55.8815	17.0194	55.8753	29.7874	30.2774	22.0611	23.0032	13.3185	-16.1831	5.12833	-14.4632	23.3539	25.0486	15.9682	20.2596	3.70517	-6.71487	13.2533
112	Tfaa or core8	Gala1-3GalNAca-Sp16	-13.2105	2.89663	29.158	2.27987	-7.0809	-2.36655	-9.02025	-5.68693	10.021	6.60173	-2.29092	8.63795	5.0915	-85.5562	39.2028	0.646025	5.56242	-6.0458	11.4122	7.4859	-2.26105	-1.32692	19.3719	18.4486	14.3672	-9.69452	-10.2225	2.30175	-3.6572	9.71053	13.5543	4.09788	-9.86125	-12.5524	0.8487	-10.2879
113	TFab	Gala1-3GalNAcb-Sp8	20.8531	-10.2356	16.3892	-0.1895	1.48308	10.6097	9.08955	5.56535	-1.23	-1.46952	19.7054	1.79658	88.4042	-30.1887	460.096	-0.57735	4.98765	-5.32695	-2.0644	-3.3292	-8.87335	0.625325	7.35422	7.4975	10.0916	-37.3285	-3.01367	14.1831	-12.4656	6.88655	21.9303	22.3331	-14.1093	-8.53662	-4.62772	-7.12235
114	Gala1-3LeX	Gala1-3Galb1-4(Fuca1-3)GlcNAcb-Sp8	-18.7285	66.6771	4.5561	4.54282	-1.70655	6.24192	-10.4258	-6.14787	7.09352	3.87705	-5.7985	-2.89125	178.889	-14.1323	115.556	6.8655	1.84147	-5.48352	0.3765	0.920775	21.3024	1.80707	13.3514	11.4517	7.84142	18.492	-4.40643	11.338	1.11755	656.545	113.798	35.0495	7.79587	-13.9028	7.68395	-8.0322
115	Gala3-type1	Gala1-3Galb1-3GlcNAcb-Sp0	38.6278	3.66083	-3.21553	0.7994	8.4417	4.2391	-12.9308	-12.4374	-0.38965	5.37678	-2.68867	7.67082	-134.563	306.291	32.1664	2.2956	2.5899	-11.5753	14.0558	3.26518	-1.18335	6.95485	14.3109	4.89428	4.5391	-21.0868	-11.4663	-5.83855	-10.5346	267.248	118.917	27.9465	-14.9389	-17.1654	0.635675	-6.79612
116	alpha Gal	Gala1-3Galb1-4GlcNAcb-Sp8	-37.1272	-23.0605	1.38005	0.94995	1.8993	8.65842	-14.4654	-7.08963	9.12772	-1.20622	-1.22157	5.09933	419.502	-16.95	37.764	7.76798	-7.08938	-2.36468	2.07513	5.4247	1.79973	-1.4195	14.1859	0.1007	10.2749	-13.53	6.89077	-2.68667	-2.2271	886.549	173.679	58.9235	-10.6396	-6.31522	-2.54385	-12.5798
117	Galili-tri	Gala1-3Galb1-4Glcb-Sp0	-18.0836	-18.4384	42.6072	4.1588	6.70182	14.6427	-11.0405	-2.13778	4.15947	-1.10093	0.6159	11.7204	0.793375	45.1297	49.674	-1.45118	5.57658	-4.83428	14.3731	17.9812	21.6248	5.7765	5.15998	10.7323	4.6586	-31.1844	-34.5895	-14.5728	-9.7431	107.619	51.6766	15.9385	-19.985	-15.4676	-17.3842	-12.0381
118	iGb3	Gala1-3Galb1-4Glc-Sp10	22.4078	-21.4296	42.6678	3.70497	-6.75807	9.2649	-11.7918	1.8792	-4.39477	-0.54415	7.60415	8.10997	-5.94853	-30.894	172.044	-6.85065	-12.5816	-8.6822	12.9442	11.087	-8.80483	-2.2991	6.3445	18.2902	6.17645	-15.4871	-17.2397	13.316	-18.8413	49.0605	17.428	15.0983	-18.8902	-33.1502	3.30337	-7.30388
119	Bdi	Gala1-3Galb-Sp8	26.0327	-11.5586	0.473525	1.0074	11.6395	18.4808	4.7336	-2.7143	4.35975	4.70213	-2.67168	-3.71292	-229.64	202.835	33.0045	1.49452	1.5025	2.31788	4.23365	15.1984	71.8077	0.523275	7.2464	14.2754	5.91498	-47.8039	-20.4603	-17.9593	-19.3424	47.3148	128.081	15.9966	-23.1281	-31.4987	-3.5234	-6.9727
120		Gala1-4(Fuca1-2)Galb1-4GlcNAcb-Sp8	95.4133	-59.0376	36.5228	-4.82078	9.31235	7.13195	1824.81	1.25237	1.29553	-5.72323	1.18867	0.7053	-17.8688	123.314	48.4395	-0.216925	11.6907	-4.53547	16.4799	10.8749	89.4978	-0.364825	10.1107	22.4679	12.1282	21.0256	-18.0005	-0.25905	-5.89685	228.731	55.05	28.6205	-9.44768	-38.4312	9.40463	-1.58215
121	P1	Gala1-4Galb1-4GlcNAcb-Sp0	-4.09733	2.94803	20.9387	8.66405	21.7755	0.09	6.75565	0.3655	44.6085	4.19995	11.3091	33.1167	553.642	57.5292	104.934	13.3795	3.1794	-3.7432	30.9792	8.49765	5.15297	10.1601	8.08718	18.9181	17.4997	-7.78762	-4.73822	-2.02053	-0.991375	53.3228	21.0202	9.83578	1.4428	-26.9931	14.8854	0.259525
122	P1	Gala1-4Galb1-4GlcNAcb-Sp8	-16.2404	-19.4906	28.1028	-0.741175	3.77725	7.04447	85.8012	3.23945	5.29917	-11.6011	-5.6439	7.39215	-9.5025	-67.5838	209.915	25.5832	3.82452	-13.8609	1.46555	4.56637	18.2751	8.63775	13.4063	13.0779	8.9515	-25.408	-21.2072	1.57767	11.9812	330.101	41.1063	13.1412	132.842	-31.2375	-2.51385	-12.4978
123	Pk	Gala1-4Galb1-4Glcb-Sp0	301.947	49.7568	23.6125	3.82082	8.74905	18.5612	14.6218	1.43807	6.84095	1.30678	3.0637	18.5019	1.3498	54.5907	248.474	23.5912	5.5626	-3.18872	28.2012	15.8255	20.2913	3.20125	5.00518	25.5314	8.42888	-21.2815	-9.22985	2.485	-7.58152	25.2308	54.2963	11.7876	3.6038	5.80637	0.859	20.8853
124		Gala1-4GlcNAcb-Sp8	596.418	-33.2254	22.3227	-6.17957	3.4351	0.152375	-8.78583	-2.22905	4.04727	3.40847	-5.34558	2.00865	-45.5597	-142.59	1233.98	-2.63512	-2.1254	1.67573	6.66965	-4.01478	-0.4274	-3.90963	1.5071	0.0015	4.55747	-7.68135	3.29267	-2.1557	10.0392	302.369	46.0657	10.4278	-8.02643	-24.5352	4.67775	-11.5142
125	melibiose	Gala1-6Glcb-Sp8	-38.3487	6.15318	39.9035	-0.040425	2.91975	6.68517	-9.65262	9.8616	-2.72858	1.08303	0.887425	36.4054	-8.4963	-96.325	234.177	9.59977	-5.09417	-0.89765	-0.011875	-1.51945	28.0911	-3.09303	1.36817	13.4977	7.52952	-22.2929	-4.85293	-2.68558	1.07642	2.92432	11.2745	10.3023	-17.1005	-8.54302	-0.10455	-3.10363
126		Galb1-2Galb-Sp8	733.226	-47.1526	44.4497	9.33402	-6.45045	3.61082	-21.0685	2.51942	10.5815	-6.05683	0.79285	7.85585	-16.8227	-272.123	4311.89	-10.8735	-1.43407	-18.9737	6.41125	4.4452	6.50025	-3.1065	15.8492	10.2336	9.44748	-15.9427	-7.84003	-6.2382	-6.27365	3239.31	676.478	227.348	-18.1536	-13.8776	-2.12745	-2.19053
127	LeA-LeX	Galb1-3(Fuca1-4)GlcNAcb1-3Galb1-4(Fuca1-3)GlcNAcb-Sp0	-17.3097	-16.7081	8.19815	-6.14618	0.42115	-0.7243	9.2572	-17.2632	10.0608	19.4749	-0.417225	15.8568	14.7562	-58.8602	46.565	2.85493	-1.36615	-11.8846	3.64997	0.35335	-1.84885	-0.776725	7.66243	2.29415	8.29013	-14.7904	-6.38292	-8.72755	-2.63955	14.0328	3.64233	5.98148	-19.6045	-22.8065	-9.53875	-24.7165
128	LeC-LeX	Galb1-3(Fuca1-4)GlcNAcb1-3Galb1-4GlcNAcb-Sp0	-137.98	-72.6437	-8.67217	-15.3393	-11.5523	6.1151	-24.2624	-3.68023	18.2978	16.3492	5.14905	13.4526	-37.8121	-94.9667	2581.05	-1.31812	-9.15527	-9.78423	-3.4695	1.0926	2.84845	-0.70115	6.75715	9.3731	6.25248	3.11143	-14.985	-3.22295	5.36365	284.43	27.6327	8.11375	-11.7577	-11.2899	10.0761	-5.67413
129	LeA	Galb1-3(Fuca1-4)GlcNAc-Sp0	-42.9162	-9.6069	43.7635	-9.64322	-3.5733	15.1904	-27.6056	-6.2418	26.4833	2.2763	-1.13535	15.6574	5.47105	1.35247	203.33	-5.35535	5.35727	-6.50405	0.571575	14.4994	2.0484	2.42647	5.29148	13.7639	12.9861	-2.90863	-18.7264	-11.9734	0.82645	12.715	13.4296	13.3648	-9.07697	-17.3879	-7.1951	-17.6714
130	LeA	Galb1-3(Fuca1-4)GlcNAc-Sp8	-139.108	-20.8193	13.4579	-9.499	-4.82475	-2.8643	-23.924	7.8455	11.3951	2.0128	-4.21623	31.0251	-155.736	30.0505	423.177	13.8653	-9.77342	-17.2492	-8.0474	-10.6637	-7.80123	-4.27032	4.76438	10.6199	3.6804	-18.0623	17.2643	-7.62815	9.31053	4.7851	-0.036725	5.22338	-16.7262	-6.78907	-14.0155	6.06548
131	LeA	Fuca1-4(Galb1-3)GlcNAcb-Sp8	-68.5537	-33.0558	29.4671	4.46123	-4.74997	4.27265	-6.24935	-6.54213	13.1184	-8.14993	-14.1672	14.9442	-62.668	-83.3712	248.936	1.90867	-4.0906	-3.69233	-5.4551	6.62482	8.39267	-4.49408	8.05248	8.88675	3.12763	-19.7057	-13.1716	-6.03508	-7.13975	5.11555	15.5889	8.7583	-15.8066	-32.6049	-1.12935	-4.7131
132	F1alpha	Galb1-4GlcNAcb1-6GalNAca-Sp8	-36.5363	67.501	19.11	4.24333	-2.25227	4.04583	18963.7	3733.68	1404.06	11.2391	-2.52557	20.3797	207.751	199.461	213.528	1.30885	12.0624	0.144175	98.9498	6.9782	19.0125	3.80993	5.6507	9.70937	18.2317	709.308	-16.6218	-5.6737	-13.8215	31859.4	11168.5	1260.72	-14.3163	-37.5346	-7.43378	-8.54573
133		Galb1-4GlcNAcb1-6GalNAc-Sp14	18.9527	-51.0779	34.3865	8.56922	19.9273	15.2053	2.57808	7.36517	16.8079	4.58277	19.4043	20.6616	-101.344	17.8939	199.472	10.6549	1.4943	13.7369	61.7724	7.51975	28.8078	4.53727	4.27147	19.646	3.45992	-11.2651	-9.41767	-3.81698	2.54007	15.9602	16.0516	9.95205	-11.7277	-41.0025	-1.68645	-19.3419
134	core 2	GlcNAcb1-6(Galb1-3)GalNAca-Sp8	-12.0166	2.56045	19.5968	8.34378	11.0315	6.16555	4.61062	14.5914	39.7544	10.2335	11.5611	13.9895	-126.809	243.691	248.081	8.68778	5.072	-6.75803	39.6301	0.948225	24.368	8.5755	20.7052	6.31147	4.11402	6684.25	876.222	24.2711	-19.7084	219.392	26.1459	11.4122	-4.27485	-39.3243	5.0933	-9.72153
135	core 2	GlcNAcb1-6(Galb1-3)GalNAca-Sp14	2.1194	-17.791	34.6966	-3.911	-4.30485	-4.6824	6.97312	-11.6792	-1.7319	-8.70763	-12.3931	4.743	3.75165	-76.9041	22.0622	-1.31943	-6.27608	-4.2262	-1.34427	1.953	-10.0282	-4.14958	4.60842	0.4188	4.18777	549.536	15.663	15.8938	-11.0544	5.10275	35.8413	9.18328	-17.2434	-38.9927	-10.0125	-21.0585
136	6STF	Neu5Aca2-6(Galb1-3)GalNAca-Sp8	-10.5558	-18.2575	35.1345	-1.63387	-3.49683	-6.14423	-13.5756	-16.2378	-3.12265	1.16747	28.741	-2.3747	-71.9698	26.8707	4.7113	-3.7488	1.1849	-12.199	-5.7634	-7.58798	-21.4644	0.319175	2.378	5.27813	-1.03483	2.49855	-21.5161	7.23367	-26.4339	3.76642	9.54813	13.4356	-30.3913	-24.475	-12.0852	-17.3278
137	6STF	Neu5Aca2-6(Galb1-3)GalNAca-Sp14	25.8415	53.3223	29.5723	-2.34347	5.79948	3.82478	-6.64808	-7.52635	18.8102	3.8969	-7.54465	3.644	98.9022	-59.8087	170.139	5.87357	8.84858	3.76678	-6.49932	-3.54255	-4.00872	0.62585	5.49468	18.7417	17.1776	-10.2686	-16.9828	0.27215	0.44025	18.0467	16.0676	10.3078	-20.6356	-15.3122	-6.95722	-7.13123
138	6STF	Neu5Acb2-6(Galb1-3)GalNAca-Sp8	264.603	-13.2294	10.4801	1.83223	-3.2449	8.1871	-14.2326	0.5777	-0.9272	11.4753	-6.88335	4.8556	-99.0343	242.372	136.935	-5.8126	-0.554525	-11.1276	-4.3978	-9.03667	-0.843	-3.67092	15.4525	10.2997	3.38918	268.641	-19.6954	-12.9141	-22.7452	14.1667	29.3871	8.76383	-25.9546	-47.9149	-9.83363	-21.6468
139	LSTb-like	Neu5Aca2-6(Galb1-3)GlcNAcb1-4Galb1-4Glcb-Sp10	-52.5283	-32.2768	7.8221	6.0487	-0.727	1.38012	-4.70695	-6.0194	-9.35083	3.62823	13.6343	-1.83803	-4.49152	-68.2735	39.422	1.44938	-4.04315	-12.1357	5.63785	7.7335	4.86953	-3.01698	7.5918	1.42298	12.9082	-22.2771	-11.7355	-10.4524	9.38892	7.67697	19.5574	19.8022	-27.9186	-20.8837	4.66345	-16.861
140	TFdi	Galb1-3GalNAca-Sp8	62.3488	27.087	0.88805	6.25305	-3.55748	1.47827	-25.3255	-0.405175	2.42605	-7.87878	-2.44122	11.5745	-133.797	239.631	75.1825	-8.54485	-2.36403	-13.2126	-3.60785	36.4292	7.53025	3055.66	1734.83	105.15	11.6368	6554.6	717.755	3.72525	-28.9205	43.0579	22.4278	8.46637	-10.3423	-30.4353	-11.1632	-18.6322
141	TF(Thr)	Galb1-3GalNAca-Sp14	-71.239	-28.1288	78.9638	5.52625	0.0093	3.85548	-6.78315	10.3582	32.261	13.3498	-11.5607	-3.0296	-30.7942	63.7395	208.891	-2.12593	-4.15235	-13.1083	14.4307	20.8754	31.8457	7.00373	6.61997	10.3007	5.38445	-26.8148	-9.60987	-7.78553	-15.8089	9.33817	28.6612	11.2043	-18.3385	-52.638	-1.53142	-15.0674
142	TFdi	Galb1-3GalNAca-Sp16	-6.75935	-44.2685	-1.63828	2.73035	4.69818	-0.9048	-15.8464	-9.50867	2.12525	8.7556	7.15035	21.7045	-258.576	41.158	56.9314	-6.99725	-1.90467	-0.08975	14.8522	2.67807	12.6407	1.10335	6.78708	6.42027	8.85013	65.0861	-30.3013	-21.8834	-16.2978	15.1613	11.64	18.0886	-32.224	-66.4466	-15.2818	-21.8036
143	GA1di, TFbb	Galb1-3GalNAcb-Sp8	6.2443	12.2506	27.4016	-0.6232	-2.91345	-4.5302	-18.0886	-9.91875	9.2191	-0.31765	-3.00418	9.858	-183.061	-137.857	417.87	11.2622	-2.03622	-23.8084	20.0727	25.067	51.8017	-0.383625	51.8273	2.7655	10.878	6984.29	1243.77	-5.5267	-16.9976	39.3826	30.4232	10.6417	-6.23837	-53.8961	26.4975	-21.5956
144	Gb5/SSEA-3	Galb1-3GalNAcb1-3Gala1-4Galb1-4Glcb-Sp0	-88.9069	-30.9543	67.1184	1.0536	-3.26015	1.46985	7.60425	5.02215	17.1267	-1.04305	12.8314	28.2445	-92.7541	31.4105	244.606	6.92188	6.94598	-4.68075	33.1049	20.8856	14.1634	3.2412	13.3902	1.192	13.2186	3338.33	203.211	3.72243	-7.7692	83.9634	23.0528	9.75923	4.9944	-15.0834	-4.77928	-0.769875
145	GM1a	Galb1-3GalNAcb1-4(Neu5Aca2-3)Galb1-4Glcb-Sp0	-2.52955	-67.9437	20.0321	-4.31525	-1.3733	3.43455	-13.59	-19.4246	-5.46888	4.10433	-9.24107	-3.06603	-95.1889	-94.7696	619.127	-6.3765	-2.36272	-19.0703	1.4817	-3.73315	-0.063425	-0.117675	7.26103	6.72017	4.63795	66.9864	-4.70887	-5.48135	-13.2324	12.7016	3.918	6.00203	-17.4607	-42.451	-6.27648	-16.753
146	GA1	Galb1-3GalNAcb1-4Galb1-4Glcb-Sp8	-33.6198	-16.1102	13.2013	6.16778	-0.098425	12.5699	3.29365	-4.09375	10.5924	-0.46545	-2.4708	13.7279	-101.223	764.738	81.1523	14.281	8.49857	2.7503	20.8691	6.1621	3.7886	5.27298	26.0013	15.9348	14.7135	7679.29	1011.2	9.81163	-6.84555	63.1096	27.6538	19.7521	8.9886	-14.3436	4.87528	-4.08263
147		Galb1-3Galb-Sp8	676.045	-31.2023	11.1896	4.23857	-4.29605	-9.28383	0.862425	3.42625	-7.00502	5.25645	4.60675	-3.54975	14.4887	8.24245	645.708	3.2481	-7.635	-19.6174	-4.96245	10.0201	-0.391175	1.01702	6.23913	4.0871	2.53803	-24.0912	15.6278	-2.68118	12.7858	1390.17	300.455	57.0579	-12.046	-24.9826	-1.8559	-18.5984
148	pLNH tetra	Galb1-3GlcNAcb1-3Galb1-4GlcNAcb-Sp0	30.6396	-12.3186	8.804	4.70935	0.572575	8.58227	-0.817	6.9825	6.21847	-2.00263	-1.09202	-2.75152	-18.1092	-61.541	265.535	-5.61555	-0.48235	1.78012	3.32643	1.24307	-3.3232	-3.6529	9.1093	13.1094	10.1805	-9.43448	-7.5448	-10.7583	-1.1249	590.089	81.7919	12.7793	-8.41055	-14.7567	2.99887	-13.0975
149	LNT	Galb1-3GlcNAcb1-3Galb1-4Glcb-Sp10	321.334	-15.2459	22.9123	0.10105	2.24183	3.94435	-5.27515	-14.5137	7.80933	3.02192	-1.37352	4.84457	281.245	-77.0023	593.039	-8.3702	-1.67905	-18.8099	7.01718	-2.69575	12.186	-2.6918	11.3506	9.9021	5.8118	-21.6442	-26.8562	4.08138	-3.8124	593.046	69.7202	27.6894	-11.4734	-29.9507	-6.95197	-13.5081
150	LeC	Galb1-3GlcNAcb-Sp0	-34.3786	-12.035	23.897	2.9736	8.74158	1.97362	-7.80745	1.47995	13.0377	-0.493125	3.4673	14.3325	43.6669	-77.52	923.202	0.978325	-0.3765	-17.3251	-1.48607	-3.75783	-1.60817	-0.572125	13.1044	5.85342	5.08662	-17.1677	-6.9303	-12.4324	-9.91565	201.942	39.4796	3.45852	-22.5868	-43.7607	-8.35498	-15.6536
151	LeC	Galb1-3GlcNAcb-Sp8	-48.0991	-14.9012	24.8887	-10.0153	0.7725	9.18935	-19.166	-2.68265	4.48495	10.8362	-2.97423	4.09768	16.5474	70.374	289.989	10.2094	-0.809825	-21.2745	3.41545	-6.2348	-8.13795	-2.9842	12.3257	2.42645	14.2592	131.037	-5.15523	-1.32038	-5.5887	598.189	106.362	41.5534	-11.4206	-26.0714	16.219	-15.0331
152	LeX	Galb1-4(Fuca1-3)GlcNAcb-Sp0	17.975	1.78715	18.8056	-5.11785	3.1688	-0.919175	-19.972	0.98655	13.5669	2.60735	6.41655	19.8628	13.3406	-10.2927	858.609	-2.2269	-4.8794	-15.8037	-2.98263	7.86565	7.64122	-0.8492	7.87377	6.29845	-3.27215	-0.377925	-9.79863	2.6133	-10.4817	10.3667	20.7089	19.7288	-13.8459	-22.5315	-8.50238	-10.4149
153	LeX	Galb1-4(Fuca1-3)GlcNAcb-Sp8	-55.5051	-28.5216	5.35672	-3.61052	11.1175	-0.94095	-9.46432	-13.8159	-2.45025	0.630025	-0.91115	-5.14275	-100.387	-21.7864	136.189	-0.2313	-0.104225	-7.3383	-1.41837	1.47925	4.63883	2.03955	8.08102	1.486	10.6999	-5.20673	-27.612	-9.74098	-13.0707	6.97067	4.95725	6.28605	-12.2991	19.8541	-6.86145	13.3936
154	LeX (dimeric)	Galb1-4(Fuca1-3)GlcNAcb1-4Galb1-4(Fuca1-3)GlcNAcb-Sp0	403.812	292.475	81.8573	6.01778	-9.7362	4.96333	7.0115	-7.46895	35.4581	-9.49412	8.22037	8.3482	115.331	51.8032	498.001	2.71985	9.76528	-7.52145	-0.4928	15.7028	17.1915	2.29375	5.34192	5.8946	16.0396	-1.63535	-7.94745	-3.1632	2.1867	10.1852	9.73333	8.49737	-15.832	-16.3564	-9.88142	-8.5576
155	LeX (trimeric)	Galb1-4(Fuca1-3)GlcNAcb1-4Galb1-4(Fuca1-3)GlcNAcb1-4Galb1-4(Fuca1-3)GlcNAcb-Sp0	-40.3147	-5.3208	10.0685	14.0799	7.60025	9.6499	-11.2754	-0.432225	2.49622	2.9418	-3.05025	3.4382	-97.4866	-4.4272	148.701	-0.6555	-3.4361	-10.5731	116.876	41.0511	128.747	0.2819	20.8845	6.15735	4.04643	-17.6178	-22.4843	-2.9949	-12.3485	4.3704	-0.893725	4.215	-10.3526	-26.6591	-7.82953	-12.408
156	Lac(6Su)	Galb1-4(6S)Glcb-Sp0	-17.4387	-75.6515	12.6474	-1.37958	11.343	4.40263	-3.05402	-1.31163	3.46972	2.16897	9.6625	15.8909	-97.1783	189.577	212.823	-4.95995	-5.3893	-2.91195	1730.66	1127.86	104.611	-1.6775	3.2801	9.78065	11.825	-29.2737	-3.37425	-6.57385	-6.82547	1203.58	82.7542	38.1274	-13.5605	-71.3932	-2.47075	-30.3482
157	Lac(6Su)	Galb1-4(6S)Glcb-Sp8	4.87882	34.2616	44.2887	5.96585	19.8857	-2.495	-14.8424	22.6044	25.6467	7.73782	11.4798	8.3923	-24.3665	166.622	146.987	1.921	5.3231	-10.6927	1411.69	1019.78	127.488	5.45112	11.6618	13.2828	6.38575	-13.1433	1.57282	-7.20308	-6.46418	775.138	127.604	27.4293	-11.2314	-15.8816	-2.69458	-3.53888
158		Galb1-4GalNAca1-3(Fuca1-2)Galb1-4GlcNAcb-Sp8	44.8635	-0.563925	13.7373	3.74833	0.215375	-4.30483	-0.664325	4.27832	13.1788	2.19555	0.04575	5.28143	103.511	-15.603	42.3761	1.47232	-2.53235	-2.66125	-10.1563	-3.05605	-0.0418	-3.74752	5.4415	8.40523	11.34	-15.4996	-13.2942	-6.58315	0.937975	59.5681	41.2463	9.37805	-3.3562	-5.4894	-2.94715	-15.7761
159		Galb1-4GalNAcb1-3(Fuca1-2)Galb1-4GlcNAcb-Sp8	-7.6924	-12.3512	83.9034	-1.53722	3.42738	1.29395	2.49817	3.93455	-10.72	5.4144	-6.8304	4.27085	326.447	179.152	53.0167	2.2049	-3.27183	-8.80193	5.39355	-1.55952	-18.0563	-4.31657	4.36013	9.95093	8.27428	-18.2933	-12.0148	7.17992	-15.3535	18.1145	9.2123	4.189	-17.3232	-8.79958	-12.409	-4.20233
160	LacNAc--	Galb1-4GlcNAcb1-3GalNAca-Sp8	163.325	-8.0448	40.0997	1.3952	-0.158975	3.8306	-4.75523	-8.10938	2.53433	-5.551	0.2788	1.9663	-44.3997	-140.063	57.4749	-6.32077	1.41173	5.82788	1.18813	-6.19352	4.9367	-2.00495	1.14655	6.9468	1.97067	2.80455	20.9421	6.22712	-8.35218	31897	13137.1	1313.7	-19.0412	-16.0133	-6.5349	-19.3706
161	LacNAc--	Galb1-4GlcNAcb1-3GalNAc-Sp14	-6.94173	17.4865	92.2914	10.7805	19.0061	9.58995	1.15585	-7.18813	13.012	-4.64317	-1.6192	11.4319	-43.4553	-10.6608	18.2694	-0.24675	8.79207	-10.8581	7.93955	0.6217	-15.8952	2.2673	10.0853	19.8879	17.8544	2.84175	-9.77375	-2.85565	-3.90433	15749.4	1412.68	490.753	-21.02	-25.1279	24.5891	-19.2522
162	LacNAc-LeX-LeX	Galb1-4GlcNAcb1-3Galb1-4(Fuca1-3)GlcNAcb1-3Galb1-4(Fuca1-3)GlcNAcb-Sp0	441.759	295.181	34.07	4.50195	-0.1591	4.8245	-9.3921	21.0649	12.4904	8.65848	15.0741	11.6751	51.7576	-47.3448	102.485	-1.47038	1.03805	-12.4151	-5.30632	14.8167	8.9436	3.9581	5.48323	16.8895	8.92535	-28.2028	-19.122	11.9562	-8.70598	36257.6	15898.7	2425.83	-18.3664	-24.3047	1.59617	-22.5978
163	LacNAc (trimeric)	Galb1-4GlcNAcb1-3Galb1-4GlcNAcb1-3Galb1-4GlcNAcb-Sp0	-26.025	1.40905	-0.183225	-1.36552	2.76117	-1.2311	-17.232	-3.98755	-0.1825	0.2729	4.09532	8.25453	-33.6532	46.5744	42.5672	1.81053	1.5482	-17.9898	23.5605	10.1252	9.66238	-0.02365	8.62672	4.4643	10.4085	-19.2453	-3.7934	1.05997	7.49195	32871.8	16378.7	4913.51	-25.296	-15.2625	-9.3715	-5.0024
164	LacNAc (dimeric)	Galb1-4GlcNAcb1-3Galb1-4GlcNAcb-Sp0	62.026	6.74263	-0.856325	9.17227	3.37588	7.30537	7.89315	-3.47303	6.2489	-0.792	5.6057	16.5719	-62.5735	-56.9251	63.7081	-4.06697	7.6194	-9.52742	6.0981	5.63867	5.59037	-3.48795	7.74437	1.28493	8.03602	-9.28295	-13.8186	-2.47075	-14.3309	35539.9	16893.7	2571.9	-7.53332	-18.0357	-17.8023	-10.0743
165	LNnT	Galb1-4GlcNAcb1-3Galb1-4Glcb-Sp0	-42.4307	-10.5954	22.4798	4.29535	3.66047	7.17355	-12.6544	-15.2434	8.36768	-1.1126	-7.5128	13.4583	-11.8977	96.9834	95.0179	4.19142	-5.81288	-17.7254	3.43988	11.9783	52.559	-0.7868	8.6738	12.9295	15.5699	2.28473	-31.3885	-4.32537	-15.1922	33315.2	22832	7138.23	-37.3462	-32.2022	-0.2094	-22.6112
166	LNnT	Galb1-4GlcNAcb1-3Galb1-4Glcb-Sp8	313.332	59.8207	33.2066	-1.7025	7.64963	6.69968	-50.3311	-16.1128	-4.96102	4.26005	7.51597	4.3349	426.778	-116.01	368.852	6.2846	-2.4582	-13.3821	72.9232	49.4316	103.697	5.27365	17.4471	6.36917	6.03888	-9.5734	-11.346	-5.85667	-2.02085	32269.1	17758.7	2652.07	-18.7729	118.284	-0.492425	-12.2586
167		Galb1-4GlcNAcb1-6(Galb1-3)GalNAca-Sp8	-77.1623	-11.5863	9.82885	1.7507	10.2888	5.03852	-11.6333	-16.1763	-10.496	0.782375	-0.14185	3.45198	373.123	100.848	41.788	-2.9889	4.63322	0.43725	122.127	25.1755	12.6528	-2.5976	7.10858	13.1333	7.3224	9649.53	1172.93	27.5043	-17.3206	35604.3	14456.3	1569.91	3.41635	-9.42035	0.059275	5.41243
168		Galb1-4GlcNAcb1-6(Galb1-3)GalNAc-Sp14	354.343	-79.7183	2.21122	-1.87755	-1.4095	-3.12655	-4.43775	-5.8979	8.9198	-3.60135	0.343075	2.27698	-74.6143	60.2306	322.727	13.0886	0.009425	-0.313475	7.9845	-4.76425	32.5087	1.0265	8.23897	12.7021	8.2602	1204.18	152.12	1.4104	-9.76882	24502.7	5496.29	380.004	-6.81475	-31.3111	-4.42345	-8.64473
169	LacNAc	Galb1-4GlcNAcb-Sp0	-34.6661	26.0351	64.4415	4.4688	-8.6071	20.1205	-4.0708	8.6275	9.42325	-2.3787	2.58268	6.86795	-194.771	62.9933	57.0228	2.49182	-4.54902	2.16607	38.2289	12.5115	11.7212	0.733025	21.0348	15.7054	6.19717	1.34818	-12.8546	7.97867	-10.1736	23300.5	4041.95	945.707	-6.16188	-15.4516	-7.78072	3.34393
170	LacNAc	Galb1-4GlcNAcb-Sp8	332.293	-33.9739	4.02225	4.1291	-0.473875	2.33155	-0.939925	-0.5019	-7.33178	-6.01045	11.8005	-0.90895	95.3064	-12.1757	823.834	7.84402	1.44095	-11.0336	16.8158	-3.87895	1.0846	-1.87382	9.26795	9.09263	6.94815	-8.13235	1.15633	-8.08422	5.07065	21725.1	4929.93	932.137	0.2095	-34.2896	3.68222	-11.0096
171		Galb1-4GlcNAcb-Sp23	-5.9767	-16.1823	8.00055	6.7787	1.01853	3.58357	0.1335	-10.8248	6.36463	-0.31155	5.94392	8.96643	6.74332	-37.2343	390.786	2.3409	13.7072	-1.1752	9.6047	0.767375	-3.05017	-1.45742	8.3461	8.09535	6.79192	-6.10475	-18.5533	-1.5363	-6.51405	25315.4	5342.21	252.293	-9.3913	-10.9421	-5.15383	-7.62803
172	Lactose	Galb1-4Glcb-Sp0	1.98672	22.0367	15.9085	9.88737	7.0326	15.8115	-5.8935	-8.08872	17.5712	6.1855	2.43345	16.627	6.06647	6.87448	1444.25	9.61463	1.51898	-4.9688	-0.6125	-3.38598	3.72242	6.31665	7.6539	6.95225	8.28525	-4.55543	-13.6866	2.36357	-16.8215	2883.24	401.927	191.835	-0.479875	-24.1451	-5.33592	-4.4579
173	Lactose	Galb1-4Glcb-Sp8	17.6339	18.3328	42.6577	1.54472	5.04608	12.6402	-2.96668	2.1961	30.6688	2.19405	13.9205	9.79793	42.9768	-107.868	385.16	1.02365	2.68073	-16.0156	3.04095	4.26735	14.883	-0.65505	15.8492	10.9652	17.6585	1.04127	-4.0267	4.11325	-5.27058	7321.9	1284.72	279.31	-14.4898	-10.5295	1.85575	1.9622
174		GlcNAca1-3Galb1-4GlcNAcb-Sp8	-27.6421	-44.3006	3.43102	-3.56842	-4.73072	7.77345	37355	33134.2	12360.8	295.959	98.3886	8.48345	-76.341	-8.6007	71.1527	1.10462	-0.3755	-14.508	1.4494	-1.42293	1.72808	29408	19177.2	15314.7	2207.92	479.15	-2.5254	10.4476	1.9213	2069.17	2.70792	-1.75562	-10.8515	-26.7221	-4.1597	-11.2873
175		GlcNAca1-6Galb1-4GlcNAcb-Sp8	96.7994	11.8016	-0.0345	-3.86715	-2.4794	13.7417	-7.7114	61.4425	5.91178	5.61342	0.70545	3.65662	35.1367	0.560925	215.179	-7.98198	-5.59285	-12.8477	-1.53547	3.8765	14.6499	8987.85	4782.07	1469.27	167.658	7.25668	-22.1548	0.31295	0.21365	24005.7	5897.67	591.785	-12.2267	-18.3691	2.97897	-0.195575
176		GlcNAcb1-2Galb1-3GalNAca-Sp8	-69.4563	-12.7409	21.4232	0.7688	3.80702	-2.2898	1279.45	87.3564	18.3435	-3.60863	23.8509	-7.101	-130.462	241.538	162.238	0.43395	-2.94803	-11.9962	1.6893	-4.21428	8.35177	2.2509	8.2574	10.5577	9.26555	7.18575	-13.8993	-4.43088	-10.0382	257.724	5.327	4.40132	-10.6402	-3.3654	6.86385	0.840975
177	core 4	GlcNAcb1-6(GlcNAcb1-3)GalNAca-Sp8	-35.6792	-4.28358	24.0676	-1.32512	0.732125	6.97335	6.35468	14.7912	21.2243	1.80375	15.4082	2.79875	-63.9436	75.9594	204.485	-4.85867	4.08155	-5.27598	-0.457425	4.57745	13.7663	-5.75103	20.6709	13.9529	3.17472	-7.51375	-11.4869	-6.05008	-5.74173	87.5205	15.3845	1.20367	-4.63787	-23.1702	0.546725	-8.6208
178		GlcNAcb1-6(GlcNAcb1-3)GalNAca-Sp14	-16.6666	4.0194	2.57722	-0.75695	2.29165	-4.99625	-6.8247	-5.72752	2.59193	6.92858	8.5919	3.29783	35.162	20.3503	6.90455	11.3531	0.43445	-12.8403	37.708	9.59967	33.8752	-2.37913	1.5729	14.0183	13.2925	-15.0638	-17.8432	0.33645	-16.6915	7.62887	6.81117	9.80865	-20.2721	-30.1491	-0.546375	-14.7378
179		GlcNAcb1-6(GlcNAcb1-3)Galb1-4GlcNAcb-Sp8	51.8301	-78.1366	15.2632	-9.11672	-6.61495	-1.60067	4302.71	315.574	127.051	7.42853	6.53888	-1.95735	-99.9887	38.7491	32.8978	-7.34302	-2.14247	-13.4029	15.5688	-27.702	14.1401	5.4809	11.2032	5.01697	6.30525	2.46358	-38.87	-0.5334	-19.5586	31.6573	1.8125	5.76557	-32.3734	-76.5731	2.08138	-31.3069
180	core 3	GlcNAcb1-3GalNAca-Sp8	-25.2999	-14.1532	2.56922	5.5145	5.59777	1.48963	-6.2361	20.1804	3.35857	5.3331	1.75032	8.26395	-85.5049	362.676	131.271	-4.10645	6.21588	-7.20328	33.4386	-1.64357	7.0748	2.76115	5.52488	10.2923	12.345	-7.17575	-15.2079	0.332125	-10.2442	7.06147	2.38935	6.05945	-12.0154	-24.9974	3.04972	-16.1066
181	core 3	GlcNAcb1-3GalNAca-Sp14	19.0661	6.22082	20.7456	3.7698	4.37347	0.963675	5.3782	-7.94243	10.9342	-0.23295	-3.33783	6.4442	88.6672	-73.8099	76.4569	-3.96443	6.44997	11.6913	-13.8634	-1.71583	-2.9867	1.06167	3.6921	3.81645	10.4843	-13.8038	-3.02715	0.898525	-4.31632	5.34842	16.6212	6.26	-9.92377	-0.51505	13.5273	-3.58053
182		GlcNAcb1-3Galb-Sp8	10.3443	-1.7833	34.4786	4.00862	1.0798	-5.15115	4.74145	-4.05732	10.0431	3.5654	8.60285	2.13595	3.50975	-11.4669	25.032	-0.404575	-3.00478	-5.85808	1.95772	0.207575	-1.61982	0.136625	19.3897	11.6102	3.52435	-13.9837	-10.7878	-4.45925	-7.41765	6.11455	4.53358	6.08307	-15.0974	-18.555	-0.34305	-5.0986
183	GNLacNAc	GlcNAcb1-3Galb1-4GlcNAcb-Sp0	-3.3391	18.3323	41.7742	3.60985	-5.7695	11.0351	3304.89	157.491	48.715	4.43955	-3.4987	-0.69115	-21.4092	-157.559	39.1326	8.422	-3.82435	2.79415	-11.324	-3.73025	-5.4001	-2.2091	8.4064	4.2097	6.01745	-1.8098	-3.43332	6.7821	-1.47285	127.555	4.488	5.70503	-18.7188	-23.9835	4.38735	-10.9355
184	GNLacNAc	GlcNAcb1-3Galb1-4GlcNAcb-Sp8	-13.0181	4.58323	60.2644	1.1284	-0.79755	-2.24717	6574.38	422.043	165.998	-0.887025	4.90447	19.3918	-57.5217	-8.3444	-0.53705	7.82587	5.25915	2.00248	1.23173	0.465225	-10.0367	0.002925	8.89212	7.75165	7.30165	4.91835	-25.3541	-8.27465	-8.72925	32.5592	-0.49505	4.4136	-26.6086	-13.1319	-2.37728	-17.027
185	3'GN-Di-LacNAc	GlcNAcb1-3Galb1-4GlcNAcb1-3Galb1-4GlcNAcb-Sp0	-19.4025	2.82468	0.372175	0.386225	-5.79873	12.056	5716.84	514.018	56.0521	11.5116	2.41262	0.303475	-26.42	-89.61	61.6695	7.76408	4.27118	-13.2786	-6.67088	0.43185	14.2212	-0.071425	3.1776	9.30558	9.72448	-12.2974	-8.73348	3.43995	-11.897	1955.38	312.128	69.5964	-8.00847	-26.5327	6.62212	-19.3873
186	LNT-2	GlcNAcb1-3Galb1-4Glcb-Sp0	-9.55257	-16.2704	25.6236	0.12425	5.10895	2.17328	-8.96172	-7.88202	4.90925	13.3765	3.41647	5.0664	478.297	181.792	52.927	2.05858	-1.9425	-17.0027	8.69233	17.8397	30.043	0.046175	12.5081	7.34598	11.4877	-5.21095	0.038625	-5.62915	-0.5746	4.72155	5.46818	9.47888	-20.6318	-11.1917	-6.24945	-8.51518
187		GlcNAcb1-4-MDPLys	257.045	1.65283	15.6148	4.78065	1.73113	-0.0366	153.908	16.1905	-7.48015	-5.77937	11.1964	6.85673	30.8165	-59.5618	140.929	5.12002	11.4353	-9.82157	-9.694	-4.44727	-1.72552	-1.63395	5.35795	1.6417	2.9292	-6.11952	-28.1661	-7.01725	-9.0934	169.075	5.16025	5.40183	-6.42788	-17.0795	-3.83388	-15.4474
188		GlcNAcb1-6(GlcNAcb1-4)GalNAca-Sp8	-32.2896	-26.6305	26.8734	0.80865	0.616475	-2.39705	819.056	217.532	108.417	14.3559	0.099525	-4.06493	11.9436	54.8542	99.2587	2.70012	1.16778	-16.5075	-16.1806	-8.98433	-12.29	0.482225	9.93325	13.1339	-0.54905	-21.6952	-16.9669	-3.3899	-14.3118	74.6374	9.6386	1.59675	-16.2478	-42.7129	-4.40465	-12.7107
189		GlcNAcb1-4Galb1-4GlcNAcb-Sp8	-272.213	-61.8207	-22.0116	-5.24915	-3.11742	-14.5975	-11.7009	-0.0672	-10.4209	6.905	-17.4174	-29.2306	-116.489	-91.6461	46.377	-9.27605	-6.11037	-23.7124	-14.2462	-0.2018	4.02763	8155.09	5375.74	487.421	69.8585	-18.9926	-6.64695	-14.7442	-18.5991	1.3291	4.83985	-2.44982	-13.9084	-45.3854	8.54103	-16.415
190	chitohexaose	GlcNAcb1-4GlcNAcb1-4GlcNAcb1-4GlcNAcb1-4GlcNAcb1-4GlcNAcb1-Sp8	-21.7648	-19.8172	32.8164	7.08005	6.40468	9.6264	30034.4	23110.5	12190.4	4592.44	1786.73	473.974	-62.7836	38.0608	165.236	3.95063	8.32602	-5.2866	11.4136	27.4106	11.0597	4.53555	6.83075	1.58732	4.22562	4903.53	269.225	-8.43445	-6.86207	2240.31	11.0345	13.9264	2.67182	-24.207	-3.434	4.33412
191	chitopentaose	GlcNAcb1-4GlcNAcb1-4GlcNAcb1-4GlcNAcb1-4GlcNAcb1-Sp8	-109.781	127.492	13.4052	-6.3194	28.2702	10.904	25495.1	29027	21227.9	7047.7	1697.04	604.245	-98.2654	-33.17	573.675	-0.60695	-3.64457	-8.08528	7.72547	6.43708	11.62	-0.9803	8.66853	17.203	5.8639	5571.45	132.708	-6.02902	-22.5316	5289.28	2.82063	9.50428	-20.6822	-20.4365	-6.9793	-4.77043
192	chitotriose	GlcNAcb1-4GlcNAcb1-4GlcNAcb-Sp8	-44.5395	-29.255	6.98273	0.530525	2.12923	3.6148	36102.1	32111.5	14475.7	1860.47	697.136	197.489	407.852	396.222	79.3127	13.1536	-6.21723	-6.65077	70.6143	9.9014	31.2856	2.85905	8.71858	12.6357	6.07583	3171.6	95.1448	-12.6862	-14.6448	1969.59	6.33815	3.85787	-10.9002	-37.7679	-2.5428	-4.40918
193	core 6	GlcNAcb1-6GalNAca-Sp8	-101.584	-83.1568	16.26	-10.5872	-2.35135	-9.53025	5289.67	505.956	634.92	-8.72853	-0.51025	-6.34422	-24.803	-93.737	251.332	4.3996	-0.6054	-14.5174	-4.4242	-0.815525	19.481	-2.50182	10.3316	0.4947	14.7852	10.313	-9.4784	-12.188	-18.9492	2458.41	10.4246	1.59287	-16.7232	-37.3572	-5.52815	-18.0406
194	core 6	GlcNAcb1-6GalNAca-Sp14	-55.9138	-17.4348	42.6776	-6.15302	-4.49342	2.13305	-14.236	23.1936	5.38532	-5.29018	1.33415	11.6682	-128.845	94.6582	65.2721	0.0973	-4.5565	-7.01322	-5.66653	18.4093	49.7289	-0.826925	8.3524	7.4851	10.7984	-7.20048	-10.2261	-6.3817	-0.09325	12.4907	10.1695	0.17765	-1.81845	-5.67997	-0.826275	-8.711
195		GlcNAcb1-6Galb1-4GlcNAcb-Sp8	-108.291	-40.6157	-2.6667	4.71165	2.82657	5.82013	35529	9618.47	4672.31	21.5991	6.67398	-4.77167	-22.5293	-56.0892	354.175	-3.7734	-10.4632	-7.32518	20.2737	1.21575	17.4294	-5.19428	8.38905	1.5322	9.07552	37.4198	-6.5929	-13.1822	1.74058	8015.76	21.2684	9.92588	-7.7717	-35.7446	-9.12913	-0.652925
196	maltose-b	Glca1-4Glcb-Sp8	-84.8116	-16.8436	71.6554	3.10102	4.02187	8.11348	-11.7724	30.9791	2.10277	4.39857	2.22435	24.987	7.29962	174.187	85.0704	11.2782	6.30217	-0.3481	41.5731	15.3171	25.0621	1.67263	8.89252	13.7931	9.86795	-6.3572	-4.19738	-5.71168	-12.9939	40.1343	8.8163	11.6533	7.70915	-18.7516	-1.20977	-2.9215
197	maltose-a	Glca1-4Glca-Sp8	459.797	2.13965	65.0215	-1.1106	0.090975	-3.13952	-4.1237	30.8197	5.77872	-2.9786	11.8073	15.8634	-10.1378	-88.2595	705.814	-4.53692	0.71785	-9.97113	7.85833	-3.78067	10.3844	0.32845	12.3649	11.7268	9.14423	4.65492	6.6616	-2.15818	-2.79322	21.9815	2.9362	-0.0222	-4.81178	-8.7558	-0.463425	-6.73903
198	isomaltose	Glca1-6Glca1-6Glcb-Sp8	32.3686	-3.20702	52.4619	10.3511	12.6922	6.49367	3.67037	3.1562	16.511	4.70392	1.9836	4.63135	-0.042325	-139.753	488.999	8.66538	1.53115	1.49925	9.8569	3.14755	20.6931	1.00288	6.74245	14.1929	18.2494	1.8282	-4.68998	-2.43477	-3.48753	6.5699	12.3186	15.4813	-3.083	-4.24262	2.52443	1.79685
199	cellobiose	Glcb1-4Glcb-Sp8	63.1602	-1.50477	56.1023	0.821225	3.05717	7.94412	-0.236325	12.8311	12.5805	1.14695	0.54635	0.49955	220.458	-143.325	1524.76	0.429625	8.45998	13.3323	16.6724	9.59105	4.2344	1.87675	22.1934	5.29412	0.274725	-4.45935	-15.059	7.1045	5.728	7.38475	2.72602	8.2194	6.9208	-13.7241	0.733825	-8.7246
200		Glcb1-6Glcb-Sp8	17.9368	-6.79072	78.6995	-2.298	5.79457	7.68777	13.9403	-3.57615	6.52803	1.41683	8.42635	16.1727	4.72123	-83.7998	379.934	4.16218	2.97488	-7.3741	3.46857	7.59197	1.15098	-0.757325	7.74105	8.1649	9.6063	8.05867	-0.345625	0.3071	8.32827	6.79953	11.0465	12.6241	-2.6177	-8.81857	-0.14145	-3.70577
201		G-ol-Sp8	-46.3896	91.8573	63.9699	5.16062	3.92595	24.1068	-4.93503	-14.1138	7.5413	0.03135	-8.6233	5.35122	-68.9809	272.361	312	6.70585	-1.10248	0.252075	26.4532	14.4473	33.8835	4.0342	9.60163	9.23022	4.4054	12.7592	-2.1956	4.45552	-9.48705	14.022	14.5863	12.1388	-9.17737	-51.7201	0.000725	0.327875
202	GlcA-a	GlcAa-Sp8	128.47	154.953	111.144	4.7075	1.89342	1.58605	-22.6213	-6.93927	15.3235	6.33202	-2.18643	4.32868	-88.2301	192.087	308.395	4.9016	-1.50713	-8.54595	23.6909	11.4499	51.3292	-4.74493	3.5544	3.13663	5.0962	-46.9399	-29.7708	-0.05815	-3.62492	11.0345	14.7125	8.89813	-14.2761	-49.7592	-4.58888	-12.1681
203		GlcAb-Sp8	-12.228	15.2147	145.792	51.3512	18.8435	61.6503	13.7887	58.3822	115.134	14.1023	5.23475	50.4197	-117.371	183.003	672.907	59.1934	18.4061	-1.48133	68.934	15.2514	52.3343	21.8506	47.6698	56.8323	60.8246	-1.56123	3.97488	5.1007	0.251975	83.5614	82.9834	121.658	1.67847	-18.3751	5.14088	-0.789675
204		GlcAb1-3Galb-Sp8	15.4506	-59.7987	33.8946	16.11	4.9726	8.5453	-2.3251	-6.0278	1.38505	0.253275	5.4271	8.31075	6.69155	73.2084	368.259	-5.11053	-1.82315	4.06925	7.64637	-3.32775	15.0625	0.1599	18.6256	-0.221625	7.8883	-15.3957	-25.0489	-1.1047	-22.4434	4.78017	6.24653	9.7383	-19.6746	3.37255	1.25132	6.59553
205		GlcAb1-6Galb-Sp8	77.5184	-33.2572	78.9846	11.0787	6.37898	34.9994	-16.3584	31.1854	27.4339	17.8374	2.94165	13.1112	-12.4907	30.8947	407.338	-5.69035	-3.55857	-5.84127	43.3489	2.95357	13.2468	0.45215	21.046	1.20092	9.395	-14.7742	-24.7124	1.23155	-1.52645	15.8331	5.3777	7.84233	-17.8913	-37.2621	2.53108	2.13775
206	3'-KDNLec	KDNa2-3Galb1-3GlcNAcb-Sp0	-78.4525	78.5359	38.8102	-1.15715	-1.13835	4.44603	-13.1573	-7.25815	-2.33578	-2.62608	4.20315	-5.19095	205.91	132.126	156.918	-9.2857	-2.04425	-10.1993	3.39045	-4.13195	7.93147	-0.547025	5.96122	12.3952	6.82817	-43.6463	-33.9893	-17.113	-15.7742	1.9395	2.03005	13.3958	-38.6451	-78.9618	26.6757	-29.1116
207	3'KDNLacNAc	KDNa2-3Galb1-4GlcNAcb-Sp0	-14.486	-37.4237	27.6368	9.53	9.41188	0.566	3.80593	16.3764	10.7153	6.6565	4.66378	7.52228	-7.5417	238.768	34.3715	8.80017	2.47675	-8.30555	6646.13	2787.96	93.7139	-1.03705	12.3387	9.32897	8.84875	-4.69875	-12.7426	-5.33478	-7.88842	28.6064	9.09635	6.4295	-27.0184	-11.0066	1.48313	-4.62462
208	ManD1arm	Mana1-2Mana1-2Mana1-3Mana-Sp9	37383.2	35733	23673.1	1734.33	1278.31	151.626	10.7124	0.240475	4.23658	-3.9493	3.29987	1.46877	-1.70765	-86.8353	39.7806	10.0133	5.0118	-0.2912	0.8173	-4.08802	-4.857	-3.60567	5.0871	2.75427	15.7288	-10.1512	-12.9915	-5.0539	-7.63018	4.25887	9.665	14.1291	141.607	-9.40015	-1.14825	-10.2479
209	ManD2D3arm	Mana1-2Mana1-6(Mana1-2Mana1-3)Mana-Sp9	35882.2	37007.8	34350.2	7542.78	7143.29	1349.14	32.6312	0.066325	2.84822	15.8822	-3.00967	2.32993	21.3621	2.25532	37.9777	2.2928	1.5693	3.2286	0.86425	-0.3799	-6.42175	1.90667	7.65565	7.75295	4.22377	-15.8321	-11.678	7.51105	-1.1703	7.641	0.5562	-0.7988	2743.39	396.817	7.7686	-16.5289
210	ManDx arm	Mana1-2Mana1-3Mana-Sp9	35979.1	39112.3	31673.1	4014.35	3266.63	350.609	-9.53395	-5.4632	12.4317	-4.64913	1.87565	11.0409	-6.09495	-87.8552	29.9712	-2.85023	-3.74027	-20.6793	-1.31637	0.80525	5.0943	-0.6905	1.33092	5.77395	8.1406	0.7303	-12.1041	3.98915	-7.5407	18.9286	6.62872	6.45345	1007.24	-0.143125	3.72875	-16.8371
211	Man7D2	Mana1-6(Mana1-2Mana1-3)Mana1-6(Mana1-2Mana1-3)Manb1-4GlcNAcb1-4GlcNAcb-Sp12	36146.1	39418.8	28130.5	3931.35	4364.06	596.917	23.0672	6.46525	0.83645	-2.38847	0.645925	6.442	1706.71	4630.62	333.591	47.712	27.551	-8.03378	5.8426	5.35387	-8.51908	-0.36725	10.7067	7.17852	6.78022	2.20485	-27.9507	1.93915	-4.66345	7.86272	14.4481	7.55153	370.69	-13.4776	-0.144625	-3.36
212	Man8	Mana1-2Mana1-6(Mana1-3)Mana1-6(Mana1-2Mana1-2Mana1-3)Manb1-4GlcNAcb1-4GlcNAcb-Sp12	55881.7	36617.6	41125.4	12297.3	3746.42	579.33	-23.3098	18.0939	-13.5928	2.80605	-13.606	-12.8971	1003.08	648.085	868.54	1.78663	-13.367	-20.1608	-11.1777	-2.89337	11.9552	-1.77788	3.19598	12.7583	7.70308	-14.2014	-24.0099	3.22797	-13.3797	-0.907275	18.9115	20.4018	210.211	-33.1275	-4.729	-27.5007
213	Man9	Mana1-2Mana1-6(Mana1-2Mana1-3)Mana1-6(Mana1-2Mana1-2Mana1-3)Manb1-4GlcNAcb1-4GlcNAcb-Sp12	27684.3	26458.2	18115.5	2569.19	2529.8	302.804	3.12458	-5.85803	50.1706	14.1599	2.27055	54.3958	49.8765	325.24	634.276	16.4	23.978	4.85565	2.3188	42.3144	13.4957	5.02262	46.1383	15.3568	17.3213	-16.283	2.43575	3.3414	1.17352	51.4408	49.722	59.9831	40.9256	-4.23555	6.0303	9.65702
214	ManT	Mana1-6(Mana1-3)Mana-Sp9	39736.1	29565.6	37576.2	14138	491.514	759.717	-30.8923	-18.6453	-1.01622	-10.6885	-3.1118	-0.8882	-159.831	21.7811	86.5	-0.26245	-10.3899	-11.6938	33.8956	19.8051	30.0322	-4.29273	13.4092	8.68437	5.1256	-14.8904	6.35143	4.3073	-7.28653	23.9269	21.1048	11.9116	595.151	10.0878	-11.0996	-7.1565
215	Man	Mana1-2Mana1-2Mana1-6(Mana1-3)Mana-Sp9	34121.1	33882.2	31017.7	8166.97	8673.48	1169.44	2.72622	-8.8946	20.4163	-9.57825	7.43683	3.94507	33.0532	-22.2837	6.87918	-0.704425	4.89625	-6.5442	92.9518	19.2124	97.6367	5.08028	7.30317	16.715	14.5576	-17.0611	-16.8849	3.55573	-3.35205	10.8583	24.4246	25.4255	1992.15	425.198	6.99707	-10.3061
216	Man6-I	Mana1-6(Mana1-3)Mana1-6(Mana1-2Mana1-3)Manb1-4GlcNAcb1-4GlcNAcb-Sp12	41082.4	47253.4	48820.9	8982.16	6147.92	553.582	7.456	97.9376	112.039	-5.00437	67.8775	111.191	168.924	418.998	740.122	12.1753	69.8035	57.7113	62.4284	33.2282	62.3436	55.4535	95.3713	129.162	89.6608	71.2787	22.1678	90.8089	30.6453	337.884	220.714	122.7	141.859	59.6573	39.8343	65.7613
217	Man5	Mana1-6(Mana1-3)Mana1-6(Mana1-3)Manb1-4GlcNAcb1-4GlcNAcb-Sp12	38826	28615.8	50032.3	5784.36	5983.17	527.352	-20.2233	4.13477	8.25577	-8.3046	0.570125	9.11078	-131.706	677.957	178.167	3.6448	1.5855	-6.36	75.7113	56.2246	27.8573	-2.40867	3.41867	15.5392	4.26495	-2.37455	-12.6088	0.2666	-5.69375	19.1063	13.4963	8.7802	19.0465	-15.1037	2.49013	-3.05513
218	Man1	Manb1-4GlcNAcb-Sp0	-129.531	-57.9804	20.6568	-0.2076	4.08477	-2.59575	-45.8214	-7.85653	23.9815	0.201975	1.56343	5.81397	-237.733	-20.6946	263.2	-7.1328	-7.32625	-0.41975	12.2033	5.5213	24.3323	-3.99958	3.2392	5.27787	5.33495	-10.1764	-20.7298	-13.8231	-3.54552	13.7856	8.36428	5.16085	-10.814	-40.2767	-5.53242	-13.7236
219	3'SLacNAc-LeX	Neu5Aca2-3Galb1-4GlcNAcb1-3Galb1-4(Fuca1-3)GlcNAcb-Sp0	-88.6603	-38.5941	3.32395	-6.9632	-13.9388	-1.15075	-22.3247	4.30762	-3.66185	-2.53342	0.98705	-1.30795	-137.963	94.6182	77.195	-8.8536	-5.76105	-12.0247	2129.34	725.787	31.5162	-4.37387	6.43775	6.91925	7.46722	-13.2718	-22.6576	-8.00142	-2.4205	8.39895	6.45245	8.1997	-7.72262	-41.8987	0.6197	-10.8816
220		(3S)Galb1-4(Fuca1-3)(6S)GlcNAcb-Sp8	273.676	-24.8245	74.6198	5.06898	0.261425	8.9486	-12.5582	12.5658	-3.1094	0.361575	0.523075	-5.42422	13.4819	-24.4031	3179.36	10.0788	-0.887825	-8.9934	8211.52	6087.57	1814.06	1.25948	20.1561	7.18733	4.40417	207.421	14.026	-1.48208	-4.3978	6.9174	-3.24105	14.0703	-4.96223	-11.5596	2.88745	-1.21435
221	BG-H1 (sulfated)	Fuca1-2(6S)Galb1-4GlcNAcb-Sp0	0.53665	-1.50503	17.7334	3.35632	-0.9846	1.6725	-3.7838	1.08827	9.11665	1.3415	4.60787	0.538425	6582.58	5551.12	135.02	-0.55075	-0.605875	-1.1453	1.1876	-3.32302	-11.1987	-3.61625	7.09717	11.8312	12.1892	-2.84267	-2.11657	-6.99528	-0.81105	10958.9	2196.8	155.335	-17.7489	-6.3754	7.7675	-3.71632
222	BG-H1 (sulfated)	Fuca1-2Galb1-4(6S)GlcNAcb-Sp8	87.0055	29.3866	5.96125	6.8542	-2.01203	-1.8623	-3.6542	4.39573	14.8829	6.6607	-0.743675	3.754	357.788	-102.209	426.936	7.82205	1.23153	-4.78575	-2.89788	4.56358	-4.27705	1.39205	17.057	13.4613	11.7414	30.0328	-21.2469	4.25033	-8.63293	48.9241	13.0032	4.24537	-3.46792	-20.9525	-0.351625	-0.00165
223	BG-H1 (di-sulfated)	Fuca1-2(6S)Galb1-4(6S)Glcb-Sp0	380.203	43.6388	77.0499	1.2451	8.01052	2.17115	3.9252	4.87115	-3.04615	-0.808575	0.37335	9.69128	1838.96	875.829	417.96	8.68917	8.96045	5.28308	-5.73345	1.87962	0.710525	0.251175	7.45278	14.2565	8.96103	8.19975	1.91202	-1.23003	1.19373	182.643	69.5	25.5297	-14.0396	-2.36085	-0.98425	-7.4703
224	3'STF	Neu5Aca2-3Galb1-3GalNAca-Sp8	-50.6319	-43.4611	-6.28795	1.02872	-5.35987	-0.753225	-25.1392	-20.2935	-6.0549	-8.17525	-3.1982	-10.8415	-129.422	178.26	13.9253	-4.63597	-5.98338	-10.1844	2.69045	4.22125	5.7172	18.8523	21.2825	7.17458	-0.13015	-16.2968	-33.7707	-8.73945	-17.2292	14.2339	2.64025	6.74465	-17.8404	-55.9079	-10.93	-27.8764
225	3'STF	Neu5Aca2-3Galb1-3GalNAca-Sp14	-48.7594	-63.6984	0.6654	-2.5372	-5.09583	-4.33392	-37.8689	-10.2032	1.97175	-2.87975	-4.83832	3.2094	-88.3105	-6.5818	593.825	-18.4698	17.8958	-15.0872	12.2829	19.782	13.6999	5.49287	9.3063	5.09875	4.93838	-64.3122	-27.6176	-10.5145	-33.5625	3.86355	4.60915	-1.59523	-44.7559	-60.6121	-20.8398	-39.5119
226	GQ2	GalNAcb1-4(Neu5Aca2-8Neu5Aca2-8Neu5Aca2-8Neu5Aca2-3)Galb1-4Glcb-Sp0	-67.7126	-15.9689	95.9293	12.3849	7.45838	-3.791	-51.8883	-9.55208	-2.60097	-12.0319	-4.68247	2.9998	30.4044	542.347	299.206	3.1198	-0.9258	-14.8133	32.9531	-0.340825	27.5533	4457.39	741.058	9.0518	13.8399	-7.11673	-29.0595	6.15897	-7.37495	12.1794	8.71793	10.9421	-23.9858	-16.1965	13.2777	-16.1028
227	GT2	GalNAcb1-4(Neu5Aca2-8Neu5Aca2-8Neu5Aca2-3)Galb1-4Glcb-Sp0	-20.9145	-38.364	69.3017	10.5747	19.8249	21.1765	-21.7829	36.5673	33.8996	4.02822	5.35785	15.5225	-200.271	359.484	55.3722	4.3403	3.87732	-1.1027	30.9993	-2.02282	46.8616	5173.14	1310.53	135.989	15.4143	-28.5397	-24.4472	3.22923	-20.717	11.3242	16.7846	10.2117	-44.9156	13.1004	3.419	-2.2835
228	GT3	Neu5Aca2-8Neu5Aca2-8Neu5Aca2-3Galb1-4Glcb-Sp0	-56.8729	-81.5425	158.022	-3.6937	-5.9631	-0.017075	-17.8254	-11.1539	5.9301	6.8303	-1.0656	10.4063	85.9724	88.6971	152.842	9.54798	-6.55645	-17.6997	2628.5	1998.15	34.8095	-0.73715	11.6549	4.27015	14.4913	-17.6606	-38.0969	-11.4261	-16.5767	6.02443	-0.283075	10.7202	-17.7804	-66.0916	-2.4679	-21.1347
229	GD2	GalNAcb1-4(Neu5Aca2-8Neu5Aca2-3)Galb1-4Glcb-Sp0	-42.6439	-42.0345	173.864	-8.99488	-4.07873	-4.88495	-13.6245	6.5713	-7.51185	-5.8032	1.77927	-2.27505	-124.141	1493.38	101.747	-5.5866	-4.09092	-12.364	11.4837	-11.4062	-4.20022	7334.19	2883.46	240.635	8.48367	-43.1136	-47.1261	-33.5178	-25.4448	3.8806	1.16828	14.8139	-58.6238	-95.0791	-7.10137	-40.6602
230		Neu5Aca2-8Neu5Aca2-8Neu5Aca-Sp8	-46.1572	-47.3113	19.812	2.894	-8.34653	-1.21417	-12.4829	13.5993	7.29503	-5.9708	1.17068	0.62835	1178.19	47.5165	63.4964	-0.14175	-1.71422	-16.2919	4.99282	-5.92342	-2.376	-2.87625	4.65133	9.48635	7.69897	-11.8672	-17.4814	-3.8574	-16.4556	11.9469	5.00125	6.86653	-19.7729	-44.8952	-6.0282	-13.2027
231	SLeX(6'Su)	Neu5Aca2-3(6S)Galb1-4(Fuca1-3)GlcNAcb-Sp8	6.98368	-13.7317	131.054	5.4378	2.37762	0.95465	0.664375	-4.54605	-4.24435	-1.6401	-0.6414	-3.66158	214.689	-40.8838	61.0439	-7.03578	6.42915	-1.77748	-7.13572	12.9096	-12.4271	0.356225	5.18573	8.4003	0.2676	-17.6154	-18.8681	-2.83055	-16.3787	1.73145	1.96232	6.1589	-13.2713	-11.0741	-5.58723	-7.12198
232	CT/Sda	GalNAcb1-4(Neu5Aca2-3)Galb1-4GlcNAcb-Sp0	-2.89797	-11.8115	47.6821	5.72565	-2.10062	-6.36257	3.4605	-10.12	-2.55662	-3.8972	-0.443425	-1.8489	-33.5509	-31.8668	57.874	1.15415	-1.71328	-4.51967	2.50735	-2.67103	-17.3082	24.605	4.09598	13.5624	6.52645	-19.3294	-31.2613	6.4855	-16.7651	10.8375	4.13337	4.15988	-27.4502	-16.0903	-1.62898	-10.2504
233	CT/Sda	GalNAcb1-4(Neu5Aca2-3)Galb1-4GlcNAcb-Sp8	51.7916	-12.4152	19.3052	0.688475	-4.18497	-1.7673	-4.26135	-16.1013	-2.18375	11.032	-3.6815	15.6983	48.9394	-54.8881	58.5852	1.50505	-2.11885	-10.5215	-1.00655	4.76988	-0.515925	17.4023	8.1583	10.6646	1.312	-4.3455	-12.8374	-0.567575	-8.18418	9.49283	-1.9177	6.91825	-36.7378	-27.1457	-4.34825	-11.7953
234	GM2	GalNAcb1-4(Neu5Aca2-3)Galb1-4Glcb-Sp0	-3.28142	-8.39132	28.5979	2.77312	6.10127	7.95853	-7.67398	-2.56663	-7.14288	9.19968	-2.72368	0.27995	-2.9678	-18.2137	-0.46845	-4.22475	-5.96208	-20.6528	1.36708	-5.66883	-15.8946	919.28	62.4982	7.7818	5.58925	-14.5762	-39.1665	4.02975	-5.56023	3.21335	11.5879	3.69335	-36.4444	-21.7276	4.14285	-8.18313
235	GD1a	Neu5Aca2-3Galb1-3GalNAcb1-4(Neu5Aca2-3)Galb1-4Glcb-Sp0	-104.396	-41.0122	-18.0989	1.25683	-0.9378	-8.55105	12.6962	5.79715	-1.37095	16.0083	-4.77912	-5.82185	145.423	-80.4138	496.133	-13.4283	-5.31268	3.26842	-2.23113	9.11808	-7.36992	-3.0022	1.15512	8.01755	16.1658	-7.42952	-28.8999	16.5472	-15.187	3.07015	8.26447	2.28627	-22.4416	-19.2181	19.6696	0.8697
236	diSialyl-Tn	Neu5Aca2-6(Neu5Aca2-3)GalNAca-Sp8	196.434	-57.1387	-2.13405	4.00248	-10.7063	-9.21045	-19.8463	-10.3205	13.2071	-11.0848	-8.20595	2.99855	-76.368	-65.5708	28.6419	-4.3207	-10.3518	-12.8449	-15.5554	-12.7373	-4.38325	-4.49818	12.3501	13.3185	10.2407	-20.2003	-28.1239	3.26545	-10.8068	8.31325	1.92357	12.4727	-12.5487	-29.409	1.65452	-10.5506
237	3'SGalNAc	Neu5Aca2-3GalNAca-Sp8	-58.8733	8.74215	-12.9876	-14.699	-1.53705	-16.1175	-7.89573	-17.3709	-15.5878	-5.08742	-8.89065	-6.72142	-137.145	3.85722	68.0381	-21.0713	-4.72225	-16.6172	-19.4211	-5.748	-2.68402	-6.83563	6.29683	8.536	-3.3718	-22.2578	-23.8152	-7.67672	-16.3053	18.0416	1.06917	12.6565	-15.503	-36.5966	-10.4967	-26.3098
238	3'SLDN	Neu5Aca2-3GalNAcb1-4GlcNAcb-Sp0	-97.1894	-34.9595	-4.98713	-1.08455	-3.43998	1.8273	-8.12502	-12.9827	-15.477	1.30828	-3.57198	-6.0479	69.2233	81.5678	168.275	-7.7244	-1.87612	-12.4959	-7.63755	-4.68628	-1.99345	-6.22635	6.0785	7.10227	6.2598	-18.5756	-27.5762	-4.64733	-11.3214	6.14307	6.9323	-0.07395	-20.1527	-39.5732	28.8726	-12.0004
239	3'SLeC(6Su)	Neu5Aca2-3Galb1-3(6S)GlcNAc-Sp8	118.602	-10.0811	20.5849	22.8098	4.19808	12.4851	-27.3228	9.59917	16.1272	1.11977	7.2059	13.2695	-14.7146	31.9352	307.858	24.2306	2.30135	9.2014	16.0719	62.5221	75.575	8.5697	22.6972	29.7261	28.6451	-23.2385	-18.7292	3.28138	-8.09835	54.3985	46.6705	45.0971	-9.177	-26.5583	7.54183	9.13645
240	SLeA	Neu5Aca2-3Galb1-3( Fuca1-4)GlcNAcb-Sp8	-52.9228	-48.6413	-4.5899	7.29645	-9.46218	-4.31045	-9.6541	-21.7635	-2.63568	-13.4898	-2.79435	13.7567	-66.8186	1103.55	90.8371	6.0259	-8.41353	-4.58195	15.6219	9.78345	9.21862	0.765925	6.93782	-6.17725	13.7628	-18.7629	-12.4906	-2.07405	1.03305	6.0466	6.5867	14.6538	-21.5842	-24.9649	5.73955	-11.304
241	SLeA-LeX	Neu5Aca2-3Galb1-3(Fuca1-4)GlcNAcb1-3Galb1-4(Fuca1-3)GlcNAcb-Sp0	311.047	336.915	191.519	5.25353	-4.25625	-1.91383	-16.713	-9.49175	-6.36242	-3.55583	-3.49077	-0.486675	-106.1	-56.4982	467.572	-0.757275	3.13632	-13.5979	0.6133	-3.2741	8.69383	41.7695	24.5294	36.1559	8.75795	-31.1006	-18.8235	-8.65755	-28.8524	33.7121	12.9853	3.76015	-33.2462	-37.3801	-14.138	-4.08627
242		Neu5Aca2-3Galb1-4(Neu5Aca2-3Galb1-3)GlcNAcb-Sp8	-18.4459	-10.557	-11.9006	-7.59905	-0.51365	-4.5364	-13.4998	-9.32203	2.44663	-5.2023	-5.21958	11.1842	0.31315	204.906	-8.0556	-5.68615	9.61898	-3.5795	12.9881	-6.1787	10.9974	-0.68875	5.81915	-1.00527	3.4499	-28.2555	-24.4706	-8.57205	-20.2216	10.636	6.83942	7.45928	-44.1401	-35.7287	-6.27583	1.85785
243	3'STF(6Su)	Neu5Aca2-3Galb1-3(6S)GalNAca-Sp8	682.29	-16.892	34.075	-1.79935	9.70007	-2.366	-1.9864	5.60205	-4.6133	0.5414	6.20718	-0.83655	42.1755	-38.4981	2828.66	4.02395	-1.75058	-3.82263	6.83768	-4.30135	-6.3889	-4.74598	2.23957	15.0775	3.0712	-10.9883	-1.8502	1.80997	-2.45528	4.74583	4.73213	7.818	-1.525	-22.0268	-2.63328	-8.73695
244	3'6-diSialyl-TF	Neu5Aca2-6(Neu5Aca2-3Galb1-3)GalNAca-Sp8	-24.5505	15.9958	17.9477	0.861025	1.809	-5.00357	-1.20388	-7.45845	-1.83037	-2.32675	-1.44447	12.4956	73.0146	-141.065	134.937	-5.0359	7.3043	3.53078	2.09592	-10.2878	-4.18042	-4.4546	2.8109	3.34065	5.734	-12.2737	-2.81	-5.64548	5.13715	4.93275	8.30135	10.5938	-12.195	-15.9215	-5.58738	-10.8464
245	3'6-diSialyl-TF	Neu5Aca2-6(Neu5Aca2-3Galb1-3)GalNAca-Sp14	2763.2	820.304	985.425	7.54852	2.68968	11.484	-0.13185	9.99648	4.79325	0.944125	-3.1062	9.70753	-7.65855	-144.004	2311.75	4.58755	8.09675	-5.96443	3.3348	11.7463	-2.20985	2.8101	14.5666	7.2929	19.8877	-7.67353	-15.0221	4.51735	10.2522	48.9179	9.17627	7.0416	0.65355	-4.79413	-6.06795	-4.8443
246	GM3-di	Neu5Aca2-3Galb-Sp8	-12.4717	9.533	5.74638	2.55722	3.08422	7.51927	4.15577	16.3525	0.6042	-3.1639	14.5834	18.8907	43.9886	-179.935	45.321	0.820875	-3.92855	-6.11133	17.5227	5.08918	-9.86913	2.68212	13.8773	2.78413	5.63968	1.78115	-10.2207	5.37397	-2.86332	21.3611	3.92282	7.17095	-11.4417	-18.493	-3.11787	-9.47652
247	SSEA-4	Neu5Aca2-3Galb1-3GalNAcb1-3Gala1-4Galb1-4Glcb-Sp0	364.167	-9.857	4.6926	22.2186	11.4446	3.57557	8.9785	5.15912	8.0163	-0.70995	6.29922	10.4271	-62.3905	150.782	164.524	17.9225	-2.68967	-6.37458	13.0362	7.94793	11.1008	2.7263	7.68562	9.88385	12.7675	-13.9519	-7.6669	1.3786	-10.8383	12.9529	20.9173	22.2027	-10.4517	-19.6289	-13.9413	-6.08975
248	LSTa-like	Neu5Aca2-3Galb1-3GlcNAcb1-3Galb1-4GlcNAcb-Sp0	19.9509	-10.0484	-3.53503	-2.0489	-3.20638	-2.90542	-13.864	14.6076	0.077875	-10.2988	3.1023	-8.19763	-86.7642	147.961	-20.3746	-9.96113	-2.42792	-1.53708	16.7704	-2.9272	27.0125	-0.8103	0.7566	6.65675	7.08175	-34.4009	-7.72235	-0.3195	-2.18115	22.7547	3.22658	1.93022	-22.4733	-30.1789	-5.72842	-26.4881
249	BG-H6 (sulfated)	Fuca1-2(6S)Galb1-4Glcb-Sp0	-37.3039	3.89017	20.8514	0.4212	10.7255	3.00588	-3.86407	-14.5236	1.9703	-2.13258	7.03388	6.27828	3149.65	7685.17	222.271	7.23722	-4.73035	-10.8096	-2.85338	9.45093	29.9035	-2.05812	4.25865	-0.22865	12.8193	-7.88533	-6.39195	-8.2337	5.95377	482.93	80.6386	31.7943	-11.0247	-2.11772	-5.25417	2.57493
250	3'SLeC	Neu5Aca2-3Galb1-3GlcNAcb-Sp0	-32.1711	-4.56802	-1.95242	6.31135	15.8488	-2.42007	15.5651	-3.7202	-12.0781	2.44172	-0.74565	5.95097	-92.5895	453.545	30.8481	2.35615	5.21538	-21.4402	-4.6559	19.3023	1.39325	0.720825	9.81183	5.654	8.71393	1.15545	10.4303	2.6682	-10.5577	9.1953	9.26083	10.9925	-35.8961	-24.4016	12.2177	-10.5355
251	3'SLeC	Neu5Aca2-3Galb1-3GlcNAcb-Sp8	-45.8685	-9.70575	6.78647	-0.22205	0.508225	-6.16067	-25.0396	-11.7757	-5.85335	-0.481825	-13.7658	-2.64735	-100.507	77.6458	581.949	-2.77308	-2.88425	-12.0775	30.2014	3.23777	52.4276	-0.68285	8.81203	5.35097	9.59638	-28.3261	-25.194	-5.2993	-25.4412	4.642	6.09935	2.02132	-18.0144	-39.9608	-10.8965	-7.3932
252	3'SLacNAc(6Su)	Neu5Aca2-3Galb1-4(6S)GlcNAcb-Sp8	18.6965	-62.8145	-13.5486	-0.2267	11.6123	-6.08867	-18.0509	-14.8699	-11.2033	-6.6866	-1.85567	0.635125	435.098	142.777	139.766	-3.75993	-7.18755	-5.31793	4152.48	1694.56	41.4235	-1.99487	10.0161	5.19102	4.94082	-29.2795	-39.3855	-17.8891	-13.7774	17.4942	10.9097	5.65045	-26.2555	-67.5256	-11.5655	-38.1032
253	SLeX(6Su)	Neu5Aca2-3Galb1-4(Fuca1-3)(6S)GlcNAcb-Sp8	-6.74762	17.7334	9.3097	2.22928	0.305425	-0.1901	24.4621	6.10352	-0.380875	-5.35468	-0.9301	-6.97633	91.3255	53.5926	70.1548	15.3252	-7.81955	-5.56867	46.2295	-1.85035	20.7984	3.55325	5.47025	6.3759	5.98532	-14.2496	-28.8128	-9.47705	-8.93322	22.565	8.33945	9.9815	-14.9023	-28.1238	-5.36715	-8.26258
254	SLeX	Neu5Aca2-3Galb1-4(Fuca1-3)GlcNAcb1-3Galb1-4(Fuca1-3)GlcNAcb1-3Galb1-4(Fuca1-3)GlcNAcb-Sp0	651.89	409.324	61.3272	9.2265	1.69752	15.5773	8.6981	1.4374	14.6762	5.54328	6.3766	14.4256	102.022	-14.7881	20.5361	11.9906	5.55585	11.6239	-2.01245	-3.7099	-3.0089	4.93768	23.5207	16.5594	23.8328	-21.4118	-2.6179	2.43365	-5.57522	8.14262	16.0523	17.2645	-17.3419	-7.41523	1.23043	-0.1928
255	SLeX	Neu5Aca2-3Galb1-4(Fuca1-3)GlcNAcb-Sp0	-14.2929	0.62955	53.5329	6.16095	-0.105625	-3.33195	-2.29325	1.23998	2.08135	1.15535	10.7088	-2.89027	41.6873	22.5099	426.704	0.51205	-4.3617	-8.71665	1081.03	110.138	-13.1349	4.2651	2.61855	4.04705	3.96255	-21.1174	-19.2198	3.69642	-2.42572	9.85868	12.3154	4.14082	-12.168	-25.1231	-0.49995	-11.4505
256	SLeX	Neu5Aca2-3Galb1-4(Fuca1-3)GlcNAcb-Sp8	-32.3923	17.9161	-0.776175	-7.58242	-3.84063	0.84445	-5.6389	-7.07078	-4.22888	7.42805	-9.79765	-1.40465	76.2712	-3.97297	24.9362	5.04165	21.4899	-14.3275	4.00183	-5.9729	3.1434	-3.61615	7.88878	8.0695	5.71365	-0.4277	-21.1686	-9.06558	-19.0923	10.1131	11.5452	6.23165	-18.7753	-26.6149	-5.04825	-17.126
257	SLeX	Neu5Aca2-3Galb1-4(Fuca1-3)GlcNAcb1-3Galb-Sp8	17.0085	-22.14	0.374025	0.522525	6.1226	-5.6419	-13.6429	-7.48528	1.94565	4.40365	0.139175	0.512275	-99.507	-14.8521	8.488	0.032425	-2.49808	-15.8457	83.8771	-1.0886	-22.44	-3.1429	5.52053	2.30818	1.33622	-24.8983	-28.753	-6.6014	-18.5839	-2.30725	2.01025	6.49715	-28.8405	-34.6664	-1.7808	-22.2081
258	SLeX	Neu5Aca2-3Galb1-4(Fuca1-3)GlcNAcb1-3Galb1-4GlcNAcb-Sp8	-38.649	-23.1011	14.3417	4.25177	5.30747	7.9609	12.3398	1.63355	-4.5374	1.59475	4.68385	6.95565	-40.9338	10.2163	585.601	-4.0052	-1.0424	-5.3762	16.4456	12.14	15.8957	8.77487	23.2982	9.89585	3.80325	-5.71647	-15.0491	6.19785	5.82342	13.9444	14.4061	9.4587	-1.09015	-22.2732	30.4908	-8.563
259	3'S-Tri-LacNAc	Neu5Aca2-3Galb1-4GlcNAcb1-3Galb1-4GlcNAcb1-3Galb1-4GlcNAcb-Sp0	660.335	129.183	55.0851	-4.45555	-3.30888	-0.656725	-4.10645	-6.37217	-5.85815	2.39362	-7.50518	0.258425	58.1366	-54.0798	111.96	7.02913	10.2689	11.2942	16221.8	4391.59	426.077	-0.06385	4.54228	6.36585	18.4172	-7.55753	-19.3104	-0.975175	2.22257	202.472	48.3169	1.16658	5.72105	-8.79582	2.34648	-19.1585
260	3'SLacNAc	Neu5Aca2-3Galb1-4GlcNAcb-Sp0	-70.8088	21.4241	-11.6147	12.8941	5.31557	-7.97878	-0.098675	8.5675	-5.41518	-3.2793	0.097875	-5.14568	-130.317	53.6196	332.922	-6.51187	-0.290775	-11.5826	10736.7	1828.62	101.114	-2.46293	12.2542	12.9488	7.6384	-9.31543	-17.5606	-4.20108	-12.773	82.342	4.18727	3.85985	-13.6155	-67.637	-5.85882	-30.9975
261	3'SLacNAc	Neu5Aca2-3Galb1-4GlcNAcb-Sp8	-51.5513	-20.8314	4.14182	1.42353	0.70845	-5.64162	-8.23785	8.41095	-10.1892	10.5774	-1.21345	3.52585	-102.913	867.474	57.6324	1.55422	-6.1792	-10.2853	10486.2	1855.69	181.617	0.12075	5.27815	5.71975	15.5549	-19.949	-20.1342	-4.86673	-11.6388	24.8679	1.9102	4.09715	-7.62825	-31.3341	2.8463	-8.04818
262	3'S-Di-LacNAc	Neu5Aca2-3Galb1-4GlcNAcb1-3Galb1-4GlcNAcb-Sp0	331.016	-0.5583	7.07985	-8.71058	10.0155	4.79252	-36.1893	14.0275	-10.0326	-3.18633	-5.6804	-3.40842	105.916	-20.1521	38.1203	1.86518	-3.05475	-17.3892	15165.8	3394.94	365.144	-0.880925	6.18018	9.80995	11.7861	-18.0623	-16.5521	-1.53773	-12.335	140.016	2.7397	-3.3525	-15.2794	-32.1589	5.99103	-17.1123
263	BG-H6 (sulfated)	Fuca1-2Galb1-4(6S)Glcb-Sp0	-81.2263	6.20073	22.721	0.98475	3.4708	8.36187	-5.0132	1.05827	-0.32015	-2.17175	-1.81155	0.498275	-50.9406	215.098	242.913	-1.15092	7.32145	-2.07858	320.384	5.24295	23.857	2.00408	11.7586	5.57003	11.2856	407.402	12.5927	-1.01287	-8.69935	18.8803	7.26598	9.47565	11.7595	13.2505	-0.4087	-12.423
264	GM3	Neu5Aca2-3Galb1-4Glcb-Sp0	-49.6445	24.0476	5.71017	0.89215	19.0885	5.79883	-10.0475	7.85712	14.129	24.4205	10.7588	8.3321	47.6003	-74.0019	237.371	11.9259	12.9985	9.19995	7401.86	2519.22	108.176	15.1657	19.7874	17.3249	15.1045	-2.19967	-13.0178	10.1345	-3.7482	12.8326	20.8064	16.5257	-2.87082	-39.5123	1.7493	8.94083
265	GM3	Neu5Aca2-3Galb1-4Glcb-Sp8	-53.5688	-8.88295	22.4458	12.4234	6.21387	13.9651	-8.62453	6.83805	2.4926	-0.919925	-6.3824	4.1413	83.8534	185.643	334.279	15.2265	3.2074	-6.52617	405.302	1.96327	35.0841	0.1871	3.9525	10.099	11.8065	-15.5622	-6.59048	1.47788	-11.1762	26.4973	6.18145	3.55115	-22.5205	-16.3994	17.1694	-7.9337
266	6'SGalNAc	Neu5Aca2-6GalNAca-Sp8	436.906	-6.31085	6.18703	3.96185	-3.96283	-0.969275	-7.62355	-3.9007	-6.61143	8.13535	2.38012	-1.12732	4833.73	8140.76	1474.12	3.4733	0.297925	-0.777975	-1.86003	-0.6707	1.03095	-3.673	5.62802	-0.605775	2.14692	-10.2514	15.0041	-3.0839	-2.20482	22.9633	2.76758	4.78088	-10.348	-25.3165	-10.1077	-14.2374
267	6'SLDN	Neu5Aca2-6GalNAcb1-4GlcNAcb-Sp0	64.5004	-10.4075	1.97707	15.364	6.459	5.14973	14435.6	2101.87	233.851	1.47532	-4.70482	8.21085	40614.2	40684.1	25389.6	4447.24	3496.44	1591.15	0.8387	-2.56555	-1.28852	-2.89653	7.16308	10.5889	9.53535	-18.3033	-13.1386	-6.3273	-7.41875	1001.18	2.7007	12.1948	-20.2515	-21.038	2.92995	-16.6564
268		Neu5Aca2-6Galb1-4(6S)GlcNAcb-Sp8	-66.8467	-23.8567	67.1887	-1.5918	-6.23232	-4.70473	-15.9907	-14.5425	4.32355	-3.12755	-8.28912	8.09808	39463.4	42464.8	41313.5	18212.3	12953.7	7020.3	-0.812175	4.81267	3.91063	-5.55882	9.97365	3.49543	0.692025	-12.7275	-15.6465	1.91755	-9.9986	7.67738	3.73573	3.8581	-5.74808	-12.5595	-7.21802	-9.04365
269	6'SLacNAc	Neu5Aca2-6Galb1-4GlcNAcb-Sp0	9.17648	-15.9431	17.8426	5.28868	-7.7518	2.68428	-4.20462	-11.8709	18.0419	2.25052	1.94407	5.89973	41926.1	38822.8	32337.6	8729.46	6874.39	3929.36	-6.5159	1.6738	-3.5583	-1.25735	16.836	16.4041	4.88965	-14.6195	-11.3298	-4.124	-3.26448	30.1865	59.343	7.98475	-8.31622	-28.8667	-5.60717	-14.2216
270	6'SLacNAc	Neu5Aca2-6Galb1-4GlcNAcb-Sp8	118.191	75.8807	12.7279	7.64018	-4.27025	0.7139	10.45	-2.69005	-5.7493	11.7866	4.38523	4.43922	40019.2	41578.5	37710.3	13923.6	9367.99	4203.54	-3.95312	12.587	30.8591	2.1505	7.1078	8.84577	7.19217	14.5314	-25.192	-4.3074	-15.8557	36.5652	17.816	12.0192	-16.2164	-14.8348	-7.78383	-17.9008
271	6'SLacNAc-LeX-LeX	Neu5Aca2-6Galb1-4GlcNAcb1-3Galb1-4(Fuca1-3)GlcNAcb1-3Galb1-4(Fuca1-3)GlcNAcb-Sp0	882.369	742.251	75.7595	7.02542	19.2021	15.0173	0.44925	-2.65397	1.73872	3.1903	11.5438	2.41357	38813.7	42627.4	37395.2	16418.1	9821.61	5074.55	96.8169	49.6005	80.3851	7.33577	11.4086	13.6764	3.3909	-32.457	6.6324	10.8953	-10.6524	47.9613	212.942	24.989	11.6666	-25.9994	-0.986375	-6.94308
272	6'S-Di-LacNAc	Neu5Aca2-6Galb1-4GlcNAcb1-3Galb1-4GlcNAcb-Sp0	8.71198	4.74735	-1.17347	10.7826	7.26437	-11.2854	-2.61565	-0.8052	-4.00447	1.49295	9.76707	1.42605	38845.7	41553.1	40227.1	19277.7	11694.4	4440.19	776.588	11.4504	25.5572	0.96325	8.27507	5.13783	10.4646	10.4782	10.3603	6.4746	15.4971	23.6468	10.927	3.3159	-15.682	6.39665	4.53487	9.4449
273	6'SLac	Neu5Aca2-6Galb1-4Glcb-Sp0	-18.6324	-11.4793	6.87045	1.18533	0.627575	-10.3967	15.9597	2.9161	-7.69698	9.40958	0.5233	1.26655	20625.5	17518.1	340.563	7.9967	14.542	-1.31985	2372.26	458.299	46.3872	0.4556	7.31887	9.18938	10.9099	4.94918	15.8896	0.372725	17.4394	15.1781	10.0677	8.92942	-25.5229	-13.8952	1.33025	5.14793
274	6'SLac	Neu5Aca2-6Galb1-4Glcb-Sp8	-31.3025	28.0502	27.9877	12.8095	3.03703	8.87402	-6.7994	5.04155	33.3972	-0.46875	3.83267	5.66577	34845.1	30425	16310.7	358.127	145.617	14.6164	73.4059	17.2301	62.1233	2.695	5.47307	10.5694	6.37862	-16.094	-13.5167	0.557975	-9.56075	22.0226	26.7238	12.962	4.80712	-21.7329	-1.48533	-4.915
275		Neu5Aca2-6Galb-Sp8	-14.3287	-22.7029	24.2487	1.19192	2.90002	14.1018	-3.57235	2.56772	11.927	-0.47045	12.388	7.3025	36052.3	21549	16055	233.492	66.0054	0.314225	7.42768	3.04645	53.9388	3.28095	7.43265	8.04515	9.51298	-11.6163	-21.0336	2.35088	-4.46468	70.2517	6.30415	8.43515	-15.9057	-76.8892	3.9003	-22.5199
276		Neu5Aca2-8Neu5Aca-Sp8	-30.1154	-8.20625	15.8632	8.56135	-2.74008	-0.2902	11.6857	3.47118	22.1754	3.68867	1.6554	17.9459	43.9258	60.8373	94.2499	17.6003	6.70482	-10.8056	0.05485	0.720225	10.5432	1.25887	-0.713525	2.86215	8.25267	-10.2967	-13.6957	-4.8591	-7.43092	40.4787	8.15635	3.09555	-11.4828	-39.2493	-1.11622	-8.3248
277	GD3	Neu5Aca2-8Neu5Aca2-3Galb1-4Glcb-Sp0	-31.6211	-10.7556	26.9209	5.5285	-2.55742	-1.1848	-0.46435	15.777	-8.7639	6.33628	-10.3038	-0.6716	82.6658	-148.633	121.262	-4.28495	-1.5119	-1.9317	7122.33	3006.93	467.745	0.30905	3.39875	-1.3777	5.2685	-23.2987	-12.2134	-0.780925	-15.9562	7.6852	3.4266	0.99915	-15.2344	-27.939	-5.01397	-18.301
278	LeA-LeA	Galb1-3(Fuca1-4)GlcNAcb1-3Galb1-3(Fuca1-4)GlcNAcb-Sp0	232.647	191.874	61.4432	4.84445	9.58108	-1.00735	15.904	-13.8175	0.208525	12.1543	15.3674	7.15505	-44.0957	140.925	46.5146	-4.29108	3.3262	-8.50065	0.804325	-0.718075	-15.6062	5.23645	9.9488	6.96502	6.3479	-28.523	-24.4743	-6.43295	-9.8338	8.07655	5.98942	1.81393	-21.2323	-23.4961	-5.5541	-5.25347
279	STn like	Neu5Acb2-6GalNAca-Sp8	-15.7085	38.3375	25.6249	19.4128	0.597325	2.2555	-16.9181	-13.5534	-6.43395	3.35603	-8.7084	3.13315	35.1024	13.8055	97.7439	14.6615	-5.14223	-12.0127	0.237975	-2.42152	-4.99618	-1.88317	7.12413	6.78333	17.2203	2.8237	-24.3145	0.2336	-14.4699	8.4602	1.67973	2.01232	-13.2044	-22.6957	-5.65697	-9.0436
280		Neu5Acb2-6Galb1-4GlcNAcb-Sp8	119.655	-21.0877	174.861	-1.04285	-5.94635	4.69057	-18.4775	-12.8221	14.8869	5.443	-10.7914	5.07635	-45.4095	43.6857	113.001	-3.04903	10.7987	-7.53228	4.8254	-9.71868	-9.30058	1.02998	6.46192	5.29408	2.98275	-27.3681	-26.9367	4.59123	-19.7731	6.71135	3.14595	14.6761	-31.3129	-39.4825	-3.6773	-29.687
281	SLeA (Gc)	Neu5Gca2-3Galb1-3(Fuca1-4)GlcNAcb-Sp0	-24.672	-41.3035	13.9462	-0.67055	0.570725	10.0793	-16.2859	2.37348	17.1308	1.71955	19.3945	5.46055	5.14007	-93.9123	1345.39	-0.467775	9.95767	-12.208	-1.33542	3.0939	-4.81133	-1.62233	11.7572	10.5084	8.00457	2.39623	-0.7718	-0.927375	-12.2074	9.9278	7.29648	8.14377	-10.8208	-13.6226	2.37678	-5.68308
282	3'S(Gc)LeC	Neu5Gca2-3Galb1-3GlcNAcb-Sp0	124.302	-19.7312	21.0625	-3.1418	-7.7655	1.62845	-7.4766	24.3794	7.93158	7.42235	12.5578	1.44817	127.496	-13.6097	81.7548	-0.5163	0.298025	-13.4291	2.69853	10.2778	1.33438	4.85208	7.93162	11.3915	12.1048	5.85872	-19.1186	-0.999525	-6.31725	5.16393	3.26607	2.93098	-3.71605	-13.1656	3.8956	-6.4335
283	SLeX (Gc)	Neu5Gca2-3Galb1-4(Fuca1-3)GlcNAcb-Sp0	-64.999	-8.35615	-6.14225	1.95257	16.1307	-1.22973	-12.9772	14.1658	9.3589	-3.28572	9.40625	-2.44057	-170.306	-28.3483	866.78	5.16993	1.13863	-26.3225	30.9692	0.03975	-3.5053	-0.9633	11.2341	7.73592	2.04808	-7.07575	-14.1731	-1.7508	-9.29545	6.7757	6.0757	3.75442	1.3497	-15.1074	-4.95135	-1.19763
284	3'S(Gc)LacNAc	Neu5Gca2-3Galb1-4GlcNAcb-Sp0	-29.4316	0.5905	4.42185	-1.04443	1.21053	3.92515	7.09855	-0.706375	2.27372	2.29923	7.40457	-5.47192	-59.2341	38.5112	496.121	-2.56825	-0.50465	-11.4354	9516.22	2796.94	300.381	1.94583	2.95547	3.1504	14.2779	-2.31973	-8.74825	-2.08665	-3.5408	5.58965	2.90697	1.12557	-10.1787	-30.5795	-0.3507	-8.57927
285	GM3 (Gc)	Neu5Gca2-3Galb1-4Glcb-Sp0	-159.489	-74.949	5.52343	3.98018	0.171975	4.42122	-0.6339	3.4601	8.00068	6.10947	6.7556	-2.4169	-59.5751	-93.848	1311.58	1.06385	4.21522	3.8807	3304.81	370.304	37.1366	5.4915	15.5816	14.2351	21.469	-7.2869	-20.4805	10.5743	-9.4163	14.0765	8.46917	8.132	-3.82548	-28.9783	3.85918	-16.4155
286		Neu5Gca2-6GalNAca-Sp0	-45.1291	-8.47147	13.5814	-3.78675	4.86025	13.8265	0.8202	4.31295	-7.65908	-6.89335	1.02247	-1.67727	3137.31	2237.17	66.8202	23.1865	7.17155	-0.866125	-9.1262	-6.5845	9.7976	0.10445	15.1535	7.81175	5.84775	-3.14648	-6.2372	5.54238	-9.09275	13.7348	6.44093	6.61405	4.46255	-25.1659	16.5104	-6.79947
287	6'S(Gc)LacNAc	Neu5Gca2-6Galb1-4GlcNAcb-Sp0	-112.173	34.5454	2.26845	2.18463	7.34095	-0.887975	2.35413	12.2134	14.9436	-2.3552	0.68425	0.4869	37503.8	42018.4	32892.6	13353.5	7765.7	6262.84	12.1273	17.5999	7.35325	-3.43362	13.9809	6.45127	12.7646	-0.78175	-13.7138	-4.45833	-5.2033	101.517	25.8376	16.5116	-0.60315	-26.4044	-0.772025	-8.61103
288		Neu5Gca-Sp8	-35.3373	-39.755	34.2071	2.23903	8.44933	3.84055	-16.0065	11.7076	13.8674	-4.16805	5.76075	27.8977	-58.1986	-17.1379	262.562	11.1942	1.75377	1.20588	16.397	15.9602	26.2264	-0.122975	7.11855	5.8566	11.3944	-4.91617	-10.2949	15.9503	-3.20125	11.819	7.76752	17.6366	-13.1107	-10.9364	4.66233	1.12255
289		Neu5Aca2-3Galb1-4GlcNAcb1-6(Galb1-3)GalNAca-Sp14	432.975	-34.3091	-6.278	-7.5103	-9.8628	-3.15103	-41.0634	-0.93245	-4.1408	-15.8943	-8.40623	-1.87293	-180.04	-87.9806	304.405	26.8861	-5.25338	-6.4297	2123.03	49.9155	27.5121	2.49275	11.7329	9.78787	10.6054	-15.3698	-33.1976	-2.27662	-13.5163	14.0104	6.17042	10.691	-6.1191	-40.8518	1.60548	-10.296
290	Di-LeC, pLNH tetra	Galb1-3GlcNAcb1-3Galb1-3GlcNAcb-Sp0	-39.4551	-29.6009	21.8177	2.83878	-2.82863	-2.21845	-7.46715	-9.66708	10.2797	-1.06452	7.2936	17.1016	31.5893	235.608	84.1914	4.66543	1.731	3.2301	29.5895	24.2213	24.2051	-2.51723	11.3155	4.72865	17.9893	-7.68508	-20.4855	-0.276975	-1.8244	154.561	46.8351	100.423	-2.9919	-12.1543	3.83545	3.08265
291	6-su-LeX	Galb1-4(Fuca1-3)(6S)GlcNAcb-Sp0	-18.0712	-80.3441	120.839	11.8525	-6.23473	-0.214575	-23.9822	-22.0918	17.0103	2.85967	-1.45623	22.2372	-160.625	-78.683	411.244	8.8955	7.58895	-6.31298	2.5272	-6.05065	17.06	3.56242	20.2502	12.5925	11.3969	-10.1118	-7.04245	-11.5841	-9.26058	30.7804	18.5153	13.7262	-6.61015	-31.3944	-3.96982	0.738075
292	6-su-3-FL	Galb1-4(Fuca1-3)(6S)Glcb-Sp0	-68.9835	17.7474	55.0496	24.1257	5.76535	20.4839	-5.19343	-3.79605	17.9293	0.06245	5.49858	14.8364	-122.7	207.388	210.493	13.5722	0.438975	6.77802	36.912	13.3829	24.7248	8.02837	9.42953	18.445	13.417	6.60933	19.5911	8.05847	4.02542	20.5827	22.4437	23.0148	-3.69805	-1.1106	3.70862	0.600225
293	LeX-LeA	Galb1-4(Fuca1-3)GlcNAcb1-3Galb1-3(Fuca1-4)GlcNAcb-Sp0	18.2229	-15.9422	54.6957	14.5951	3.1906	11.295	-0.933175	9.06615	6.5308	-1.53637	21.3881	5.94632	-9.4293	-119.81	114.622	10.2966	-0.362625	-5.50188	-3.7196	12.4648	-0.686325	2.43355	10.67	23.5222	5.06008	-6.48648	-5.72082	2.44453	2.00977	13.9273	23.9434	24.0746	-20.0307	-15.6188	9.55402	-4.97882
294	LacNAc-LeC	Galb1-4GlcNAcb1-3Galb1-3GlcNAcb-Sp0	11.6887	-4.98915	175.07	-0.947525	3.37853	0.387	-7.86835	1.04322	20.7343	0.426075	1.12883	-0.3434	119.647	86.1099	249.41	-3.02442	2.95663	-12.4468	4.93673	16.3126	16.5704	-0.15305	11.014	2.98358	16.9756	-19.2989	-8.0254	2.8597	-4.50883	17247.2	2782.35	1181.8	-15.8108	18.0885	1.78198	29.8019
295	3'SLeC-LeC	Neu5Aca2-3Galb1-3GlcNAcb1-3Galb1-3GlcNAcb-Sp0	311.451	18.8473	20.8829	-0.226875	6.69728	4.94195	-0.0106	-1.30823	-1.34828	5.27455	0.109275	-0.090275	2.51465	-56.5506	40.579	3.38945	29.2192	-15.9805	-13.7424	4.97787	0.29465	5.0197	7.83035	19.6737	12.2865	-5.58125	-6.27718	-7.0222	-17.9862	10.7409	6.50585	6.13908	-23.3295	-30.2763	-6.48905	-11.2305
296	3'SLacNAc-LeC	Neu5Aca2-3Galb1-4GlcNAcb1-3Galb1-3GlcNAcb-Sp0	86.5994	-22.6034	1.4826	-1.38743	1.0357	11.7344	-6.60652	10.0086	9.839	2.35318	-7.7817	-2.21075	-129.035	64.6762	95.146	-9.71945	0.0039	-16.0903	5954.91	1162.56	82.2564	-1.6289	4.8313	6.2795	7.22318	-27.3034	-26.0392	12.2908	-15.0762	0.1595	0.626525	-4.40265	-35.9571	-60.9977	-5.512	-37.2467
297	3',4'-di-Su-LacNAc	4S(3S)Galb1-4GlcNAcb-Sp0	-14.865	-13.1469	106.359	2.03025	4.93673	-2.3105	-1.3846	4.87817	5.10297	-9.17803	8.438	11.9677	-54.7653	32.3611	617.267	-2.37085	-0.952425	-15.8291	-23.9429	-8.90365	1.83755	-1.45177	9.26223	7.58195	4.3801	-6.48943	-22.0709	-2.261	-17.4669	11.5225	5.84658	4.60485	-27.6135	-25.9455	-5.421	-19.5559
298	4,6'-di-Su-LacNAc	(6S)Galb1-4(6S)GlcNAcb-Sp0	83.504	-31.7695	3.9937	-2.85315	6.56872	-14.4089	-15.8574	-4.6005	-3.42042	-1.60553	4.28315	-9.30718	42951	32632.1	875.645	-0.3555	-4.6246	-26.4289	1233.49	534.76	38.3266	2.66752	15.1247	5.77455	1.62627	-32.8957	-24.0702	-2.2536	-18.5606	20337.5	2783.17	604.856	-31.0307	-43.1004	-8.3239	-33.1961
299		(6P)Glcb-Sp10	-60.0829	-13.1032	102.406	6.52435	4.62852	18.326	6.6801	14.1251	16.3212	12.974	-0.318675	16.9071	-55.3712	272.078	483.096	-0.450575	2.05375	4.90515	19.4547	22.1442	46.2796	0.689225	7.06017	8.6454	19.3265	-1.58633	-0.8414	8.95925	-3.94925	9.80122	19.7918	15.2768	-0.473575	-2.8083	10.5882	-0.42635
300		Neu5Aca2-3Galb1-4(Fuca1-3)GlcNAcb1-6(Galb1-3)GalNAca-Sp14	92.7606	-15.9498	119.307	20.6759	9.4443	32.721	29.2656	21.9556	39.3438	3.9998	39.6273	29.2525	92.4597	619.79	161.443	31.108	20.7904	10.9324	458.092	215.535	644.103	7.36237	22.6098	19.5833	18.3391	0.83355	21.3326	-0.0973	25.8959	39.5137	24.7329	20.5741	-17.4755	-15.6893	7.37532	19.9133
301		Galb1-3Galb1-4GlcNAcb-Sp8	335.095	31.7217	26.4313	9.04975	3.48297	12.6519	-7.75985	3.1887	6.00962	10.0711	12.9537	17.3791	26.957	287.743	34.1343	7.55787	6.6117	-4.88492	119.235	15.4219	16.4857	1.61758	12.9958	9.33197	9.31522	-4.58157	-21.2889	-1.64062	-20.2748	6043.33	916.494	224.49	4.76572	-15.3509	2.12135	-13.0076
302	A1-sp12	Neu5Aca2-6Galb1-4GlcNAcb1-2Mana1-6(Galb1-4GlcNAcb1-2Mana1-3)Manb1-4GlcNAcb1-4GlcNAcb-Sp12	41957.8	39173.1	2090.88	15.4072	31.0202	-5.30542	-1.78322	7.51005	5.66147	2.71157	4.13393	5.06732	41499.9	26816.6	43465.5	11219.4	8296.79	2513.84	-13.8287	-9.14147	29.7514	-0.212675	10.0572	28.8335	7.58715	-15.3229	-18.9603	-7.99425	-21.6822	38380	17899.5	5140.16	-13.605	-53.8593	2.2536	-24.4064
303	LNnH-like	Galb1-4GlcNAcb1-6(Galb1-4GlcNAcb1-3)Galb1-4GlcNAc-Sp0	-6.59972	-23.9093	4.7688	9.63252	1.05265	10.7504	-5.56213	24.8815	4.18025	8.04947	8.70015	4.87373	71.2044	157.791	42.9914	9.96447	9.3219	-1.81932	130.782	-3.03215	7.14153	-0.020225	6.75617	4.04128	14.7639	6.31322	0.20805	-1.19125	-9.19123	38489.7	21656.4	5341.66	2.15763	-18.3711	0.12885	-4.86348
304	LacNAc--	GlcNAcb1-6(Galb1-4GlcNAcb1-3)Galb1-4GlcNAc-Sp0	227.829	-28.6225	2.18538	-10.4627	-7.15348	-5.83178	5356.22	304.897	87.9374	-6.93275	7.1332	2.82323	-14.7199	253.734	535.507	0.74665	-4.57725	-19.2311	0.849	5.53383	-1.04238	-2.7676	17.9632	4.63415	8.78255	6.17455	3.76032	-1.4203	0.272575	36115.4	16670.2	3170.72	-6.08325	-16.0536	-0.205	-9.85233
305	LacNAc--	Galb1-4GlcNAca1-6Galb1-4GlcNAcb-Sp0	91.9211	-12.3689	0.5251	-5.56337	-8.39602	8.17125	-14.1718	4.45547	13.155	-2.21687	3.42173	4.59282	174.122	22.2774	141.96	14.3336	0.7642	-2.36175	-0.33285	-2.1067	0.85905	0.7404	5.72003	4.0687	6.23087	-0.4641	-13.8408	3.23975	-2.72935	33105.3	12151.9	1047.88	-3.64498	-23.5654	3.61165	-10.1543
306	LacNAc (1-6dimeric)	Galb1-4GlcNAcb1-6Galb1-4GlcNAcb-Sp0	-82.9543	-1.24492	0.274025	-0.13115	8.0227	-11.1575	129.238	12.9866	7.2864	10.1135	-3.13563	0.559875	-167.016	259.079	879.367	6.49005	-4.00198	-7.87433	-2.7821	1.41777	-2.06663	-0.6982	2.10032	1.98645	3.21998	0.50745	-17.8217	3.98442	-7.0982	34824.6	9708.95	1631.38	-12.6177	-3.90237	-15.1607	4.15185
307		GalNAcb1-3Galb-Sp8	47.0145	-20.634	12.3124	6.641	-2.74077	-0.676	-4.9346	-8.2455	-2.13937	-6.99387	-1.3025	17.9299	-30.2096	180.277	34.9056	17.2777	-2.82728	-3.44473	-4.89545	-1.674	4.44208	-3.59295	3.56285	9.68472	3.72575	-10.2982	-16.0408	-3.0176	0.7246	13.4044	8.70945	7.50907	800.218	8.58182	-1.91743	-11.0496
308		GlcAb1-3GlcNAcb-Sp8	-143.21	58.497	-5.37	2.95477	3.11283	4.99798	0.793625	2.90365	-5.71272	-6.59048	1.41592	-5.66935	-113.075	-41.1764	537.343	16.1044	0.5088	-9.98763	7.9811	9.35482	4.7398	0.364875	11.4795	-1.08645	6.66197	-12.5563	-10.8666	5.706	-11.3855	17.1017	10.029	5.00323	-13.0722	-22.3457	6.7328	-16.286
309	A1B	Neu5Aca2-6Galb1-4GlcNAcb1-2Mana1-6(GlcNAcb1-2Mana1-3)Manb1-4GlcNAcb1-4GlcNAcb-Sp12	41526.1	48019.5	5927.14	158.177	67.0247	4.54925	5.81067	2.44045	1.9815	-3.13668	3.37092	15.9784	37783.7	35929.3	31326.2	6426.88	4601.61	2641.28	-1.292	10.5678	23.9569	0.97145	10.9114	5.78108	8.5028	-7.26295	-5.38715	-3.74625	-11.4562	11.639	3.72672	4.5083	1.4161	-22.3909	5.2934	-18.0084
310		GlcNAcb1-3Man-Sp10	-174.411	-19.3044	9.62865	1.69672	19.2065	9.92307	-13.0993	0.4863	2.619	-1.93595	13.9898	10.2073	-194.145	-3.39452	222.78	-12.374	-3.29205	-19.476	18.5578	15.1149	15.5576	2.3541	10.2709	5.92355	13.2099	-2.0075	-27.9358	2.4243	-2.3727	19.4582	11.376	3.37955	-15.1044	-21.877	-3.94965	0.18045
311	chitobiose	GlcNAcb1-4GlcNAcb-Sp10	-41.4275	-42.6471	3.6933	7.4517	0.4015	-3.41137	35899.1	29434.2	10249.1	1027.11	180.793	38.3813	-111.119	26.0551	42.8171	-5.6716	-13.6492	-1.05878	10.9716	2.97128	9.67702	0.379575	8.68445	3.1053	5.34675	2020.26	-10.7562	-2.4519	-15.2898	1656.2	5.92558	4.02873	-8.19695	-16.5255	4.95865	-5.72895
312	chitobiose	GlcNAcb1-4GlcNAcb-Sp12	-92.7839	-73.9403	5.25717	-8.37772	-0.965625	13.6352	26632.5	14007.9	7768.73	143.382	9.3054	-2.8036	193.552	-76.3286	502.892	15.5061	-1.10862	-11.4574	5.81743	42.1478	23.4607	-0.186175	7.2046	19.0152	16.3338	657.953	-19.2693	-2.02633	-2.85433	2045.55	21.1845	10.9407	-16.5829	-25.3183	20.2054	-15.1173
313		MurNAcb1-4GlcNAcb-Sp10	-61.398	-11.1504	0.612325	-4.9141	1.93725	-1.50578	30037.7	8951.15	1347.55	6.36223	3.81933	3.1248	-141.224	-38.3792	47.9904	1.45182	-3.17518	-12.017	16.3595	-3.80505	8.89673	-5.08312	7.37543	7.24845	6.3047	20.1929	-1.80337	-9.80615	-6.72702	1090.35	4.415	-0.499625	-1.60073	-27.2367	-1.45898	-5.8637
314	Mana1-6Man-b	Mana1-6Manb-Sp10	82.8403	26.4596	113.644	1.7245	5.2247	9.19215	-18.7871	0.05275	16.4409	3.92075	7.6525	17.0194	-180.679	75.415	481.414	10.8527	12.7933	-5.78235	8.8176	9.503	6.99547	5.78875	6.69068	16.0181	1.77837	0.398625	-8.68117	-1.2262	5.30742	35.7529	10.7067	21.912	-4.1122	-39.5449	-6.9366	-1.73817
315	Man5	Mana1-6(Mana1-3)Mana1-6(Mana1-3)Manb-Sp10	32005.1	29442	29982.6	5258.45	5249.23	537.275	16.6891	16.0411	9.55577	-0.895175	7.74685	9.46113	-164.393	224.524	128.975	14.6763	13.3128	5.0144	16.0214	14.5463	10.0167	3.42353	7.50465	13.4223	9.36657	0.27625	-1.38157	6.159	4.513	12.9226	12.9201	15.8315	6.77792	-0.031375	4.61635	-0.41155
316	Man8D1D3	Mana1-2Mana1-6(Mana1-3)Mana1-6(Mana1-2Mana1-2Mana1-3)Mana-Sp9	36801.8	33623.4	35116.4	6303.89	6004.18	884.183	24.659	13.8576	16.7482	9.93143	-2.64743	15.0341	912.909	1245.26	205.101	32.92	10.4799	-10.6193	-3.36792	11.7714	15.2051	0.14935	16.2389	15.8725	5.76508	4.78125	-3.76047	1.48165	2.79347	10.3645	10.8899	10.851	1195.14	136.848	1.90352	-11.1615
317	Man9	Mana1-2Mana1-6(Mana1-2Mana1-3)Mana1-6(Mana1-2Mana1-2Mana1-3)Mana-Sp9	35077.4	27832.2	38880.1	4613.47	5350.19	1093.21	36.2503	22.3782	16.9648	4.08693	-1.88363	10.6593	-5.0986	2445.15	444.943	50.455	17.5557	7.3381	25.9458	18.5315	25.4249	-2.26095	14.2966	1.22497	9.27735	-18.6137	-22.9575	-8.09935	-2.2734	17.1113	0.835025	4.34467	1443.16	22.8514	0.26495	-19.1036
318		Neu5Aca2-3Galb1-4GlcNAcb1-6(Neu5Aca2-3Galb1-3)GalNAca-Sp14	79.4628	8.41583	39.8454	1.37322	-3.14193	3.52113	-3.16585	-10.3949	0.081775	-2.06367	0.608075	-7.33138	34.5649	-86.0621	72.5929	3.54075	5.3447	-16.1661	1665.3	52.7792	-7.5943	-2.573	3.72043	6.13195	8.15975	-8.1178	-21.8362	0.08065	-14.8767	6.2357	0.53665	1.72677	-15.6874	-35.7596	-3.72345	-23.0175
319	A2-sp12	Neu5Aca2-6Galb1-4GlcNAcb1-2Mana1-6(Neu5Aca2-3Galb1-4GlcNAcb1-2Mana1-3)Manb1-4GlcNAcb1-4GlcNAcb-Sp12	45596.7	31761.3	1279.23	12.4293	22.2543	10.1425	-2.32048	-0.96245	-3.55147	2.8388	4.1296	17.438	38980.6	33961.5	27611	3804.34	2435.47	384.794	1995.16	266.189	16.2696	-1.48628	10.5744	9.09595	6.1842	-29.2814	-32.6512	-1.96015	-11.9077	282.935	106.574	38.5293	-27.4278	-38.8148	-6.678	-18.5705
320	A1-sp12	Galb1-4GlcNAcb1-2Mana1-6(Neu5Aca2-6Galb1-4GlcNAcb1-2Mana1-3)Manb1-4GlcNAcb1-4GlcNAcb-Sp12	42598.2	46131.5	2527.04	21.7744	26.9781	11.5486	-0.925975	-1.99792	4.72298	1.32133	-2.94645	43.1253	41587.6	40416.1	36956.4	13584.2	11555.7	3742.31	15.9885	5.87328	8.02575	-1.73628	14.5191	6.7473	3.0782	-4.17122	-24.6102	-5.6334	-2.95568	38384	28627.2	4432.49	-42.5297	-40.9866	-3.4771	-14.9253
321	biantennary	GlcNAcb1-2Mana1-6(Neu5Aca2-6Galb1-4GlcNAcb1-2Mana1-3)Manb1-4GlcNAcb1-4GlcNAcb-Sp12	42652.5	50437.4	5548.44	253.15	669.708	14.7385	-16.1996	-7.62343	14.2425	-5.17105	-0.449625	-4.71343	37621.5	34105.1	36346.6	11977.5	10936.3	3719.51	25.8286	12.8899	33.0447	0.934075	3.70215	5.06177	4.1584	-41.8548	-20.6552	-7.56573	-13.2718	419.338	128.041	18.189	-36.3116	-53.78	-9.21568	-13.6812
322		Neu5Aca2-8Neu5Acb-Sp17	53.3191	2.12535	10.6977	3.01013	4.2633	2.4855	-5.68485	7.48565	8.75662	9.70435	9.0665	8.24155	-103.224	287.427	101.579	7.66517	2.74603	-10.8211	29.5492	6.68975	46.6824	1.15963	20.8081	11.3197	17.5308	-4.7447	-9.83062	6.35405	14.2045	16.9463	7.40608	3.28713	-6.9618	1.67332	7.7143	10.6784
323		Neu5Aca2-8Neu5Aca2-8Neu5Acb-Sp8	-33.5001	9.58403	3.22297	0.99805	0.468175	0.1212	1.8119	10.5577	-2.29002	-4.1181	26.4199	9.02205	-184.357	70.1909	212.869	-3.4383	-0.677225	-4.74482	38.6588	6.02993	15.3502	-3.8147	9.33417	1.72295	13.3581	5.75425	-28.0468	-1.9282	-17.3114	8.30933	5.47445	-1.00275	-14.054	-16.5484	-1.209	-8.06173
324	6'S(Gc)b2-6LacNAc	Neu5Gcb2-6Galb1-4GlcNAc-Sp8	68.5722	-22.569	6.15203	12.6505	3.45555	19.7437	-0.388475	17.5943	2.7442	0.082375	16.7284	6.97332	92.1868	76.9164	49.2457	10.6688	6.14035	-8.33215	124.265	12.3196	86.4233	0.82795	8.5939	8.27365	12.0443	-2.91478	-4.02065	8.0946	-9.131	39.3266	19.1235	10.0949	-7.3424	-25.2569	9.65983	-5.9504
325	LeC---	Galb1-3GlcNAcb1-2Mana1-6(Galb1-3GlcNAcb1-2Mana1-3)Manb1-4GlcNAcb1-4GlcNAcb-Sp19	37875.9	36711.5	7436.98	491.68	661.775	109.442	32.7341	10.0846	35.8017	12.3565	10.4377	20.4447	131.563	73.9022	304.986	3.57712	20.0167	-1.52775	29.1018	-4.90075	36.3467	0.1906	18.724	16.3337	11.544	-15.7863	-18.4332	-0.7374	0.814825	17284.9	2032.12	676.757	-15.8548	-38.5582	25.6806	-16.9229
326	A2-(a2-3)-sp12	Neu5Aca2-3Galb1-4GlcNAcb1-2Mana1-6(Neu5Aca2-3Galb1-4GlcNAcb1-2Mana1-3)Manb1-4GlcNAcb1-4GlcNAcb-Sp12	42290.7	34480	1648.74	27.6688	32.1153	13.1634	-6.44135	5.6895	18.5088	3.20643	0.64545	11.9872	-56.5438	136.79	51.2871	3.31745	3.20025	-1.9957	13041.4	6167.54	374.233	-3.72037	-0.5994	7.13493	6.29128	-3.83192	-1.45213	-0.58065	-13.6686	12.6095	8.6494	0.898875	-12.8413	-33.0374	-4.9743	-13.0191
327	A2-(a2-6)-sp12	Neu5Aca2-3Galb1-4GlcNAcb1-2Mana1-6(Neu5Aca2-6Galb1-4GlcNAcb1-2Mana1-3)Manb1-4GlcNAcb1-4GlcNAcb-Sp12	48590.3	33183.5	3714.89	-0.975825	1.8256	4.36548	-16.939	15.2466	0.007125	7.54037	-0.051075	15.2637	35294.3	44659.9	40555.9	7463.83	6198.68	2804.07	8817.84	2633.79	184.675	-0.549025	9.25943	8.8818	17.7942	7.82145	-2.23922	10.6003	-0.107375	71.177	40.4477	14.4181	-11.0267	-23.1358	-3.5567	-8.93838
328	LeX--	Galb1-4(Fuca1-3)GlcNAcb1-2Mana1-6(Galb1-4(Fuca1-3)GlcNAcb1-2Mana1-3)Manb1-4GlcNAcb1-4GlcNAcb-Sp20	24888.6	16369.1	1473.05	7.913	7.3034	1.03803	-8.04085	-5.8282	15.8263	12.0559	8.47398	16.2159	28.9695	-35.3942	472.216	4.1268	1.2952	-1.30433	-2.50685	7.55823	14.1276	-1.19562	9.874	6.3701	15.9206	10.0881	-4.72002	5.3912	-0.81145	5173.39	977.607	131.03	-6.5977	-5.39767	11.5113	-6.74103
329	9OAc3'SLacNAc	Neu5,9Ac2a2-3Galb1-4GlcNAcb-Sp0	-116.751	-24.3394	6.3772	10.711	21.0529	0.7957	-3.08675	19.2969	9.17383	9.41102	6.6523	1.24683	-162.246	-90.454	358.249	-1.8997	-2.49582	-0.468475	8994.69	2445.78	153.974	4.2456	19.0159	22.3651	22.5035	-2.22857	-1.4918	2.32695	0.9409	156.442	38.4292	29.2494	-0.285875	-34.1341	-4.2901	-9.75393
330	9OAc3'SLeC	Neu5,9Ac2a2-3Galb1-4GlcNAcb-Sp0	133.419	-19.1374	30.7468	0.27295	5.72728	4.5406	13.9171	4.399	3.0021	2.46342	-2.33383	19.9767	42.312	-49.5005	489.64	5.17248	1.75415	-12.7428	-9.48457	-5.75265	10.8783	-1.72875	6.8601	7.01053	9.87575	-10.9197	-21.1287	-7.247	-15.3469	33.5895	0.9859	2.48993	-13.2142	-33.3013	-0.306575	-8.6885
331	6'SLacNAc-LeC	Neu5Aca2-6Galb1-4GlcNAcb1-3Galb1-3GlcNAcb-Sp0	-159.682	-65.1521	-28.111	-4.20218	22.3936	-2.74068	5.38718	23.7939	-9.25232	19.7974	-2.48972	-7.1162	36350.3	44560.1	36319	15146.8	8636.8	6256.53	18.4042	13.4169	4.00817	0.712325	7.80183	-1.06012	3.47342	-6.3937	7.19035	1.21472	14.5343	408.402	36.5091	2.75207	-4.8035	-30.835	6.60065	-9.44357
332	SLeA-LeA	Neu5Aca2-3Galb1-3(Fuca1-4)GlcNAcb1-3Galb1-3(Fuca1-4)GlcNAcb-Sp0	1169.99	670.046	158.103	6.73088	2.3214	8.26988	-1.98147	-5.64712	12.1516	5.68935	-3.45572	7.51735	124.479	-30.4423	604.051	6.53852	1.49087	-4.5071	-5.88632	16.279	13.9088	8.76062	35.5905	12.3324	10.1947	-3.0282	-9.61625	0.67565	-5.4134	17.2822	6.61268	10.0295	-5.21007	-16.4171	-3.6844	-0.00275
333	6'S-Tri-LacNAc	Neu5Aca2-6Galb1-4GlcNAcb1-3Galb1-4GlcNAcb1-3Galb1-4GlcNAcb-Sp0	-103.647	-38.6162	-6.5928	-8.19642	10.3122	-7.15475	-18.732	-2.36247	-4.26468	-9.92542	-0.510925	0.269975	42176.9	47362.1	35562.2	24393.8	12271.1	8713.31	-9.20847	-1.70962	6.7304	-1.93323	3.52352	8.76995	10.7498	-13.6613	-26.7014	9.59775	-16.2052	59.0394	16.8005	13.0277	-12.8486	-18.7384	-1.0585	-1.28907
334	P1 like	Gala1-4Galb1-4GlcNAcb1-3Galb1-4Glcb-Sp0	-43.6295	-39.3001	31.934	-4.1316	1.75498	0.6457	-15.096	7.8785	2.39508	-0.80245	1.47715	17.6333	-63.1907	44.3492	83.5915	8.80825	-3.6011	10.3117	11.2922	5.3232	14.4509	-0.6262	5.5952	16.0815	5.99127	-8.14127	-4.99565	-3.63793	-7.77338	140.292	66.737	12.4413	972.304	-10.5565	7.98027	4.0112
335	Gb4-like	GalNAcb1-3Gala1-4Galb1-4GlcNAcb1-3Galb1-4Glcb-Sp0	-251.152	-25.5104	22.5115	-4.73308	2.13203	-7.43918	-41.0755	-2.36512	19.294	11.7685	12.3149	2.87865	-82.9924	-81.1132	137.114	17.5123	-7.03807	-3.18	7.69545	11.9527	37.2038	0.873775	6.74038	9.40695	7.8688	-16.4684	-24.0258	-5.1824	3.10065	14.85	0.692375	4.12395	1562.46	-25.636	-9.18185	-10.861
336	BG-A--	GalNAca1-3(Fuca1-2)Galb1-4GlcNAcb1-3Galb1-4GlcNAcb-Sp0	-46.5358	-30.5196	-1.58573	-7.70893	6.535	2.25735	987.269	54.6788	2.65022	10.6328	1.43238	3.65415	-133.207	543.771	30.893	6.48195	2.7345	-5.3667	105.785	15.8779	12.4169	25273.7	34579.1	20840.1	4156.59	-10.3562	-5.44102	-1.86715	3.02257	172.09	533.77	86.8522	-3.85237	0.21725	-4.7687	6.80842
337	BG-A--	GalNAca1-3(Fuca1-2)Galb1-4GlcNAcb1-3Galb1-4GlcNAcb1-3Galb1-4GlcNAcb-Sp0	-86.7069	43.7489	107.285	17.9761	5.01465	34.2519	1172.64	69.8606	27.6338	3.66127	24.4319	48.9362	-114.796	1074.02	438.432	45.2144	10.9053	28.0157	52.0581	18.1608	53.4711	23463.6	26230.3	19018.5	3361.42	24.8361	-3.81495	18.5814	3.956	10623.6	1066.93	281.689	27.1066	-25.4078	12.3153	8.70915
338		Neu5Aca2-3Galb1-4(Fuca1-3)GlcNAcb1-6(Neu5Aca2-3Galb1-3)GalNAc-Sp14	11.8963	68.1677	65.5984	14.2357	18.5507	42.8419	-3.4236	16.4444	44.46	9.8208	31.5013	15.2519	149.62	372.319	388.499	26.1314	4.0865	9.60855	347.632	53.7152	136.539	19.4962	17.9178	31.5784	30.2926	56.4174	36.6012	25.0634	12.2164	9.86545	20.7128	16.4056	15.2103	39.4563	13.983	27.8077
339		GlcNAca1-4Galb1-4GlcNAcb1-3Galb1-4GlcNAcb1-3Galb1-4GlcNAcb-Sp0	2110.64	436.591	34.582	3.6334	7.26925	-1.71705	26967.8	32014.1	5349.68	139.601	303.454	3.16228	84.1524	-83.0148	336.516	2.4024	7.27862	-12.1828	1.69587	-8.52402	-0.85525	19817.5	20215	12910.9	2728.03	2007.06	8.5034	-6.9491	5.08188	684.821	2.07345	10.2366	-23.4313	-33.7406	-0.4876	-4.65442
340	GlcNAca1-4Galb like	GlcNAca1-4Galb1-4GlcNAcb-Sp0	881.149	136.578	57.2645	21.8217	4.98705	-8.97508	29123.1	37705	4419.52	431.328	127.903	6.30622	-22.4642	246.899	338.661	6.10243	1.04697	-13.4051	-6.36037	6.0343	17.3094	12346.1	11012.2	6288.92	1410.22	2399.02	-2.71683	1.85362	0.282975	241.999	9.84583	5.68537	-15.9253	2.73577	-7.91855	11.1637
341	GlcNAca1-4Galb like	GlcNAca1-4Galb1-3GlcNAcb-Sp0	-33.2624	-2.88163	32.9617	0.5055	-1.96647	-6.17158	4610.41	1246.63	182.059	-5.15592	1.66245	2.86515	103.763	-7.662	151.749	11.1792	-1.90362	-10.5407	1.03203	9.50158	14.2088	13737	10641.2	4329.82	1884.19	22.6723	-21.3201	0.930475	-11.0845	265.911	6.2835	4.60923	-21.2172	-36.0938	1.52955	-25.5749
342	GlcNAca1-4Galb like	GlcNAca1-4Galb1-4GlcNAcb1-3Galb1-4Glcb-Sp0	600.892	139.148	45.3455	4.75063	1.55297	-5.7637	18151.1	33717.1	2732.74	155.899	95.9801	3.51943	-186.725	-106.266	-3.63	-3.2231	4.4919	-12.196	7.96663	6.02092	24.1565	16070.1	13872.4	8139.95	1261.72	3456.67	-16.9373	-11.4945	-20.3486	132.468	-0.304725	6.2141	-29.9682	-40.9613	-8.0965	-14.3768
343		GlcNAca1-4Galb1-4GlcNAcb1-3Galb1-4(Fuca1-3)GlcNAcb1-3Galb1-4(Fuca1-3)GlcNAcb-Sp0	2142.78	1476.75	639.944	30.748	4.24545	28.6798	12182.2	7313.85	923.879	44.66	33.4578	17.3809	9.9152	457.56	566.792	5.15632	15.0735	8.7119	96.0267	46.1798	78.0413	14510.3	10078	5886.76	2182.54	363.451	11.1873	-0.27105	-10.594	424.397	24.2088	6.3276	-9.255	-37.4661	-1.23655	-14.0222
344		GlcNAca1-4Galb1-4GlcNAcb1-3Galb1-4GlcNAcb-Sp0	1225.28	491.726	37.5695	2.39575	-1.82895	-7.82775	38176.3	37521.1	4323.29	83.8161	130.901	6.28232	583.759	278.405	238.051	-0.1758	-2.23418	-7.7314	15.575	0.47005	47.9378	15376.6	19495.6	11024.6	1326.99	2876.33	-13.2673	-2.91532	-9.6704	131.06	4.58242	0.1864	-24.2051	-46.242	-7.07313	-19.1891
345	GlcNAca1-4Galb like	GlcNAca1-4Galb1-3GalNAc-Sp14	-5.06098	-34.2496	117.379	7.7515	-1.2017	1.02152	2279.44	61.3916	66.8229	-4.95812	0.8896	50.5683	-131.237	551.469	300.333	4.03558	1.5417	-11.1085	18.5428	34.7384	51.5778	15380.4	11065.2	7445.26	2359.36	-0.7987	-20.3225	-0.707675	-7.67665	116.678	10.9776	9.3744	-9.48418	1.55823	6.49185	10.4868
346	A1?	Neu5Aca2-6Galb1-4GlcNAcb1-2Mana1-6(Mana1-3)Manb1-4GlcNAcb1-4GlcNAc-Sp12	58407.5	32341.9	6259.16	100.509	143.469	6.1995	6.05512	6.71162	-2.28948	7.4399	-2.61335	8.77548	43812.3	25218.9	36697.7	7652.48	7428.48	2331.04	63.4174	2.82155	24.6227	-4.0547	2.98998	3.84858	8.06963	-14.2758	-40.8385	-0.1402	-18.2108	4.0026	6.85302	1.96122	-12.5439	-7.78667	-1.37225	-2.82735
347	A1?	Mana1-6(Neu5Aca2-6Galb1-4GlcNAcb1-2Mana1-3)Manb1-4GlcNAcb1-4GlcNAc-Sp12	35812.9	35347.2	23160.6	909.263	1750.88	85.4534	1.0311	14.3089	20.7311	16.1837	10.8188	7.42782	40641.2	29254.7	38116.8	10828	12805.4	4224.14	39.2727	8.95683	52.7517	-1.1323	15.4192	9.84623	1.289	-16.0404	-22.1936	4.3202	2.67588	20.1051	11.504	1.56777	-16.3135	-31.784	0.764225	-8.0082
348	A1?	Neu5Aca2-6Galb1-4GlcNAcb1-2Mana1-6Manb1-4GlcNAcb1-4GlcNAc-Sp12	44.164	2.13268	62.9441	2.37473	-2.40355	6.61922	-0.51445	-2.19048	4.09075	5.48227	-6.68215	8.2403	39573.8	28372.7	40117.2	7390.41	8402.89	2630.22	-2.59912	-9.44497	-5.14885	-0.959475	5.19373	6.52953	4.70645	-36.3463	-34.0221	-6.81735	-16.1827	10.8062	10.9959	-2.85593	-28.1002	-62.5133	-16.5885	-13.8472
349	A1?	Neu5Aca2-6Galb1-4GlcNAcb1-2Mana1-3Manb1-4GlcNAcb1-4GlcNAc-Sp12	48.5553	17.0931	22.6873	3.77358	3.6465	7.35183	25.3611	13.5938	6.7031	1.87425	3.91135	15.7315	3345.48	30714.7	35984.4	17725.5	13138.5	5072.57	-4.29827	-2.57165	5.03615	3.49928	5.72603	9.3472	7.82743	-0.59025	-11.8076	-5.7455	-12.2235	28.0491	12.2357	4.08888	-5.05328	-26.0004	9.56605	-2.52553
350	NA1?	Galb1-4GlcNAcb1-2Mana1-3Manb1-4GlcNAcb1-4GlcNAc-Sp12	725.1	-67.8228	12.1547	-7.62143	-13.2962	-1.92993	598.868	10.408	35.0316	-5.61802	-0.114975	6.05345	148.236	-139.015	764.449	12.2465	-7.60792	-7.56567	-9.5322	0.407225	9.51398	-2.73113	8.1228	8.96975	2.02172	2.51512	0.036075	-2.28298	-10.9325	36966.7	12886.4	2339.33	-12.2361	-28.6483	2.3651	-9.67487
351	NA1?	Galb1-4GlcNAcb1-2Mana1-6Manb1-4GlcNAcb1-4GlcNAc-Sp12	45.1139	64.7128	19.0043	-7.47772	-4.03457	0.54565	-15.4864	-1.6649	-1.32118	5.81752	-5.47928	9.7636	113.17	-30.8624	477.015	-9.89535	-3.48842	-10.1301	-9.23298	9.93117	5.8618	4.1369	5.27645	7.0115	2.59093	4.7762	-18.6617	-3.1445	-15.1244	29310.5	6433.98	549.35	-9.45305	-1.53905	-4.73597	-4.20182
352	NA1?	Mana1-6(Galb1-4GlcNAcb1-2Mana1-3)Manb1-4GlcNAcb1-4GlcNAcb-Sp12	39137.3	24939	33134.6	3990.74	2490.29	98.5139	-21.5339	-1.46137	16.4642	-3.32915	1.63567	-2.78392	1.64118	623.623	617.94	-0.309275	-2.52753	-5.0377	-4.13815	8.01507	-3.73838	0.734575	6.82758	5.50738	10.6839	-14.5478	2.1941	0.80725	-0.732825	34617.8	12163.6	1918.77	-14.5165	-19.8612	-3.58282	-23.2702
353	NGAF2	GlcNAcb1-2Mana1-6(GlcNAcb1-2Mana1-3)Manb1-4GlcNAcb1-4(Fuca1-6)GlcNAcb-Sp22	42532	30732.1	5946.53	585.04	465.953	33.4581	13.6141	-0.4092	7.49518	-10.3723	16.6094	7.14728	15032	17226.3	2473.13	42.2329	7.68367	-5.92577	6.85238	12.309	8.51648	4.16343	10.3773	17.57	3.6291	-11.3791	-9.40265	-8.0447	-5.4261	7.71838	13.277	7.27202	6.7593	-16.8737	1.21663	20.0266
354	NAF2	Galb1-4GlcNAcb1-2Mana1-6(Galb1-4GlcNAcb1-2Mana1-3)Manb1-4GlcNAcb1-4(Fuca1-6)GlcNAcb-Sp22	44830.8	32566	4241.16	200.951	55.3262	-12.6783	-15.7465	3.1573	-21.614	8.2218	1.75562	4.2277	16710.5	30543.6	3803.69	124.418	37.2683	-9.56835	19.6816	10.6519	29.5786	3.94165	13.4844	17.6774	23.0822	-16.7404	-34.1264	-13.4086	-18.4646	22527.8	8405.59	2005.56	-1.9556	-26.6325	7.78637	-1.31775
355	LeC--	Galb1-3GlcNAcb1-2Mana1-6(Galb1-3GlcNAcb1-2Mana1-3)Manb1-4GlcNAcb1-4(Fuca1-6)GlcNAcb-Sp22	40352.9	32915.1	8079.3	556.557	481.008	63.1197	-6.71147	-13.4639	16.5857	11.9571	0.400575	15.8129	21187.6	31775.6	4536.66	139.913	40.8753	25.1642	15.035	17.3758	19.5605	1.64213	6.47412	8.21167	9.16858	-6.48135	-7.86593	-8.07465	1.25895	3288.41	349.499	92.4019	-5.34367	-34.7595	7.29857	-9.68557
356		(6S)GlcNAcb1-3Galb1-4GlcNAcb-Sp0	-104.969	-34.9256	18.7462	-4.82283	6.601	10.9972	117.468	-6.43337	-0.384425	-6.67013	0.9997	-2.34145	-191.247	-2.03043	329.875	11.4119	-5.56718	-12.3028	3.8619	3.21343	21.3768	3.44545	7.26355	4.71317	12.0659	1.86065	-15.4317	-9.97978	-15.6703	32143.9	7524.89	1191.34	-11.0076	-20.2292	-0.372025	-22.4703
357		KDNa2-3Galb1-4(Fuca1-3)GlcNAc-Sp0	-81.8905	-12.9916	78.9308	6.16815	-8.49555	7.35605	-26.9322	1.23632	25.5194	-2.02343	1.06367	16.6123	-10.1517	5.33475	582.082	-3.11715	7.32367	3.55765	201.746	23.9854	70.9209	-1.42075	7.95043	15.5545	18.0171	-1.66582	5.3433	-2.92277	7.22225	19.2641	22.068	6.78407	-7.24403	-14.4209	-1.38692	-1.48208
358	6'KDN-LacNAc	KDNa2-6Galb1-4GlcNAc-Sp0	-171.145	-109.316	3.8801	-14.4026	-13.6257	0.045625	-30.4158	-4.45253	11.6475	-10.3879	-0.7297	8.2861	31522.2	41312.6	38319.6	12483	9910.75	7126.73	55.5245	34.9458	48.131	4.1421	9.32912	3.1346	4.07235	-11.7217	-18.8269	-8.16382	-12.1441	192.479	55.313	8.17635	5.6052	-26.347	-5.01725	-15.8467
359	3'KDN-Lac	KDNa2-3Galb1-4Glc-Sp0	-93.0746	-30.6022	80.6817	3.57795	-7.7514	29.6817	-17.8664	10.589	8.99892	7.87702	15.4123	9.0328	-149.736	1709.76	278.392	13.4826	-6.68983	-5.7114	153.696	24.5188	42.4044	4.71373	15.0156	6.62805	18.9339	-11.0053	-3.87037	-1.5524	4.5886	4.07215	37.6771	7.22008	-4.48848	-17.1578	-9.85867	0.154825
360		KDNa2-3Galb1-3GalNAca-Sp14	2185.64	1186.21	239.736	3.0728	-1.53422	-5.51425	-18.967	-13.1754	7.64552	16.1405	6.12647	11.2784	11018.9	19917.1	3007.14	27.8882	-3.21497	-1.29905	66.2708	7.04407	43.9297	3.809	12.4542	8.05457	23.1606	-8.54102	3.2478	-1.57408	1.6148	282.123	178.409	27.4639	-8.64072	-31.0357	-3.26387	14.8479
361	BG-H1-Man3	Fuca1-2Galb1-3GlcNAcb1-2Mana1-6(Fuca1-2Galb1-3GlcNAcb1-2Mana1-3)Manb1-4GlcNAcb1-4GlcNAcb-Sp20	21541.3	10210.9	1527.51	66.1859	65.4293	41.1232	-10.4759	7.31273	52.7547	3.29575	21.1357	51.7442	-143.601	943.308	339.914	22.4418	15.2242	-5.09058	213.17	44.7529	142.299	17.3453	27.0315	27.6197	11.158	3.9327	-18.9764	10.109	15.5957	61.3826	74.2654	50.5628	6.78833	-0.200675	8.26602	0.0646
362	BG-H2--	Fuca1-2Galb1-4GlcNAcb1-2Mana1-6(Fuca1-2Galb1-4GlcNAcb1-2Mana1-3)Manb1-4GlcNAcb1-4GlcNAcb-Sp20	25728.2	16162.8	1150.21	18.4126	7.3196	7.53207	-14.8934	-11.4213	10.0927	7.39092	1.02392	7.30152	971.517	1590.68	221.358	16.6441	-1.92185	-17.0181	-0.571225	5.29605	11.3318	0.600275	22.7987	7.95772	21.8779	-29.9472	-7.74515	-0.887675	-4.78898	3214.8	445.824	130.397	-22.2451	-42.2462	5.08837	-5.51398
363	LeY--	Fuca1-2Galb1-4(Fuca1-3)GlcNAcb1-2Mana1-6(Fuca1-2Galb1-4(Fuca1-3)GlcNAcb1-2Mana1-3)Manb1-4GlcNAcb1-4GlcNAb-Sp20	608.785	138.523	79.7921	27.8637	18.2493	36.4792	-7.1276	26.1355	42.8162	9.81417	2.7835	41.6593	249.847	471.865	197.824	25.17	11.3012	16.2826	73.9828	35.4788	90.7301	15.8152	18.3851	16.4237	22.0808	-34.4707	0.854575	7.01545	15.3664	252.469	1.12955	5.7576	-15.3811	-19.6379	3.94522	0.807275
364		Gala1-3Galb1-4GlcNAcb1-2Mana1-6(Gala1-3Galb1-4GlcNAcb1-2Mana1-3)Manb1-4GlcNAcb1-4GlcNAcb-Sp20	42513.7	34081.2	5962.31	139.302	250.293	17.2816	-6.35272	6.83732	2.34092	19.0948	-4.43277	9.63775	-49.3102	61.0356	117.786	12.6786	-3.93075	-4.73427	37.7057	19.7078	64.6322	5.693	14.5711	17.4048	6.56035	-15.7197	-13.6652	7.49085	-9.47523	18589.5	4745.12	972.066	-28.5583	-29.8517	-6.6535	-13.806
365	NA1?	Galb1-4GlcNAcb1-2Mana1-6(Mana1-3)Manb1-4GlcNAcb1-4GlcNAcb-Sp12	32713.4	31304.4	6366.41	158.767	527.941	4.77675	-3.85872	-9.33227	1.54488	-4.4391	-9.95375	15.5022	-341.909	641.149	68.5022	-14.3109	1.50078	-15.7622	49.4212	7.2911	22.5246	-2.252	21.346	8.05265	8.60645	-36.6515	-44.3042	-14.546	-22.7805	19252.3	1.19035	4.33675	-13.68	-58.5375	-12.9661	-18.3492
366	LeA--	Fuca1-4(Galb1-3)GlcNAcb1-2Mana1-6(Fuca1-4(Galb1-3)GlcNAcb1-2Mana1-3)Manb1-4GlcNAcb1-4(Fuca1-6)GlcNAcb-Sp22	41588	34344.5	11498.3	472.784	747.552	58.9914	4.41818	-8.25472	37.0452	9.14163	9.53132	21.6524	5156.38	27993.3	488.08	42.9607	22.6539	-6.42715	110.131	43.7482	73.053	32.3678	34.1445	18.8734	19.163	4.70435	-7.5765	-2.32237	7.6522	52.4651	53.8086	76.3551	-7.6269	-17.1197	-4.27393	-6.0311
367		Neu5Aca2-6GlcNAcb1-4GlcNAc-Sp21	-66.5412	-87.6824	-8.45323	-3.94845	-8.96075	-12.3999	40060.3	37143.1	5398.35	88.0766	127.801	-3.1876	1680.87	-66.1966	568.461	-7.6566	1.51578	-13.0617	13.1808	-2.5475	-1.78722	-1.5969	7.34652	4.8043	6.51753	308.851	-33.454	-15.5377	-21.1945	133.964	4.00633	0.3574	-38.9469	-84.1806	-19.3997	-22.9962
368		Neu5Aca2-6GlcNAcb1-4GlcNAcb1-4GlcNAc-Sp21	-54.9722	-44.171	20.6943	1.2214	-2.42437	-9.10922	39218.1	39538.8	7050.09	158.871	20.5056	14.8501	-7.7555	376.492	96.2422	8.4572	-3.77202	-15.7367	-4.04785	-7.32915	26.7843	2.10727	3.87798	5.35935	1.7289	945.383	-26.9834	-6.85442	-24.4684	692.899	2.86637	1.3174	-27.4523	-26.6478	-6.50768	-11.9697
369	BG-H1/LeX	Galb1-4(Fuca1-3)GlcNAcb1-6(Fuca1-2Galb1-4GlcNAcb1-3)Galb1-4Glc-Sp21	96.7702	84.0281	12.8471	6.2731	-1.66693	12.9154	-2.79877	69.2641	8.43827	7.03557	-0.60555	6.81178	-143.549	644.414	318.047	-8.09298	1.9929	-2.74392	140.839	8.17815	108.898	1.55648	9.01062	15.3087	1.83937	-12.5269	-26.9387	2.41097	-16.9232	2449.1	4.02253	-1.5382	-28.5879	-45.7781	5.38475	10.3922
370	NA3	Galb1-4GlcNAcb1-2Mana1-6(Galb1-4GlcNAcb1-4(Galb1-4GlcNAcb1-2)Mana1-3)Manb1-4GlcNAcb1-4GlcNAc-Sp21	8079.25	3408.83	224.028	20.0314	-0.06645	13.5707	9.80253	-1.62102	22.7455	12.6883	25.9599	15.997	2199.76	1839.76	450.844	-0.464225	2.30912	-3.236	238.408	22.2558	113.077	2.49968	10.578	6.9483	9.66887	-9.90503	-23.0202	-5.52148	7.08162	38632.2	25425.2	10546.4	84.8845	-33.8836	10.3783	-16.2984
371	BG-A2--	GalNAca1-3(Fuca1-2)Galb1-4GlcNAcb1-2Mana1-6(GalNAca1-3(Fuca1-2)Galb1-4GlcNAcb1-2Mana1-3)Manb1-4GlcNAcb1-4GlcNAcb-Sp20	12988.2	6552.72	187.625	7.6363	-4.291	5.0466	38.8655	13.0203	2.77873	-1.59165	13.9446	3.68257	2168.39	2047.24	244.631	-6.97038	-12.2062	-2.90997	3.90543	-12.2884	11.0796	26480.7	31081.9	21969.1	3192.21	-39.9665	-48.9473	-18.8545	-26.268	92.2668	27.8985	41.811	-32.4623	-76.9352	6.03723	-36.544
372	BG-B2--	Gala1-3(Fuca1-2)Galb1-4GlcNAcb1-2Mana1-6(Gala1-3(Fuca1-2)Galb1-4GlcNAcb1-2Mana1-3)Manb1-4GlcNAcb1-4GlcNAcb-Sp20	27109.7	11992	511.395	14.2878	25.3162	-0.639075	13.1467	5.44862	3.8687	3.8745	6.15353	25.0755	67.5809	1683.51	127.965	5.86903	-6.98135	-5.1482	38.23	13.6573	2.79845	-1.12495	14.3199	19.734	4.43207	-9.2949	-14.3224	-3.31028	-16.0822	1832.84	208.518	90.7969	-13.302	-44.176	0.575	2.83592
373		Gala1-3Galb1-4(Fuca1-3)GlcNAcb1-2Mana1-6(Gala1-3Galb1-4(Fuca1-3)GlcNAcb1-2Mana1-3)Manb1-4GlcNAcb1-4GlcNAcb-Sp20	13682	5042.69	350.04	2.44605	-10.1145	-49.1513	-17.4877	-0.4014	-47.2341	12.0004	-4.81268	-27.6093	69.4846	-45.0155	1603.48	-12.8244	-3.27702	-67.5788	-19.6416	-11.2762	12.4404	-0.766925	32.1887	39.0429	7.71035	-51.37	-7.59497	-29.2507	-11.2612	16563.8	7.55843	14.7596	-33.9082	-61.1104	-9.28995	-23.7443
374	BG-A1--	GalNAca1-3(Fuca1-2)Galb1-3GlcNAcb1-2Mana1-6(GalNAca1-3(Fuca1-2)Galb1-3GlcNAcb1-2Mana1-3)Manb1-4GlcNAcb1-4GlcNAcb-Sp20	8174.34	2946.23	439.958	22.7505	-1.15513	6.30538	-5.74752	283.511	3.43348	-0.776775	14.3128	4.77895	39.7779	33.1603	393.155	0.60195	3.01575	-1.44072	-5.26555	0.598425	-11.0659	16137.7	20802.4	13662.8	2508.04	-12.2674	-2.68458	-0.604525	12.9449	25.3208	7.8074	5.16315	-18.3609	-16.4352	-6.54883	-6.98917
375	BG-B1--	Gala1-3(Fuca1-2)Galb1-3GlcNAcb1-2Mana1-6(Gala1-3(Fuca1-2)Galb1-3GlcNAcb1-2Mana1-3)Manb1-4GlcNAcb1-4GlcNAcb-Sp20	15798.5	5114.48	840.814	22.8648	18.6126	3.07703	-13.1117	0.574325	7.80642	-5.6402	11.3931	1.0139	199.32	-61.2961	428.756	-4.9482	-2.3284	-11.3889	-1.33405	10.072	-7.37073	-3.56278	13.8158	4.32853	4.46343	-25.1939	-13.0956	-2.45158	-14.4776	7.64535	7.52525	5.59	-11.6626	-19.1648	-2.53118	-7.11953
376	LeB--	Fuca1-4(Fuca1-2Galb1-3)GlcNAcb1-2Mana1-3(Fuca1-4(Fuca1-2Galb1-3)GlcNAcb1-2Mana1-3)Manb1-4GlcNAcb1-4GlcNAcb-Sp19	1406.32	675.724	194.948	9.06667	14.1939	38.8619	10.3392	-7.96847	51.813	12.6955	9.52295	32.9777	94.0931	-157.009	2208.32	19.4269	28.3863	6.08178	4.49607	28.0906	20.9169	3.3673	17.8966	17.9747	12.3218	-2.59497	16.4579	2.66468	16.14	33.3935	49.0066	46.2597	-15.906	-2.11085	-0.455275	7.08328
377	3'SLacNAc --	Neu5Aca2-3Galb1-4GlcNAcb1-3GalNAc-Sp14	-72.0383	-56.1805	-11.2715	-11.7135	1.15747	-0.962675	-26.9773	-18.0668	0.483075	-1.73267	1.31763	-10.2897	-89.0153	-98.7855	971.84	-11.7325	-1.49335	-7.88363	10045.9	2757.15	193.246	-7.576	6.10365	15.9541	11.381	2.84137	-8.34717	-6.97478	-18.4636	28.2177	4.6729	3.25607	-9.99238	-42.1632	-10.564	-12.9386
378	3'SLacNAc --	Neu5Aca2-6Galb1-4GlcNAcb1-3GalNAc-Sp14	194.491	132.513	67.7153	-7.52937	-5.97067	3.31352	-14.9893	-16.0164	-2.22275	4.1465	-7.83695	0.3081	27943.8	31109.1	21182.5	3651.23	1381.35	951.483	-5.94308	7.92055	-1.58745	71.0014	47.4389	13.655	21.1125	-7.7703	-5.83212	-9.6982	0.256775	10.6371	7.13223	19.7438	-22.0679	-13.8503	-9.35897	4.88825
379	SLeX	Neu5Aca2-3Galb1-4(Fuca1-3)GlcNAcb1-3GalNAca-Sp14	-65.9165	-42.1883	74.4374	10.4844	3.65445	31.3914	-21.2812	54.9847	33.7794	9.70025	20.584	28.4393	-74.9271	167.094	1656.01	12.3605	11.7966	-2.4557	75.4541	71.9143	27.1335	20.1947	41.5953	38.0542	33.6348	6.00708	23.4016	-8.94237	-6.70332	41.3161	55.417	20.504	-32.3515	-22.412	6.13045	-11.2655
380	LDN--Man3	GalNAcb1-4GlcNAcb1-2Mana1-6(GalNAcb1-4GlcNAcb1-2Mana1-3)Manb1-4GlcNAcb1-4GlcNAc-Sp12	21835.4	9725.1	1631.19	306.662	288.502	152.614	6808.31	2831.39	692.051	309.333	231.396	127.331	321.112	29.0177	480.353	270.095	240.447	424.149	56.8808	114.098	37.1466	66.8074	60.0791	70.8991	74.9678	1258.77	418.4	217.822	318.979	1449.2	169.745	76.6781	5497.56	581.614	293.35	368.112
381	Tfdi	Galb1-3GalNAca1-3(Fuca1-2)Galb1-4Glc-Sp0	-102.136	-79.6005	-19.5124	-10.2434	3.6632	1.10368	-7.74235	16.6083	-7.36245	2.1577	6.66485	-5.25362	-36.3594	-38.4128	548.118	2.33823	-6.7144	-11.4612	-5.24525	0.080975	19.8402	0.9765	4.11128	2.21335	4.86577	8984.19	1157.88	-3.542	-30.4387	61.6504	35.2275	5.60828	-0.04195	-50.5224	18.2825	-14.0369
382	Tfdi	Galb1-3GalNAca1-3(Fuca1-2)Galb1-4GlcNAc-Sp0	-79.9714	-12.3795	85.2826	-7.69745	-3.56778	4.49648	-0.516225	-12.8126	-18.3927	-17.3118	-5.71298	-0.593275	-84.235	16.5815	108.325	-6.44397	-0.2474	-18.8394	-1.3559	12.921	17.2047	2103.67	1124.85	120.557	11.3238	13101	1850.11	6.36747	-10.6632	179.284	30.0446	14.3908	-20.8847	-43.1703	6.88782	-18.8288
383	iLNO	Galb1-3GlcNacb1-3Galb1-4GlcNacb1-6(Galb1-3GlcNacb1-3)Galb1-4Glcb-Sp0	-92.319	32.4935	3.1359	-1.77157	1.3448	-9.23782	-8.29752	6.2981	-15.9791	-2.71855	7.9124	-0.5355	-95.3841	-34.8931	300.42	-9.87475	-3.0594	-25.1163	16.7559	5.0396	44.3274	-4.16905	5.58952	4.0456	8.15825	-17.6674	-24.4099	-8.07532	-18.2918	16093.7	2016.72	274.17	-25.8351	-93.8162	-8.21875	-15.6346
384	LeC/LeX	Galb1-4(Fuca1-3)GlcNAcb1-6(Galb1-3GlcNAcb1-3)Galb1-4Glc-Sp21	-138.273	-32.5837	25.9737	2.16778	-2.60068	4.2956	-20.2963	29.8503	-2.0445	-1.6192	12.4584	6.2459	24.9667	239.655	56.0405	-1.2336	1.98295	2.0684	86.359	24.0265	27.611	-0.429275	16.4217	14.0822	9.31478	-29.3198	-6.44612	14.4657	-2.9879	4948.95	556.515	81.0376	-21.3863	-14.646	-6.13773	2.32323
385	DFLNHc, LacNAc/LeB	Galb1-4GlcNAcb1-6(Fuca1-4(Fuca1-2Galb1-3)GlcNAcb1-3)Galb1-4Glc-Sp21	1959.57	1168.03	142.451	6.81457	14.9282	-1.16927	3.66613	-3.36825	21.1876	5.22878	4.8262	9.74028	392.922	577.073	82.6807	-2.48195	7.0378	-4.4367	7.07288	1.85062	-5.52295	4.1419	14.9543	6.3389	0.897825	-16.1679	-10.4308	10.9639	-6.2679	24719.3	8472.57	1536.04	-7.05442	-13.2235	-10.7247	-9.30392
386	LeB/LeX	Galb1-4(Fuca1-3)GlcNAcb1-6(Fuca1-4(Fuca1-2Galb1-3)GlcNAcb1-3)Galb1-4Glc-Sp21	120.048	16.2562	7.06813	-2.6751	4.10577	8.87357	-5.37533	-15.6769	-2.99882	-3.0432	-0.37895	-0.78855	-7.0698	-87.6792	32.3684	-2.1078	-7.72748	-14.7812	2.993	-7.1299	-11.7349	-5.33328	5.01678	7.17807	3.44677	-19.9715	-21.6028	-4.88555	-7.38025	10874.9	1017.99	303.075	-24.1748	-10.4746	-11.6359	-12.4435
387	MFiLNO	Galb1-3GlcNAcb1-3Galb1-4(Fuca1-3)GlcNAcb1-6(Galb1-3GlcNAcb1-3)Galb1-4Glc-Sp21	-11.6184	71.1757	25.0734	9.69992	3.44402	20.7111	8.07653	-5.2531	3.9784	9.39152	-0.96215	30.2294	46.1904	-106.363	37.4158	7.7997	-2.2477	-11.8995	2.49992	8.23363	20.6981	-6.27463	8.76308	3.21048	9.99863	-19.0983	-18.0899	2.1811	-2.17437	15236	1999.76	339.247	-10.3356	1.84772	3.54535	3.84175
388	NA4	Galb1-4GlcNacb1-6(Galb1-4GlcNacb1-2)Mana1-6(Galb1-4GlcNacb1-4(Galb1-4GlcNacb1-2)Mana1-3)Manb1-4GlcNacb1-4GlcNacb-Sp21	9989.58	7309.04	874.446	76.4884	107.631	10.5093	-10.3892	-11.7096	9.0387	-9.19195	-0.772325	1.14952	597.362	1249.81	31.0207	4.20785	3.3053	-13.6088	31.2675	0.559825	-3.50073	-0.426975	12.2636	6.68187	8.83635	1.8263	-5.43865	-2.3445	-4.83755	40204.1	41863.6	13040.8	362.877	-28.6287	-2.69168	-12.8818
389	NGA3	GlcNacb1-2Mana1-6(GlcNacb1-4(GlcNacb1-2)Mana1-3)Manb1-4GlcNacb1-4GlcNac-Sp21	13732.3	7628.83	504.636	14.6079	4.52835	3.36547	-12.0025	9.5198	9.37773	10.6141	-1.54972	8.26497	-36.3488	-39.0343	62.6095	-2.3164	4.66863	-5.07585	-3.2715	13.6523	20.9998	23.7455	6.8287	0.399375	6.60337	-6.81432	-6.33485	-12.632	-7.81578	2602.26	328.7	74.1025	-16.4267	-15.8864	0.296275	-23.842
390	BG-H3--	Fuca1-2Galb1-3GalNAca1-3(Fuca1-2)Galb1-4Glcb-Sp0	-33.3173	-13.6089	2.75323	12.3084	4.81777	4.8925	-22.2262	-6.10858	2.69555	-12.8056	-1.59538	1.9789	848.168	3082.35	87.5084	-4.86508	-2.1071	0.09025	16.3125	3.00965	15.5422	11.92	10.6272	14.1623	3.92458	-29.0694	-11.803	-4.53472	-21.2266	8.40182	10.9143	28.9749	-35.646	-20.9774	-6.62288	-18.7193
391	BG-H3--	Fuca1-2Galb1-3GalNAca1-3(Fuca1-2)Galb1-4GlcNAcb-Sp0	-20.3938	-17.8131	23.7757	0.91775	5.49325	-1.4546	-11.3513	3.61682	3.01982	-12.0752	-4.4576	12.8768	221.242	311.421	190.591	-2.43503	5.56642	1.12683	-3.00875	-1.5515	5.24287	2574.91	2460.54	703.876	172.928	-7.88627	-4.2236	0.58515	-23.5376	12.9634	9.2232	14.1835	-18.8305	-26.435	-12.1348	-22.713
392	LeC--	Galb1-3GlcNAcb1-3GalNAca-Sp14	-22.5022	-12.7148	10.575	6.27753	-2.00842	8.25692	-24.6892	-24.8949	-3.80088	-4.32635	4.06183	-5.56747	-122.069	39.0626	99.6724	-5.9115	-0.983175	-9.72583	6.57615	0.8342	10.0923	-1.83593	2.40893	6.56627	2.70502	-50.7255	-32.6574	0.999475	-17.7847	111.551	50.3982	48.2066	-32.9042	-56.5397	20.2278	-14.1909
393		GalNAcb1-4(Neu5Aca2-3)Galb1-4GlcNAcb1-3GalNAca-Sp14	99.3476	40.7754	141.296	45.5142	36.3541	50.7024	-26.9865	5.66137	78.986	25.7811	24.867	72.8323	317.614	-27.4082	161.653	18.1813	16.8671	-21.0394	160.95	63.2779	148.599	17.6914	69.0613	54.6473	65.6779	-26.0672	5.3794	-6.9908	12.4012	53.002	77.4032	53.2204	-12.5707	3.16445	-4.74842	5.40375
394	BG-A3	GalNAca1-3(Fuca1-2)Galb1-3GalNAca1-3(Fuca1-2)Galb1-4GlcNAcb-Sp0	63.2906	-85.6996	10.4233	-7.04603	3.96348	5.8203	991.95	146.001	1.37075	-10.4451	0.5481	0.02795	-25.0659	564.397	-16.4512	2.86302	-6.4755	-24.3965	57.4972	23.7644	30.3636	19756.5	25725.5	19088.4	2544.08	-44.2011	-9.16782	-1.21913	-1.44458	2.2399	3.96905	16.199	-45.1534	-53.6132	-9.8399	-42.0125
395	N-	Gala1-3Galb1-3GlcNAcb1-2Mana1-6(Gala1-3Galb1-3GlcNAcb1-2Mana1-3)Manb1-4GlcNAcb1-4GlcNAc-Sp19	19323	9873.87	996.915	56.9981	45.2937	50.7885	-13.6952	-5.62867	52.9706	-3.64845	7.23197	52.449	-49.7407	259.103	333.116	21.5199	3.84485	-16.7696	573.636	176.295	468.75	8.5344	12.5255	8.7523	13.5008	36.0512	-3.36632	-0.580225	-0.053575	749.665	198.693	46.6744	-18.9889	-7.51665	-5.7966	22.3644
396	N-	Gala1-3Galb1-3(Fuca1-4)GlcNAcb1-2Mana1-6(Gala1-3Galb1-3(Fuca1-4)GlcNAcb1-2Mana1-3)Manb1-4GlcNAcb1-4GlcNAc-Sp19	36771.3	43344.4	4783.45	128.928	177.791	49.0005	-9.94877	-12.2471	33.0085	-1.78835	-8.71203	17.5958	-76.2995	526.519	166.449	10.9763	0.2442	0.908	328.676	136.187	294.891	2.0697	31.4857	16.4871	8.05567	-25.9934	22.3677	-14.9933	21.4234	1811.13	294.697	86.5436	-45.6964	-45.0199	-12.7579	-8.84088
397	A2	Neu5Aca2-3Galb1-3GlcNAcb1-2Mana1-6(Neu5Aca2-3Galb1-3GlcNAcb1-2Mana1-3)Manb1-4GlcNAcb1-4GlcNAc-Sp19	6530.6	3710.8	1054.54	13.3027	27.3927	-22.237	66.9986	3.35785	-41.7199	49.9793	4.63977	-9.70302	119.595	38.6068	2252.44	27.0992	18.7031	2.26767	4.89823	34.5357	27.8025	8.96082	14.3733	21.1268	23.3678	-11.4651	48.2256	6.68415	25.6683	36.5337	26.9124	9.6972	3.28885	15.0797	16.7333	18.0773
398		GlcNAcb1-2Mana1-6(Galb1-4GlcNAcb1-2Mana1-3)Manb1-4GlcNAcb1-4GlcNAc-Sp12	39380.1	40278.6	12925.4	1305.3	623.452	35.9027	-7.64537	28.259	2.45085	0.967025	1.38267	16.7391	113.237	-84.8039	272.601	-4.28658	-2.22423	23.8955	-2.3322	0.15345	-3.25967	1.15165	5.83338	7.21773	3.07063	-5.42075	-14.0378	-7.12448	-0.07075	33813.9	10678.8	1267.42	26.658	-11.0557	-1.63337	-0.871775
399	NA1B?	Galb1-4GlcNAcb1-2Mana1-6(GlcNAcb1-2Mana1-3)Manb1-4GlcNAcb1-4GlcNAc-Sp12	37441.3	30399	8480.36	621.732	318.031	3.10902	-17.7029	9.04327	4.42695	-2.934	2.86773	4.13547	212.48	-90.2339	519.409	13.6785	22.0593	-14.6195	-8.8611	-1.8653	3.1302	28.7869	48.0173	32.6041	23.0082	-6.16357	-15.7583	-5.41962	-8.31845	30333.8	5938.42	1484.89	-19.6941	-15.4706	-7.464	-9.07343
400	3'SLeC--	Neu5Aca2-3Galb1-3GlcNAcb1-3GalNAca-Sp14	232.802	-26.1663	24.3813	-1.00462	-5.31918	1.81418	-13.3418	2.66365	2.12137	-0.663	7.77555	9.36715	-11.8582	-117.734	572.24	5.55462	-3.19967	-3.9473	0.85085	-0.683125	3.05618	2.31037	16.7746	6.66667	12.6863	-7.86025	-6.45533	-3.33453	-8.75375	12.1487	8.99162	6.39662	-12.0748	-17.5102	-12.3037	-9.31475
401	BG-H2	Fuca1-2Galb1-4GlcNacb1-3GalNaca-Sp14	31.0158	-54.6919	20.4959	-7.7827	-5.03012	16.2888	-23.5595	-2.4666	-0.300025	6.90678	-0.451575	11.4839	-52.4509	-125.407	1858.84	10.921	4.625	-6.58472	10.2116	8.72795	4.4165	1.87272	13.8333	5.79527	8.21727	10.4096	-0.924925	-8.27465	4.32892	7.88115	5.53572	5.80842	-9.61325	-27.8058	3.30663	-10.5761
402	LeX--	Galb1-4(Fuca1-3)GlcNacb1-3GalNaca-Sp14	108.172	1.67115	46.2932	-3.5746	5.42855	4.89145	-20.8774	23.4623	10.6107	3.19413	26.0916	12.0347	-28.3715	71.2083	1222.33	3.74268	-2.31738	-11.6976	10.6497	16.6591	14.4598	3.21542	14.5605	1.0353	3.41303	-4.6049	9.42665	-3.02567	-1.096	0.863175	14.5848	7.50885	-11.8539	9.54352	2.16672	3.05678
403	Forssman-like	GalNaca1-3GalNacb1-3Gala1-4Galb1-4GlcNacb-Sp0	-99.8533	-44.8074	16.5835	4.26305	-0.7588	-2.93283	60.0752	-4.25903	5.98047	-11.5692	3.45545	-5.31072	-69.7964	54.2902	155.883	-0.822175	0.842475	-21.0473	-7.8117	-1.51052	5.51183	20438.4	23340.5	18307.3	3909.83	-10.8527	-19.7487	-16.7178	-15.909	6.2462	2.59682	4.63262	29533	1899.87	10.8216	-34.8505
404		Gala1-4Galb1-3GlcNacb1-2Mana1-6(Gala1-4Galb1-3GlcNacb1-2Mana1-3)Manb1-4GlcNacb1-4GlcNacb-Sp19	40001.1	40020.7	15896	1290.96	755.102	64.3936	14.4597	18.0784	15.0663	-1.30263	2.71557	17.7387	423.342	-37.6313	520.693	1.64695	2.08905	-4.6817	4.53888	19.3293	11.2298	-3.52577	12.39	8.20995	8.06455	-7.86378	-9.12833	-4.02605	-2.51655	7972.8	1281.47	170.095	21640.1	1203.47	2.52712	-10.1334
405		Gala1-4Galb1-4GlcNacb1-2Mana1-6(Gala1-4Galb1-4GlcNacb1-2Mana1-3)Manb1-4GlcNacb1-4GlcNacb-Sp24	36857.9	42289.7	7596.97	307.936	101.85	-0.008275	-10.7064	38.6282	19.1944	0.170775	21.3428	-1.86678	-29.3261	211.84	661.276	22.3256	16.6566	-2.9884	14.3758	37.013	89.7753	13.4941	15.0437	11.8651	9.2655	-0.028025	-1.08773	-2.90288	-3.74865	12884.8	1792.75	368.353	183.325	-11.9457	8.67795	2.53665
406	alpha Gal like	Gala1-3Galb1-4GlcNacb1-3GalNaca-Sp14	83.8139	-30.1962	29.436	11.9004	-3.37532	6.01232	-23.1654	-1.87072	26.957	0.13015	-10.3382	0.40625	-48.9762	159.709	127.804	6.49905	-4.731	-10.5005	14.062	26.609	27.4752	-2.5337	4.758	7.24735	12.5611	-10.7066	-19.6522	-2.3045	-8.18648	34.291	23.1888	16.144	-16.0361	-30.0411	4.78095	-16.6073
407	LeC--	Galb1-3GlcNAcb1-6Galb1-4GlcNAcb-Sp0	-115.487	-4.96498	-3.592	-5.86647	-3.6044	-2.95842	-25.2623	5.0416	4.02358	-12.2457	4.50295	-1.90395	-166.241	-1.94312	105.104	-12.0765	-2.0176	-21.3105	-9.1368	19.0547	31.5568	-5.28343	11.866	-0.7339	-1.03452	-7.999	-33.3794	-13.8567	-14.5778	9129.71	1002.98	130.939	-10.5776	-70.9724	-7.27285	-22.5519
408	LeC--	Galb1-3GlcNAca1-6Galb1-4GlcNAcb-Sp0	-146.675	-9.54502	9.75947	-0.718175	-2.0743	3.35167	-27.2673	-4.82652	-1.77235	6.22048	-9.33718	9.074	104.947	484.904	80.6651	-12.0196	-4.0028	-12.4836	16.1782	5.69118	2.47875	-4.87732	2.83345	8.06962	13.3098	-4.00358	-20.7057	-3.48165	-19.6813	23989.1	2853.6	330.358	-8.73825	-35.6607	17.351	-15.2887
409		GalNAcb1-3Gala1-6Galb1-4Glcb-Sp8	-19.5199	28.0625	20.3614	0.6846	-3.37737	-2.34558	-2.9843	0.55635	11.1911	6.85575	11.3096	6.62905	195.087	-176.252	34.7957	-1.76642	2.50497	-0.9865	1.3979	-3.41905	-0.99195	2.85967	7.56818	14.7506	8.31772	-9.6334	-10.3324	4.9303	-1.34478	12.5428	14.5427	3.347	2755.37	-0.0581	7.20645	-13.3663
410	BG-B6	Gala1-3(Fuca1-2)Galb1-4(Fuca1-3)Glcb-Sp21	24.2872	43.6634	64.7629	8.21293	1.77605	8.65975	-0.7418	1.749	12.4522	5.2025	-1.03167	16.2054	-86.846	-147.068	34.2805	-0.074175	-2.5252	-2.74413	4.74238	-0.603375	-2.74088	-2.75887	4.04865	10.8783	10.0568	-12.9135	-17.8096	11.0485	-4.4265	7.7022	6.31902	10.759	-10.0896	1.20827	-2.33283	14.0626
411	MSLNH	Galb1-4GlcNAcb1-6(Neu5Aca2-6Galb1-3GlcNAcb1-3)Galb1-4Glc-Sp21	-23.6893	18.5237	8.9679	3.36907	-5.72982	0.276425	-7.69782	-15.6816	12.215	-8.28118	0.960875	9.79753	34840.5	33734.8	28372.5	4728.78	3546.85	1040.85	-3.66225	-0.080625	19.0008	0.666525	6.5578	4.4669	5.05232	-13.8668	-7.38727	3.91205	-0.043275	33457.4	16374.7	2257.65	-3.84128	-12.6894	7.08355	-18.1912
412	GD1b	Galb1-3GalNAcb1-4(Neu5Aca2-8Neu5Aca2-3)Galb1-4Glcb-Sp0	-11.6615	2.52367	129.663	3.23348	7.23425	0.693225	-19.8508	-6.07052	-5.0861	-4.72293	2.22782	3.5014	-105.113	-1.5403	16.9521	7.97215	2.0083	-4.192	0.05765	1.92057	-4.7905	1.41573	9.24742	4.06642	16.0992	-0.525375	-15.1014	-14.2184	-13.5844	14.7457	13.8444	13.406	-25.7995	-11.5172	4.69275	-19.6297
413		Neu5Aca2-3Galb1-3GalNAcb1-4(Neu5Aca2-8Neu5Aca2-3)Galb1-4Glcb-Sp0	14.6554	9.11485	46.2801	6.28305	-2.62445	11.2382	-6.8836	9.51597	7.91535	1.60678	-2.3895	2.6189	3.3706	-85.416	336.575	5.64897	7.22178	-7.20252	5.58442	-3.9904	6.60388	-2.0541	7.05132	5.76807	9.57343	-10.2769	6.51002	-3.75125	-1.6366	15.6191	2.62423	11.4013	-31.091	-15.6601	-8.68308	-14.444
414	BG-B2--	Gala1-3(Fuca1-2)Galb1-4GlcNAcb1-3GalNAca-Sp14	107.862	4.5589	33.0917	5.23288	-1.47417	0.478125	-17.5339	5.66565	1.40013	-3.12407	4.8229	10.0221	-131.325	95.0481	86.475	-7.0306	1.5872	-7.41107	23.7139	13.5328	13.8748	0.444175	7.19977	3.1012	7.65185	-31.7659	-2.62395	-10.9434	-19.4094	19.9271	11.5867	6.81163	-34.1474	-20.7136	1.07498	-5.75327
415	BG-A2--	GalNAca1-3(Fuca1-2)Galb1-4GlcNAcb1-3GalNAca-Sp14	-32.3345	-8.02887	56.6063	0.096975	-1.14663	7.8669	-15.0602	-0.61215	9.85063	0.744925	2.68243	6.20013	-60.7396	-86.9897	435.879	-1.13375	-3.1147	-12.1125	-3.78852	28.1573	5.20533	9949.24	9324.49	6651.57	2866.78	-15.949	-18.4241	-3.26812	-6.4975	8.93898	16.1319	8.09405	-17.6307	-23.3714	1.38315	-18.6417
416	Forssman	GalNAca1-3GalNAcb1-3Gala1-4Galb1-4Glcb-Sp0	-3.4682	-16.3691	-1.81137	-4.68887	2.42882	-7.16518	446.524	172.18	31.8509	1.76822	-7.7189	4.76173	-124.634	43.6446	31.4206	0.331575	-1.63185	9.03878	15.845	10.4237	29.4322	16519.2	25473.8	17065.9	1822.88	-21.9884	-6.55487	-3.10202	-10.9441	2.92313	6.38743	1.6072	26708.5	790.492	2.6466	-24.0652
417	LeYlike	Fuca1-2Galb1-4(Fuca1-3)GlcNAcb1-3GalNAca-Sp14	56.5568	126.493	301.336	28.0236	35.4092	41.8683	15.0871	76.5901	73.5133	23.9192	31.4741	43.134	3.20565	-73.3379	774.359	30.7482	51.7117	-9.32005	531.215	276.703	413.628	12.5716	30.3935	17.5638	18.2324	-3.56675	59.7584	3.86725	36.9064	13.2281	98.6332	39.6256	4.89223	70.5158	-12.1408	33.0479
418	BG-B2--	Gala1-3(Fuca1-2)Galb1-4(Fuca1-3)GlcNAcb1-3GalNAc-Sp14	22.972	-59.8239	11.71	3.15313	8.425	5.93123	-35.495	-3.47285	10.793	-9.57185	-7.1742	47.2929	303.27	45.8811	235.203	1.76205	-0.24395	-3.93947	205.714	159.555	313.2	1.4499	4.30167	10.9878	3.98658	-41.8057	-3.9013	-14.411	3.65398	2.30655	9.6471	15.513	-55.1266	-54.642	-9.65108	-8.01257
419	BG-A2--	GalNAca1-3(Fuca1-2)Galb1-4(Fuca1-3)GlcNAcb1-3GalNAc-Sp14	41.7849	-18.3872	160.374	18.357	17.2686	52.5586	-34.3678	29.7852	76.1946	10.4616	28.7886	53.4875	-96.2307	46.5108	601.315	8.93153	43.2536	-4.37667	786.355	346.921	568.718	467.073	628.896	172.094	63.6349	61.5604	24.449	-0.42355	29.5129	26.6226	28.6962	20.7112	0.550725	12.0382	-13.4147	36.2401
420	LeX--	Galb1-4(Fuca1-3)GlcNAcb1-2Mana1-6(Galb1-4(Fuca1-3)GlcNAcb1-2Mana1-3)Manb1-4GlcNAcb1-4(Fuca1-6)GlcNAcb-Sp22	193.211	-51.7271	141.125	18.5475	3.08472	7.29847	-15.6536	5.1675	32.9105	9.35308	-7.62175	18.7472	-101.347	394.81	234.451	-5.56565	8.616	2.6285	534.695	157.878	454.809	-2.16833	11.1377	-0.083225	10.379	-35.1845	-24.1977	-6.23187	-26.6367	104.693	73.6327	28.0596	-73.5117	-70.6097	-13.474	-11.7697
421	BG-H2 like	Fuca1-2Galb1-4GlcNAcb1-2Mana1-6(Fuca1-2Galb1-4GlcNAcb1-2Mana1-3)Manb1-4GlcNAcb1-4(Fuca1-6)GlcNAcb-Sp22	29669.7	13570.3	2678.31	193.835	6.49348	-17.9335	-13.8606	-26.7163	-18.1725	-4.16135	-4.98475	-4.75025	122.855	-167.373	1338.62	-21.7684	-12.2775	-25.3967	-3.78005	11.2956	-13.2312	13.6775	18.1701	9.53265	6.69388	-20.5783	-18.8997	-12.8509	-29.1357	216.436	41.9304	28.424	-17.5757	-26.0847	-8.1304	-26.0203
422	NGA3	GlcNAcb1-2(GlcNAcb1-6)Mana1-6(GlcNAcb1-2Mana1-3)Manb1-4GlcNAcb1-4GlcNAcb-Sp19	10863.3	3047.35	402.328	1.57205	-7.14145	2.06225	-15.7582	59.6387	31.6174	-2.51113	3.2773	11.4526	17.7135	-138.661	278.335	-0.693225	-7.24992	-16.7419	-0.943725	-2.10448	1.6018	-4.22083	5.88977	9.81355	12.3986	-18.7609	-14.9673	-7.245	-8.50378	18.8266	4.26377	8.81498	-29.3592	-15.0356	-11.9614	-9.35608
423	BG-H1	Fuca1-2Galb1-3GlcNAcb1-3GalNAc-Sp14	169.6	-33.264	24.9234	-4.9993	-11.7546	-11.3626	-35.1003	-12.6978	2.50125	-11.9259	-4.72325	8.27565	186.365	-162.306	1281.57	-16.704	-11.3182	-30.5766	3.10895	-3.94448	-7.53578	-8.8256	4.59443	1.38168	19.0783	-27.8767	-22.1381	-15.3427	-27.8423	4.47925	6.9811	2.96195	-25.4313	-53.5573	-19.0442	-28.0358
424	BG-B1	Gala1-3(Fuca1-2)Galb1-3GlcNAcb1-3GalNAc-Sp14	12.4882	-55.1587	32.6585	-12.4014	-3.11613	4.11037	-13.5989	-9.68058	1.06157	-6.89282	-4.70333	21.8288	47.4599	-115.785	248.65	-1.80567	-3.73567	-22.0906	-3.4571	-3.9367	-3.97133	-6.339	3.14015	4.07368	8.38168	-25.0174	-29.7273	-13.023	-22.4132	-1.32985	4.4834	17.0811	-28.5764	-22.9183	-11.1321	-18.3013
425	BG-A1	GalNAca1-3(Fuca1-2)Galb1-3GlcNAcb1-3GalNAc-Sp14	-183.868	-82.3068	38.9604	-7.69678	-8.90343	25.3364	-40.7707	5.32675	29.8242	7.75345	9.2985	14.9296	-147.943	99.5584	1928.18	-10.9714	-7.28237	-27.7943	-3.40967	15.625	3.8963	8408.83	8011.59	5906.59	1839.83	-12.4287	-11.3649	-14.4072	-22.0285	9.1891	15.6769	16.1898	-25.8308	-40.1808	-9.54705	-16.3279
426	Gala-type 1 like	Gala1-3Galb1-3GlcNAcb1-3GalNAc-Sp14	-103.454	-42.5754	40.6816	-12.7217	-5.88068	-6.18573	-45.4383	-26.6134	3.7136	-10.7897	3.8661	-4.0712	-18.6833	-38.8391	245.037	-10.0761	-6.8804	-18.2638	-6.3855	8.32425	-0.5584	-1.48863	8.44267	5.36877	2.25995	-23.7308	-19.6221	-14.8582	-7.45255	96.8845	38.8646	17.9069	-22.5573	-23.2992	3.15285	-8.35015
427	BG-H1-Man3F	Fuca1-2Galb1-3GlcNAcb1-2Mana1-6(Fuca1-2Galb1-3GlcNAcb1-2Mana1-3)Manb1-4GlcNAcb1-4(Fuca1-6)GlcNAcb-Sp22	24045	13474.8	2705.29	101.633	105.682	19.7939	-55.6164	-3.20093	6.5229	-6.50687	3.70085	2.71802	6160.75	10833.2	1605.32	-5.929	-7.05035	-27.3166	-6.24365	42.6059	18.3766	10.7501	22.3564	14.9547	2.21725	-21.8972	-15.656	-16.4646	-4.70287	35.9271	20.2845	19.0609	-27.1843	-41.3399	-2.80837	-25.7576
428	BG-B2 like	Gala1-3(Fuca1-2)Galb1-4GlcNAcb1-2Mana1-6(Gala1-3(Fuca1-2)Galb1-4GlcNAcb1-2Mana1-3)Manb1-4GlcNAcb1-4(Fuca1-6)GlcNAcb-Sp22	19106.2	11957.8	1966.85	51.4024	19.5741	-3.5998	-37.333	1.12288	12.0886	-7.03125	-5.48728	31.4977	89.6916	-120.242	771.44	-6.78755	-5.06377	-25.2041	11.2649	19.0819	18.7408	-0.301875	1.5449	14.2252	4.68197	-36.4888	-26.5805	-16.0219	4.11785	2.2702	14.5469	23.451	-27.833	-38.8984	-8.4574	1.37752
429	LeC--	Galb1-3GlcNAcb1-6(Galb1-3GlcNAcb1-2)Mana1-6(Galb1-3GlcNAcb1-2Mana1-3)Manb1-4GlcNAcb1-4GlcNAcb-Sp19	8775.75	3987.25	615.838	8.47712	5.67108	4.23747	-27.0973	-6.4574	-6.42905	-23.9586	-0.738725	-6.73505	-182.437	-86.0496	945.642	-7.38403	-9.61475	-7.73692	14.2787	14.7413	35.4234	-7.27185	5.14432	8.78008	6.79743	-32.5717	-35.2729	-5.6518	-22.8621	5846.68	699.052	183.081	-21.1485	-37.9343	-6.96955	-0.375225
430	MFLNH I	Galb1-4GlcNAcb1-6(Fuca1-2Galb1-3GlcNAcb1-3)Galb1-4Glc-Sp21	-93.4793	-98.0038	81.9143	-1.01983	-0.15125	8.78333	-22.515	-14.1365	0.8152	-7.34095	-5.88245	6.7853	27.9096	-40.5087	147.789	-5.95032	-4.39957	-12.4104	42.7856	11.9811	11.8627	-5.30585	2.45467	11.4302	-3.88352	-18.7891	-27.6599	-8.87613	-12.1024	42041.5	14425.6	1783.9	-35.6104	-50.49	-8.8558	-8.09267
431		Fuca1-3GlcNAcb1-6(Galb1-4GlcNAcb1-3)Galb1-4Glc-Sp21	-148.3	-72.7617	4.52252	-9.27275	-1.66542	1.75065	-36.5957	12.1432	-1.25995	-5.35635	-2.74582	13.8556	-143.376	143.233	362.424	-21.1732	8.54472	-30.6636	13.4655	12.3993	36.3676	12.1384	32.4977	21.0296	31.0873	-9.18617	-45.8951	-10.2725	1.10768	34523.5	10796.2	2181.88	-38.6681	-59.6442	-1.0632	-18.2636
432	NGA3	GlcNAcb1-2Mana1-6(GlcNAcb1-4)(GlcNAcb1-2Mana1-3)Manb1-4GlcNacb1-4GlcNAc-Sp21	36725.7	32026.4	6323.06	465.204	429.579	-4.66315	38652.3	15696.1	867.468	-0.595125	-11.2399	-3.29858	-161.417	-62.5217	75.76	-17.6824	-13.4415	-25.5332	86.7916	6.80167	21.5125	-11.473	7.16698	-3.89147	-3.32753	209.795	-23.1092	-6.1828	-17.8199	1173.42	11.8904	13.1925	-37.3071	-59.9949	-13.5673	-25.2872
433	NGA3B	GlcNAcb1-2Mana1-6(GlcNAcb1-4)(GlcNAcb1-4(GlcNAcb1-2)Mana1-3)Manb1-4GlcNAcb1-4GlcNAc-Sp21	370.333	141.968	30.5733	-7.39292	-0.58405	5.50432	78.8987	147.636	16.6613	-7.20683	-5.59593	-2.59732	7.61525	-128.404	-6.84625	-0.7927	-5.1158	-28.2403	4.89008	-0.7514	-14.5369	77.1778	15.3522	0.5848	10.7475	-15.9823	-13.919	-8.6898	-9.70998	39.8716	4.84735	9.61913	-24.8851	-16.4638	-10.8802	-16.6229
434	NGA3B	GlcNAcb1-6(GlcNAcb1-2)Mana1-6(GlcNAcb1-4)(GlcNAcb1-2Mana1-3)Manb1-4GlcNAcb1-4GlcNAc-Sp21	20239	10659.1	479.783	1.4348	-7.80578	4.7274	5554.11	3741.76	48.5925	14.4706	-1.4662	8.41525	-114.376	-7.35838	6.706	-2.5236	-5.2425	-21.2329	-2.19497	-10.3722	-25.0144	-2.9004	-0.38655	7.31265	4.52385	63.9571	-20.1151	1.38918	-6.4635	32.5606	5.93305	-0.1661	-28.561	-7.47618	-13.1423	6.45293
435	NGA4B	GlcNAcb1-6(GlcNAcb1-2)Mana1-6(GlcNAcb1-4)(GlcNAcb1-4(GlcNAcb1-2)Mana1-3)Manb1-4GlcNAcb1-4GlcNAc-Sp21	-84.3478	-14.3993	-2.78392	-0.01675	-10.8986	-0.2898	-25.9813	-25.7226	-7.66842	-10.4089	-18.3848	-3.8245	-53.5108	-62.6764	-4.99017	0.512375	-0.1608	-16.4861	-9.82947	8.88285	12.1019	106.155	3.7776	0.103825	19.2351	-26.1743	-26.8289	-20.8117	-27.3503	20.5125	8.59668	7.51802	-25.0526	-33.0532	-2.86485	-19.2728
436	NA2B	Galb1-4GlcNAcb1-2Mana1-6(GlcNAcb1-4)(Galb1-4GlcNAcb1-2Mana1-3)Manb1-4GlcNAcb1-4GlcNAc-Sp21	10467.5	6702.48	451.266	-1.89345	-3.43973	-5.88115	109.276	-10.7863	5.18692	-3.62085	-27.31	6.79753	-173.669	-29.6774	8.325	-8.01068	-5.63798	-20.5308	9.9342	-0.62535	-7.48632	-1.71487	9.09422	4.21252	9.28913	-26.0018	-29.2717	-21.9083	-27.0086	33458.5	23644	8842.95	-41.921	-38.5018	-14.3949	-15.6367
437	NA3B	Galb1-4GlcNAcb1-2Mana1-6(GlcNAcb1-4)(Galb1-4GlcNAcb1-4(Galb1-4GlcNAcb1-2)Mana1-3)Manb1-4GlcNAcb1-4GlcNAc-Sp21	4.81035	-16.7212	21.1322	7.92412	-5.3221	2.86297	-21.2479	-17.8915	-5.25783	-5.5092	-4.4121	8.087	46.5844	-63.8463	182.857	6.13525	1.68675	-17.9671	-3.95737	0.796975	12.1573	-4.22235	-1.0631	6.02183	3.10677	-35.6517	-31.1878	-4.65565	-16.2879	39864.7	38765.2	9716.71	-24.5758	-33.8302	-13.305	-41.2675
438	NA3B	Galb1-4GlcNAcb1-6(Galb1-4GlcNAcb1-2)Mana1-6(GlcNAcb1-4)(Galb1-4GlcNAcb1-2Mana1-3)Manb1-4GlcNAcb1-4GlcNAc-Sp21	111.452	-14.8667	73.4875	-4.0801	-5.99023	-3.08077	-39.3695	-9.80067	-3.7821	-5.84545	-17.5253	9.8424	-98.5457	13.7199	22.7068	2.62175	2.8887	-24.451	6.4403	-3.49785	25.4321	-1.98902	4.24715	6.57435	9.1587	-40.833	-48.7385	-19.6526	-20.6939	40134.6	25506.7	8915.84	-38.675	-31.2761	-15.3789	8.7286
439	NA4B	Galb1-4GlcNAcb1-6(Galb1-4GlcNAcb1-2)Mana1-6(GlcNAcb1-4)(Galb1-4GlcNAcb1-4(Galb1-4GlcNAcb1-2)Mana1-3)Manb1-4GlcNAcb1-4GlcNAc-Sp21	-75.4509	36.5968	43.0403	-4.5204	-7.91445	14.8264	-8.32227	-14.633	11.0012	-13.7943	10.7537	6.66808	-121.522	-80.1988	62.1044	20.1447	-11.4331	-19.3396	43.9367	22.7804	46.5937	-1.4745	4.67745	7.66472	7.57293	-23.8987	-23.9919	-11.0661	-14.7594	34164.1	38352.6	10712.8	-17.4066	-40.1717	-18.9727	-43.1426
440	Galb1-4Gal	Galb1-4Galb-Sp10	-46.6172	-80.578	41.4545	-6.2167	3.9847	-2.931	-31.5338	-22.322	9.23465	-11.8565	-16.4275	1.28425	-154.83	107.284	219.687	-1.43085	-1.87798	-35.5928	11.539	4.12073	47.9618	1.27978	10.356	9.73235	10.2727	-76.2889	-49.3426	-7.30747	-17.3931	48.8132	34.5297	14.6712	-59.9649	-56.0799	-3.47685	-27.6266
441		Galb1-6Galb-Sp10	-38.7567	72.8624	50.185	3.83425	-6.82845	8.40488	-27.3184	-2.59367	-19.4626	-8.95542	0.978275	-3.26025	-101.952	-72.4654	282.169	2.10347	-13.7429	-26.9351	12.9533	28.0391	56.1328	-6.20825	1.25372	5.53275	-1.83432	-24.3111	-34.481	-15.8062	-8.48288	26.9283	50.3289	7.82608	-42.6745	-41.4638	-20.874	-24.2194
442	Sia-LNnT	Neu5Aca2-3Galb1-4GlcNAcb1-3Galb-Sp8	-54.035	-108.135	5.74142	-6.80495	-3.2806	-23.4477	-42.2824	-14.6925	-1.7531	-9.19108	-9.0881	-5.96938	-97.0668	40.468	20.4002	-14.2952	-0.540075	-39.484	11080.6	2535.86	233.337	-5.4846	7.43458	3.1725	9.14095	-45.8334	-56.3732	-12.8079	-39.4993	6.80542	2.28575	7.026	-44.0212	-89.568	-28.3087	-40.6628
443		GalNAcb1-6GalNAcb-Sp8	-115.807	-36.8029	-7.87613	-7.5388	-7.006	-12.4857	697.822	64.7959	-0.5628	-17.6178	-9.93693	3.20105	-69.8724	-44.6316	63.3075	-2.73878	-11.2823	-26.5182	3.07957	-1.03845	24.3551	-6.77642	1.54673	-0.2861	1.54255	-26.4144	-39.0066	-7.4206	-21.4382	60.1538	6.74287	0.1087	-30.0653	-32.0811	-19.2357	-23.5745
444	6'Su-LeC	(6S)Galb1-3GlcNAcb-Sp0	-43.9096	-79.4296	-22.8893	-13.9892	-8.6218	-24.3235	34.1246	-15.4862	-14.3615	-1.99438	-18.3	-5.66343	3517.64	2300.68	72.0083	-24.8459	-17.3111	-25.0384	-18.8422	-24.9448	-1.19732	0.3702	6.94443	3.32345	-4.19343	-30.7124	-47.3124	-21.3405	-29.7027	5563.78	394.22	110.211	-48.9186	-58.0492	-20.2777	-37.0641
445	LeC(6',3diSu)	(6S)Galb1-3(6S)GlcNAc-Sp0	-240.134	-35.6078	40.0925	-18.218	-11.6058	-13.5935	-27.8993	-28.0335	-18.6223	-4.49465	-9.47435	-22.4204	1979.56	589.243	2801.26	-17.2076	-5.66952	-16.1797	-8.99985	-12.0562	-2.4416	-10.1994	7.99467	-0.668275	2.7979	-34.3842	-11.9406	-12.0897	-7.0323	5193.05	425.759	35.7395	-12.3287	-24.6132	-10.4126	-24.7907
446	BG-H2 like	Fuca1-2Galb1-4 GlcNAcb1-2Mana1-6(Fuca1-2Galb1-4GlcNAcb1-2(Fuca1-2Galb1-4GlcNAcb1-4)Mana1-3)Manb1-4GlcNAcb1-4GlcNAcb-N	3768.04	1597.49	402.077	15.6104	7.74065	22.2675	10.5524	-10.3326	43.6535	-7.25227	5.11633	27.114	51.2935	-143.706	315.626	8.3529	-6.6821	-9.15875	26.4123	23.018	-2.65707	4.58785	34.7748	23.5461	29.1002	-13.9874	-11.0286	-12.9421	6.3701	2285.16	350.948	44.6027	-17.9654	15.3354	-3.78017	-9.6382
447	LeY like	Fuca1-2Galb1-4(Fuca1-3)GlcNAcb1-2Mana1-6(Fuca1-2Galb1-4(Fuca1-3)GlcNAcb1-4(Fuca1-2Galb1-4(Fuca1-3)GlcNAcb1-2)Mana1-3)Manb1-4GlcNAcb1-4GlcNAcb-N	1189.14	43.0037	67.7754	-2.3582	-2.95053	23.4318	-29.2259	1.7096	25.7799	-6.0967	7.31005	9.75845	34.9809	-129.855	2027.13	1.88603	1.53872	-12.6089	11.1103	13.5426	-1.27698	9.09865	24.6835	45.3588	36.7416	1.85975	35.8524	-10.4527	5.04623	223.719	94.6821	27.7476	-24.4005	-28.8976	-5.00457	11.3411
448	LeX-b1-6GalNAc	Galb1-4(Fuca1-3)GlcNAcb1-6GalNAc-Sp14	498.956	-27.6995	53.9939	0.406925	-2.88948	18.3753	-1.10822	16.1542	25.3912	-1.74072	10.5234	13.7445	72.177	-233.175	466.997	15.643	5.96657	-14.9423	-2.8498	6.28693	14.2323	-0.949375	8.71683	14.5594	14.2075	-25.1729	3.94805	15.4403	-0.2107	16.4279	44.0445	9.85652	-30.4519	20.7877	-2.23715	17.4245
449		Galb1-4GlcNAcb1-2Mana-Sp0	37.4115	-62.9744	-2.42998	-27.0223	-5.85093	-4.6458	-59.0058	-18.9667	-4.37267	-0.958625	-13.9111	13.3481	-106.943	-67.1147	1192.69	-36.2444	-13.3468	-39.8374	-4.94745	0.25615	10.1727	-8.33997	11.4238	11.7349	19.0956	-19.698	-37.7388	-9.87987	-25.597	14.8659	17.8714	21.5403	-39.0338	-48.4541	-16.7668	-17.1066
450	BG-H2 like	Fuca1-2Galb1-4GlcNAcb1-6(Fuca1-2Galb1-4GlcNAcb1-3)GalNAc-Sp14	160.951	-36.0572	54.3224	-14.2953	-15.8189	-2.19955	-39.405	-10.4555	-3.59	-10.5323	-1.804	3.36337	-1.36382	-132.085	651.433	-12.3225	3.40675	-24.4948	8.364	2.3951	11.2199	3.33038	27.3771	14.6383	13.8631	-18.4525	-26.4746	-12.9415	-18.6847	3495.67	412.235	79.5699	-29.9979	-27.538	-10.8338	-21.5891
451	BG-B2--	Gala1-3Fuca1-2Galb1-4GlcNAcb1-6(Gala1-3Fuca1-2Galb1-4GlcNAcb1-3)GalNAc-Sp14	-176.646	-72.1616	34.5454	-17.9658	-14.6782	-1.7125	-52.8035	-16.5109	0.295775	-18.472	1.65827	7.27505	-154.453	-135.762	839.096	-11.0291	-7.99875	-57.5695	-4.01007	-3.21367	10.3708	-5.99963	8.26227	4.66775	8.06568	-29.9329	-32.265	-17.6928	-9.51555	1209.78	156.969	47.9692	-44.3033	-43.6273	-15.1117	-26.7975
452	BG-A2--	GalNAca1-3(Fuca1-2)Galb1-4GlcNAcb1-6(GalNAca1-3(Fuca1-2)Galb1-4GlcNAcb1-3)GalNAc-Sp14	-93.3812	-70.6618	4.7473	-11.6442	-7.70472	-0.1059	-36.6256	-18.0098	5.68825	-18.083	-10.8895	12.8735	-67.1449	-98.8257	397.073	-11.3007	-17.8388	-35.8871	-8.6837	-2.72763	6.81027	16662.6	19880.9	18121.2	3904.23	-42.3231	-34.0381	-13.8036	-19.3848	1658.31	125.985	36.1069	-31.5311	-41.8956	-15.9282	-16.9293
453	GQ1b	Neu5Aca2-8Neu5Aca2-3Galb1-3GalNAcb1-4(Neu5Aca2-8Neu5Aca2-3)Galb1-4Glcb-Sp0	-224.915	-127.763	27.1958	-13.306	-6.4839	-7.61557	-56.2655	-16.1728	-20.1827	-18.7711	-1.7185	-17.8075	-98.8212	-113.071	763.364	-28.3304	-9.61258	-38.0401	28.6258	1.09845	6.34707	-5.60557	15.3918	-4.07943	0.3615	-28.0403	-43.8593	-14.7997	-13.1404	19080.1	6379.46	1487.39	-54.8011	-66.2561	-8.97095	-42.7826
454	GA2 (asialo-GM2)	GalNAcb1-4Galb1-4Glcb-Sp0	-92.5033	-79.3995	165.207	-8.80557	6.35743	0.386975	-29.9085	-17.2232	11.8436	-14.4466	-4.01677	38.1346	-138.781	-67.437	738.614	-12.8299	-6.83907	-18.572	24.02	11.5375	20.3776	-2.4154	7.43675	8.75985	4.34387	-25.2192	-32.1081	0.943225	-20.5311	13.6481	14.9161	17.2456	-34.0223	-48.6796	-9.21605	-0.355125
455	BG-A2--	GalNAca1-3(Fuca1-2)Galb1-4GlcNAcb1-2Mana1-6(GalNAca1-3(Fuca1-2)Galb1-4GlcNAcb1-2Mana1-3)Manb1-4GlcNAcb1-4(Fuca1-6)GlcNAcb-Sp22	21180	658.055	2511.52	50.9211	-5.1296	-2.4608	-59.2688	-9.46315	-2.124	-11.023	2.64263	10.6077	-144.662	-58.221	1210.81	-17.6696	-3.0222	-50.3567	38.8884	28.3211	43.8299	11600.6	13333.6	10095.6	2332.22	-35.4421	-48.0814	-4.9511	-18.4791	16.6815	9.65343	7.81917	-39.0605	-72.469	-5.81835	-33.96
456	BG-B1--	Gala1-3(Fuca1-2)Galb1-3GlcNAcb1-2Mana1-6(Gala1-3(Fuca1-2)Galb1-3GlcNAcb1-2Mana1-3)Manb1-4GlcNAcb1-4(Fuca1-6)GlcNAcb-Sp22	31035.9	19257.7	4578.43	211.436	126.754	-5.69362	-69.7305	-15.8591	-13.9677	-9.0895	-7.67463	5.96335	-185.08	867.157	380.639	-6.57515	-16.751	-22.77	76.8398	36.9442	59.9513	-3.48105	11.6883	11.5287	14.6939	-24.5965	-13.0048	-10.1875	-10.9542	22.5604	28.1828	19.8041	-37.9195	-53.3057	-12.8419	-17.9296
457	MSMFLNH I	Neu5Aca2-6Galb1-4GlcNAcb1-6(Fuca1-2Galb1-3GlcNAcb1-3)Galb1-4Glc-Sp21	-51.1942	-14.443	29.1408	1.226	-4.12843	-3.26992	-16.6814	-26.5551	0.79135	-7.01097	-20.2134	4.33843	36615.7	39604.2	20297.3	2633.83	2370.28	839.637	-8.22467	-4.18925	-2.86933	-2.6471	8.40135	12.63	9.83475	-29.355	-31.1346	-13.6149	-15.8574	24167.9	4452.83	691.54	-29.4173	-20.0801	-4.71863	-7.06295
458	BG-A1--	GalNAca1-3(Fuca1-2)Galb1-3GlcNAcb1-2Mana1-6(GalNAca1-3(Fuca1-2)Galb1-3GlcNAcb1-2Mana1-3)Manb1-4GlcNAcb1-4(Fuca1-6)GlcNAcb-Sp22	21192	16618.1	2416.38	143.278	133.581	-1.47182	-15.8625	-16.5585	4.5291	6.98752	6.81925	12.5062	-96.9975	899.619	20.4375	15.8651	-6.27357	-9.6482	20.6441	3.58625	-22.9075	11140.2	12498	8925.34	1074.88	-34.4348	-17.5388	2.09625	-21.1351	15.9664	13.9588	6.48253	-37.6186	-27.8922	-17.587	-24.6817
459	NA3 related	Galb1-4GlcNAcb1-6(Galb1-4GlcNAcb1-2)Mana1-6(Galb1-4GlcNAcb1-2Mana1-3)Manb1-4GlcNAcb1-4GlcNAcb-Sp19	20872.6	16499.5	2346.6	54.2389	14.0539	-10.2869	-39.8026	-19.4059	-5.87103	-8.387	-10.1884	5.69958	39.3523	-71.5528	56.9228	-8.06385	2.72	-23.2405	5.71685	3.41292	5.72967	-3.39875	7.67948	-1.22042	7.32275	-27.0303	-30.2682	-24.6857	-23.1235	40236.5	27209.5	6139.72	-45.2591	-50.51	-12.5923	-30.6324
460	A2B	Neu5Aca2-3Galb1-4GlcNAcb1-2Mana1-6(GlcNAcb1-4)(Neu5Aca2-3Galb1-4GlcNAcb1-2Mana1-3)Manb1-4GlcNAcb1-4GlcNAcb-Sp21	5366.47	1553.18	143.148	-3.57948	-4.53617	-1.35127	167.879	-18.1489	-8.00497	-6.26635	-18.9458	3.8107	-293.883	-53.9857	-2.03325	-5.2378	4.58845	-23.9171	3089.8	198.495	-13.6348	-7.6658	14.7565	2.70458	-2.82083	-35.3324	-40.7569	-23.8551	-29.7914	21.3857	5.18978	2.47955	-54.1737	-45.8611	-16.4688	-33.3887
461	A3B	Neu5Aca2-3Galb1-4GlcNAcb1-4Mana1-6(GlcNAcb1-4)(Neu5Aca2-3Galb1-4GlcNAcb1-4(Neu5Aca2-3Galb1-4GlcNAcb1-2)Mana1-3)Manb1-4GlcNAcb1-4GlcNAcb-Sp21	15.1277	-28.1091	18.8538	18.6848	-7.1272	-4.98755	-22.5646	-24.9196	-4.68023	-14.1104	-21.1792	8.09715	-71.2687	-57.5578	114.674	-12.6947	22.9511	-18.8361	9489.94	1710.37	39.5382	-5.83277	-1.20343	5.08233	-4.0165	-36.199	-24.3748	-10.841	-17.5246	22.7105	1.36795	-0.635275	-40.2181	-48.9179	8.74222	-33.2228
462	A3B	Neu5Aca2-3Galb1-4GlcNAcb1-6(Neu5Aca2-3Galb1-4GlcNAcb1-2)Mana1-6(GlcNAcb1-4)(Neu5Aca2-3Galb1-4GlcNAcb1-2Mana1-3)Manb1-4GlcNAcb1-4GlcNAcb-Sp21	-40.6527	-33.4216	-11.3042	3.08365	-13.5379	-3.7872	-37.4109	-34.8456	1.83183	-7.74317	-24.2465	-3.59267	-74.0419	-30.0378	22.866	-9.8568	-13.6179	-24.2618	2836.77	187.457	0.653625	-4.0499	8.56548	2.01068	-0.18965	-38.4079	-40.359	-16.4824	-27.3878	17.5924	9.88267	-2.79573	-61.2547	-23.3595	-26.0307	-0.009025
463	A4B	Neu5Aca2-3Galb1-4GlcNAcb1-6(Neu5Aca2-3Galb1-4GlcNAcb1-2)Mana1-6(GlcNAcb1-4)(Neu5Aca2-3Galb1-4GlcNAcb1-4(Neu5Aca2-3Galb1-4GlcNAcb1-2)Mana1-3)Manb1-4GlcNAcb1-4GlcNAcb-Sp21	-129.351	37.2611	-3.98372	-2.39073	-13.9583	-2.1891	-22.0401	-8.85417	-1.99005	-13.4854	-8.19285	-12.1882	-77.5959	-115.021	43.419	-6.50028	-15.2327	-17.6321	6476.12	1086.23	87.4929	-5.37692	5.82932	1.37625	9.37272	-12.7347	-30.0003	-22.7289	-23.3006	15.2114	1.27355	11.159	-35.3244	-44.1981	-7.6702	-38.9629
464	A2B	Neu5Aca2-6Galb1-4GlcNAcb1-2Mana1-6(GlcNAcb1-4)(Neu5Aca2-6Galb1-4GlcNAcb1-2Mana1-3)Manb1-4GlcNAcb1-4GlcNAcb-Sp21	564.624	-19.6267	43.929	-8.0157	-5.33462	9.6995	-54.7941	77.9259	-12.5342	-6.89583	-13.6896	3.38915	41871.4	39685	38066	13302.8	9257.24	3858.95	26.6647	5.32962	62.879	-0.936675	3.71162	-0.62565	2.17133	-45.4516	-65.0784	-24.2665	-17.9327	10184.4	658.399	209.949	-54.9087	-65.2822	-17.4161	-44.0142
465	A3B	Neu5Aca2-6Galb1-4GlcNAcb1-4Mana1-6(GlcNAcb1-4)(Neu5Aca2-6Galb1-4GlcNAcb1-4(Neu5Aca2-6Galb1-4GlcNAcb1-2)Mana1-3)Manb1-4GlcNAcb1-4GlcNAcb-Sp21	-124.802	27.1656	20.3334	-2.92582	-9.4503	1.62982	-48.4274	-9.69577	-1.96515	-21.8891	-16.8435	3.3958	43978	45039.4	37015.4	21007.2	16460.1	6061.23	13.9782	14.4986	45.6148	-9.26597	11.7448	1.59598	-2.01168	-27.4316	-39.5447	-11.7126	-12.006	18686.4	1302.16	248.194	-45.66	-54.0268	-3.64145	-42.838
466	A3B	Neu5Aca2-6Galb1-4GlcNAcb1-6(Neu5Aca2-6Galb1-4GlcNAcb1-2)Mana1-6(GlcNAcb1-4)(Neu5Aca2-6Galb1-4GlcNAcb1-2Mana1-3)Manb1-4GlcNAcb1-4GlcNAcb-Sp21	-12.3907	-87.9565	-21.7941	-6.54612	-2.8718	3.8226	-39.1419	4.54477	0.115725	-6.4065	-4.84667	-6.81283	41797.7	37903.8	33313.7	14003.1	11269.9	3391.93	51.8214	14.2588	88.3711	-1.57808	8.73767	8.95135	6.4843	-80.1828	-49.4963	-18.2307	-15.737	8636.08	501.241	147.986	-67.7856	-79.4361	-22.8962	-36.5283
467	A4B	Neu5Aca2-6Galb1-4GlcNAcb1-6(Neu5Aca2-6Galb1-4GlcNAcb1-2)Mana1-6(GlcNAcb1-4)(Neu5Aca2-6Galb1-4GlcNAcb1-4(Neu5Aca2-6Galb1-4GlcNAcb1-2)Mana1-3)Manb1-4GlcNAcb1-4GlcNAcb-Sp21	-76.9577	-1.17933	61.65	-3.09362	-4.12043	-1.28473	-43.3593	20.0789	20.4407	-10.6905	-17.4148	4.56788	48246.5	38314.4	39630.6	23551.2	16971.2	5946.68	96.0855	26.1079	66.5261	-6.56545	1.37855	-1.88915	0.5405	-39.4193	-37.2696	-5.0809	-24.5996	25029.2	2621.15	423.968	-29.5832	-43.1191	-16.8786	-11.5208
468	BG-B3	Gala1-3(Fuca1-2)Galb1-3GalNAca-Sp8	-11.9661	-83.1932	-1.23042	-2.75225	3.6351	-12.2583	-6.13932	-7.07317	-4.2989	2.70595	1.16847	-3.59697	-121.94	-2.06387	250.594	-14.574	-14.7074	-29.1778	101.56	-4.70705	141.913	-2.50395	-0.886475	-1.3463	-1.59363	-50.6127	-50.63	-15.475	-38.0311	5.45932	0.393075	2.99805	-88.732	-87.2091	1.06352	-35.7207
469	BG-B4	Gala1-3(Fuca1-2)Galb1-3GalNAcb-Sp8	-109.961	-82.2305	6.18625	-0.207675	-4.81645	1.41498	-55.3737	22.3078	3.53108	-4.92357	0.6753	0.2174	279.287	-48.0196	457.357	1.88398	-3.0176	-12.641	10.1354	17.9209	59.7453	1.92325	6.02365	3.91705	8.27078	-31.7381	-11.1817	-5.35333	-11.0696	9.39135	5.06885	5.39125	-24.0473	-46.9129	3.83463	-8.38125
470		Glca1-6Glca1-6Glca1-6Glcb-Sp10	-107.846	-21.014	76.7057	-2.1803	13.45	8.73608	-24.3632	-7.69867	17.7515	-3.95913	3.10913	4.32445	-174.29	-34.2648	718.048	9.22367	-5.39888	-6.1072	57.0005	15.7252	100.671	-1.86603	8.85278	15.2569	3.92055	-31.812	0.59795	4.64007	-6.06963	18.2522	19.2611	14.1271	-20.1788	-28.7336	-5.97487	3.30045
471	maltotetraose	Glca1-4Glca1-4Glca1-4Glcb-Sp10	-151.306	-62.1139	83.0392	-6.86588	11.8375	0.01505	-31.111	-16.0186	7.7026	-5.87547	10.1085	17.3779	-143.572	-72.2118	592.19	3.62938	-7.11075	-23.8433	10.5444	2.41738	2.42185	0.117725	11.1376	10.1862	7.18583	-26.0863	-12.5022	-1.72855	-14.4553	5.49745	10.1824	18.4012	-38.872	-13.3401	-18.6195	-4.8497
472	3'SLacNAc--	Neu5Aca2-3Galb1-4GlcNAcb1-6(Neu5Aca2-3Galb1-4GlcNAcb1-3)GalNAca-Sp14	-67.9736	-64.6115	-1.24645	-4.99993	-6.46457	-7.42835	-0.78065	-26.4476	-9.59835	-11.1853	5.62088	-1.74082	-105.971	39.5319	170.991	3.776	-11.6358	-12.0562	12700.8	2458.04	262.61	-0.96485	5.6488	4.76765	2.51802	-31.3378	-24.5318	9.41482	-11.7181	1.26763	11.4956	13.6466	-42.3753	-33.3412	0.54205	-0.910225
473	LeY like	Fuca1-2Galb1-4(Fuca1-3)GlcNAcb1-2Mana1-6(Fuca1-2Galb1-4(Fuca1-3)GlcNAcb1-2Mana1-3)Manb1-4GlcNAcb1-4(Fuca1-6)GlcNAcb-Sp24	1236.49	376.38	525.993	7.0387	27.8767	21.2278	-2.95735	-14.5164	38.0848	-5.8792	3.01073	11.3791	74.3399	-96.5256	2520.77	13.7549	19.6088	-8.23227	7.34843	1.19878	6.64485	2.65875	17.3348	24.5363	19.9226	-19.3985	-14.2287	-8.25948	-8.32042	2815	692.737	141.089	-13.3246	-21.9562	-4.80403	3.29035
474	LeB--	Fuca1-2Galb1-3(Fuca1-4)GlcNAcb1-2Mana1-6(Fuca1-2Galb1-3(Fuca1-4)GlcNAcb1-2Mana1-3)Manb1-4GlcNAcb1-4(Fuca1-6)GlcNAcb-Sp11-4(Fuca1-6)GlcNAcb-Sp19	8362.76	2698.71	622.907	5.25297	5.91307	14.6356	-9.02638	9.41767	12.5568	-3.70095	-6.37708	18.5419	53.8254	-218.936	182.74	-4.52733	1.08937	-12.5706	16.1185	-1.2717	15.5986	5.25293	8.60942	13.1879	1.41783	-22.7294	-1.78523	-14.0498	8.62817	24.606	17.1922	21.426	-11.59	-6.87927	-10.313	-5.29347
475	3'SLeC--	Neu5Aca2-3Galb1-3GlcNAcb1-6(Neu5Aca2-3Galb1-4GlcNAcb1-2)Mana1-6(Neu5Aca2-3Galb1-3GlcNAcb1-2Mana1-3)Manb1-4GlcNAcb1-4GlcNAcb-Sp19	4850.87	665.765	655.81	6.54668	-2.03647	-5.33835	-13.6688	-13.0648	-3.17675	-0.779025	-4.57655	16.6545	219.253	-138.558	3059.83	39.7108	-10.0064	-17.2803	-5.7533	-7.6807	24.6768	2.36887	25.6713	20.0364	12.0655	-23.6362	-27.3971	-22.9797	-23.7351	12.9156	20.0423	2.096	-23.5215	-33.2673	-5.65643	-14.084
476	NGA3F	GlcNAcb1-6(GlcNAcb1-2)Mana1-6(GlcNAcb1-2Mana1-3)Manb1-4GlcNAcb1-4(Fuca1-6)GlcNAcb-Sp24	9277.21	3559.51	520.561	16.3976	1.04208	4.36163	-20.3806	-6.25198	13.4704	-3.23368	1.78952	15.4774	-80.4563	-45.7575	132.131	3.12362	-2.08975	-21.3898	-9.81755	16.1578	5.15677	-2.7105	17.3608	5.06365	1.42752	-17.5769	-20.0711	-11.6478	-14.3312	10.3922	7.00415	17.2933	-28.8534	-24.8994	-8.9671	-5.53073
477	LeC like	Galb1-3GlcNAcb1-2Mana1-6(GlcNAcb1-4)(Galb1-3GlcNAcb1-2Mana1-3)Manb1-4GlcNAcb1-4GlcNAcb-Sp21	35401.4	18607.2	3554.19	7.546	43.9465	2.074	1571.32	109.607	33.7589	6.59662	-11.8654	2.23885	62.7993	-189.869	2899.64	-11.9101	-4.46362	-21.2532	-16.0829	3.91457	8.07917	-5.91935	13.6432	1.23395	7.32342	-9.33913	-14.9112	-12.8237	-13.1225	8117.73	548.975	148.831	-20.4398	-30.631	-11.4885	-33.6592
478	6'SLacNAc/LeC	Neu5Aca2-6Galb1-4GlcNAcb1-6(Galb1-3GlcNAcb1-3)Galb1-4Glcb-Sp21	-13.5122	-24.9209	-0.029275	-13.3567	0.18285	-1.96287	-25.2632	-12.259	-14.2842	-6.96828	-16.7719	11.3138	34836.8	40002.9	30297.4	6006.01	3124.42	2328.79	-3.05583	-1.87765	19.1826	-14.0445	2.9977	8.03133	-0.022275	-22.632	-17.6845	-14.7875	-24.7535	27793.4	5923.85	687.058	-29.8418	-19.8619	-10.5882	-10.745
479	3'SLacNAc --	Neu5Aca2-3Galb1-4GlcNAcb1-2Mana-Sp0	-135.735	-86.2041	615.859	-7.4862	-10.0052	18.825	-45.2975	17.0599	43.478	-17.5209	-0.941775	23.8684	720.373	-161.479	6154.47	-7.89318	-19.1044	-34.051	-8.81795	21.2991	6.53843	21.4375	45.4549	38.6926	16.4192	-33.4988	-6.85802	-9.52485	-21.1465	21.9087	27.1727	29.6036	-26.0943	-65.2874	-16.8118	-35.0761
480	3'SLacNAc--	Neu5Aca2-3Galb1-4GlcNAcb1-6GalNAca-Sp14	-142.826	-64.4822	-3.55898	-1.24548	-9.64947	-5.1832	-32.7723	-22.1491	42.6082	-16.7377	-14.504	-9.37555	-132.821	-50.8694	859.341	-7.2306	-13.5001	-18.8407	3023.06	315.142	18.593	-11.3211	11.1977	-5.07177	0.951275	-14.4689	-22.9199	-14.0781	-22.9432	3.01982	11.1595	13.6132	-35.2292	-46.2068	-17.2227	-9.55777
481	3'SLacNAc --	Neu5Aca2-6Galb1-4GlcNAcb1-6GalNAca-Sp14	-58.242	-19.4106	109.412	1.22668	-1.67188	15.0403	-52.0537	7.16698	22.9331	-8.81487	-3.54678	22.0927	-0.199	283.881	685.793	6.60403	4.44092	-22.8422	88.0088	31.2536	77.8122	0.23295	16.1493	5.169	6.52915	-32.6164	-8.50275	-18.9775	-6.02238	1.69913	13.1975	21.5431	-32.0332	-34.1669	0.167775	-11.6511
482	6'SLacNAc --	Neu5Aca2-6Galb1-4 GlcNAcb1-6(Neu5Aca2-6Galb1-4GlcNAcb1-3)GalNAca-Sp14	220.946	-67.6318	55.9829	0.190025	1.6918	-1.83405	-42.8053	1.14765	10.974	0.0078	-2.96795	13.6607	30283.4	25170.9	53295.7	11955.9	9031.35	4019.33	48.6228	-14.181	35.4486	-4.09003	20.657	1.1999	4.5406	-40.5165	-42.1461	-16.0697	-17.9333	806.678	71.1897	14.6416	-44.9919	-102.145	-7.38863	-43.3848
483	A2F	Neu5Aca2-6Galb1-4GlcNAcb1-2Mana1-6(Neu5Aca2-6Galb1-4GlcNAcb1-2Mana1-3)Manb1-4GlcNAcb1-4(Fuca1-6)GlcNAcb-Sp24	41391.7	32857.6	2110.82	46.6299	11.3195	6.24395	-9.49958	0.38735	20.5066	7.0956	-12.3932	5.18615	41105.6	24391.3	37450	19594.8	11413.8	4075.95	206.457	21.7477	72.517	-0.801925	8.5493	22.2405	13.4295	-18.432	-11.7322	-9.41632	-2.61585	1020.83	120.185	21.4821	-23.3673	-24.0071	-5.78235	0.4043
484	A2F	Neu5Aca2-3Galb1-4GlcNAcb1-2Mana1-6(Neu5Aca2-3Galb1-4GlcNAcb1-2Mana1-3)Manb1-4GlcNAcb1-4(Fuca1-6)GlcNAcb-Sp24	34862.5	22065.7	1690.34	16.3073	-8.68068	-3.27647	-14.3225	-23.4975	-2.05155	-4.7242	-7.2296	-4.79915	-57.9074	-24.6453	26.2528	-5.14227	-14.2748	-15.7239	13138.2	3513.73	325.086	-3.88155	8.34323	3.55105	3.57542	-38.3171	-18.5483	-30.9419	-17.6355	4.03373	12.7129	7.84895	-25.1677	-18.8544	-13.2931	-13.2612
485	Man3F	Mana1-6(Mana1-3)Manb1-4GlcNAcb1-4(Fuca1-6)GlcNAcb-Sp19	38453	36236.5	15250.7	1585.07	1990.11	265.516	-30.1498	-16.4004	6.58835	-6.23258	-10.9822	8.5055	2041.4	10968.2	183.496	0.732875	5.404	-12.6622	1.85157	-3.09047	-27.903	-3.4026	6.57245	2.90317	1.95225	-58.3233	-22.7399	-4.22948	-10.3382	-1.25588	3.04985	-0.463275	-10.0953	-42.4763	-17.7054	-30.0457
486	NA3F	Galb1-4GlcNAcb1-6(Galb1-4GlcNAcb1-2)Mana1-6(Galb1-4GlcNAcb1-2Mana1-3)Manb1-4GlcNAcb1-4(Fuca1-6)GlcNAcb-Sp24	4628.39	1383.65	111.588	-5.54837	-6.56025	0.927075	-31.3603	-12.3894	-0.682575	-3.56895	-12.2595	1.81072	265.248	-126.278	98.4267	7.35635	-5.24898	-14.3567	19.7525	4.6825	10.0264	-0.2996	11.0034	8.11902	10.6839	-25.0284	-22.1285	-8.85628	-17.7087	42287.5	38310.7	7248.05	-32.9771	-27.5041	-11.0564	-22.6986
487	3'SLeC--	Neu5Aca2-3Galb1-3GlcNAcb1-2Mana1-6(GlcNAcb1-4)(Neu5Aca2-3Galb1-3GlcNAcb1-2Mana1-3)Manb1-4GlcNAcb1-4GlcNAc-Sp21	1803.82	1139.55	53.9797	1.85862	5.00137	12.9691	-37.3747	-10.7799	24.2772	-5.73573	-14.8731	12.0504	-212.366	-128.701	209.211	-8.5483	-0.0662	-17.0192	16.9173	29.3196	24.4981	-5.026	6.37738	11.8932	3.9862	-41.7925	-44.276	-23.3088	-24.6561	1.9833	6.14305	17.1056	-42.3961	-41.9651	-11.7058	-19.9032
488	6'SLacNAc/LeY	Neu5Aca2-6Galb1-4GlcNAcb1-6(Fuca1-2Galb1-4(Fuca1-3)GlcNAcb1-3)Galb1-4Glc-Sp21	-81.1109	-41.6488	-1.4506	-4.36585	-10.0571	-1.98995	-37.1125	-16.1339	-2.71047	-1.51285	-22.0639	-7.98688	41674.5	40809.2	21783.5	4662.37	3541.9	1176.59	1.98277	12.3608	13.1918	-7.4605	6.90822	-3.4371	8.59385	-30.6774	-27.7627	-21.2157	-27.9271	15265.4	2391.67	434.506	-34.8862	-54.8357	-21.8065	-19.4822
489	LeC like	Galb1-3GlcNAcb1-6GalNAca-Sp14	-33.621	-30.6358	-5.98142	-0.022125	-4.0771	-6.4686	-23.7665	-24.7918	-4.5306	-4.222	-9.54678	10.3745	-228.414	-58.2627	-19.4764	-7.0288	-11.2159	-25.9556	5.00382	12.098	15.5249	-9.4624	8.81215	8.02143	11.2497	-78.9523	-23.7083	-35.8602	-21.5922	11.626	17.7957	8.09547	-22.7118	-8.27447	-15.1609	-4.89425
490	alpha Gal like	Gala1-3Galb1-3GlcNAcb1-6GalNAca-Sp14	-70.7864	8.04833	17.732	6.9591	-5.67512	-10.6434	-28.7417	-28.2623	-15.5701	-21.2277	-7.00985	-9.91788	110.407	-130.096	399.333	-3.63365	-13.5733	-12.9369	11.3535	5.39455	18.4583	-8.80975	1.93085	1.1109	4.70167	-49.2262	-40.6775	-8.57252	-29.6877	28.9393	60.9116	17.1369	-63.8751	-59.4138	-27.6478	-29.3469
491	LeA--	Galb1-3(Fuca1-4)GlcNAcb1-6GalNAca-Sp14	238.466	-103.434	44.095	-5.30655	-3.49405	18.6918	-38.3104	-12.7686	31.918	6.02308	0.204675	18.1138	-449.55	905.627	307.198	3.47487	2.4241	-24.7146	184.447	117.262	317.089	-3.26872	2.6542	11.512	2.5559	-70.6779	-41.8655	-57.0857	-27.5032	26.0044	15.9912	16.9741	-72.1381	-100.038	-10.2219	5.89695
492	3'SLeC--	Neu5Aca2-3Galb1-3GlcNAcb1-6GalNAca-Sp14	-85.7988	-27.3839	-3.911	-8.54805	-9.88737	-5.5012	-63.1989	-26.1733	-11.8069	-0.100525	-6.39585	4.88862	94.4758	-96.2508	502.53	14.7496	-9.4943	-11.2397	5.68118	-5.19152	62.6423	-3.41077	3.63922	12.3003	0.9924	-38.6432	-13.3031	-13.5261	-10.8402	2.32658	7.7556	5.376	-36.7995	-55.1219	-8.22312	-15.6281
493	3'Su-LeA	(3S)Galb1-3(Fuca1-4)GlcNAcb-Sp0	-133.384	-45.103	22.7925	-4.5436	-0.80375	0.784275	-12.7611	11.7438	30.4778	-10.5084	9.47828	16.9144	-88.4667	12.4579	391.047	0.245475	-9.23415	-4.34983	39.165	7.56442	22.206	0.353975	10.3433	11.8314	10.5596	-18.9889	-4.52452	5.72065	-5.2979	13.3696	14.1769	7.13205	0.901075	-1.43772	-4.1832	-7.20467
494	LeX/	Galb1-4(Fuca1-3)GlcNAcb1-6(Neu5Aca2-6(Neu5Aca2-3Galb1-3)GlcNAcb1-3)Galb1-4Glc-Sp21	228.873	-45.6731	3.852	3.16878	-4.60997	-2.98123	-38.8484	-3.7796	21.7921	8.29082	0.742425	12.2676	1771.54	403.11	124.347	16.6064	-10.065	-11.8389	-2.10735	-5.21635	10.3896	-8.82498	11.7673	14.6731	14.8349	-11.4252	-41.0747	-3.93187	-19.1832	76.8901	9.45035	9.25525	-24.3743	-16.5628	-13.0448	-13.3727
495	BG-H2 like	Fuca1-2Galb1-4GlcNAcb1-6GalNAca-Sp14	992.38	548.914	273.264	13.1747	3.19832	8.94955	-10.1062	18.8634	3.73315	-6.0651	10.6765	16.6436	37.5924	556.153	529.876	35.8706	-1.4812	-7.62525	37.847	4.78858	14.461	16.3035	20.7357	28.9035	15.3566	-5.52	-6.7402	-3.84685	3.80455	65.5833	36.9424	8.09857	-41.7379	-1.9408	4.6143	-10.2019
496	alpha Gal like	Gala1-3Galb1-4GlcNAcb1-6GalNAca-Sp14	781.923	-29.5528	25.2872	-6.86468	-7.77783	-8.90995	-18.7138	-25.6268	-10.5625	-4.1133	-11.8866	7.6462	-54.6181	-190.267	1382.3	-8.08313	-10.1553	-17.3843	-5.95237	1.45825	-2.37575	-11.5758	5.77285	0.1597	0.5361	-8.59297	-17.9683	-7.67885	-5.35683	212.058	102.234	21.2565	-19.9114	-28.9947	-16.6518	-29.3029
497	LeX-b1-2Man	Galb1-4(Fuca1-3)GlcNAcb1-2Mana-Sp0	23.9817	-15.9173	51.8415	-10.904	2.1368	1.84127	-11.0721	-1.0612	12.9184	-5.24265	-4.54475	12.1394	-88.0717	-157.517	96.9	-10.5245	-2.7267	-15.1899	-7.64625	3.79842	-4.8904	-8.47453	4.9183	3.57602	14.7003	-13.9561	-13.7899	-11.8454	-10.194	1.94777	25.93	12.9724	-28.2201	-16.9377	-18.8436	-28.9211
498	6'Su-BG-H1	Fuca1-2(6S)Galb1-3GlcNAcb-Sp0	-87.1271	-43.4965	9.63125	-18.3326	-26.7674	-10.0328	-41.1752	-23.344	-19.4932	-13.8851	0.19525	-0.157125	968.325	-184.227	5680.9	-24.8112	-19.2759	-23.1131	-10.5811	-15.2886	-1.93223	-13.8426	14.0641	-2.0498	2.49668	-26.5958	-37.9234	-25.1684	-24.0985	41.1026	7.67162	15.2985	-5.29805	-42.3705	-32.1098	-24.4494
499	BG-B2 like	Gala1-3(Fuca1-2)Galb1-4GlcNAcb1-6GalNAca-Sp14	77.4585	12.9438	64.7678	-2.5345	-10.6668	-8.14105	-3.66632	-6.20567	-2.5762	-8.88905	7.1807	11.3205	-64.9483	-119.815	476.428	-8.95493	-11.63	-21.3882	6.51335	5.82943	7.47952	-6.9068	11.2573	0.7563	1.88948	2.8427	-18.8301	-17.7036	-8.67207	11.8222	6.47528	12.1683	-33.4506	-36.5802	-9.39043	-14.3512
500	BG-H2--	Fuca1-2Galb1-4GlcNAcb1-2Mana-Sp0	-169.126	-93.4971	37.1056	-29.3399	-23.2314	-8.36732	-65.2307	-23.3261	-23.707	2.12895	-8.79533	0.7395	-99.135	-251.017	2110.22	-17.9938	-10.6015	-20.8939	-2.76695	2.30947	-2.80473	-10.7975	3.93615	3.4548	3.0525	-20.3599	-24.197	-8.2467	-8.88498	13.3996	19.4291	9.36325	-25.5564	-44.6907	-25.7095	-31.4465
501	BG-H like	Fuca1-2Galb1-3(6S)GlcNAcb-Sp0	140.295	106.044	74.3271	-26.0084	-8.2102	7.4312	-39.4772	-25.6582	6.27355	-3.57467	-1.12567	7.76073	-97.815	-130.834	391.776	-20.1337	-8.90042	-17.8113	-11.0315	-0.144825	17.8696	28.178	45.3817	11.0761	11.5815	-7.90085	-26.2421	-22.9424	-24.7781	3.80987	0.715525	18.6823	-29.5109	-33.4495	-15.9682	-15.0688
502	BG-H like	Fuca1-2(6S)Galb1-3(6S)GlcNAcb-Sp0	69.4762	1.26303	145.979	-25.5782	-14.015	-16.7897	-54.5783	-20.0943	-21.2933	-20.2417	-14.5878	-23.6335	1820.66	912.978	1608.84	-7.61805	-19.3502	-39.1184	-7.8796	-0.484425	4.98788	61.1291	43.457	36.5841	35.4145	-31.7096	-35.9242	-13.3942	-9.39245	33.5695	42.6652	22.5845	-31.6045	-62.9154	-21.4746	-26.0282
503	6'S-6Su-LDN	Neu5Aca2-6GalNAcb1-4(6S)GlcNAcb-Sp8	-162.188	-64.499	1.44807	-15.3952	-11.3787	-6.44235	1.04945	-28.2697	-9.93963	-7.66585	-16.0316	21.6776	41617.8	39592.5	30292	6624.22	5082.71	2831.12	568.041	76.8061	1.0951	-9.2225	10.1435	1.19725	3.72475	-38.255	-32.1587	-18.5316	-11.9538	15.2246	6.4487	1.25203	-24.7401	-50.8174	-15.2532	-25.3193
504		GalNAcb1-4(Fuca1-3)(6S)GlcNAcb-Sp8	-67.7925	-43.3602	-3.32257	-0.33045	-5.4151	-0.66445	-34.9226	3.82405	0.319075	-17.3235	-14.6436	-6.2342	-174.925	45.5913	385.773	-6.60855	-6.8359	-23.0033	5.77273	-1.07435	7.72635	-4.77475	4.86902	-2.22807	-0.6254	-22.5918	-41.4422	-5.90552	-24.3734	12.983	3.81297	7.17775	-25.4842	-42.6968	-12.8416	-11.1023
505		(3S)GalNAcb1-4(Fuca1-3)GlcNAcb-Sp8	155.112	-129.468	82.6921	-7.52372	-5.05033	-9.38993	-49.5107	7.04483	-3.86163	-5.79705	-11.2234	-3.94833	-123.418	295.92	177.079	-2.50623	-12.9148	-26.5779	4.6617	-25.8208	8.4012	-1.64253	6.07605	-1.07065	0.84875	-48.321	-64.8613	-15.569	-33.1401	-2.19145	7.07515	2.47947	-68.9174	-97.8777	-19.2057	-58.7971
506	BG-H1 like	Fuca1-2Galb1-3GlcNAcb1-6(Fuca1-2Galb1-3GlcNAcb1-3)GalNAca-Sp14	1105.37	658.007	193.894	18.1244	3.84475	22.6453	-15.1873	11.5882	20.028	-3.7553	-5.60977	0.143375	26.2256	387.902	184.625	14.9223	5.23228	-18.781	192.493	2.8233	31.2416	-3.71043	10.1437	12.1685	5.7682	-20.5566	0.985	-0.37675	-12.2569	83.0582	51.014	15.1436	-32.0605	-59.0199	-9.59125	15.5359
507	BG-A1 like	GalNAca1-3(Fuca1-2)Galb1-3GlcNAcb1-6GalNAca-Sp14	-33.9076	-41.634	-19.8373	-10.4976	-8.88517	-10.5947	-12.6566	-25.7724	-9.89355	-0.035225	-11.4608	-0.953275	-71.3012	-49.3491	36.0446	-5.2113	-9.35338	-5.10503	-16.4708	-1.21345	-11.8764	16247.6	16024.8	10746.5	2073.21	-39.2967	-20.3343	-14.1604	-14.1536	-2.70083	3.32985	8.78235	-27.7917	-19.5145	-12.0416	-4.36167
508	NGA4BF	GlcNAcb1-6(GlcNAcb1-2)Mana1-6(GlcNAcb1-4)(GlcNAcb1-4(GlcNAcb1-2)Mana1-3)Manb1-4GlcNAcb1-4(Fuca1-6)GlcNAc-Sp21	6.52722	-38.38	-8.52093	-3.45388	-5.76192	-10.4079	-28.1724	-20.8088	-2.4875	0.718625	-10.7469	-1.38135	-149.116	-338.278	40.5019	-12.7315	-3.99452	-9.06088	-4.08012	-10.9707	-32.483	1084.95	30.1804	4.47555	-2.63103	-35.9867	-15.321	-19.0139	-13.1769	-1.9648	-3.55965	4.21697	-29.9419	-53.691	-16.4371	-9.57587
509	NA4BF	Galb1-4GlcNAcb1-6(Galb1-4GlcNAcb1-2)Mana1-6(GlcNAcb1-4)Galb1-4GlcNAcb1-4(Gal b1-4GlcNAcb1-2)Mana1-3)Manb1-4GlcNAcb1-4(Fuca1-6)GlcNAc-Sp21	155.06	-34.307	17.8752	-2.78833	6.03748	0.528075	-20.9921	-28.2263	-3.88198	6.5524	-16.6301	-1.27905	111.286	-80.9473	-1.46785	-6.9676	-12.4261	-20.434	-3.16095	8.5891	15.5674	-7.82882	4.56663	2.68367	6.58242	-23.093	-19.6328	-3.5888	-16.2941	42533.6	41241.2	7666.02	-5.38293	-43.5579	-12.7193	-13.6482
510	LeC like	Galb1-3GlcNAca1-3Galb1-4GlcNAcb-Sp8	-96.0379	-42.0565	12.1388	-1.95635	-3.28178	-11.478	110.295	15.9118	-3.75743	-11.8326	-24.5957	-3.11325	-322.995	-136.986	991.725	-25.7898	-0.4129	-24.637	9.06965	1.19768	4.98475	-6.2674	3.47133	4.69185	4.26883	-48.7254	-35.4695	-38.1172	-26.3868	2168.05	345.592	79.4621	-64.1774	-65.6463	-22.4126	-28.8018
511	6Su-LacNAc	Galb1-3(6S)GlcNAcb-Sp8	0.305125	-30.4365	72.2667	-1.4416	-7.60032	-6.04673	-6.99275	-25.2684	-18.1894	6.19313	-18.2322	-17.0834	56.6758	-67.2985	36.5208	-14.8537	-15.8361	-12.3247	14.7038	1.72438	-1.66272	-9.5383	1.6213	10.695	-3.23375	-13.4839	-39.3551	-20.6745	-37.9348	27.2767	42.7444	-0.28795	-16.2551	-37.715	-7.97877	-18.0238
512	4',6'-Di-Su-LDN	(6S)(4S)GalNAcb1-4GlcNAc-Sp8	-83.7257	-18.4403	-5.23158	-0.675325	-8.37845	-22.8959	18.3683	2.81867	-10.7773	-6.4441	-15.935	-7.98893	-273.05	-310.419	250.501	-10.747	-19.6896	-20.2056	-2.1812	9.31102	-10.179	-9.2882	-2.32613	4.6102	2.06497	-21.722	-39.2867	-69.855	-48.6039	4.43387	-1.43173	-0.34185	-24.2351	-7.43005	-20.0434	-10.3861
513	6'Su-LDN	(6S)GalNAcb1-4GlcNAc-Sp8	-109.684	-81.794	56.838	3.70408	-7.8768	-13.1373	29593.1	17072.4	3229.36	-3.17985	-9.66088	-18.5902	44521.7	38799.7	1182.12	-6.9545	-12.0375	-15.2934	230.637	5.8157	-9.70948	-10.823	1.08312	-2.03022	-3.65385	788.098	-45.5614	5.54077	-27.4441	11200.3	1843.24	294.034	-42.7299	-37.704	-26.5131	-26.7635
514	3,3'-Di-Su-LDN	(3S)GalNAcb1-4(3S)GlcNAc-Sp8	-167.598	-142.906	42.9047	-15.1512	-6.8924	-5.1016	-20.1078	-31.1215	-9.57553	-18.881	-24.9907	-3.73528	-174.979	-129.53	-1.58695	-14.357	-18.7355	-14.1576	162.685	-1.77293	10.2229	-7.41923	0.062025	0.80865	10.9164	-45.847	-55.6701	-41.2125	-21.4075	-3.6598	0.8458	6.0512	-39.9496	-84.4416	-8.56975	-34.4431
515	6Su-LDN	GalNAcb1-4(6S)GlcNAc-Sp8	-35.2942	-69.3412	-18.9705	-25.1652	-18.4926	-21.3546	29030.2	2929.48	1856.86	-17.8893	-21.6201	-13.2796	-198.277	-75.2413	256.104	4.47355	-23.6468	-33.5797	7.00585	-14.3393	12.7472	-10.153	-5.06942	-0.026375	-5.6495	51.5221	-44.9844	-20.785	-25.159	1122.26	8.61148	10.0522	7865.07	235.224	-4.38775	-72.6306
516	3'Su-LDN	(3S)GalNAcb1-4GlcNAc-Sp8	-82.7333	-25.8754	15.9726	-20.5866	-12.6565	-14.7468	-28.9844	-20.6346	5.54785	-11.9842	-15.0994	-1.78608	-87.8353	-39.2934	-1.21683	-19.4858	-12.2901	-14.0956	19918.3	4487.42	265.982	-7.67455	2.0967	-6.76885	-2.9092	-49.0239	-30.1926	-24.5359	-8.594	34.9738	4.91035	3.21613	-26.7131	-27.6504	-19.3004	-14.2732
517	4'Su-GalNAc-b	(4S)GalNacb-Sp10	-205.812	-138.053	-13.5742	-19.4021	-7.28533	-10.2671	-38.9317	-18.9613	-14.2538	-15.4559	-18.7762	-4.72827	-88.8037	-54.5154	720.475	-8.26313	-10.5673	-20.4661	-10.3404	-2.60838	3.33128	-8.14615	1.27997	3.27148	-0.251775	-34.0112	-33.1408	-12.3901	-23.0491	0.81425	7.79632	6.124	-35.0404	-95.5851	-20.0458	-23.6323
518	6P-LacNAc	Galb1-4(6P)GlcNAcb-Sp0	-138.879	-43.9044	6.62542	3.45863	-7.89378	17.6002	-32.537	-9.76965	-3.77903	-9.51148	9.95193	5.86292	-154.681	93.9533	189.636	10.1943	-7.56257	-5.96192	66.9426	-3.35282	0.446825	-7.0624	5.37945	-7.55323	1.39682	-26.495	-43.5252	-6.71288	-14.0476	5309.73	1409.65	166.728	-43.266	-28.1471	-9.63573	0.603025
519	6'P-LacNAc	(6P)Galb1-4GlcNAcb-SP0	-36.1037	-66.6821	-50.6535	-8.87562	-5.31353	-27.3983	-15.1805	-20.8231	-61.3617	21.4818	-7.63385	-31.943	146.213	-36.7059	289.661	22.185	-4.62655	-41.1364	1.58572	-7.89357	-8.06097	-11.5765	5.93652	3.7764	1.41705	-44.0095	38.7902	-19.7565	16.5038	2308.67	480.349	61.6191	-19.8142	-51.2697	-15.7968	-45.664
520	BG-A2 like	GalNAca1-3(Fuca1-2)Galb1-4GlcNAcb1-6GalNAc-Sp14	183.13	-34.8245	7.90297	-4.97905	-4.84788	3.4329	55.1481	33.1244	2.63495	-2.08918	0.90695	7.97727	37.8114	-103.759	334.488	-8.9867	3.76803	-12.4802	-4.59847	-0.465175	-9.81602	18359.4	20400.1	13606.9	2279.07	-11.9907	-13.0137	-10.9646	-11.7482	549.789	70.3968	7.7951	51.0884	-12.4896	-12.3215	-3.73855
521	6'SLacNAc--	Neu5Aca2-6Galb1-4GlcNAcb1-2Man-Sp0	-14.7402	-8.23287	12.8412	6.34705	-7.32558	2.55138	-9.04438	-2.97228	4.92135	-6.15465	5.62095	-2.5256	19995.4	23438.3	8470.3	769.53	487.394	257.914	-0.2204	7.4928	-1.54848	-5.29003	9.39155	-2.8425	-1.80617	-26.2224	-14.9981	-10.6983	-23.7215	4.1277	10.3775	5.51228	-20.476	-46.5366	-14.2422	-22.3782
522	alpha Gal like	Gala1-3Galb1-4GlcNAcb1-2Mana-Sp0	-0.19115	-61.7356	6.14558	-9.11577	-6.90728	8.44337	-26.4071	-14.0241	0.070125	3.5588	14.9379	7.45133	-9.03542	-96.8533	317.191	-3.73858	-3.31448	-22.8747	-6.57925	-0.908	-1.3973	-4.9547	15.1431	2.904	13.6519	-25.7355	-12.9203	4.35273	-16.5649	189.983	119.816	13.9728	-17.5321	6.13323	-16.1717	-3.70392
523	BG-B2 like	Gala1-3(Fuca1-2)Galb1-4GlcNAcb1-2Mana-Sp0	-68.0965	-36.5776	8.05372	-8.40102	-1.6755	-5.7964	-5.16105	-35.2801	18.4867	6.3474	-2.61807	-3.189	-93.0493	-92.4914	266.62	2.6749	0.910325	-18.7337	10.0008	-2.33928	0.3952	-2.7492	6.0678	0.256575	4.42682	32.7553	-6.30002	-2.15845	9.39902	4555.79	792.782	216.634	-36.4514	-45.7013	-6.46613	-7.42963
524	BG-A2 like	GalNAca1-3(Fuca1-2)Galb1-4 GlcNAcb1-2Mana-Sp0	-41.9562	-58.6373	17.0419	-16.8678	-5.7972	-2.7472	-22.8406	30.9341	-0.3892	10.9223	1.90902	-1.2778	-53.6092	-59.4206	628.842	-11.5796	0.06765	-31.9662	-9.89733	-11.5752	-6.80583	19863.7	26618.7	19362.3	3800.96	-6.8135	-22.852	-10.5873	-9.53088	7.16777	8.48365	5.38427	-23.4474	-32.9335	-3.9121	-10.8637
525	LeC like	Galb1-3GlcNAcb1-2Mana-Sp0	4922.5	685.151	108.917	1.29068	-1.0527	2.23525	-42.4791	-10.7237	-7.96065	-6.74155	-1.7913	9.54482	-115.903	-107.753	352.261	-8.56375	3.10737	-28.4151	34.4151	1.84652	4.8976	0.115375	-2.94372	8.65065	13.4692	-14.79	-33.448	-2.5768	-14.0079	644.952	133.069	49.0901	-36.9332	-22.7412	3.69375	2.36067
526	BG-B1 like	Gala1-3(Fuca1-2)Galb1-3GlcNAcb1-6GalNAc-Sp14	256.888	-68.3964	12.4826	3.15768	-6.56327	5.502	-25.0782	0.629875	-2.99432	12.0155	-5.42488	12.7127	-73.7584	-40.6256	191.688	2.42338	2.7286	-25.3701	-6.38685	29.5879	3.87798	-6.39073	-1.27607	1.18103	12.4505	-14.8204	-14.8411	-4.53442	-13.6316	3.6437	12.5371	1.46818	-31.2659	-21.3698	-15.474	-8.01182
527	3'SLeC--	Neu5Aca2-3Galb1-3GlcNAcb1-2Mana-Sp0	19479.1	5897.37	943.201	8.8873	-3.0726	17.3879	-28.2926	12.9284	14.7856	-2.44623	-5.0629	14.8427	4029.81	6941.27	1730.78	64.0412	8.9097	-20.7988	411.781	49.4525	110.221	-4.51712	3.4824	5.08175	7.13063	-17.8931	-18.5019	-1.28985	-6.87943	190.714	60.1096	25.9751	-37.8282	-33.5675	-17.9783	-17.2797
528	Gala-type 1 like	Gala1-3Galb1-3GlcNAcb1-2Mana-Sp0	21797.1	10378	101.431	-6.53995	0.71755	1.12387	-60.563	-8.7422	5.3925	-5.53883	-13.8442	6.30807	-131.153	53.2279	70.0494	-10.9585	-19.7923	-19.5044	-14.1814	-19.7138	6.47073	-6.07663	8.36842	-6.0755	8.40818	-68.7476	-82.8196	-16.0688	-37.9424	643.193	99.5395	30.3024	-71.9032	-114.191	-14.3422	-52.1492
529	LDN-Man	GalNAcb1-4GlcNAcb1-2Mana-Sp0	5787.27	685.065	45.6224	0.001025	2.04898	11.4747	29482.7	22215.4	2665.61	14.8269	11.4677	5.92972	-201.374	122.822	37.7306	-8.52707	-4.15883	-13.0765	42.1238	-18.5553	7.05658	-9.92385	3.1615	3.76277	9.95177	2243.49	-18.0914	-15.9481	-15.9708	1987.36	2.31715	5.31305	32310	1070.77	-0.539575	-29.7374
530	3'SLeC--	Neu5Aca2-3Galb1-3GlcNAcb1-4Galb1-4Glcb-Sp0	63.9752	90.0556	115.162	1.84797	-4.26067	0.7039	-3.54482	-6.66263	-5.62727	-1.64123	-10.2974	16.7293	157.595	355.14	302.708	-11.841	-3.1479	-4.2487	8.00483	-9.68288	16.3825	-10.0239	12.6172	2.4603	-3.57717	-15.297	-22.3663	1.96752	-3.9138	-1.37912	4.74012	20.9278	-6.47868	-18.2217	-9.0663	-16.3285
531	NGA2BF	GlcNAcb1-2 Mana1-6(GlcNAcb1-4)(GlcNAcb1-2Mana1-3)Manb1-4GlcNAcb1-4(Fuca1-6)GlcNAc-Sp21	29285.4	23560.8	2263.36	94.5212	80.4859	28.3233	24711	9021.21	764.838	0.330675	2.74275	5.67005	-49.682	-121.95	40.4819	-13.3634	-10.9862	-13.3201	-4.9208	-1.77845	6.44185	-3.69228	6.47518	3.6726	5.1024	117.36	-18.0711	-9.60595	-10.0269	411.576	5.00417	6.46753	-21.0003	-26.3179	-6.37492	-17.6294
532	NA2BF	Galb1-4GlcNAcb1-2 Mana1-6(GlcNAcb1-4)(Galb1-4GlcNAcb1-2Mana1-3)Manb1-4GlcNAcb1-4(Fuca1-6)GlcNAc-Sp21	472.514	79.6458	13.7371	-0.052525	5.32657	-2.73592	-12.5444	-11.3626	-6.66107	0.31145	-9.176	6.25105	37.9257	7.90512	9.35672	-5.63487	-0.295225	-14.5007	-4.02425	8.31938	-9.96693	-2.8577	7.27085	-1.35827	3.0172	-6.64585	-23.4308	-8.06125	-8.16368	40261.7	35975.4	11462.3	-22.6682	-35.6889	-0.34415	-14.766
533	NA3F	Galb1-4GlcNAcb1-2 Mana1-6(Galb1-4GlcNAcb1-4)(Galb1-4GlcNAcb1-2Mana1-3)Manb1-4GlcNAcb1-4(Fuca1-6)GlcNAc-Sp21	62.9065	55.6016	11.4081	4.76483	-8.969	-4.37418	-17.0405	8.77922	11.4879	4.59487	-8.1536	8.27838	153.021	-22.1159	133.622	-7.79417	3.86965	-3.1122	0.520775	4.55692	13.941	-3.32942	6.22928	2.28163	5.89668	-19.3356	-19.7901	4.72828	-11.3163	40282.9	33256	6616.11	-15.3919	-20.5169	-5.86178	-25.8371
534	LeA--	Fuca1-4(Galb1-3)GlcNAcb1-2 Mana-Sp0	-54.2195	-11.4044	62.648	11.8377	-2.18683	4.9357	-18.1945	51.2646	11.3369	-9.87865	-7.38935	13.6386	-132.023	6.6808	161.054	25.3246	-7.54762	5.78608	9.06612	18.9284	5.6825	15.1374	32.7117	4.02263	2.49095	-35.7281	-21.1083	-4.01915	-16.7086	125.841	60.6032	49.136	-36.4616	-32.7541	-8.62975	-10.8684
535	SLeX like	Neu5Aca2-3Galb1-4(Fuca1-3)GlcNAcb1-2Mana-Sp0	-19.5157	-19.4774	46.452	-2.32945	0.579225	9.01923	-21.1809	-3.20618	0.61145	-5.05417	-7.22698	7.38712	-66.7954	54.7974	236.076	-3.10792	-6.89855	-12.0328	147.715	14.7053	4.09548	-11.5327	3.93947	7.16235	2.9249	-12.2626	-41.0888	-15.3361	-17.3135	9.33855	6.6462	32.5903	-17.6205	-9.50415	-7.16005	-13.5766
536		GlcNAcb1-3Galb1-4GlcNAcb1-6(GlcNAcb1-3)Galb1-4GlcNAc-Sp0	-10.6844	-46.0955	-11.4214	-4.92268	-3.08535	4.83737	41187.1	28757.6	691.911	9.89173	-10.1561	2.2584	-211.852	590.274	27.3969	-9.64183	-4.62482	-18.4563	33.3689	22.3829	72.2895	-4.6833	11.0252	-0.902875	-2.16015	507.35	-27.76	-6.82025	-21.3226	35.9136	0.472075	3.52605	-49.0852	-51.6734	35.1863	-33.1248
537	Globo A	GalNAca1-3(Fuca1-2)Galb1-3GalNAcb1-3Gala1-4Galb1-4Glc-Sp21	-221.318	-99.0126	3.60373	-26.1876	-15.0501	-2.49518	-70.7273	-27.432	-11.6057	-18.2404	-10.1931	-6.69288	73.8953	-53.3381	331.786	-10.7894	-16.5029	-37.548	21.8147	-7.30408	27.4159	23988.4	26288.2	20037.1	4328.52	-46.1249	-44.1522	-22.8559	-32.3387	-0.90575	2.4678	9.01965	-52.512	-61.7488	-13.8202	-23.4793
538	BG-B1 like	Gala1-3(Fuca1-2)Galb1-3GalNAcb1-3Gala1-4Galb1-4Glc-Sp21	-129.927	-62.6608	-1.9333	-1.40605	-6.35608	2.9147	-38.5938	-26.3462	-6.16545	-9.1562	-13.6376	0.815775	-172.69	103.748	48.2599	-4.36005	-4.52555	-18.8563	161.941	13.5596	7.59098	-4.21305	4.07737	5.58877	-2.10168	-39.5978	-24.6992	-21.392	-12.5243	-1.161	7.38883	2.6891	-26.4424	-43.5656	-17.8248	-10.1304
539	Gb5 tri	Galb1-3GalNAcb1-3Gal-Sp21	-227.888	-140.197	-11.2565	-12.6115	-10.1012	0.773575	-60.9685	-36.157	-9.82437	-19.3872	-8.41673	9.98563	-135.559	5.69835	235.365	-9.33735	-10.2686	-21.6512	-2.81303	-9.82927	12.6704	-2.45135	-5.12958	12.9152	0.926075	7578.17	1075.14	-15.36	-33.3817	28.5713	20.7035	1.7581	-34.4622	-65.8459	-21.0886	-33.1208
540	GlcNAc ext 2 arms1	GlcNAcb1-3Galb1-4GlcNAcb1-2Mana1-6(GlcNAcb1-3Galb1-4GlcNAcb1-2Mana1-3)Manb1-4GlcNAcb1-4GlcNAcb-Sp12	49090.1	32717.3	4660.19	0.108375	-19.0708	-33.8743	69.8219	-33.1842	-46.7954	8.66665	-17.2347	-55.1176	-48.1959	-14.2703	316.986	-11.5137	-14.4703	-65.9252	-12.9487	-16.8144	-16.5993	-10.3541	4.728	1.09215	8.49468	-41.2234	6.11123	-23.8284	14.8845	1000.26	9.82672	1.40063	-29.6871	-71.1214	-18.5821	-52.8422
541	GlcNAc ext 2 arms1	GlcNAcb1-3Galb1-4GlcNAcb1-2Mana1-6(GlcNAcb1-3Galb1-4GlcNAcb1-2Mana1-3)Manb1-4GlcNAcb1-4GlcNAcb-Sp25	40426.7	33117.8	5180.2	152.544	114.839	34.8336	2270.83	126.942	57.4899	-8.07292	10.0606	21.1452	-169.742	315.936	323.231	26.1938	-13.5671	-6.56177	326.827	32.4347	49.7226	-1.07878	5.35547	19.5244	15.1222	-14.9441	20.4103	-12.2209	-0.920975	1659.71	24.2108	28.0725	-11.1487	-31.2756	-13.9557	8.96227
542	LacNAc ext 2 arms2	Galb1-4GlcNAcb1-3Galb1-4GlcNAcb1-2Mana1-6(Galb1-4GlcNAcb1-3Galb1-4GlcNAcb1-2Mana1-3)Manb1-4GlcNAcb1-4GlcNAcb-Sp12	1965.59	460.187	375.158	68.8739	108.38	98.1416	98.1644	96.2856	124.492	47.2873	68.2847	102.234	700.246	139.198	2621.47	139.3	65.1088	181.821	80.8951	115.813	80.7387	123.993	129.925	194.946	149.474	89.568	205.764	79.3069	132.966	3801.9	2540.87	1006.36	112.117	186.445	98.6703	155.46
543	LacNAc ext 2 arms2	Galb1-4GlcNAcb1-3Galb1-4GlcNAcb1-2Mana1-6(Galb1-4GlcNAcb1-3Galb1-4GlcNAcb1-2Mana1-3)Manb1-4GlcNAcb1-4GlcNAcb-Sp24	38920.3	30325.8	3546.4	77.5578	5.23402	25.0977	7.63287	15.6123	30.3863	-6.29	29.0226	10.9575	248.061	-90.221	963.24	4.8087	6.64895	16.2121	333.158	31.5849	6.24465	4.12957	22.5208	10.1456	3.8554	11.2852	38.5793	-0.939625	11.1922	43044.6	33506.5	4680.82	-15.0591	27.1221	3.38382	27.3245
544	3'S(Gc)LacNAc--	Neu5Gca2-3Galb1-4GlcNAcb1-3Galb1-4GlcNAcb1-2Mana1-6(Neu5Gca2-3Galb1-4GlcNAcb1-3Galb1-4GlcNAcb1-2Mana1-3)Manb1-4GlcNAcb1-4GlcNAcb-Sp24	35231.3	15409.5	889.289	10.8482	17.33	-5.93042	-11.3647	17.3441	58.6997	-3.48037	3.78547	26.3159	95.7163	-103.332	2480.37	10.4335	-3.87228	-0.7281	19807.6	8617.22	927.498	1.58528	14.6459	11.024	8.14593	-14.2272	-10.9819	-7.71415	-13.5096	220.921	61.2171	32.5942	-10.2206	-7.28677	11.5051	-3.0346
545	BG-H2 like	Fuca1-2Galb1-4GlcNAcb1-3Galb1-4GlcNAcb1-2Mana1-6(Fuca1-2Galb1-4GlcNAcb1-3Galb1-4GlcNAcb1-2Mana1-3)Manb1-4GlcNAcb1-4GlcNAcb-Sp24	45293.5	30494.3	2098.1	16.6361	18.0045	41.4604	-13.7985	32.8454	14.0703	4.57795	24.7293	15.6269	14.0184	533.564	1427.36	9.0521	3.33968	16.4033	22.1029	26.4325	29.1397	23.6484	23.6972	15.3715	9.70317	2.02818	3.8645	-0.68765	7.28473	20832	4386.61	1185.85	57.0498	-7.76817	3.81092	0.605725
546	GlcNAc ext 2 arms2	GlcNAcb1-3Galb1-4GlcNAcb1-3Galb1-4GlcNAcb1-2Mana1-6(GlcNAcb1-3Galb1-4GlcNAcb1-3Galb1-4GlcNAcb1-2Mana1-3)Manb1-4GlcNAcb1-4GlcNAcb-Sp12	11948.6	3213.57	332.434	70.2181	80.2089	109.861	117.151	120.073	102.924	65.1415	75.7817	90.5834	80.1518	397.957	1694.35	62.7507	60.9515	90.5512	100.164	160.687	118.927	61.0696	103.293	138.089	103.536	50.2481	110.323	59.1879	86.8416	342.756	280.726	147.888	62.1968	54.6445	45.0446	100.68
547	GlcNAc ext 2 arms2	GlcNAcb1-3Galb1-4GlcNAcb1-3Galb1-4GlcNAcb1-2Mana1-6(GlcNAcb1-3Galb1-4GlcNAcb1-3Galb1-4GlcNAcb1-2Mana1-3)Manb1-4GlcNAcb1-4GlcNAcb-Sp25	43817	28654.5	2767.56	4.6806	-3.38795	1.49582	18237.7	2682.15	357.523	13.8464	6.80152	13.895	-60.6543	-109.721	1296.6	21.1532	11.1381	-7.2639	21.167	13.7827	4.89718	11.1593	10.6156	8.82648	11.4874	2.80175	-9.67258	-4.01883	-0.34975	972.011	17.9388	6.30787	-13.7711	-14.5225	-12.5005	0.808975
548	LacNAc ext 2 arms3	Galb1-4GlcNAcb1-3Galb1-4GlcNAcb1-3Galb1-4GlcNAcb1-2Mana1-6(Galb1-4GlcNAcb1-3Galb1-4GlcNAcb1-3Galb1-4GlcNAcb1-2Mana1-3)Manb1-4GlcNAcb1-4GlcNAcb-Sp12	34378.4	11756.8	541.278	114.278	133.043	186.654	248.116	224.459	174.891	121.453	151.631	195.564	67.9542	601.754	532.836	171.236	143.463	104.343	849.258	253.154	451.773	77.7242	117.749	207.666	138.604	138.867	184.159	91.758	150.72	35834.6	6952.9	2847.64	133.768	215.777	70.9666	207.401
549	LacNAc ext 2 arms3	Galb1-4GlcNAcb1-3Galb1-4GlcNAcb1-3Galb1-4GlcNAcb1-2Mana1-6(Galb1-4GlcNAcb1-3Galb1-4GlcNAcb1-3Galb1-4GlcNAcb1-2Mana1-3)Manb1-4GlcNAcb1-4GlcNAcb-Sp24	49497.3	35989	2591.86	24.1186	-3.47075	8.69025	106.43	54.8092	16.6685	12.5998	12.2917	21.1983	305.89	-28.8974	849.996	6.56823	10.0843	8.98523	1009.45	51.1806	14.2639	6.55205	21.3579	12.1279	12.3751	-12.8502	-13.8312	-10.204	5.55845	25372.3	43958.6	7627.92	6.38175	-13.9301	-7.75257	7.33945
550	GlcNAc ext 2 arms3	GlcNAcb1-3Galb1-4GlcNAcb1-3Galb1-4GlcNAcb1-3Galb1-4GlcNAcb1-2Mana1-6(GlcNAcb1-3Galb1-4GlcNAcb1-3Galb1-4GlcNAcb1-3Galb1-4GlcNAcb1-2Mana1-3)Manb1-4GlcNAcb1-4GlcNAcb-Sp25	40662.4	30169.3	784.068	3.30203	3.95815	9.24803	30677.3	8919.17	396.151	-3.48182	-0.624125	12.001	-95.4862	70.478	127.119	4.59172	-10.6066	0.35095	-17.9354	-15.5084	-10.2725	39.7221	74.375	35.845	10.1381	236.745	-70.4585	-12.9741	-43.304	148.26	27.8595	13.2253	-64.976	-114.361	-19.962	-38.4049
551	LacNAc ext 2 arms4	Galb1-4GlcNAcb1-3Galb1-4GlcNAcb1-3Galb1-4GlcNAcb1-3Galb1-4GlcNAcb1-2Mana1-6(Galb1-4GlcNAcb1-3Galb1-4GlcNAcb1-3Galb1-4GlcNAcb1-3Galb1-4GlcNAcb1-2Mana1-3)Manb1-4GlcNAcb1-4GlcNAcb-Sp25	54931.5	31027.3	956.213	12.791	19.8196	15.0719	70.3219	176.308	34.027	-1.6003	4.0965	7.9167	-96.4174	234.05	115.626	-0.746425	2.54593	-5.69303	1697.95	-14.3591	37.69	33.7617	33.3132	29.0499	12.6985	-35.3759	-12.5708	-16.0532	-8.02625	39312	32379	8319.79	44.3712	-33.2546	-13.4294	-7.51035
552	LeC ext 2 arms1	Galb1-3GlcNAcb1-3Galb1-4GlcNAcb1-2Mana1-6(Galb1-3GlcNAcb1-3Galb1-4GlcNAcb1-2Mana1-3)Manb1-4GlcNAcb1-4GlcNAc-Sp25	40350	34748.6	4392.87	112.348	39.5585	3.96297	-6.31295	-6.09525	7.59507	-5.99763	14.7232	3.28233	256.087	-196.012	117.587	-3.09012	11.2715	-16.9158	0.010175	-7.0001	-2.79562	2.58405	8.2142	16.1327	16.7951	-20.2715	-19.1341	0.686375	-5.11178	19536.8	4417.55	736.375	-17.6546	-21.5196	-7.42173	-8.86223
553		Neu5Gca2-8Neu5Gca2-3Galb1-4GlcNAc-Sp0	-18.9805	-16.2452	13.2215	-1.90735	2.9804	-13.4886	-15.9918	-10.9732	-4.5396	19.1064	-9.60275	-6.46138	-118.322	-193.464	77.2369	-5.82875	-10.0043	-27.6035	10095.4	3239.38	526.36	-8.04935	-2.51412	-3.99973	6.30345	-37.8321	-2.24295	-2.2568	-10.0848	-2.68273	6.0407	0.667475	-19.4275	-11.5721	-17.4851	-24.6973
554		Neu5Aca2-8Neu5Gca2-3Galb1-4GlcNAc-Sp0	-23.185	5.51132	10.5708	-6.9168	-7.13563	1.23453	-20.4782	-30.2063	-5.76248	-6.9741	1.967	-8.0255	-55.5787	-112.784	90.2252	-12.3511	-4.75685	0.4208	11437.2	3490.9	334.005	-5.16835	2.16305	0.60075	2.43315	-8.99578	-8.27168	-7.54103	-1.08078	24.7695	3.46342	14.6768	-22.6264	-21.7833	-6.18017	-26.9998
555		Neu5Gca2-8Neu5Aca2-3Galb1-4GlcNAc-Sp0	-25.3851	-30.13	107.33	-6.595	3.70237	-3.62888	-23.2401	-15.3262	-1.63233	-6.73795	-8.21828	-0.37655	-103.175	-55.543	4.99058	-13.8409	-4.97297	-14.9662	7044.02	1929.22	196.335	-0.588375	7.1402	7.77442	7.17188	1.86448	-24.6471	-8.6284	-14.7377	10.8187	-1.04165	2.40822	-44.4228	-27.7341	-6.6392	-21.9369
556		Neu5Gca2-8Neu5Gca2-3Galb1-4GlcNAcb1-3Galb1-4GlcNAc-Sp0	-35.5633	-8.86175	-7.41135	3.17127	-2.98665	-7.20372	-20.3327	10.0668	-9.14932	0.840375	-8.65178	-3.1594	-20.2682	-85.3765	146.132	-4.89255	-3.97693	-1.16167	13267.5	4387.9	209.481	-7.58003	8.25708	-3.02245	3.37938	-20.2079	-10.5373	-6.47785	-13.1894	17.1039	11.4562	5.1303	-33.2384	-37.184	-14.0706	-28.7758
557		Neu5Gca2-8Neu5Gca2-6Galb1-4GlcNAc-Sp0	-49.1966	-8.0372	-0.3538	2.65852	3.05642	19.5337	-29.3409	-10.8142	3.7838	-8.3414	-9.96355	6.999	20576.3	28272.5	2940.73	96.0794	14.9505	-15.4079	10.6634	10.8439	14.8523	-0.23865	6.35562	1.22705	13.6478	-34.5387	-25.6581	-19.6697	-20.3672	2.98398	12.3324	18.1318	-43.3693	-45.4999	-13.1463	-15.3675
558		Neu5Aca2-8Neu5Aca2-3Galb1-4GlcNAc-Sp0	-31.7169	-10.7283	18.6447	3.94758	-6.11937	0.010925	-24.1417	-14.7946	7.7679	-11.2917	-8.30045	4.18332	-115.771	-47.0061	102.842	-4.39965	-8.66817	-11.405	7826.19	2093.07	116.402	-9.84752	6.56495	12.4707	4.46655	-21.3773	-22.4185	-14.653	-19.9197	10.6203	-0.212175	5.7105	-10.6301	-28.2513	-14.7628	-14.2151
559	GlcNAc ext 3 arms1	GlcNAcb1-3Galb1-4GlcNAcb1-6(GlcNAcb1-3Galb1-4GlcNAcb1-2)Mana1-6(GlcNAcb1-3Galb1-4GlcNAcb1-2)Man a1-3)Manb1-4GlcNAcb1-4GlcNAc-Sp24	983.909	595.895	130.445	20.0643	5.39497	8.42282	11118.5	958.537	77.5853	1.2721	4.1745	10.9183	793.655	3195.69	893.571	10.7704	9.68252	1.9796	164.866	64.2516	225.088	58.0831	100.548	61.1187	13.3728	-43.0238	-0.895275	-0.94935	10.8003	88.7614	0.899775	7.31413	-44.0275	-34.7201	41.3464	5.5421
560	LacNAc ext 3 arms2	Galb1-4GlcNAcb1-3Galb1-4GlcNAcb1-6(Galb1-4GlcNAcb1-3Galb1-4GlcNAcb1-2)Mana1-6(Galb1-4GlcNAcb1-3Galb1-4GlcNAcb1-2Mana1-3)Mana1-4GlcNAcb1-4GlcNAc-Sp24	2349.17	1319.27	780.647	2.52165	-5.58085	-0.631575	-46.4414	-23.6963	-16.2367	-14.9634	9.8169	-10.0262	1081.12	2917.95	5474.56	-5.9812	-5.1313	-28.3886	30.8535	22.8377	32.8653	66.6635	63.6621	45.6243	24.0589	-22.9237	-30.5358	-5.61495	-14.1734	35472.4	22081.9	3201.04	-36.3019	-44.893	-17.5252	-22.0405
561	alpha Gal like	Gala1-3Galb1-4GlcNAcb1-2Mana1-6(Gala1-3Galb1-4GlcNAcb1-2Mana1-3)Manb1-4GlcNAcb1-4GlcNAc-Sp24	37351.7	35826.8	6329.14	258.636	134.546	25.6022	-29.9943	23.0164	49.3287	0.23675	2.93837	19.5713	150.071	35.125	323.758	4.65322	-1.91315	-5.5881	295.437	155.65	183.709	8.47995	19.1197	26.4156	2.7685	6.67323	-12.8792	-5.7772	-1.58045	26046	6192.02	1144.52	-30.4766	16.6489	8.20603	36.5872
562		GlcNAcb1-3Galb1-4GlcNAcb1-6(GlcNAcb1-3Galb1-3)GalNAca-Sp14	-240.491	-115.514	133	-17.7429	6.32573	-17.902	-54.5293	-34.3378	-11.997	-12.9341	-4.5014	-9.11465	-88.2687	-70.8991	464.705	-19.7262	-13.273	-27.0643	29.78	10.4691	22.6249	-8.79867	2.29902	6.89977	1.6282	-35.8677	-58.8826	-5.26425	-15.2226	-2.86488	8.89495	6.48512	-44.6255	-72.2788	-12.4092	-23.2891
563		GalNAcb1-3GlcNAcb-Sp0	-90.9354	-63.5168	-14.4924	-16.6188	-11.324	-7.1014	-42.6535	-25.7493	-11.9069	-15.3682	-7.11773	-4.7163	-182.13	-101.046	54.9693	-15.637	-9.08397	-17.6843	41.1825	9.79257	35.2208	-7.57032	0.669125	-0.9946	6.07593	-27.1259	-33.4015	-12.6404	-10.3686	5.08068	3.21547	19.9948	2665.18	-47.136	-10.3369	-25.2484
564	LDN (dimeric)	GalNAcb1-4GlcNAcb1-3GalNAcb1-4GlcNAcb-Sp0	-131.34	-120.59	89.3677	-16.1303	-18.2263	-9.52037	42648.2	37797.4	14810.1	631.097	67.4119	3.28048	-297.191	108.446	325.99	-13.149	-13.473	-26.3161	57.2737	9.664	74.1079	-7.8703	-1.32725	-1.21127	-6.16502	2423.26	-32.4188	-9.55667	-19.4521	4873.77	5.67952	8.61177	37966.9	5216.11	113.802	-34.6411
565	GlcNAc ext 3 arms4	GlcNAcb1-3Galb1-4GlcNAcb1-3Galb1-4GlcNAcb1-3Galb1-4GlcNAcb1-3Galb1-4GlcNAcb1-2Mana1-6(GlcNAcb1-3Galb1-4GlcNAcb1-3Galb1-4GlcNAcb1-3Galb1-4GlcNAcb1-3Galb1-4GlcNAcb1-2Mana1-3)Manb1-4GlcNAcb1-4GlcNAcb-Sp25	39454.7	35255.7	1397.92	16.1018	1.51655	17.9578	33867.7	5446.21	386.44	-8.31487	5.85438	5.51025	-102.701	481.709	279.335	-0.9012	4.41662	-8.9738	634.093	87.2593	203.617	47.4455	43.3527	32.5739	19.6599	364.503	7.90415	-19.8039	-9.90532	1003.33	28.2486	17.8819	-21.8401	-27.5413	-3.20127	-3.42755
566	LacNAc ext 2 arms5	Galb1-4GlcNAcb1-3Galb1-4GlcNAcb1-3Galb1-4GlcNAcb1-3Galb1-4GlcNAcb1-3Galb1-4GlcNAcb1-2Mana1-6(Galb1-4GlcNAcb1-3Galb1-4GlcNAcb1-3Galb1-4GlcNAcb1-3Galb1-4GlcNAcb1-3Galb1-4GlcNAcb1-2Mana1-3)Manb1-4GlcNAcb1-4GlcNAcb-Sp25	41498.1	36021.7	1851	29.1254	4.81237	5.16405	977.516	151.424	54.1458	-2.56003	8.9497	7.02958	208.156	431.061	607.062	-10.2643	18.4788	-3.30457	1605.89	-7.37245	-14.3804	9.9086	17.185	29.9175	20.4027	-16.2564	-14.0478	-15.0092	-16.3951	39751.5	35070.8	4887.36	133.294	-74.8803	-6.65097	-12.3451
567		GlcNAb1-3Galb1-3GalNAc-Sp14	-93.3542	-50.7892	46.3772	-4.44553	-6.8555	2.76365	-49.3323	0.8059	-2.343	-10.2563	-5.95883	2.98022	-314.758	-18.972	65.8258	-2.54312	-11.3404	-11.2826	105.619	7.5306	16.5601	-3.78715	6.71785	0.514825	6.06735	-22.6806	-43.108	-13.8377	-18.735	-2.03368	14.1207	4.59952	-27.6092	-58.4478	1.1699	-8.50105
568		Galb1-3GlcNAcb1-6(Galb1-3)GalNAc-Sp14	567.175	613.848	87.8631	-6.88943	-4.4027	-4.41127	-48.8357	-12.0956	-7.72258	-14.6888	-7.52653	4.0942	-218.401	-70.089	76.668	-2.1073	-18.3853	-13.2448	61.6588	24.0413	48.3419	2.8958	16.5048	0.119725	9.27547	118.72	-22.4817	-12.8319	-23.782	537.361	62.5849	29.3394	-37.4998	-71.5807	-23.8719	-40.3251
569	LacNAc ext 2 arms6	Galb1-4GlcNAcb1-3Galb1-4GlcNAcb1-3Galb1-4GlcNAcb1-3Galb1-4GlcNAcb1-3Galb1-4GlcNAcb1-3Galb1-4GlcNAcb1-2Mana1-6(Galb1-4GlcNAcb1-3Galb1-4GlcNAcb1-3Galb1-4GlcNAcb1-3Galb1-4GlcNAcb1-3Galb1-4GlcNAcb1-3Galb1-4GlcNAcb1-2Mana1-3)Manb1-4GlcNAcb1-4GlcNAcb-Sp25	43077.7	24932.9	818.155	12.2183	5.6476	8.04585	391.532	507.68	29.3621	-1.08367	-1.515	7.0912	-118.145	1182.57	272.278	-3.50975	-5.77195	-4.6056	1048.69	99.9356	553.888	50.5577	51.9217	29.8846	8.35112	-66.2562	-35.0478	-22.1077	-6.39745	39090.8	24287.5	13124.5	17.5061	-80.1486	-12.8258	-31.6616
570		(3S)GlcAb1-3Galb1-4GlcNAcb1-3Galb1-4Glc-Sp0	-85.8724	-40.05	26.5278	-10.8074	7.72255	-8.70713	-41.0351	-4.6628	13.4486	-15.4285	-4.14532	18.396	-227.77	-9.29683	102.312	-9.97935	-13.7664	-32.3141	44.9539	25.0603	25.5302	-6.3672	6.087	1.26347	7.3271	-52.3393	-43.2295	-11.324	-34.6775	1.6592	2.35425	5.87817	-37.5911	-39.4004	-9.4354	-28.0932
571		(3S)GlcAb1-3Galb1-4GlcNAcb1-2Mana-Sp0	46.6014	-103.321	62.2599	-6.21978	-9.31592	-11.3724	-20.7586	9.3494	-9.06922	-2.9732	-9.74365	8.92685	-266.788	240.106	64.5274	-12.4991	-8.44562	-25.624	42.1386	-6.39668	17.5442	-8.2547	-1.55333	3.02605	12.1918	-38.3266	-99.4746	-15.2765	-31.5364	-2.03247	1.81525	6.36382	-86.9672	-115.675	-17.8246	-22.3704
572	LeC ext 3 arms1	Galb1-3GlcNAcb1-3Galb1-4GlcNAcb1-3Galb1-4GlcNAcb1-6(Galb1-3GlcNAcb1-3Galb1-4GlcNAcb1-3Galb1-4GlcNAb1-2)Mana1-6(Galb1-3GlcNAcb1-3Galb1-4GlcNAcb1-3Galb1-4GlcNAcb1-2Mana1-3)Manb1-4GlcNAcb1-4(Fuca1-6)GlcNAcb-Sp24	9260.64	7038.33	1526.85	20.3352	44.1758	16.1087	-28.5428	64.013	35.311	24.6534	32.9157	14.2695	176.946	344.533	457.293	15.0255	14.3807	-19.129	499.858	54.5754	267.214	36.4217	38.9339	34.2359	17.1279	-9.81598	-14.6951	-10.8579	-17.1565	8980.1	718.596	268.218	-29.9053	-3.07097	-8.88095	-5.61055
573	LeC ext 3 arms+F	Galb1-3GlcNAcb1-3Galb1-4GlcNAcb1-6(Galb1-3GlcNAcb1-3Galb1-4GlcNAb1-2)Mana1-6(Galb1-3GlcNAcb1-3Galb1-4GlcNAcb1-2Mana1-3)Manb1-4GlcNAcb1-4(Fuca1-6)GlcNAcb-Sp24	11385.3	8916.7	1560.61	36.0487	24.7944	18.2653	227.261	168.19	41.8187	6.45725	18.3591	12.2274	60.6694	1144.67	138.688	23.2757	0.3189	-2.4441	-18.2855	-33.5217	-11.5053	36.3995	30.2017	22.0005	12.0413	-76.2714	-56.6086	-24.0202	-16.4703	8462.02	994.152	510.543	-81.9591	-126.582	-3.6496	-30.7964
574	GT1a	Neu5Aca2-8Neu5Aca2-3Galb1-3GalNAcb1-4(Neu5Aca2-3)Galb1-4Glc-Sp21	-71.2588	-73.081	10.9148	-5.72028	-10.7809	-4.36827	-24.9907	-2.65735	6.92825	-1.05498	-16.5337	13.9553	18.6972	17.7021	19.4909	-4.25127	-10.9245	-18.0592	-8.20887	-19.2609	2.91815	-4.98347	5.17375	5.44618	11.4178	-28.7262	-29.0497	-24.8554	-36.1039	-1.02252	15.8463	0.57815	-32.6468	-51.9023	-5.566	-15.7187
575	GlcNAc ext 2 arms+F	GlcNAcb1-3Galb1-4GlcNAcb1-2Mana1-6(GlcNAcb1-3Galb1-4GlcNAcb1-2Mana1-3)Manb1-4GlcNAcb1-4(Fuca1-6)GlcNAcb-Sp24	45610.5	37581	5449.64	175.373	52.0719	34.3192	431.089	39.7573	24.3094	-12.638	9.35428	4.19978	-90.103	178.823	2261.37	3.07145	-6.66323	-27.9418	65.4594	69.5461	79.0665	10.8416	31.8017	16.7256	17.701	-0.8952	-10.6732	-10.898	9.19548	964.464	40.0927	19.3431	-29.9907	-10.7786	-14.2605	20.9253
576	LacNAc ext 2 arms+F	Galb1-4GlcNAcb1-3Galb1-4GlcNAcb1-2Mana1-6(Galb1-4GlcNAcb1-3Galb1-4GlcNAcb1-2Mana1-3)Manb1-4GlcNAcb1-4(Fuca1-6)GlcNAcb-Sp24	37709	41914.1	3353.67	97.2415	54.4688	9.03065	-38.8156	-24.4049	22.7233	-12.93	14.1725	26.6692	-44.8494	107.746	443.394	27.5726	-4.9537	-0.729975	839.568	130.962	160.61	2.82958	14.7505	26.4706	27.8659	-37.2104	4.43533	-11.1779	7.98005	37648.7	37800.8	7762.1	-11.882	21.6557	-8.70195	5.3156
577	GlcNAc ext 2 arms+F	GlcNAcb1-3Galb1-4GlcNAcb1-3Galb1-4GlcNAcb1-2Mana1-6(GlcNAcb1-3Galb1-4GlcNAcb1-3Galb1-4GlcNAcb1-2Mana1-3)Manb1-4GlcNAcb1-4(Fuca1-6)GlcNAcb-Sp24	44745.7	27252.2	2793.38	-13.8965	1.32645	22.6159	5326.63	467.116	79.6389	-14.7896	24.2082	34.7655	-143.887	-110.537	732.2	-12.1984	-10.7204	-26.1125	109.638	106.205	186.861	57.1437	35.4096	37.9537	19.7647	-20.0871	-12.7336	-14.0771	-14.2583	1248.28	28.9206	21.474	-21.8959	-28.1364	-18.0787	-8.93983
578	LacNAc ext 2 arms+F	Galb1-4GlcNAcb1-3Galb1-4GlcNAcb1-3Galb1-4GlcNAcb1-2Mana1-6(Galb1-4GlcNAcb1-3Galb1-4GlcNAcb1-3Galb1-4GlcNAcb1-2Mana1-3)Manb1-4GlcNAcb1-4(Fuca1-6)GlcNAcb-Sp24	42862.1	40080.3	2032.24	-8.24338	-8.63987	13.2543	4.69395	43.2673	10.6926	-14.9509	-7.73295	23.5813	-112.669	-45.2407	301.547	11.53	-19.433	-23.7697	2682.43	183.056	353.234	16.4396	22.9921	8.79042	3.23255	-25.7233	-27.5994	-13.7905	-3.75625	36562.1	39113.2	8500.92	-2.8564	-41.6353	-4.26427	-9.83865
579	GlcNAc ext 2 arms+F	GlcNAcb1-3Galb1-4GlcNAcb1-3Galb1-4GlcNAcb1-3Galb1-4GlcNAcb1-2Mana1-6(GlcNAcb1-3Galb1-4GlcNAcb1-3Galb1-4GlcNAcb1-3Galb1-4GlcNAcb1-2Mana1-3)Manb1-4GlcNAcb1-4(Fuca1-6)GlcNAcb-Sp24	48324.5	30955.2	1858.74	-6.26565	-3.04288	21.1597	18392.8	1142.09	207.733	-27.5649	19.5362	57.3413	-228.827	10.2195	782.499	10.1376	-12.0092	-31.4562	117.582	76.3592	254.282	60.2482	83.5783	30.8833	5.72993	131.836	-0.125025	-11.6344	-17.5381	1931.15	42.988	21.6126	-34.1053	-37.3985	-13.0995	6.00652
580	LacNAc ext 2 arms+F	Galb1-4GlcNAcb1-3Galb1-4GlcNAcb1-3Galb1-4GlcNAcb1-3Galb1-4GlcNAcb1-2Mana1-6(Galb1-4GlcNAcb1-3Galb1-4GlcNAcb1-3Galb1-4GlcNAcb1-3Galb1-4GlcNAcb1-2Mana1-3)Manb1-4GlcNAcb1-4(Fuca1-6)GlcNAcb-Sp24	40355	33289.3	1201.74	-1.9187	-5.34417	47.3274	355.285	149.418	28.3945	-0.97125	3.34345	8.81315	-95.1942	738.103	334.142	12.6368	1.38552	-4.68127	2493.55	131.468	263.734	9.1906	30.5244	13.4302	4.97268	-12.682	-17.2238	-8.68743	-9.25848	41569.5	37709.1	7090.19	68.7826	-39.7991	-23.0438	-7.95595
581	GlcNAc ext 2 arms+F	GlcNAcb1-3Galb1-4GlcNAcb1-3Galb1-4GlcNAcb1-3Galb1-4GlcNAcb1-3Galb1-4GlcNAcb1-2Mana1-6(GlcNAcb1-3Galb1-4GlcNAcb1-3Galb1-4GlcNAcb1-3Galb1-4GlcNAcb1-3Galb1-4GlcNAcb1-2Mana1-3)Manb1-4GlcNAcb1-4(Fuca1-6)GlcNAcb-Sp19	48815.2	41158.5	2337.06	15.841	6.58253	13.7713	34366.8	3335.43	550.893	-5.3306	2.66017	4.57515	-110.792	-38.6645	752.3	-5.6953	11.0231	-19.7367	2.4272	-25.7551	-5.7641	68.8126	44.8567	22.834	24.3018	327.461	-9.8257	-3.91023	-22.1403	6994.94	216.775	42.7968	-44.1631	-48.2566	-12.187	-16.799
582	LacNAc ext 2 arms+F	Galb1-4GlcNAcb1-3Galb1-4GlcNAcb1-3Galb1-4GlcNAcb1-3Galb1-4GlcNAcb1-3Galb1-4GlcNAcb1-2Mana1-6(Galb1-4GlcNAcb1-3Galb1-4GlcNAcb1-3Galb1-4GlcNAcb1-3Galb1-4GlcNAcb1-3Galb1-4GlcNAcb1-2Mana1-3)Manb1-4GlcNAcb1-4(Fuca1-6)GlcNAcb-Sp19	45269.6	29651.4	1463.11	28.6355	21.7535	-6.43417	560.316	220.922	32.3159	-10.8066	-0.631675	-2.5164	-80.4245	879.595	222.608	-2.37613	-13.5904	-18.8244	3308.74	39.1705	147.321	63.6548	72.2174	47.935	26.6946	-33.2518	-26.1149	-12.9851	-10.0943	38630.6	35506	5742.23	119.317	-45.755	-12.0712	-8.78635
583	LacNAc ext 3 arms+F	Galb1-4GlcNAcb1-3Galb1-4GlcNAcb1-6(Galb1-4GlcNAcb1-3Galb1-4GlcNAb1-2)Mana1-6(Galb1-4GlcNAcb1-3Galb1-4GlcNAcb1-2Mana1-3)Manb1-4GlcNAcb1-4(Fuca1-6)GlcNAcb-Sp24	7.3784	29.8165	118.445	-0.9014	-3.201	27.4442	-43.3945	28.7386	11.7934	-17.4899	7.9531	5.17462	-13.431	1530.26	328.398	9.41662	-8.33658	-15.2668	1499.12	243.643	639.533	5.9182	12.6343	11.7023	10.1303	-30.4016	-34.7711	-10.7005	-13.8042	39097.1	33573.2	10670.4	-12.1949	-73.4558	-17.312	-9.54733
584	GlcNAc ext 3 arms+F	GlcNAcb1-3Galb1-4GlcNAcb1-3Galb1-4GlcNAcb1-6(GlcNAcb1-3Galb1-4GlcNAcb1-3Galb1-4GlcNAb1-2)Mana1-6(GlcNAcb1-3Galb1-4GlcNAcb1-3Galb1-4GlcNAcb1-2Mana1-3)Manb1-4GlcNAcb1-4(Fuca1-6)GlcNAcb-Sp24	465.058	129.366	55.4675	6.75058	0.03085	7.58135	30490.6	9724.5	539.691	3.65803	39.4168	31.8758	-204.349	588.017	16.2424	9.71667	-2.51983	-12.2563	322.091	134.107	472.53	41.2968	42.256	22.4116	16.0872	44.6026	-11.7943	-15.4909	-11.0188	42.8917	50.2326	26.2098	-57.7724	-76.3508	-4.04765	4.63812
585	LacNAc ext 3 arms+F	Galb1-4GlcNAcb1-3Galb1-4GlcNAcb1-3Galb1-4GlcNAcb1-6(Galb1-4GlcNAcb1-3Galb1-4GlcNAcb1-3Galb1-4GlcNAb1-2)Mana1-6(Galb1-4GlcNAcb1-3Galb1-4GlcNAcb1-3Galb1-4GlcNAcb1-2Mana1-3)Manb1-4GlcNAcb1-4(Fuca1-6)GlcNAcb-Sp24	130.207	0.8819	118.254	-1.39655	22.9119	9.95318	-47.4436	37.9045	35.0551	-10.4346	-2.67975	85.9059	-158.094	432.32	850.909	9.72087	-13.0438	-19.7047	2508.3	206.144	786.686	21.0338	28.1754	11.8432	6.38662	-34.5024	-24.8498	-8.14937	-4.65573	43205	25265.2	9043.89	170.284	-59.5607	-11.2374	-24.8896
586	GlcNAc ext 3 arms+F	GlcNAcb1-3Galb1-4GlcNAcb1-3Galb1-4GlcNAcb1-3Galb1-4GlcNAcb1-6(GlcNAcb1-3Galb1-4GlcNAcb1-3Galb1-4GlcNAcb1-3Galb1-4GlcNAb1-2)Mana1-6(GlcNAcb1-3Galb1-4GlcNAcb1-3Galb1-4GlcNAcb1-3Galb1-4GlcNAcb1-2Mana1-3)Manb1-4GlcNAcb1-4(Fuca1-6)GlcNAcb-Sp24	991.474	-98.4717	58.8797	-2.84375	-18.7802	23.2809	33134.5	15933.2	836.155	2.96045	29.6272	27.2199	-194.995	753.758	150.995	-5.7011	-2.55005	-22.7503	398.913	22.5688	307.227	14.6611	44.0739	34.4251	17.7368	854.216	29.9752	-16.2545	-2.8356	40.9906	58.9081	21.7539	-82.428	-104.813	-25.1357	-43.3309
587	LacNAc ext 3 arms+F	Galb1-4GlcNAcb1-3Galb1-4GlcNAcb1-3Galb1-4GlcNAcb1-3Galb1-4GlcNAcb1-6(Galb1-4GlcNAcb1-3Galb1-4GlcNAcb1-3Galb1-4GlcNAcb1-3Galb1-4GlcNAb1-2)Mana1-6(Galb1-4GlcNAcb1-3Galb1-4GlcNAcb1-3Galb1-4GlcNAcb1-3Galb1-4GlcNAcb1-2Mana1-3)Manb1-4GlcNAcb1-4(Fuca1-6)GlcNAcb-	76.4659	243.807	136.534	7.28713	-3.4434	4.0645	167.165	391.701	45.551	-4.86982	-10.8482	22.0698	-70.4601	117.094	145.386	-7.35537	-9.47147	-20.6762	3151.63	66.1639	385.301	0.86655	26.2903	19.3861	10.0464	-32.3563	-26.9054	-15.6903	-26.7053	40528.8	26147.3	9929.38	479.849	-59.4778	-22.3943	-16.5129
588	GlcNAc ext 3 arms+F	GlcNAcb1-3Galb1-4GlcNAcb1-3Galb1-4GlcNAcb1-3Galb1-4GlcNAcb1-3Galb1-4GlcNAcb1-6(GlcNAcb1-3Galb1-4GlcNAcb1-3Galb1-4GlcNAcb1-3Galb1-4GlcNAcb1-3Galb1-4GlcNAb1-2)Mana1-6(GlcNAcb1-3Galb1-4GlcNAcb1-3Galb1-4GlcNAcb1-3Galb1-4GlcNAcb1-3Galb1-4GlcNAcb1-2Mana1-3)Manb	213.876	151.35	126.617	0.5501	-2.74468	19.682	45402.6	12423.6	970.575	-7.76087	49.0097	16.5642	-83.5549	1475.42	1091.75	-7.60625	3.50167	-16.6141	-17.7971	-26.1946	-22.1043	65.85	75.0296	44.0912	18.352	1745.86	66.1186	-11.6327	-45.7	335.245	98.6626	61.6335	-64.2059	-112.391	-25.2561	-35.9903
589	LacNAc ext 3 arms+F	Galb1-4GlcNAcb1-3Galb1-4GlcNAcb1-3Galb1-4GlcNAcb1-3Galb1-4GlcNAcb1-3Galb1-4GlcNAcb1-6(Galb1-4GlcNAcb1-3Galb1-4GlcNAcb1-3Galb1-4GlcNAcb1-3Galb1-4GlcNAcb1-3Galb1-4GlcNAb1-2)Mana1-6(Galb1-4GlcNAcb1-3Galb1-4GlcNAcb1-3Galb1-4GlcNAcb1-3Galb1-4GlcNAcb1-3Galb1-4G	1136.3	735.539	159.124	5.78833	32.5662	-3.9418	198.426	351.281	36.3295	-8.14495	-5.239	11.7484	-58.2013	652.232	471.554	8.67555	-10.2768	-19.0944	3494.25	38.1988	13.2321	80.1317	79.9799	50.0343	18.4997	-33.7575	-43.2498	-12.257	-22.5096	42508.6	28948.8	6903.63	760.597	-50.9898	-29.181	-16.4403
590	LacNAc dimeric (core3)	Galb1-4GlcNAcb1-3Galb1-4GlcNAcb1-3GalNAca-Sp14	-143.976	-70.0165	162.578	14.7119	9.82822	73.9813	-8.63415	54.87	83.8992	25.2388	25.2385	89.2031	-123.904	249.865	1598.23	16.0424	60.2003	21.6662	146.635	123.184	76.9983	33.9718	52.0105	52.7105	59.3464	46.2449	17.6393	10.4358	2.9356	27453.7	5985.6	954.637	13.4433	-0.60485	-0.474375	31.9937
591	LacNAc dimeric (core 4)	Galb1-4GlcNAcb1-3Galb1-4GlcNAcb1-6(Galb1-3)GalNAca-Sp14	1.51697	26.6454	226.843	22.8469	27.1909	37.403	-30.2513	32.1132	142.602	-4.37995	30.282	77.4096	-80.1909	73.1291	1090.97	27.8509	34.5709	-10.3084	123.002	110.426	133.054	16.495	46.4386	36.7926	51.2688	332.528	84.5033	-0.8384	44.452	32460.3	9493.04	1323.6	4.23582	23.3153	29.3149	57.2694
592	LacNAcs (core4)	Galb1-4GlcNAcb1-3Galb1-4GlcNAcb1-6(Galb1-4GlcNAcb1-3Galb1-4GlcNAcb1-3)GalNAca-Sp14	-136.681	23.3633	275.777	34.1485	21.9815	72.6454	-16.2831	14.6918	124.09	17.2773	44.7165	103.263	-88.6239	399.818	1078.1	51.2629	46.3678	20.6844	124.683	218.564	217.949	36.8333	75.7251	96.7526	80.0998	15.5037	42.1692	37.6026	47.1098	31842.7	7838.47	1542.3	-13.2483	-16.5593	7.57845	58.4975
593	3'SLacNAc--	Neu5Aca2-3Galb1-4GlcNAcb1-3Galb1-4GlcNAcb1-3GalNAca-Sp14	-152.727	10.4002	-4.23622	-7.51585	-11.5192	-6.18222	-28.028	-25.0455	-4.5961	26.0687	1.40657	-0.7296	-127.996	204.327	185.379	-8.61187	-7.17825	-20.3578	4976.19	760.849	62.2624	-3.81245	2.30258	-0.837225	-0.3511	6.21917	-22.3725	-1.1976	-18.473	14.2663	13.4818	16.3937	-33.3701	-47.7238	-2.66318	-9.40995
594	GlcNAc (core 3)	GlcNAcb1-3Galb1-4GlcNAcb1-3GalNAca-Sp14	20.2775	-32.6045	-0.762325	-1.30455	-11.173	-0.863925	-83.6396	-33.1287	-15.3425	-16.3615	-17.1482	7.23118	9.29675	-115.833	237.151	-4.17155	-17.5571	-24.9759	4.70857	5.71325	20.9186	-4.89405	3.24895	2.4694	1.86838	-76.7181	-35.1582	-22.8078	-27.4012	3.03207	7.33715	5.09315	0.7008	-74.3868	-12.1168	-12.7461
595	GlcNAc (core 4)	GlcNAcb1-3Galb1-4GlcNAcb1-6(Galb1-3)GalNAca-Sp14	-62.3157	-73.9759	9.70172	-7.0469	-11.0481	-2.1313	-30.0912	-2.07965	-3.79012	-9.14975	-7.5999	4.98747	-124.29	-29.1273	69.4736	-4.63373	-12.1321	-32.0723	42.8756	0.209275	13.8558	-0.484525	1.6877	2.53987	10.9766	2559.32	240.598	-9.14647	-22.79	8.15555	22.1843	18.3185	-34.3991	-14.7349	-12.6658	-16.7136
596	GlcNAc (core 4)	GlcNAcb1-3Galb1-4GlcNAcb1-6(GlcNAcb1-3Galb1-4GlcNAcb1-3)GalNAca-Sp14	99.5483	-22.0342	20.7217	-5.03463	-6.68858	-3.18928	-53.1724	-20.0522	-21.8685	-14.5433	-11.66	10.0372	-192.143	-71.3255	210.642	-4.6283	-9.42545	-16.5992	7.72822	-0.698025	-9.28515	-5.93285	-3.84922	4.64105	15.3636	-12.3235	-56.2496	2.5941	-20.9631	60.8694	46.4176	18.6308	-55.4084	-32.8842	-18.0288	-16.0696
597	3'SLacNAc--	Neu5Aca2-3Galb1-4GlcNAcb1-3Galb1-4GlcNAcb1-6(Neu5Aca2-3Galb1-4GlcNAcb1-3Galb1-4GlcNAcb1-3)GalNAca-Sp14	-126.078	-3.1991	36.2269	16.3658	-4.21105	16.7438	8.8775	-18.4177	30.5176	5.97168	-5.3496	47.3488	-155.406	1122.04	283.103	0.303075	-2.85415	-18.2569	13514.2	3992.94	531.291	-2.84395	8.5896	24.8595	17.6468	-41.594	-16.391	1.4194	-12.2351	8999.42	2290.47	269.344	-26.5173	-4.32847	-0.0767	-4.767
598	6'SLacNAc (core 3)	Neu5Aca2-6Galb1-4GlcNAcb1-3Galb1-4GlcNAcb1-3GalNAca-Sp14	-137.086	-36.0807	15.7621	4.03897	-3.88265	-9.52003	-19.0138	-23.8719	-2.0927	-6.76157	-6.68923	-13.1228	51511.4	41726.4	37629.5	9891.21	9346.08	2269.2	18.5876	22.1098	25.8939	-14.0647	2.5279	3.03595	3.3464	-17.8064	-24.3629	-0.28435	-24.3564	21.0009	20.4663	9.86442	-35.1507	-56.7282	-10.317	-25.4341
599		GlcNAcb1-3Galb1-4GlcNAcb1-3Galb1-4GlcNAcb1-3GalNAca-Sp14	77.7812	-95.5232	-12.8181	-3.19045	-3.45168	-0.377375	-54.7569	-29.7513	-3.16587	-8.0943	-13.3987	-0.529175	-71.4605	274.456	96.3382	-5.1428	-6.77278	-18.9655	105.471	38.8516	201.394	-4.87082	0.837325	4.88442	-4.33148	-60.1172	22.2152	-10.3122	66.082	14.0448	2.51073	16.9612	-59.7065	-77.4226	-20.8822	-35.0156
600	LacNAc-core1	Galb1-4GlcNAcb1-3Galb1-3GalNAca-Sp14	-143.9	-18.9348	-6.322	-12.4443	-14.6086	0.801825	-33.9151	-18.3551	4.25512	-5.32975	-18.2887	-5.0793	-252.585	-138.556	72.0867	-5.52107	-1.40235	-34.4608	87.5968	24.9146	60.9541	-8.5358	3.7292	-0.09735	1.0236	-38.7224	-10.6023	-2.80832	-2.5683	22895.3	2757.36	544.451	-28.6522	-28.5991	-4.99345	-19.5068
601	3'SLacNAc--	Neu5Aca2-3Galb1-4GlcNAcb1-3Galb1-4GlcNAcb1-6(Galb1-3)GalNAca-Sp14	-107.647	-8.15263	73.0015	16.1111	23.422	21.679	-42.8332	-7.57935	68.2235	6.7091	8.0604	60.1624	-196.903	60.4172	323.373	11.7246	30.2745	-19.4278	5074.24	1047.69	223.352	-7.63698	13.9815	21.8679	20.5642	-27.1004	-1.40312	-0.984575	-16.3729	47.7417	52.6755	36.1799	-50.9141	-67.4982	4.6551	-7.88143
602	6'SLacNAc--	Neu5Aca2-6Galb1-4GlcNAcb1-3Galb1-4GlcNAcb1-6(Galb1-3)GalNAca-Sp14	424.154	-129.205	86.6892	3.54427	8.69053	24.2172	-63.4567	1.18588	42.2427	-5.7232	0.5823	41.3406	30399.2	23904.9	33938.5	9649.99	7806.14	2959.59	98.4923	-7.23823	52.8713	-7.51672	-0.334575	11.5155	6.0804	-55.549	-42.7046	-14.7348	-27.4947	120.823	47.3161	50.5362	-73.5892	-108.764	-17.8521	-54.4388
603	6'SLacNAc--	Neu5Aca2-6Galb1-4GlcNAcb1-6(Galb1-3)GalNAca-Sp14	11.3888	-45.3312	37.9042	6.30328	3.4175	-8.95545	-18.5053	0.8809	3.0367	-5.2487	-8.89815	33.1881	45088.7	20315.6	36014.9	9399.92	6775.95	2109.89	91.9822	7.82602	12.7081	-7.77022	3.25035	4.63925	6.79747	-20.7464	-12.672	-18.7732	-10.3329	101.764	46.3465	15.2724	-37.6425	-61.3554	-16.6903	-3.7148
604	3'SLacNAc --	Neu5Aca2-3Galb1-4GlcNAcb1-3Galb1-4GlcNAcb1-2Mana1-6(Neu5Aca2-3Galb1-4GlcNAcb1-3Galb1-4GlcNAcb1-2Mana1-3)Manb1-4GlcNAcb1-4GlcNAcb-Sp12	32657.5	11079.4	759.025	55.2775	83.8776	100.85	3.83993	69.7934	165.566	-0.641825	44.8089	147.33	-7.05345	105.971	1057.06	40.2205	69.0036	7.19148	5295.71	1072.52	181.726	66.5934	97.3048	94.4471	115.862	11.8816	76.2277	33.5766	46.3975	13378.3	2693.78	773.714	-7.26078	21.3396	1.68065	98.9365
605	3'S-core2	GlcNAcb1-6(Neu5Aca2-3Galb1-3)GalNAca-Sp14	-50.2904	-7.30098	12.2353	2.96955	0.226	-0.2824	-34.7447	-16.7894	-2.37742	-10.1367	-7.27315	4.77485	-68.1839	-77.7871	328.423	-4.0295	5.82737	-7.70835	3.7817	4.27755	14.6767	0.279375	10.3747	6.62447	0.934075	-27.1461	-29.6088	-7.1904	-9.28648	5.829	6.39805	7.52578	-28.9262	-44.6961	-1.73095	-9.1089
606	6'SLacNAc--	Neu5Aca2-6Galb1-4GlcNAcb1-3Galb1-4GlcNAcb1-6(Neu5Aca2-6Galb1-4GlcNAcb1-3Galb1-4GlcNAcb1-3)GalNAca-Sp14	-222.65	229.988	145.726	36.5708	15.0736	144.341	-4.12015	29.5787	182.48	3.82547	62.2976	182.369	39290.1	39924.9	32112	13405.5	5481.99	3931.92	206.336	281.931	259.255	87.7089	104.673	134.348	154.167	13.3181	24.5241	64.8493	26.6694	492.544	248.898	110.221	55.8709	12.03	22.1846	78.38
607	6'SLacNAc--	Neu5Aca2-6Galb1-4GlcNAcb1-3Galb1-4GlcNAcb1-3Galb1-4GlcNAcb1-2Mana1-6(Neu5Aca2-6Galb1-4GlcNAcb1-3Galb1-4GlcNAcb1-3Galb1-4GlcNAcb1-2Mana1-3)Manb1-4GlcNAcb1-4GlcNAcb-Sp12	26362.1	4338.59	512.603	39.7288	74.5072	71.2034	20.6503	69.715	124.844	15.4213	59.6993	102.264	41216.7	45011.4	35360.2	12053.3	7998.94	4480.12	285.803	131.274	177.958	66.6499	95.0867	99.6997	84.8389	8.8378	61.879	25.9297	34.6596	1121.44	320.913	44.9489	35.3413	60.6332	11.4939	56.6588
608	3'SLacNAc --	Neu5Aca2-3Galb1-4GlcNAcb1-3Galb1-4GlcNAcb1-3Galb1-4GlcNAcb1-2Mana1-6(Neu5Aca2-3Galb1-4GlcNAcb1-3Galb1-4GlcNAcb1-3Galb1-4GlcNAcb1-2Mana1-3)Manb1-4GlcNAcb1-4GlcNAcb-Sp12	1185.58	-65.5392	252.264	86.7678	68.1137	86.7899	-11.2856	112.525	106.11	24.4971	70.2682	53.2214	50.3844	-59.9834	523.89	31.6441	75.1944	73.3491	752.416	188.484	231.05	124.681	163.414	163.618	174.699	33.5299	85.1323	76.4068	76.4827	664.795	466.926	129.569	-30.3918	76.9871	19.192	127.217
609	6'SLacNAc--	Neu5Aca2-6Galb1-4GlcNAcb1-3Galb1-4GlcNAcb1-2Mana1-6(Neu5Aca2-6Galb1-4GlcNAcb1-3Galb1-4GlcNAcb1-2Mana1-3)Manb1-4GlcNAcb1-4GlcNAcb-Sp12	35619.2	22776.6	1153.28	12.4866	48.2938	46.3795	-43.1058	4.86973	70.3071	3.63323	-2.43262	57.3061	36651.9	39155.4	35573.6	12319.4	8524.94	4230.61	351.176	66.5124	223.979	27.6558	30.1053	17.8509	21.8001	-19.0931	-6.17115	0.49505	-4.82025	33319.5	18889.9	1846.98	-11.6717	-23.6567	-6.34383	-6.5987
610		GlcNAcb1-3Fuca-Sp21	-42.1478	-16.3926	37.6523	-7.56902	-7.08085	-14.923	2401.73	241.273	19.0701	-10.1927	-4.73727	4.0838	-219.647	-8.2185	109.247	-0.79245	-14.449	-23.872	-7.20357	-14.9643	14.3982	919.452	972.591	83.5727	8.54973	-32.4572	-28.8344	-10.8467	-31.9361	1574.07	6.89025	3.6114	-21.2392	-47.3887	-8.5634	-20.5906
611	GT1c	Galb1-3GalNAcb1-4(Neu5Aca2-8Neu5Aca2-8Neu5Aca2-3)Galb1-4Glcb-Sp21	-55.5745	7.7835	72.3157	17.1976	30.0032	21.8174	-3.30487	17.272	29.9182	20.2224	19.8002	18.8616	-135.645	140.663	182.936	34.4079	20.588	6.72028	52.9241	36.6387	44.8399	5.6684	23.6153	24.237	18.0779	15.3713	34.4444	13.2706	17.1052	9.90485	9.07368	13.1172	-10.4227	36.8408	27.8958	8.25192

## Sheet: CFG consistency
				Raw RFU, no floor							Floor = 100 and Log2							Differences
lectin	Chart Number	Abbreviation	Structure on Masterlist	100ug/mL	50ug/mL	10ug/mL	1ug/mL	0.5ug/mL	0.1ug/mL		100ug/mL	50ug/mL	10ug/mL	1ug/mL	0.5ug/mL	0.1ug/mL		100 v 50	50 v 10	10 v 1	1 v 0.5	0.5 v 0.1
ConA	84	2'F-A type 2	GalNAca1-3(Fuca1-2)Galb1-4(Fuca1-3)GlcNAcb-Sp0	-44.8918	-39.92	29.1918	3.43205	1.4216	33.4387		6.64386	6.64386	6.64386	6.64386	6.64386	6.64386		0	0	0	0	0
ConA	104	2'F-B type 2	Gala1-3(Fuca1-2)Galb1-4(Fuca1-3)GlcNAcb-Sp0	2.54818	97.7993	54.8644	4.47662	0.725225	35.5233		6.64386	6.64386	6.64386	6.64386	6.64386	6.64386		0	0	0	0	0
ConA	105	2'F-B type 2	Gala1-3(Fuca1-2)Galb1-4(Fuca1-3)GlcNAcb-Sp8	427.881	-45.7437	74.6757	-2.91585	-2.69715	6.58058		8.74107	6.64386	6.64386	6.64386	6.64386	6.64386		2.09721	0	0	0	0
ConA	78	2'FL (BG-H6)	Fuca1-2Galb1-4Glcb-Sp0	-42.7253	-6.107	81.5678	-5.19113	-0.153975	19.4104		6.64386	6.64386	6.64386	6.64386	6.64386	6.64386		0	0	0	0	0
ConA	514	3,3'-Di-Su-LDN	(3S)GalNAcb1-4(3S)GlcNAc-Sp8	-167.598	-142.906	42.9047	-15.1512	-6.8924	-5.1016		6.64386	6.64386	6.64386	6.64386	6.64386	6.64386		0	0	0	0	0
ConA	297	3',4'-di-Su-LacNAc	4S(3S)Galb1-4GlcNAcb-Sp0	-14.865	-13.1469	106.359	2.03025	4.93673	-2.3105		6.64386	6.64386	6.73279	6.64386	6.64386	6.64386		0	-0.0889374	0.0889374	0	0
ConA	245	3'6-diSialyl-TF	Neu5Aca2-6(Neu5Aca2-3Galb1-3)GalNAca-Sp14	2763.2	820.304	985.425	7.54852	2.68968	11.484		11.4321	9.68001	9.9446	6.64386	6.64386	6.64386		1.75211	-0.264588	3.30075	0	0
ConA	244	3'6-diSialyl-TF	Neu5Aca2-6(Neu5Aca2-3Galb1-3)GalNAca-Sp8	-24.5505	15.9958	17.9477	0.861025	1.809	-5.00357		6.64386	6.64386	6.64386	6.64386	6.64386	6.64386		0	0	0	0	0
ConA	185	3'GN-Di-LacNAc	GlcNAcb1-3Galb1-4GlcNAcb1-3Galb1-4GlcNAcb-Sp0	-19.4025	2.82468	0.372175	0.386225	-5.79873	12.056		6.64386	6.64386	6.64386	6.64386	6.64386	6.64386		0	0	0	0	0
ConA	359	3'KDN-Lac	KDNa2-3Galb1-4Glc-Sp0	-93.0746	-30.6022	80.6817	3.57795	-7.7514	29.6817		6.64386	6.64386	6.64386	6.64386	6.64386	6.64386		0	0	0	0	0
ConA	207	3'KDNLacNAc	KDNa2-3Galb1-4GlcNAcb-Sp0	-14.486	-37.4237	27.6368	9.53	9.41188	0.566		6.64386	6.64386	6.64386	6.64386	6.64386	6.64386		0	0	0	0	0
ConA	206	3'-KDNLec	KDNa2-3Galb1-3GlcNAcb-Sp0	-78.4525	78.5359	38.8102	-1.15715	-1.13835	4.44603		6.64386	6.64386	6.64386	6.64386	6.64386	6.64386		0	0	0	0	0
ConA	284	3'S(Gc)LacNAc	Neu5Gca2-3Galb1-4GlcNAcb-Sp0	-29.4316	0.5905	4.42185	-1.04443	1.21053	3.92515		6.64386	6.64386	6.64386	6.64386	6.64386	6.64386		0	0	0	0	0
ConA	544	3'S(Gc)LacNAc--	Neu5Gca2-3Galb1-4GlcNAcb1-3Galb1-4GlcNAcb1-2Mana1-6(Neu5Gca2-3Galb1-4GlcNAcb1-3Galb1-4GlcNAcb1-2Mana1-3)Manb1-4GlcNAcb1-4GlcNAcb-Sp24	35231.3	15409.5	889.289	10.8482	17.33	-5.93042		15.1046	13.9115	9.79651	6.64386	6.64386	6.64386		1.19303	4.11503	3.15265	0	0
ConA	282	3'S(Gc)LeC	Neu5Gca2-3Galb1-3GlcNAcb-Sp0	124.302	-19.7312	21.0625	-3.1418	-7.7655	1.62845		6.95771	6.64386	6.64386	6.64386	6.64386	6.64386		0.313849	0	0	0	0
ConA	605	3'S-core2	GlcNAcb1-6(Neu5Aca2-3Galb1-3)GalNAca-Sp14	-50.2904	-7.30098	12.2353	2.96955	0.226	-0.2824		6.64386	6.64386	6.64386	6.64386	6.64386	6.64386		0	0	0	0	0
ConA	262	3'S-Di-LacNAc	Neu5Aca2-3Galb1-4GlcNAcb1-3Galb1-4GlcNAcb-Sp0	331.016	-0.5583	7.07985	-8.71058	10.0155	4.79252		8.37076	6.64386	6.64386	6.64386	6.64386	6.64386		1.7269	0	0	0	0
ConA	237	3'SGalNAc	Neu5Aca2-3GalNAca-Sp8	-58.8733	8.74215	-12.9876	-14.699	-1.53705	-16.1175		6.64386	6.64386	6.64386	6.64386	6.64386	6.64386		0	0	0	0	0
ConA	260	3'SLacNAc	Neu5Aca2-3Galb1-4GlcNAcb-Sp0	-70.8088	21.4241	-11.6147	12.8941	5.31557	-7.97878		6.64386	6.64386	6.64386	6.64386	6.64386	6.64386		0	0	0	0	0
ConA	261	3'SLacNAc	Neu5Aca2-3Galb1-4GlcNAcb-Sp8	-51.5513	-20.8314	4.14182	1.42353	0.70845	-5.64162		6.64386	6.64386	6.64386	6.64386	6.64386	6.64386		0	0	0	0	0
ConA	593	3'SLacNAc--	Neu5Aca2-3Galb1-4GlcNAcb1-3Galb1-4GlcNAcb1-3GalNAca-Sp14	-152.727	10.4002	-4.23622	-7.51585	-11.5192	-6.18222		6.64386	6.64386	6.64386	6.64386	6.64386	6.64386		0	0	0	0	0
ConA	597	3'SLacNAc--	Neu5Aca2-3Galb1-4GlcNAcb1-3Galb1-4GlcNAcb1-6(Neu5Aca2-3Galb1-4GlcNAcb1-3Galb1-4GlcNAcb1-3)GalNAca-Sp14	-126.078	-3.1991	36.2269	16.3658	-4.21105	16.7438		6.64386	6.64386	6.64386	6.64386	6.64386	6.64386		0	0	0	0	0
ConA	601	3'SLacNAc--	Neu5Aca2-3Galb1-4GlcNAcb1-3Galb1-4GlcNAcb1-6(Galb1-3)GalNAca-Sp14	-107.647	-8.15263	73.0015	16.1111	23.422	21.679		6.64386	6.64386	6.64386	6.64386	6.64386	6.64386		0	0	0	0	0
ConA	480	3'SLacNAc--	Neu5Aca2-3Galb1-4GlcNAcb1-6GalNAca-Sp14	-142.826	-64.4822	-3.55898	-1.24548	-9.64947	-5.1832		6.64386	6.64386	6.64386	6.64386	6.64386	6.64386		0	0	0	0	0
ConA	472	3'SLacNAc--	Neu5Aca2-3Galb1-4GlcNAcb1-6(Neu5Aca2-3Galb1-4GlcNAcb1-3)GalNAca-Sp14	-67.9736	-64.6115	-1.24645	-4.99993	-6.46457	-7.42835		6.64386	6.64386	6.64386	6.64386	6.64386	6.64386		0	0	0	0	0
ConA	604	3'SLacNAc --	Neu5Aca2-3Galb1-4GlcNAcb1-3Galb1-4GlcNAcb1-2Mana1-6(Neu5Aca2-3Galb1-4GlcNAcb1-3Galb1-4GlcNAcb1-2Mana1-3)Manb1-4GlcNAcb1-4GlcNAcb-Sp12	32657.5	11079.4	759.025	55.2775	83.8776	100.85		14.9951	13.4356	9.568	6.64386	6.64386	6.65607		1.55953	3.86759	2.92415	0	-0.0122139
ConA	378	3'SLacNAc --	Neu5Aca2-6Galb1-4GlcNAcb1-3GalNAc-Sp14	194.491	132.513	67.7153	-7.52937	-5.97067	3.31352		7.60356	7.04999	6.64386	6.64386	6.64386	6.64386		0.553576	0.40613	0	0	0
ConA	481	3'SLacNAc --	Neu5Aca2-6Galb1-4GlcNAcb1-6GalNAca-Sp14	-58.242	-19.4106	109.412	1.22668	-1.67188	15.0403		6.64386	6.64386	6.77363	6.64386	6.64386	6.64386		0	-0.129772	0.129772	0	0
ConA	377	3'SLacNAc --	Neu5Aca2-3Galb1-4GlcNAcb1-3GalNAc-Sp14	-72.0383	-56.1805	-11.2715	-11.7135	1.15747	-0.962675		6.64386	6.64386	6.64386	6.64386	6.64386	6.64386		0	0	0	0	0
ConA	608	3'SLacNAc --	Neu5Aca2-3Galb1-4GlcNAcb1-3Galb1-4GlcNAcb1-3Galb1-4GlcNAcb1-2Mana1-6(Neu5Aca2-3Galb1-4GlcNAcb1-3Galb1-4GlcNAcb1-3Galb1-4GlcNAcb1-2Mana1-3)Manb1-4GlcNAcb1-4GlcNAcb-Sp12	1185.58	-65.5392	252.264	86.7678	68.1137	86.7899		10.2114	6.64386	7.97879	6.64386	6.64386	6.64386		3.56753	-1.33494	1.33494	0	0
ConA	479	3'SLacNAc --	Neu5Aca2-3Galb1-4GlcNAcb1-2Mana-Sp0	-135.735	-86.2041	615.859	-7.4862	-10.0052	18.825		6.64386	6.64386	9.26646	6.64386	6.64386	6.64386		0	-2.6226	2.6226	0	0
ConA	252	3'SLacNAc(6Su)	Neu5Aca2-3Galb1-4(6S)GlcNAcb-Sp8	18.6965	-62.8145	-13.5486	-0.2267	11.6123	-6.08867		6.64386	6.64386	6.64386	6.64386	6.64386	6.64386		0	0	0	0	0
ConA	46	3'SLacNAc(6'Su)	Neu5Aca2-3(6S)Galb1-4GlcNAcb-Sp8	-10.3523	22.0519	3.81267	-5.09875	-2.8816	-3.00685		6.64386	6.64386	6.64386	6.64386	6.64386	6.64386		0	0	0	0	0
ConA	296	3'SLacNAc-LeC	Neu5Aca2-3Galb1-4GlcNAcb1-3Galb1-3GlcNAcb-Sp0	86.5994	-22.6034	1.4826	-1.38743	1.0357	11.7344		6.64386	6.64386	6.64386	6.64386	6.64386	6.64386		0	0	0	0	0
ConA	219	3'SLacNAc-LeX	Neu5Aca2-3Galb1-4GlcNAcb1-3Galb1-4(Fuca1-3)GlcNAcb-Sp0	-88.6603	-38.5941	3.32395	-6.9632	-13.9388	-1.15075		6.64386	6.64386	6.64386	6.64386	6.64386	6.64386		0	0	0	0	0
ConA	238	3'SLDN	Neu5Aca2-3GalNAcb1-4GlcNAcb-Sp0	-97.1894	-34.9595	-4.98713	-1.08455	-3.43998	1.8273		6.64386	6.64386	6.64386	6.64386	6.64386	6.64386		0	0	0	0	0
ConA	250	3'SLeC	Neu5Aca2-3Galb1-3GlcNAcb-Sp0	-32.1711	-4.56802	-1.95242	6.31135	15.8488	-2.42007		6.64386	6.64386	6.64386	6.64386	6.64386	6.64386		0	0	0	0	0
ConA	251	3'SLeC	Neu5Aca2-3Galb1-3GlcNAcb-Sp8	-45.8685	-9.70575	6.78647	-0.22205	0.508225	-6.16067		6.64386	6.64386	6.64386	6.64386	6.64386	6.64386		0	0	0	0	0
ConA	527	3'SLeC--	Neu5Aca2-3Galb1-3GlcNAcb1-2Mana-Sp0	19479.1	5897.37	943.201	8.8873	-3.0726	17.3879		14.2496	12.5259	9.88142	6.64386	6.64386	6.64386		1.72378	2.64444	3.23756	0	0
ConA	487	3'SLeC--	Neu5Aca2-3Galb1-3GlcNAcb1-2Mana1-6(GlcNAcb1-4)(Neu5Aca2-3Galb1-3GlcNAcb1-2Mana1-3)Manb1-4GlcNAcb1-4GlcNAc-Sp21	1803.82	1139.55	53.9797	1.85862	5.00137	12.9691		10.8168	10.1542	6.64386	6.64386	6.64386	6.64386		0.662596	3.51039	0	0	0
ConA	475	3'SLeC--	Neu5Aca2-3Galb1-3GlcNAcb1-6(Neu5Aca2-3Galb1-4GlcNAcb1-2)Mana1-6(Neu5Aca2-3Galb1-3GlcNAcb1-2Mana1-3)Manb1-4GlcNAcb1-4GlcNAcb-Sp19	4850.87	665.765	655.81	6.54668	-2.03647	-5.33835		12.244	9.37887	9.35713	6.64386	6.64386	6.64386		2.86516	0.0217362	2.71328	0	0
ConA	530	3'SLeC--	Neu5Aca2-3Galb1-3GlcNAcb1-4Galb1-4Glcb-Sp0	63.9752	90.0556	115.162	1.84797	-4.26067	0.7039		6.64386	6.64386	6.84752	6.64386	6.64386	6.64386		0	-0.203668	0.203668	0	0
ConA	400	3'SLeC--	Neu5Aca2-3Galb1-3GlcNAcb1-3GalNAca-Sp14	232.802	-26.1663	24.3813	-1.00462	-5.31918	1.81418		7.86296	6.64386	6.64386	6.64386	6.64386	6.64386		1.2191	0	0	0	0
ConA	492	3'SLeC--	Neu5Aca2-3Galb1-3GlcNAcb1-6GalNAca-Sp14	-85.7988	-27.3839	-3.911	-8.54805	-9.88737	-5.5012		6.64386	6.64386	6.64386	6.64386	6.64386	6.64386		0	0	0	0	0
ConA	239	3'SLeC(6Su)	Neu5Aca2-3Galb1-3(6S)GlcNAc-Sp8	118.602	-10.0811	20.5849	22.8098	4.19808	12.4851		6.88998	6.64386	6.64386	6.64386	6.64386	6.64386		0.246126	0	0	0	0
ConA	295	3'SLeC-LeC	Neu5Aca2-3Galb1-3GlcNAcb1-3Galb1-3GlcNAcb-Sp0	311.451	18.8473	20.8829	-0.226875	6.69728	4.94195		8.28286	6.64386	6.64386	6.64386	6.64386	6.64386		1.639	0	0	0	0
ConA	224	3'STF	Neu5Aca2-3Galb1-3GalNAca-Sp8	-50.6319	-43.4611	-6.28795	1.02872	-5.35987	-0.753225		6.64386	6.64386	6.64386	6.64386	6.64386	6.64386		0	0	0	0	0
ConA	225	3'STF	Neu5Aca2-3Galb1-3GalNAca-Sp14	-48.7594	-63.6984	0.6654	-2.5372	-5.09583	-4.33392		6.64386	6.64386	6.64386	6.64386	6.64386	6.64386		0	0	0	0	0
ConA	243	3'STF(6Su)	Neu5Aca2-3Galb1-3(6S)GalNAca-Sp8	682.29	-16.892	34.075	-1.79935	9.70007	-2.366		9.41424	6.64386	6.64386	6.64386	6.64386	6.64386		2.77039	0	0	0	0
ConA	259	3'S-Tri-LacNAc	Neu5Aca2-3Galb1-4GlcNAcb1-3Galb1-4GlcNAcb1-3Galb1-4GlcNAcb-Sp0	660.335	129.183	55.0851	-4.45555	-3.30888	-0.656725		9.36705	7.01327	6.64386	6.64386	6.64386	6.64386		2.35378	0.369414	0	0	0
ConA	85	3'Su-FL	(3S)Galb1-4(Fuca1-3)Glcb-Sp0	-15.4258	-13.4823	25.0007	7.71323	-3.18407	9.30355		6.64386	6.64386	6.64386	6.64386	6.64386	6.64386		0	0	0	0	0
ConA	516	3'Su-LDN	(3S)GalNAcb1-4GlcNAc-Sp8	-82.7333	-25.8754	15.9726	-20.5866	-12.6565	-14.7468		6.64386	6.64386	6.64386	6.64386	6.64386	6.64386		0	0	0	0	0
ConA	493	3'Su-LeA	(3S)Galb1-3(Fuca1-4)GlcNAcb-Sp0	-133.384	-45.103	22.7925	-4.5436	-0.80375	0.784275		6.64386	6.64386	6.64386	6.64386	6.64386	6.64386		0	0	0	0	0
ConA	33	3'-sulpho-LeX	(3S)Galb1-4(Fuca1-3)GlcNAc-Sp8	-26.9436	28.8116	-13.0536	-7.5524	3.4461	-1.03493		6.64386	6.64386	6.64386	6.64386	6.64386	6.64386		0	0	0	0	0
ConA	32	3'-sulpho-LeX	(3S)Galb1-4(Fuca1-3)GlcNAc-Sp0	-10.8495	-27.4942	18.219	6.21947	-1.50222	2.61153		6.64386	6.64386	6.64386	6.64386	6.64386	6.64386		0	0	0	0	0
ConA	298	4,6'-di-Su-LacNAc	(6S)Galb1-4(6S)GlcNAcb-Sp0	83.504	-31.7695	3.9937	-2.85315	6.56872	-14.4089		6.64386	6.64386	6.64386	6.64386	6.64386	6.64386		0	0	0	0	0
ConA	512	4',6'-Di-Su-LDN	(6S)(4S)GalNAcb1-4GlcNAc-Sp8	-83.7257	-18.4403	-5.23158	-0.675325	-8.37845	-22.8959		6.64386	6.64386	6.64386	6.64386	6.64386	6.64386		0	0	0	0	0
ConA	517	4'Su-GalNAc-b	(4S)GalNacb-Sp10	-205.812	-138.053	-13.5742	-19.4021	-7.28533	-10.2671		6.64386	6.64386	6.64386	6.64386	6.64386	6.64386		0	0	0	0	0
ConA	358	6'KDN-LacNAc	KDNa2-6Galb1-4GlcNAc-Sp0	-171.145	-109.316	3.8801	-14.4026	-13.6257	0.045625		6.64386	6.64386	6.64386	6.64386	6.64386	6.64386		0	0	0	0	0
ConA	518	6P-LacNAc	Galb1-4(6P)GlcNAcb-Sp0	-138.879	-43.9044	6.62542	3.45863	-7.89378	17.6002		6.64386	6.64386	6.64386	6.64386	6.64386	6.64386		0	0	0	0	0
ConA	519	6'P-LacNAc	(6P)Galb1-4GlcNAcb-SP0	-36.1037	-66.6821	-50.6535	-8.87562	-5.31353	-27.3983		6.64386	6.64386	6.64386	6.64386	6.64386	6.64386		0	0	0	0	0
ConA	324	6'S(Gc)b2-6LacNAc	Neu5Gcb2-6Galb1-4GlcNAc-Sp8	68.5722	-22.569	6.15203	12.6505	3.45555	19.7437		6.64386	6.64386	6.64386	6.64386	6.64386	6.64386		0	0	0	0	0
ConA	287	6'S(Gc)LacNAc	Neu5Gca2-6Galb1-4GlcNAcb-Sp0	-112.173	34.5454	2.26845	2.18463	7.34095	-0.887975		6.64386	6.64386	6.64386	6.64386	6.64386	6.64386		0	0	0	0	0
ConA	503	6'S-6Su-LDN	Neu5Aca2-6GalNAcb1-4(6S)GlcNAcb-Sp8	-162.188	-64.499	1.44807	-15.3952	-11.3787	-6.44235		6.64386	6.64386	6.64386	6.64386	6.64386	6.64386		0	0	0	0	0
ConA	272	6'S-Di-LacNAc	Neu5Aca2-6Galb1-4GlcNAcb1-3Galb1-4GlcNAcb-Sp0	8.71198	4.74735	-1.17347	10.7826	7.26437	-11.2854		6.64386	6.64386	6.64386	6.64386	6.64386	6.64386		0	0	0	0	0
ConA	266	6'SGalNAc	Neu5Aca2-6GalNAca-Sp8	436.906	-6.31085	6.18703	3.96185	-3.96283	-0.969275		8.77118	6.64386	6.64386	6.64386	6.64386	6.64386		2.12732	0	0	0	0
ConA	274	6'SLac	Neu5Aca2-6Galb1-4Glcb-Sp8	-31.3025	28.0502	27.9877	12.8095	3.03703	8.87402		6.64386	6.64386	6.64386	6.64386	6.64386	6.64386		0	0	0	0	0
ConA	273	6'SLac	Neu5Aca2-6Galb1-4Glcb-Sp0	-18.6324	-11.4793	6.87045	1.18533	0.627575	-10.3967		6.64386	6.64386	6.64386	6.64386	6.64386	6.64386		0	0	0	0	0
ConA	270	6'SLacNAc	Neu5Aca2-6Galb1-4GlcNAcb-Sp8	118.191	75.8807	12.7279	7.64018	-4.27025	0.7139		6.88498	6.64386	6.64386	6.64386	6.64386	6.64386		0.241123	0	0	0	0
ConA	269	6'SLacNAc	Neu5Aca2-6Galb1-4GlcNAcb-Sp0	9.17648	-15.9431	17.8426	5.28868	-7.7518	2.68428		6.64386	6.64386	6.64386	6.64386	6.64386	6.64386		0	0	0	0	0
ConA	609	6'SLacNAc--	Neu5Aca2-6Galb1-4GlcNAcb1-3Galb1-4GlcNAcb1-2Mana1-6(Neu5Aca2-6Galb1-4GlcNAcb1-3Galb1-4GlcNAcb1-2Mana1-3)Manb1-4GlcNAcb1-4GlcNAcb-Sp12	35619.2	22776.6	1153.28	12.4866	48.2938	46.3795		15.1204	14.4753	10.1715	6.64386	6.64386	6.64386		0.645102	4.30374	3.52767	0	0
ConA	607	6'SLacNAc--	Neu5Aca2-6Galb1-4GlcNAcb1-3Galb1-4GlcNAcb1-3Galb1-4GlcNAcb1-2Mana1-6(Neu5Aca2-6Galb1-4GlcNAcb1-3Galb1-4GlcNAcb1-3Galb1-4GlcNAcb1-2Mana1-3)Manb1-4GlcNAcb1-4GlcNAcb-Sp12	26362.1	4338.59	512.603	39.7288	74.5072	71.2034		14.6862	12.083	9.0017	6.64386	6.64386	6.64386		2.60317	3.08131	2.35784	0	0
ConA	606	6'SLacNAc--	Neu5Aca2-6Galb1-4GlcNAcb1-3Galb1-4GlcNAcb1-6(Neu5Aca2-6Galb1-4GlcNAcb1-3Galb1-4GlcNAcb1-3)GalNAca-Sp14	-222.65	229.988	145.726	36.5708	15.0736	144.341		6.64386	7.84541	7.18711	6.64386	6.64386	7.17334		-1.20156	0.6583	0.543256	0	-0.52948
ConA	521	6'SLacNAc--	Neu5Aca2-6Galb1-4GlcNAcb1-2Man-Sp0	-14.7402	-8.23287	12.8412	6.34705	-7.32558	2.55138		6.64386	6.64386	6.64386	6.64386	6.64386	6.64386		0	0	0	0	0
ConA	603	6'SLacNAc--	Neu5Aca2-6Galb1-4GlcNAcb1-6(Galb1-3)GalNAca-Sp14	11.3888	-45.3312	37.9042	6.30328	3.4175	-8.95545		6.64386	6.64386	6.64386	6.64386	6.64386	6.64386		0	0	0	0	0
ConA	602	6'SLacNAc--	Neu5Aca2-6Galb1-4GlcNAcb1-3Galb1-4GlcNAcb1-6(Galb1-3)GalNAca-Sp14	424.154	-129.205	86.6892	3.54427	8.69053	24.2172		8.72844	6.64386	6.64386	6.64386	6.64386	6.64386		2.08459	0	0	0	0
ConA	482	6'SLacNAc --	Neu5Aca2-6Galb1-4 GlcNAcb1-6(Neu5Aca2-6Galb1-4GlcNAcb1-3)GalNAca-Sp14	220.946	-67.6318	55.9829	0.190025	1.6918	-1.83405		7.78755	6.64386	6.64386	6.64386	6.64386	6.64386		1.1437	0	0	0	0
ConA	598	6'SLacNAc (core 3)	Neu5Aca2-6Galb1-4GlcNAcb1-3Galb1-4GlcNAcb1-3GalNAca-Sp14	-137.086	-36.0807	15.7621	4.03897	-3.88265	-9.52003		6.64386	6.64386	6.64386	6.64386	6.64386	6.64386		0	0	0	0	0
ConA	478	6'SLacNAc/LeC	Neu5Aca2-6Galb1-4GlcNAcb1-6(Galb1-3GlcNAcb1-3)Galb1-4Glcb-Sp21	-13.5122	-24.9209	-0.029275	-13.3567	0.18285	-1.96287		6.64386	6.64386	6.64386	6.64386	6.64386	6.64386		0	0	0	0	0
ConA	488	6'SLacNAc/LeY	Neu5Aca2-6Galb1-4GlcNAcb1-6(Fuca1-2Galb1-4(Fuca1-3)GlcNAcb1-3)Galb1-4Glc-Sp21	-81.1109	-41.6488	-1.4506	-4.36585	-10.0571	-1.98995		6.64386	6.64386	6.64386	6.64386	6.64386	6.64386		0	0	0	0	0
ConA	331	6'SLacNAc-LeC	Neu5Aca2-6Galb1-4GlcNAcb1-3Galb1-3GlcNAcb-Sp0	-159.682	-65.1521	-28.111	-4.20218	22.3936	-2.74068		6.64386	6.64386	6.64386	6.64386	6.64386	6.64386		0	0	0	0	0
ConA	271	6'SLacNAc-LeX-LeX	Neu5Aca2-6Galb1-4GlcNAcb1-3Galb1-4(Fuca1-3)GlcNAcb1-3Galb1-4(Fuca1-3)GlcNAcb-Sp0	882.369	742.251	75.7595	7.02542	19.2021	15.0173		9.78524	9.53576	6.64386	6.64386	6.64386	6.64386		0.249476	2.89191	0	0	0
ConA	267	6'SLDN	Neu5Aca2-6GalNAcb1-4GlcNAcb-Sp0	64.5004	-10.4075	1.97707	15.364	6.459	5.14973		6.64386	6.64386	6.64386	6.64386	6.64386	6.64386		0	0	0	0	0
ConA	137	6STF	Neu5Aca2-6(Galb1-3)GalNAca-Sp14	25.8415	53.3223	29.5723	-2.34347	5.79948	3.82478		6.64386	6.64386	6.64386	6.64386	6.64386	6.64386		0	0	0	0	0
ConA	138	6STF	Neu5Acb2-6(Galb1-3)GalNAca-Sp8	264.603	-13.2294	10.4801	1.83223	-3.2449	8.1871		8.04769	6.64386	6.64386	6.64386	6.64386	6.64386		1.40383	0	0	0	0
ConA	136	6STF	Neu5Aca2-6(Galb1-3)GalNAca-Sp8	-10.5558	-18.2575	35.1345	-1.63387	-3.49683	-6.14423		6.64386	6.64386	6.64386	6.64386	6.64386	6.64386		0	0	0	0	0
ConA	333	6'S-Tri-LacNAc	Neu5Aca2-6Galb1-4GlcNAcb1-3Galb1-4GlcNAcb1-3Galb1-4GlcNAcb-Sp0	-103.647	-38.6162	-6.5928	-8.19642	10.3122	-7.15475		6.64386	6.64386	6.64386	6.64386	6.64386	6.64386		0	0	0	0	0
ConA	292	6-su-3-FL	Galb1-4(Fuca1-3)(6S)Glcb-Sp0	-68.9835	17.7474	55.0496	24.1257	5.76535	20.4839		6.64386	6.64386	6.64386	6.64386	6.64386	6.64386		0	0	0	0	0
ConA	498	6'Su-BG-H1	Fuca1-2(6S)Galb1-3GlcNAcb-Sp0	-87.1271	-43.4965	9.63125	-18.3326	-26.7674	-10.0328		6.64386	6.64386	6.64386	6.64386	6.64386	6.64386		0	0	0	0	0
ConA	511	6Su-LacNAc	Galb1-3(6S)GlcNAcb-Sp8	0.305125	-30.4365	72.2667	-1.4416	-7.60032	-6.04673		6.64386	6.64386	6.64386	6.64386	6.64386	6.64386		0	0	0	0	0
ConA	515	6Su-LDN	GalNAcb1-4(6S)GlcNAc-Sp8	-35.2942	-69.3412	-18.9705	-25.1652	-18.4926	-21.3546		6.64386	6.64386	6.64386	6.64386	6.64386	6.64386		0	0	0	0	0
ConA	513	6'Su-LDN	(6S)GalNAcb1-4GlcNAc-Sp8	-109.684	-81.794	56.838	3.70408	-7.8768	-13.1373		6.64386	6.64386	6.64386	6.64386	6.64386	6.64386		0	0	0	0	0
ConA	444	6'Su-LeC	(6S)Galb1-3GlcNAcb-Sp0	-43.9096	-79.4296	-22.8893	-13.9892	-8.6218	-24.3235		6.64386	6.64386	6.64386	6.64386	6.64386	6.64386		0	0	0	0	0
ConA	291	6-su-LeX	Galb1-4(Fuca1-3)(6S)GlcNAcb-Sp0	-18.0712	-80.3441	120.839	11.8525	-6.23473	-0.214575		6.64386	6.64386	6.91694	6.64386	6.64386	6.64386		0	-0.273083	0.273083	0	0
ConA	329	9OAc3'SLacNAc	Neu5,9Ac2a2-3Galb1-4GlcNAcb-Sp0	-116.751	-24.3394	6.3772	10.711	21.0529	0.7957		6.64386	6.64386	6.64386	6.64386	6.64386	6.64386		0	0	0	0	0
ConA	330	9OAc3'SLeC	Neu5,9Ac2a2-3Galb1-4GlcNAcb-Sp0	133.419	-19.1374	30.7468	0.27295	5.72728	4.5406		7.05982	6.64386	6.64386	6.64386	6.64386	6.64386		0.415961	0	0	0	0
ConA	347	A1?	Mana1-6(Neu5Aca2-6Galb1-4GlcNAcb1-2Mana1-3)Manb1-4GlcNAcb1-4GlcNAc-Sp12	35812.9	35347.2	23160.6	909.263	1750.88	85.4534		15.1282	15.1093	14.4994	9.82855	10.7739	6.64386		0.0188818	0.609926	4.67083	-0.945313	4.13001
ConA	346	A1?	Neu5Aca2-6Galb1-4GlcNAcb1-2Mana1-6(Mana1-3)Manb1-4GlcNAcb1-4GlcNAc-Sp12	58407.5	32341.9	6259.16	100.509	143.469	6.1995		15.8339	14.9811	12.6118	6.65119	7.16459	6.64386		0.852749	2.36936	5.96057	-0.513409	0.520738
ConA	349	A1?	Neu5Aca2-6Galb1-4GlcNAcb1-2Mana1-3Manb1-4GlcNAcb1-4GlcNAc-Sp12	48.5553	17.0931	22.6873	3.77358	3.6465	7.35183		6.64386	6.64386	6.64386	6.64386	6.64386	6.64386		0	0	0	0	0
ConA	348	A1?	Neu5Aca2-6Galb1-4GlcNAcb1-2Mana1-6Manb1-4GlcNAcb1-4GlcNAc-Sp12	44.164	2.13268	62.9441	2.37473	-2.40355	6.61922		6.64386	6.64386	6.64386	6.64386	6.64386	6.64386		0	0	0	0	0
ConA	309	A1B	Neu5Aca2-6Galb1-4GlcNAcb1-2Mana1-6(GlcNAcb1-2Mana1-3)Manb1-4GlcNAcb1-4GlcNAcb-Sp12	41526.1	48019.5	5927.14	158.177	67.0247	4.54925		15.3417	15.5513	12.5331	7.3054	6.64386	6.64386		-0.209604	3.01821	5.22772	0.661543	0
ConA	320	A1-sp12	Galb1-4GlcNAcb1-2Mana1-6(Neu5Aca2-6Galb1-4GlcNAcb1-2Mana1-3)Manb1-4GlcNAcb1-4GlcNAcb-Sp12	42598.2	46131.5	2527.04	21.7744	26.9781	11.5486		15.3785	15.4935	11.3032	6.64386	6.64386	6.64386		-0.114959	4.19023	4.65938	0	0
ConA	302	A1-sp12	Neu5Aca2-6Galb1-4GlcNAcb1-2Mana1-6(Galb1-4GlcNAcb1-2Mana1-3)Manb1-4GlcNAcb1-4GlcNAcb-Sp12	41957.8	39173.1	2090.88	15.4072	31.0202	-5.30542		15.3567	15.2576	11.0299	6.64386	6.64386	6.64386		0.0990747	4.22768	4.38604	0	0
ConA	397	A2	Neu5Aca2-3Galb1-3GlcNAcb1-2Mana1-6(Neu5Aca2-3Galb1-3GlcNAcb1-2Mana1-3)Manb1-4GlcNAcb1-4GlcNAc-Sp19	6530.6	3710.8	1054.54	13.3027	27.3927	-22.237		12.673	11.8575	10.0424	6.64386	6.64386	6.64386		0.815485	1.81512	3.39854	0	0
ConA	326	A2-(a2-3)-sp12	Neu5Aca2-3Galb1-4GlcNAcb1-2Mana1-6(Neu5Aca2-3Galb1-4GlcNAcb1-2Mana1-3)Manb1-4GlcNAcb1-4GlcNAcb-Sp12	42290.7	34480	1648.74	27.6688	32.1153	13.1634		15.3681	15.0735	10.6872	6.64386	6.64386	6.64386		0.294581	4.38632	4.0433	0	0
ConA	55	A2-(a2-6)-sp12	Neu5Aca2-6Galb1-4GlcNAcb1-2Mana1-6(Neu5Aca2-6Galb1-4GlcNAcb1-2Mana1-3)Manb1-4GlcNAcb1-4GlcNAcb-Sp12	61880.1	41415.7	3089.26	20.2366	20.5896	-1.4583		15.9172	15.3379	11.593	6.64386	6.64386	6.64386		0.579299	3.74484	4.94919	0	0
ConA	327	A2-(a2-6)-sp12	Neu5Aca2-3Galb1-4GlcNAcb1-2Mana1-6(Neu5Aca2-6Galb1-4GlcNAcb1-2Mana1-3)Manb1-4GlcNAcb1-4GlcNAcb-Sp12	48590.3	33183.5	3714.89	-0.975825	1.8256	4.36548		15.5684	15.0182	11.8591	6.64386	6.64386	6.64386		0.550204	3.15908	5.21525	0	0
ConA	56	A2-(a2-6)-sp13	Neu5Aca2-6Galb1-4GlcNAcb1-2Mana1-6(Neu5Aca2-6Galb1-4GlcNAcb1-2Mana1-3)Manb1-4GlcNAcb1-4GlcNAcb-Sp13	52132.5	32867.1	4942.1	108.522	3.00995	-1.80288		15.6699	15.0044	12.2709	6.76185	6.64386	6.64386		0.665537	2.73345	5.50906	0.117994	0
ConA	57	A2-(a2-6)-sp21	Neu5Aca2-6Galb1-4GlcNAcb1-2Mana1-6(Neu5Aca2-6Galb1-4GlcNAcb1-2Man-a1-3)Manb1-4GlcNAcb1-4GlcNAcb-Sp21	38424.5	38630.9	4795.33	100.894	50.526	10.6847		15.2297	15.2375	12.2274	6.65669	6.64386	6.64386		-0.00772784	3.01005	5.57072	0.0128386	0
ConA	58	A2-(a2-6)-sp24	Neu5Aca2-6Galb1-4GlcNAcb1-2Mana1-6(Neu5Aca2-6Galb1-4GlcNAcb1-2Mana1-3)Manb1-4GlcNAcb1-4GlcNAcb-Sp24	43022.2	21011.7	3313	64.81	45.4477	6.93995		15.3928	14.3589	11.6939	6.64386	6.64386	6.64386		1.03389	2.66499	5.05006	0	0
ConA	460	A2B	Neu5Aca2-3Galb1-4GlcNAcb1-2Mana1-6(GlcNAcb1-4)(Neu5Aca2-3Galb1-4GlcNAcb1-2Mana1-3)Manb1-4GlcNAcb1-4GlcNAcb-Sp21	5366.47	1553.18	143.148	-3.57948	-4.53617	-1.35127		12.3898	10.601	7.16137	6.64386	6.64386	6.64386		1.78875	3.43964	0.517512	0	0
ConA	464	A2B	Neu5Aca2-6Galb1-4GlcNAcb1-2Mana1-6(GlcNAcb1-4)(Neu5Aca2-6Galb1-4GlcNAcb1-2Mana1-3)Manb1-4GlcNAcb1-4GlcNAcb-Sp21	564.624	-19.6267	43.929	-8.0157	-5.33462	9.6995		9.14115	6.64386	6.64386	6.64386	6.64386	6.64386		2.49729	0	0	0	0
ConA	483	A2F	Neu5Aca2-6Galb1-4GlcNAcb1-2Mana1-6(Neu5Aca2-6Galb1-4GlcNAcb1-2Mana1-3)Manb1-4GlcNAcb1-4(Fuca1-6)GlcNAcb-Sp24	41391.7	32857.6	2110.82	46.6299	11.3195	6.24395		15.3371	15.0039	11.0436	6.64386	6.64386	6.64386		0.333114	3.96035	4.39973	0	0
ConA	484	A2F	Neu5Aca2-3Galb1-4GlcNAcb1-2Mana1-6(Neu5Aca2-3Galb1-4GlcNAcb1-2Mana1-3)Manb1-4GlcNAcb1-4(Fuca1-6)GlcNAcb-Sp24	34862.5	22065.7	1690.34	16.3073	-8.68068	-3.27647		15.0894	14.4295	10.7231	6.64386	6.64386	6.64386		0.659875	3.70642	4.07924	0	0
ConA	319	A2-sp12	Neu5Aca2-6Galb1-4GlcNAcb1-2Mana1-6(Neu5Aca2-3Galb1-4GlcNAcb1-2Mana1-3)Manb1-4GlcNAcb1-4GlcNAcb-Sp12	45596.7	31761.3	1279.23	12.4293	22.2543	10.1425		15.4766	14.955	10.3211	6.64386	6.64386	6.64386		0.521661	4.63392	3.67721	0	0
ConA	465	A3B	Neu5Aca2-6Galb1-4GlcNAcb1-4Mana1-6(GlcNAcb1-4)(Neu5Aca2-6Galb1-4GlcNAcb1-4(Neu5Aca2-6Galb1-4GlcNAcb1-2)Mana1-3)Manb1-4GlcNAcb1-4GlcNAcb-Sp21	-124.802	27.1656	20.3334	-2.92582	-9.4503	1.62982		6.64386	6.64386	6.64386	6.64386	6.64386	6.64386		0	0	0	0	0
ConA	461	A3B	Neu5Aca2-3Galb1-4GlcNAcb1-4Mana1-6(GlcNAcb1-4)(Neu5Aca2-3Galb1-4GlcNAcb1-4(Neu5Aca2-3Galb1-4GlcNAcb1-2)Mana1-3)Manb1-4GlcNAcb1-4GlcNAcb-Sp21	15.1277	-28.1091	18.8538	18.6848	-7.1272	-4.98755		6.64386	6.64386	6.64386	6.64386	6.64386	6.64386		0	0	0	0	0
ConA	462	A3B	Neu5Aca2-3Galb1-4GlcNAcb1-6(Neu5Aca2-3Galb1-4GlcNAcb1-2)Mana1-6(GlcNAcb1-4)(Neu5Aca2-3Galb1-4GlcNAcb1-2Mana1-3)Manb1-4GlcNAcb1-4GlcNAcb-Sp21	-40.6527	-33.4216	-11.3042	3.08365	-13.5379	-3.7872		6.64386	6.64386	6.64386	6.64386	6.64386	6.64386		0	0	0	0	0
ConA	466	A3B	Neu5Aca2-6Galb1-4GlcNAcb1-6(Neu5Aca2-6Galb1-4GlcNAcb1-2)Mana1-6(GlcNAcb1-4)(Neu5Aca2-6Galb1-4GlcNAcb1-2Mana1-3)Manb1-4GlcNAcb1-4GlcNAcb-Sp21	-12.3907	-87.9565	-21.7941	-6.54612	-2.8718	3.8226		6.64386	6.64386	6.64386	6.64386	6.64386	6.64386		0	0	0	0	0
ConA	463	A4B	Neu5Aca2-3Galb1-4GlcNAcb1-6(Neu5Aca2-3Galb1-4GlcNAcb1-2)Mana1-6(GlcNAcb1-4)(Neu5Aca2-3Galb1-4GlcNAcb1-4(Neu5Aca2-3Galb1-4GlcNAcb1-2)Mana1-3)Manb1-4GlcNAcb1-4GlcNAcb-Sp21	-129.351	37.2611	-3.98372	-2.39073	-13.9583	-2.1891		6.64386	6.64386	6.64386	6.64386	6.64386	6.64386		0	0	0	0	0
ConA	467	A4B	Neu5Aca2-6Galb1-4GlcNAcb1-6(Neu5Aca2-6Galb1-4GlcNAcb1-2)Mana1-6(GlcNAcb1-4)(Neu5Aca2-6Galb1-4GlcNAcb1-4(Neu5Aca2-6Galb1-4GlcNAcb1-2)Mana1-3)Manb1-4GlcNAcb1-4GlcNAcb-Sp21	-76.9577	-1.17933	61.65	-3.09362	-4.12043	-1.28473		6.64386	6.64386	6.64386	6.64386	6.64386	6.64386		0	0	0	0	0
ConA	93	Adi	GalNAca1-3Galb-Sp8	-71.8881	-14.5566	159.06	-3.17328	0.310325	7.14508		6.64386	6.64386	7.31342	6.64386	6.64386	6.64386		0	-0.669569	0.669569	0	0
ConA	116	alpha Gal	Gala1-3Galb1-4GlcNAcb-Sp8	-37.1272	-23.0605	1.38005	0.94995	1.8993	8.65842		6.64386	6.64386	6.64386	6.64386	6.64386	6.64386		0	0	0	0	0
ConA	561	alpha Gal like	Gala1-3Galb1-4GlcNAcb1-2Mana1-6(Gala1-3Galb1-4GlcNAcb1-2Mana1-3)Manb1-4GlcNAcb1-4GlcNAc-Sp24	37351.7	35826.8	6329.14	258.636	134.546	25.6022		15.1889	15.1288	12.6278	8.01478	7.07195	6.64386		0.0601343	2.50096	4.61302	0.942824	0.428097
ConA	490	alpha Gal like	Gala1-3Galb1-3GlcNAcb1-6GalNAca-Sp14	-70.7864	8.04833	17.732	6.9591	-5.67512	-10.6434		6.64386	6.64386	6.64386	6.64386	6.64386	6.64386		0	0	0	0	0
ConA	496	alpha Gal like	Gala1-3Galb1-4GlcNAcb1-6GalNAca-Sp14	781.923	-29.5528	25.2872	-6.86468	-7.77783	-8.90995		9.61088	6.64386	6.64386	6.64386	6.64386	6.64386		2.96703	0	0	0	0
ConA	406	alpha Gal like	Gala1-3Galb1-4GlcNacb1-3GalNaca-Sp14	83.8139	-30.1962	29.436	11.9004	-3.37532	6.01232		6.64386	6.64386	6.64386	6.64386	6.64386	6.64386		0	0	0	0	0
ConA	522	alpha Gal like	Gala1-3Galb1-4GlcNAcb1-2Mana-Sp0	-0.19115	-61.7356	6.14558	-9.11577	-6.90728	8.44337		6.64386	6.64386	6.64386	6.64386	6.64386	6.64386		0	0	0	0	0
ConA	119	Bdi	Gala1-3Galb-Sp8	26.0327	-11.5586	0.473525	1.0074	11.6395	18.4808		6.64386	6.64386	6.64386	6.64386	6.64386	6.64386		0	0	0	0	0
ConA	91	BG-A	GalNAca1-3(Fuca1-2)Galb-Sp18	58.5964	-7.10165	11.04	11.2768	-0.0312	4.23065		6.64386	6.64386	6.64386	6.64386	6.64386	6.64386		0	0	0	0	0
ConA	90	BG-A	GalNAca1-3(Fuca1-2)Galb-Sp8	-2.66647	-24.2891	39.4829	-0.04425	0.053675	-8.94117		6.64386	6.64386	6.64386	6.64386	6.64386	6.64386		0	0	0	0	0
ConA	337	BG-A--	GalNAca1-3(Fuca1-2)Galb1-4GlcNAcb1-3Galb1-4GlcNAcb1-3Galb1-4GlcNAcb-Sp0	-86.7069	43.7489	107.285	17.9761	5.01465	34.2519		6.64386	6.64386	6.74531	6.64386	6.64386	6.64386		0	-0.101452	0.101452	0	0
ConA	336	BG-A--	GalNAca1-3(Fuca1-2)Galb1-4GlcNAcb1-3Galb1-4GlcNAcb-Sp0	-46.5358	-30.5196	-1.58573	-7.70893	6.535	2.25735		6.64386	6.64386	6.64386	6.64386	6.64386	6.64386		0	0	0	0	0
ConA	83	BG-A1	GalNAca1-3(Fuca1-2)Galb1-3GlcNAcb-Sp0	-115.162	53.3311	0.86525	-1.25978	-7.66292	-0.77975		6.64386	6.64386	6.64386	6.64386	6.64386	6.64386		0	0	0	0	0
ConA	425	BG-A1	GalNAca1-3(Fuca1-2)Galb1-3GlcNAcb1-3GalNAc-Sp14	-183.868	-82.3068	38.9604	-7.69678	-8.90343	25.3364		6.64386	6.64386	6.64386	6.64386	6.64386	6.64386		0	0	0	0	0
ConA	458	BG-A1--	GalNAca1-3(Fuca1-2)Galb1-3GlcNAcb1-2Mana1-6(GalNAca1-3(Fuca1-2)Galb1-3GlcNAcb1-2Mana1-3)Manb1-4GlcNAcb1-4(Fuca1-6)GlcNAcb-Sp22	21192	16618.1	2416.38	143.278	133.581	-1.47182		14.3712	14.0205	11.2386	7.16267	7.06157	6.64386		0.350767	2.78183	4.07596	0.101097	0.417716
ConA	374	BG-A1--	GalNAca1-3(Fuca1-2)Galb1-3GlcNAcb1-2Mana1-6(GalNAca1-3(Fuca1-2)Galb1-3GlcNAcb1-2Mana1-3)Manb1-4GlcNAcb1-4GlcNAcb-Sp20	8174.34	2946.23	439.958	22.7505	-1.15513	6.30538		12.9969	11.5247	8.78122	6.64386	6.64386	6.64386		1.47223	2.74343	2.13737	0	0
ConA	507	BG-A1 like	GalNAca1-3(Fuca1-2)Galb1-3GlcNAcb1-6GalNAca-Sp14	-33.9076	-41.634	-19.8373	-10.4976	-8.88517	-10.5947		6.64386	6.64386	6.64386	6.64386	6.64386	6.64386		0	0	0	0	0
ConA	86	BG-A2	GalNAca1-3(Fuca1-2)Galb1-4GlcNAcb-Sp0	-6.7366	2.62547	9.1843	4.88497	1.0018	-2.63072		6.64386	6.64386	6.64386	6.64386	6.64386	6.64386		0	0	0	0	0
ConA	87	BG-A2	GalNAca1-3(Fuca1-2)Galb1-4GlcNAcb-Sp8	-25.0631	-26.4543	13.5137	-0.680875	-4.25188	5.75375		6.64386	6.64386	6.64386	6.64386	6.64386	6.64386		0	0	0	0	0
ConA	371	BG-A2--	GalNAca1-3(Fuca1-2)Galb1-4GlcNAcb1-2Mana1-6(GalNAca1-3(Fuca1-2)Galb1-4GlcNAcb1-2Mana1-3)Manb1-4GlcNAcb1-4GlcNAcb-Sp20	12988.2	6552.72	187.625	7.6363	-4.291	5.0466		13.6649	12.6779	7.55171	6.64386	6.64386	6.64386		0.987041	5.12617	0.907851	0	0
ConA	455	BG-A2--	GalNAca1-3(Fuca1-2)Galb1-4GlcNAcb1-2Mana1-6(GalNAca1-3(Fuca1-2)Galb1-4GlcNAcb1-2Mana1-3)Manb1-4GlcNAcb1-4(Fuca1-6)GlcNAcb-Sp22	21180	658.055	2511.52	50.9211	-5.1296	-2.4608		14.3704	9.36206	11.2943	6.64386	6.64386	6.64386		5.00835	-1.93228	4.65049	0	0
ConA	415	BG-A2--	GalNAca1-3(Fuca1-2)Galb1-4GlcNAcb1-3GalNAca-Sp14	-32.3345	-8.02887	56.6063	0.096975	-1.14663	7.8669		6.64386	6.64386	6.64386	6.64386	6.64386	6.64386		0	0	0	0	0
ConA	419	BG-A2--	GalNAca1-3(Fuca1-2)Galb1-4(Fuca1-3)GlcNAcb1-3GalNAc-Sp14	41.7849	-18.3872	160.374	18.357	17.2686	52.5586		6.64386	6.64386	7.3253	6.64386	6.64386	6.64386		0	-0.681443	0.681443	0	0
ConA	452	BG-A2--	GalNAca1-3(Fuca1-2)Galb1-4GlcNAcb1-6(GalNAca1-3(Fuca1-2)Galb1-4GlcNAcb1-3)GalNAc-Sp14	-93.3812	-70.6618	4.7473	-11.6442	-7.70472	-0.1059		6.64386	6.64386	6.64386	6.64386	6.64386	6.64386		0	0	0	0	0
ConA	520	BG-A2 like	GalNAca1-3(Fuca1-2)Galb1-4GlcNAcb1-6GalNAc-Sp14	183.13	-34.8245	7.90297	-4.97905	-4.84788	3.4329		7.51672	6.64386	6.64386	6.64386	6.64386	6.64386		0.872867	0	0	0	0
ConA	524	BG-A2 like	GalNAca1-3(Fuca1-2)Galb1-4 GlcNAcb1-2Mana-Sp0	-41.9562	-58.6373	17.0419	-16.8678	-5.7972	-2.7472		6.64386	6.64386	6.64386	6.64386	6.64386	6.64386		0	0	0	0	0
ConA	394	BG-A3	GalNAca1-3(Fuca1-2)Galb1-3GalNAca1-3(Fuca1-2)Galb1-4GlcNAcb-Sp0	63.2906	-85.6996	10.4233	-7.04603	3.96348	5.8203		6.64386	6.64386	6.64386	6.64386	6.64386	6.64386		0	0	0	0	0
ConA	88	BG-A6	GalNAca1-3(Fuca1-2)Galb1-4Glcb-Sp0	26.745	-11.7065	23.1677	2.4843	3.08358	10.1158		6.64386	6.64386	6.64386	6.64386	6.64386	6.64386		0	0	0	0	0
ConA	109	BG-B tri	Gala1-3(Fuca1-2)Galb-Sp18	-41.5993	14.4207	12.0842	5.13583	1.32085	4.90447		6.64386	6.64386	6.64386	6.64386	6.64386	6.64386		0	0	0	0	0
ConA	108	BG-B tri	Gala1-3(Fuca1-2)Galb-Sp8	24.5776	-18.9715	38.1071	9.46955	-3.03895	0.94		6.64386	6.64386	6.64386	6.64386	6.64386	6.64386		0	0	0	0	0
ConA	102	BG-B1	Gala1-3(Fuca1-2)Galb1-3GlcNAcb-Sp0	226.301	17.4505	24.0281	10.7504	15.0016	15.3511		7.8221	6.64386	6.64386	6.64386	6.64386	6.64386		1.17824	0	0	0	0
ConA	103	BG-B1	Gala1-3(Fuca1-2)Galb1-3GlcNAcb-Sp8	-9.56642	-24.7543	143.926	16.0403	20.7465	22.5014		6.64386	6.64386	7.16918	6.64386	6.64386	6.64386		0	-0.525327	0.525327	0	0
ConA	424	BG-B1	Gala1-3(Fuca1-2)Galb1-3GlcNAcb1-3GalNAc-Sp14	12.4882	-55.1587	32.6585	-12.4014	-3.11613	4.11037		6.64386	6.64386	6.64386	6.64386	6.64386	6.64386		0	0	0	0	0
ConA	456	BG-B1--	Gala1-3(Fuca1-2)Galb1-3GlcNAcb1-2Mana1-6(Gala1-3(Fuca1-2)Galb1-3GlcNAcb1-2Mana1-3)Manb1-4GlcNAcb1-4(Fuca1-6)GlcNAcb-Sp22	31035.9	19257.7	4578.43	211.436	126.754	-5.69362		14.9216	14.2332	12.1606	7.72408	6.98588	6.64386		0.688497	2.07251	4.43656	0.738197	0.342026
ConA	375	BG-B1--	Gala1-3(Fuca1-2)Galb1-3GlcNAcb1-2Mana1-6(Gala1-3(Fuca1-2)Galb1-3GlcNAcb1-2Mana1-3)Manb1-4GlcNAcb1-4GlcNAcb-Sp20	15798.5	5114.48	840.814	22.8648	18.6126	3.07703		13.9475	12.3204	9.71564	6.64386	6.64386	6.64386		1.62713	2.60473	3.07179	0	0
ConA	538	BG-B1 like	Gala1-3(Fuca1-2)Galb1-3GalNAcb1-3Gala1-4Galb1-4Glc-Sp21	-129.927	-62.6608	-1.9333	-1.40605	-6.35608	2.9147		6.64386	6.64386	6.64386	6.64386	6.64386	6.64386		0	0	0	0	0
ConA	526	BG-B1 like	Gala1-3(Fuca1-2)Galb1-3GlcNAcb1-6GalNAc-Sp14	256.888	-68.3964	12.4826	3.15768	-6.56327	5.502		8.005	6.64386	6.64386	6.64386	6.64386	6.64386		1.36114	0	0	0	0
ConA	106	BG-B2	Gala1-3(Fuca1-2)Galb1-4GlcNAc-Sp0	-9.8956	-10.7291	12.2342	-7.3822	3.36788	5.9128		6.64386	6.64386	6.64386	6.64386	6.64386	6.64386		0	0	0	0	0
ConA	372	BG-B2--	Gala1-3(Fuca1-2)Galb1-4GlcNAcb1-2Mana1-6(Gala1-3(Fuca1-2)Galb1-4GlcNAcb1-2Mana1-3)Manb1-4GlcNAcb1-4GlcNAcb-Sp20	27109.7	11992	511.395	14.2878	25.3162	-0.639075		14.7265	13.5498	8.99829	6.64386	6.64386	6.64386		1.17674	4.55148	2.35444	0	0
ConA	414	BG-B2--	Gala1-3(Fuca1-2)Galb1-4GlcNAcb1-3GalNAca-Sp14	107.862	4.5589	33.0917	5.23288	-1.47417	0.478125		6.75305	6.64386	6.64386	6.64386	6.64386	6.64386		0.109191	0	0	0	0
ConA	418	BG-B2--	Gala1-3(Fuca1-2)Galb1-4(Fuca1-3)GlcNAcb1-3GalNAc-Sp14	22.972	-59.8239	11.71	3.15313	8.425	5.93123		6.64386	6.64386	6.64386	6.64386	6.64386	6.64386		0	0	0	0	0
ConA	451	BG-B2--	Gala1-3Fuca1-2Galb1-4GlcNAcb1-6(Gala1-3Fuca1-2Galb1-4GlcNAcb1-3)GalNAc-Sp14	-176.646	-72.1616	34.5454	-17.9658	-14.6782	-1.7125		6.64386	6.64386	6.64386	6.64386	6.64386	6.64386		0	0	0	0	0
ConA	428	BG-B2 like	Gala1-3(Fuca1-2)Galb1-4GlcNAcb1-2Mana1-6(Gala1-3(Fuca1-2)Galb1-4GlcNAcb1-2Mana1-3)Manb1-4GlcNAcb1-4(Fuca1-6)GlcNAcb-Sp22	19106.2	11957.8	1966.85	51.4024	19.5741	-3.5998		14.2218	13.5457	10.9417	6.64386	6.64386	6.64386		0.676091	2.60399	4.29782	0	0
ConA	499	BG-B2 like	Gala1-3(Fuca1-2)Galb1-4GlcNAcb1-6GalNAca-Sp14	77.4585	12.9438	64.7678	-2.5345	-10.6668	-8.14105		6.64386	6.64386	6.64386	6.64386	6.64386	6.64386		0	0	0	0	0
ConA	523	BG-B2 like	Gala1-3(Fuca1-2)Galb1-4GlcNAcb1-2Mana-Sp0	-68.0965	-36.5776	8.05372	-8.40102	-1.6755	-5.7964		6.64386	6.64386	6.64386	6.64386	6.64386	6.64386		0	0	0	0	0
ConA	468	BG-B3	Gala1-3(Fuca1-2)Galb1-3GalNAca-Sp8	-11.9661	-83.1932	-1.23042	-2.75225	3.6351	-12.2583		6.64386	6.64386	6.64386	6.64386	6.64386	6.64386		0	0	0	0	0
ConA	469	BG-B4	Gala1-3(Fuca1-2)Galb1-3GalNAcb-Sp8	-109.961	-82.2305	6.18625	-0.207675	-4.81645	1.41498		6.64386	6.64386	6.64386	6.64386	6.64386	6.64386		0	0	0	0	0
ConA	410	BG-B6	Gala1-3(Fuca1-2)Galb1-4(Fuca1-3)Glcb-Sp21	24.2872	43.6634	64.7629	8.21293	1.77605	8.65975		6.64386	6.64386	6.64386	6.64386	6.64386	6.64386		0	0	0	0	0
ConA	107	BG-B6	Gala1-3(Fuca1-2)Galb1-4Glcb-Sp0	-41.2053	-38.8064	15.458	-11.764	-8.13263	7.93313		6.64386	6.64386	6.64386	6.64386	6.64386	6.64386		0	0	0	0	0
ConA	79	BG-H	Fuca1-2Galb-Sp8	-72.0542	-32.7726	16.9416	0.045275	-2.45237	10.5793		6.64386	6.64386	6.64386	6.64386	6.64386	6.64386		0	0	0	0	0
ConA	501	BG-H like	Fuca1-2Galb1-3(6S)GlcNAcb-Sp0	140.295	106.044	74.3271	-26.0084	-8.2102	7.4312		7.13232	6.72852	6.64386	6.64386	6.64386	6.64386		0.403798	0.0846657	0	0	0
ConA	502	BG-H like	Fuca1-2(6S)Galb1-3(6S)GlcNAcb-Sp0	69.4762	1.26303	145.979	-25.5782	-14.015	-16.7897		6.64386	6.64386	7.18961	6.64386	6.64386	6.64386		0	-0.545756	0.545756	0	0
ConA	67	BG-H1	Fuca1-2Galb1-3GlcNAcb1-3Galb1-4Glcb-Sp10	24.2793	27.6742	37.1755	-6.67487	-1.20133	-2.70883		6.64386	6.64386	6.64386	6.64386	6.64386	6.64386		0	0	0	0	0
ConA	66	BG-H1	Fuca1-2Galb1-3GlcNAcb1-3Galb1-4Glcb-Sp8	43.1978	-8.86913	287.53	10.0902	7.23102	3.95955		6.64386	6.64386	8.16757	6.64386	6.64386	6.64386		0	-1.52371	1.52371	0	0
ConA	69	BG-H1	Fuca1-2Galb1-3GlcNAcb-Sp8	-42.621	-27.9269	20.8829	7.02595	-6.5916	-3.53555		6.64386	6.64386	6.64386	6.64386	6.64386	6.64386		0	0	0	0	0
ConA	68	BG-H1	Fuca1-2Galb1-3GlcNAcb-Sp0	34.7097	-28.4837	8.88085	7.05858	1.90523	0.137925		6.64386	6.64386	6.64386	6.64386	6.64386	6.64386		0	0	0	0	0
ConA	423	BG-H1	Fuca1-2Galb1-3GlcNAcb1-3GalNAc-Sp14	169.6	-33.264	24.9234	-4.9993	-11.7546	-11.3626		7.406	6.64386	6.64386	6.64386	6.64386	6.64386		0.76214	0	0	0	0
ConA	223	BG-H1 (di-sulfated)	Fuca1-2(6S)Galb1-4(6S)Glcb-Sp0	380.203	43.6388	77.0499	1.2451	8.01052	2.17115		8.57062	6.64386	6.64386	6.64386	6.64386	6.64386		1.92677	0	0	0	0
ConA	222	BG-H1 (sulfated)	Fuca1-2Galb1-4(6S)GlcNAcb-Sp8	87.0055	29.3866	5.96125	6.8542	-2.01203	-1.8623		6.64386	6.64386	6.64386	6.64386	6.64386	6.64386		0	0	0	0	0
ConA	221	BG-H1 (sulfated)	Fuca1-2(6S)Galb1-4GlcNAcb-Sp0	0.53665	-1.50503	17.7334	3.35632	-0.9846	1.6725		6.64386	6.64386	6.64386	6.64386	6.64386	6.64386		0	0	0	0	0
ConA	506	BG-H1 like	Fuca1-2Galb1-3GlcNAcb1-6(Fuca1-2Galb1-3GlcNAcb1-3)GalNAca-Sp14	1105.37	658.007	193.894	18.1244	3.84475	22.6453		10.1103	9.36196	7.59913	6.64386	6.64386	6.64386		0.748351	1.76283	0.955271	0	0
ConA	369	BG-H1/LeX	Galb1-4(Fuca1-3)GlcNAcb1-6(Fuca1-2Galb1-4GlcNAcb1-3)Galb1-4Glc-Sp21	96.7702	84.0281	12.8471	6.2731	-1.66693	12.9154		6.64386	6.64386	6.64386	6.64386	6.64386	6.64386		0	0	0	0	0
ConA	361	BG-H1-Man3	Fuca1-2Galb1-3GlcNAcb1-2Mana1-6(Fuca1-2Galb1-3GlcNAcb1-2Mana1-3)Manb1-4GlcNAcb1-4GlcNAcb-Sp20	21541.3	10210.9	1527.51	66.1859	65.4293	41.1232		14.3948	13.3178	10.577	6.64386	6.64386	6.64386		1.07699	2.74086	3.93311	0	0
ConA	427	BG-H1-Man3F	Fuca1-2Galb1-3GlcNAcb1-2Mana1-6(Fuca1-2Galb1-3GlcNAcb1-2Mana1-3)Manb1-4GlcNAcb1-4(Fuca1-6)GlcNAcb-Sp22	24045	13474.8	2705.29	101.633	105.682	19.7939		14.5534	13.718	11.4016	6.66723	6.72359	6.64386		0.835474	2.31641	4.73434	-0.0563617	0.0797331
ConA	76	BG-H2	Fuca1-2Galb1-4GlcNAcb-Sp0	-6.3897	12.7643	22.606	2.38355	-2.67035	0.2828		6.64386	6.64386	6.64386	6.64386	6.64386	6.64386		0	0	0	0	0
ConA	77	BG-H2	Fuca1-2Galb1-4GlcNAcb-Sp8	18.1595	-20.3674	11.4377	-8.02715	3.6455	3.9092		6.64386	6.64386	6.64386	6.64386	6.64386	6.64386		0	0	0	0	0
ConA	401	BG-H2	Fuca1-2Galb1-4GlcNacb1-3GalNaca-Sp14	31.0158	-54.6919	20.4959	-7.7827	-5.03012	16.2888		6.64386	6.64386	6.64386	6.64386	6.64386	6.64386		0	0	0	0	0
ConA	362	BG-H2--	Fuca1-2Galb1-4GlcNAcb1-2Mana1-6(Fuca1-2Galb1-4GlcNAcb1-2Mana1-3)Manb1-4GlcNAcb1-4GlcNAcb-Sp20	25728.2	16162.8	1150.21	18.4126	7.3196	7.53207		14.6511	13.9804	10.1677	6.64386	6.64386	6.64386		0.670675	3.8127	3.52383	0	0
ConA	74	BG-H2--	Fuca1-2Galb1-4GlcNAcb1-3Galb1-4GlcNAcb-Sp0	7.66098	-9.75108	10.8791	1.43765	-3.89102	1.8678		6.64386	6.64386	6.64386	6.64386	6.64386	6.64386		0	0	0	0	0
ConA	75	BG-H2--	Fuca1-2Galb1-4GlcNAcb1-3Galb1-4GlcNAcb1-3Galb1-4GlcNAcb-Sp0	582.05	-16.6342	5.63668	8.33922	-3.4451	2.52635		9.185	6.64386	6.64386	6.64386	6.64386	6.64386		2.54114	0	0	0	0
ConA	500	BG-H2--	Fuca1-2Galb1-4GlcNAcb1-2Mana-Sp0	-169.126	-93.4971	37.1056	-29.3399	-23.2314	-8.36732		6.64386	6.64386	6.64386	6.64386	6.64386	6.64386		0	0	0	0	0
ConA	545	BG-H2 like	Fuca1-2Galb1-4GlcNAcb1-3Galb1-4GlcNAcb1-2Mana1-6(Fuca1-2Galb1-4GlcNAcb1-3Galb1-4GlcNAcb1-2Mana1-3)Manb1-4GlcNAcb1-4GlcNAcb-Sp24	45293.5	30494.3	2098.1	16.6361	18.0045	41.4604		15.467	14.8963	11.0349	6.64386	6.64386	6.64386		0.570765	3.86138	4.39101	0	0
ConA	421	BG-H2 like	Fuca1-2Galb1-4GlcNAcb1-2Mana1-6(Fuca1-2Galb1-4GlcNAcb1-2Mana1-3)Manb1-4GlcNAcb1-4(Fuca1-6)GlcNAcb-Sp22	29669.7	13570.3	2678.31	193.835	6.49348	-17.9335		14.8567	13.7282	11.3871	7.59869	6.64386	6.64386		1.12853	2.34106	3.78842	0.954832	0
ConA	446	BG-H2 like	Fuca1-2Galb1-4 GlcNAcb1-2Mana1-6(Fuca1-2Galb1-4GlcNAcb1-2(Fuca1-2Galb1-4GlcNAcb1-4)Mana1-3)Manb1-4GlcNAcb1-4GlcNAcb-N	3768.04	1597.49	402.077	15.6104	7.74065	22.2675		11.8796	10.6416	8.65133	6.64386	6.64386	6.64386		1.238	1.99027	2.00747	0	0
ConA	495	BG-H2 like	Fuca1-2Galb1-4GlcNAcb1-6GalNAca-Sp14	992.38	548.914	273.264	13.1747	3.19832	8.94955		9.95475	9.10044	8.09415	6.64386	6.64386	6.64386		0.854312	1.00629	1.45029	0	0
ConA	450	BG-H2 like	Fuca1-2Galb1-4GlcNAcb1-6(Fuca1-2Galb1-4GlcNAcb1-3)GalNAc-Sp14	160.951	-36.0572	54.3224	-14.2953	-15.8189	-2.19955		7.33048	6.64386	6.64386	6.64386	6.64386	6.64386		0.686625	0	0	0	0
ConA	63	BG-H3	Fuca1-2Galb1-3GalNAca-Sp14	602.697	326.398	94.7083	9.67887	0.859975	10.6321		9.23529	8.35049	6.64386	6.64386	6.64386	6.64386		0.884801	1.70663	0	0	0
ConA	62	BG-H3	Fuca1-2Galb1-3GalNAca-Sp8	-10.7182	-6.31023	-0.92905	1.0733	2.71005	-8.18645		6.64386	6.64386	6.64386	6.64386	6.64386	6.64386		0	0	0	0	0
ConA	390	BG-H3--	Fuca1-2Galb1-3GalNAca1-3(Fuca1-2)Galb1-4Glcb-Sp0	-33.3173	-13.6089	2.75323	12.3084	4.81777	4.8925		6.64386	6.64386	6.64386	6.64386	6.64386	6.64386		0	0	0	0	0
ConA	391	BG-H3--	Fuca1-2Galb1-3GalNAca1-3(Fuca1-2)Galb1-4GlcNAcb-Sp0	-20.3938	-17.8131	23.7757	0.91775	5.49325	-1.4546		6.64386	6.64386	6.64386	6.64386	6.64386	6.64386		0	0	0	0	0
ConA	59	BG-H4	Fuca1-2Galb1-3GalNAcb1-3Gala-Sp9	-174.112	97.731	44.903	8.50865	5.38685	1.60352		6.64386	6.64386	6.64386	6.64386	6.64386	6.64386		0	0	0	0	0
ConA	263	BG-H6 (sulfated)	Fuca1-2Galb1-4(6S)Glcb-Sp0	-81.2263	6.20073	22.721	0.98475	3.4708	8.36187		6.64386	6.64386	6.64386	6.64386	6.64386	6.64386		0	0	0	0	0
ConA	249	BG-H6 (sulfated)	Fuca1-2(6S)Galb1-4Glcb-Sp0	-37.3039	3.89017	20.8514	0.4212	10.7255	3.00588		6.64386	6.64386	6.64386	6.64386	6.64386	6.64386		0	0	0	0	0
ConA	321	biantennary	GlcNAcb1-2Mana1-6(Neu5Aca2-6Galb1-4GlcNAcb1-2Mana1-3)Manb1-4GlcNAcb1-4GlcNAcb-Sp12	42652.5	50437.4	5548.44	253.15	669.708	14.7385		15.3803	15.6222	12.4379	7.98385	9.38739	6.64386		-0.241863	3.18434	4.45402	-1.40354	2.74353
ConA	199	cellobiose	Glcb1-4Glcb-Sp8	63.1602	-1.50477	56.1023	0.821225	3.05717	7.94412		6.64386	6.64386	6.64386	6.64386	6.64386	6.64386		0	0	0	0	0
ConA	311	chitobiose	GlcNAcb1-4GlcNAcb-Sp10	-41.4275	-42.6471	3.6933	7.4517	0.4015	-3.41137		6.64386	6.64386	6.64386	6.64386	6.64386	6.64386		0	0	0	0	0
ConA	312	chitobiose	GlcNAcb1-4GlcNAcb-Sp12	-92.7839	-73.9403	5.25717	-8.37772	-0.965625	13.6352		6.64386	6.64386	6.64386	6.64386	6.64386	6.64386		0	0	0	0	0
ConA	190	chitohexaose	GlcNAcb1-4GlcNAcb1-4GlcNAcb1-4GlcNAcb1-4GlcNAcb1-4GlcNAcb1-Sp8	-21.7648	-19.8172	32.8164	7.08005	6.40468	9.6264		6.64386	6.64386	6.64386	6.64386	6.64386	6.64386		0	0	0	0	0
ConA	191	chitopentaose	GlcNAcb1-4GlcNAcb1-4GlcNAcb1-4GlcNAcb1-4GlcNAcb1-Sp8	-109.781	127.492	13.4052	-6.3194	28.2702	10.904		6.64386	6.99426	6.64386	6.64386	6.64386	6.64386		-0.350402	0.350402	0	0	0
ConA	192	chitotriose	GlcNAcb1-4GlcNAcb1-4GlcNAcb-Sp8	-44.5395	-29.255	6.98273	0.530525	2.12923	3.6148		6.64386	6.64386	6.64386	6.64386	6.64386	6.64386		0	0	0	0	0
ConA	134	core 2	GlcNAcb1-6(Galb1-3)GalNAca-Sp8	-12.0166	2.56045	19.5968	8.34378	11.0315	6.16555		6.64386	6.64386	6.64386	6.64386	6.64386	6.64386		0	0	0	0	0
ConA	135	core 2	GlcNAcb1-6(Galb1-3)GalNAca-Sp14	2.1194	-17.791	34.6966	-3.911	-4.30485	-4.6824		6.64386	6.64386	6.64386	6.64386	6.64386	6.64386		0	0	0	0	0
ConA	181	core 3	GlcNAcb1-3GalNAca-Sp14	19.0661	6.22082	20.7456	3.7698	4.37347	0.963675		6.64386	6.64386	6.64386	6.64386	6.64386	6.64386		0	0	0	0	0
ConA	180	core 3	GlcNAcb1-3GalNAca-Sp8	-25.2999	-14.1532	2.56922	5.5145	5.59777	1.48963		6.64386	6.64386	6.64386	6.64386	6.64386	6.64386		0	0	0	0	0
ConA	177	core 4	GlcNAcb1-6(GlcNAcb1-3)GalNAca-Sp8	-35.6792	-4.28358	24.0676	-1.32512	0.732125	6.97335		6.64386	6.64386	6.64386	6.64386	6.64386	6.64386		0	0	0	0	0
ConA	194	core 6	GlcNAcb1-6GalNAca-Sp14	-55.9138	-17.4348	42.6776	-6.15302	-4.49342	2.13305		6.64386	6.64386	6.64386	6.64386	6.64386	6.64386		0	0	0	0	0
ConA	193	core 6	GlcNAcb1-6GalNAca-Sp8	-101.584	-83.1568	16.26	-10.5872	-2.35135	-9.53025		6.64386	6.64386	6.64386	6.64386	6.64386	6.64386		0	0	0	0	0
ConA	232	CT/Sda	GalNAcb1-4(Neu5Aca2-3)Galb1-4GlcNAcb-Sp0	-2.89797	-11.8115	47.6821	5.72565	-2.10062	-6.36257		6.64386	6.64386	6.64386	6.64386	6.64386	6.64386		0	0	0	0	0
ConA	233	CT/Sda	GalNAcb1-4(Neu5Aca2-3)Galb1-4GlcNAcb-Sp8	51.7916	-12.4152	19.3052	0.688475	-4.18497	-1.7673		6.64386	6.64386	6.64386	6.64386	6.64386	6.64386		0	0	0	0	0
ConA	385	DFLNHc, LacNAc/LeB	Galb1-4GlcNAcb1-6(Fuca1-4(Fuca1-2Galb1-3)GlcNAcb1-3)Galb1-4Glc-Sp21	1959.57	1168.03	142.451	6.81457	14.9282	-1.16927		10.9363	10.1899	7.15432	6.64386	6.64386	6.64386		0.746455	3.03555	0.510465	0	0
ConA	290	Di-LeC, pLNH tetra	Galb1-3GlcNAcb1-3Galb1-3GlcNAcb-Sp0	-39.4551	-29.6009	21.8177	2.83878	-2.82863	-2.21845		6.64386	6.64386	6.64386	6.64386	6.64386	6.64386		0	0	0	0	0
ConA	236	diSialyl-Tn	Neu5Aca2-6(Neu5Aca2-3)GalNAca-Sp8	196.434	-57.1387	-2.13405	4.00248	-10.7063	-9.21045		7.6179	6.64386	6.64386	6.64386	6.64386	6.64386		0.974046	0	0	0	0
ConA	132	F1alpha	Galb1-4GlcNAcb1-6GalNAca-Sp8	-36.5363	67.501	19.11	4.24333	-2.25227	4.04583		6.64386	6.64386	6.64386	6.64386	6.64386	6.64386		0	0	0	0	0
ConA	24	FL(3'6diSu-)	(3S)Galb1-4(Fuca1-3)(6S)Glc-Sp0	130.445	32.0985	16.0878	31.5166	17.0523	27.6197		7.0273	6.64386	6.64386	6.64386	6.64386	6.64386		0.383442	0	0	0	0
ConA	416	Forssman	GalNAca1-3GalNAcb1-3Gala1-4Galb1-4Glcb-Sp0	-3.4682	-16.3691	-1.81137	-4.68887	2.42882	-7.16518		6.64386	6.64386	6.64386	6.64386	6.64386	6.64386		0	0	0	0	0
ConA	92	forssman di	GalNAca1-3GalNAcb-Sp8	313.572	-35.3537	7.60625	0.880175	-2.81232	-0.10965		8.29265	6.64386	6.64386	6.64386	6.64386	6.64386		1.64879	0	0	0	0
ConA	403	Forssman-like	GalNaca1-3GalNacb1-3Gala1-4Galb1-4GlcNacb-Sp0	-99.8533	-44.8074	16.5835	4.26305	-0.7588	-2.93283		6.64386	6.64386	6.64386	6.64386	6.64386	6.64386		0	0	0	0	0
ConA	6	Fuc-a	Fuca-Sp8	161.217	-12.8071	15.7667	-7.71743	2.51993	3.32747		7.33286	6.64386	6.64386	6.64386	6.64386	6.64386		0.689003	0	0	0	0
ConA	7	Fuc-a	Fuca-Sp9	-68.0517	-20.3921	32.7538	4.16147	-6.12335	5.82735		6.64386	6.64386	6.64386	6.64386	6.64386	6.64386		0	0	0	0	0
ConA	64	Fuc-GM1a	Fuca1-2Galb1-3GalNAcb1-4(Neu5Aca2-3)Galb1-4Glcb-Sp0	167.118	69.7253	34.2465	9.67647	5.91133	3.43665		7.38473	6.64386	6.64386	6.64386	6.64386	6.64386		0.740871	0	0	0	0
ConA	65	Fuc-GM1a	Fuca1-2Galb1-3GalNAcb1-4(Neu5Aca2-3)Galb1-4Glcb-Sp9	-31.1116	37.6798	15.428	0.138375	-1.58967	-3.23415		6.64386	6.64386	6.64386	6.64386	6.64386	6.64386		0	0	0	0	0
ConA	146	GA1	Galb1-3GalNAcb1-4Galb1-4Glcb-Sp8	-33.6198	-16.1102	13.2013	6.16778	-0.098425	12.5699		6.64386	6.64386	6.64386	6.64386	6.64386	6.64386		0	0	0	0	0
ConA	143	GA1di, TFbb	Galb1-3GalNAcb-Sp8	6.2443	12.2506	27.4016	-0.6232	-2.91345	-4.5302		6.64386	6.64386	6.64386	6.64386	6.64386	6.64386		0	0	0	0	0
ConA	454	GA2 (asialo-GM2)	GalNAcb1-4Galb1-4Glcb-Sp0	-92.5033	-79.3995	165.207	-8.80557	6.35743	0.386975		6.64386	6.64386	7.36813	6.64386	6.64386	6.64386		0	-0.724272	0.724272	0	0
ConA	1	Gal-a	Gala-Sp8	425.473	-49.3648	53.3739	-0.91235	1.2382	14.1307		8.73292	6.64386	6.64386	6.64386	6.64386	6.64386		2.08907	0	0	0	0
ConA	101	Gala1-2Gal	Gala1-2Galb-Sp8	390.675	-1.30695	56.1135	5.1014	2.53035	2.12185		8.60983	6.64386	6.64386	6.64386	6.64386	6.64386		1.96597	0	0	0	0
ConA	114	Gala1-3LeX	Gala1-3Galb1-4(Fuca1-3)GlcNAcb-Sp8	-18.7285	66.6771	4.5561	4.54282	-1.70655	6.24192		6.64386	6.64386	6.64386	6.64386	6.64386	6.64386		0	0	0	0	0
ConA	115	Gala3-type1	Gala1-3Galb1-3GlcNAcb-Sp0	38.6278	3.66083	-3.21553	0.7994	8.4417	4.2391		6.64386	6.64386	6.64386	6.64386	6.64386	6.64386		0	0	0	0	0
ConA	528	Gala-type 1 like	Gala1-3Galb1-3GlcNAcb1-2Mana-Sp0	21797.1	10378	101.431	-6.53995	0.71755	1.12387		14.4118	13.3412	6.66436	6.64386	6.64386	6.64386		1.07061	6.67688	0.0205015	0	0
ConA	426	Gala-type 1 like	Gala1-3Galb1-3GlcNAcb1-3GalNAc-Sp14	-103.454	-42.5754	40.6816	-12.7217	-5.88068	-6.18573		6.64386	6.64386	6.64386	6.64386	6.64386	6.64386		0	0	0	0	0
ConA	12	Gal-b	Galb-Sp8	120.365	-11.7218	47.2901	-0.98265	5.6103	1.5861		6.91127	6.64386	6.64386	6.64386	6.64386	6.64386		0.267411	0	0	0	0
ConA	38	Galb(3Su)	(3S)Galb-Sp8	-3.68133	-7.39317	119.481	-2.02545	9.76397	5.05615		6.64386	6.64386	6.90064	6.64386	6.64386	6.64386		0	-0.256781	0.256781	0	0
ConA	440	Galb1-4Gal	Galb1-4Galb-Sp10	-46.6172	-80.578	41.4545	-6.2167	3.9847	-2.931		6.64386	6.64386	6.64386	6.64386	6.64386	6.64386		0	0	0	0	0
ConA	117	Galili-tri	Gala1-3Galb1-4Glcb-Sp0	-18.0836	-18.4384	42.6072	4.1588	6.70182	14.6427		6.64386	6.64386	6.64386	6.64386	6.64386	6.64386		0	0	0	0	0
ConA	4	GalNAc-a	GalNAca-Sp8	-32.7986	-42.3057	22.9047	-4.2305	-3.01028	3.2081		6.64386	6.64386	6.64386	6.64386	6.64386	6.64386		0	0	0	0	0
ConA	15	GalNAc-b	GalNAcb-Sp8	195.325	-6.17555	38.726	-5.39965	-1.48888	12.9516		7.60973	6.64386	6.64386	6.64386	6.64386	6.64386		0.965876	0	0	0	0
ConA	97	Gb4 tetra (P1 tetra)	GalNAcb1-3Gala1-4Galb1-4GlcNAcb-Sp0	118.752	-54.1002	6.88433	-0.2541	-2.01218	18.8896		6.89181	6.64386	6.64386	6.64386	6.64386	6.64386		0.247952	0	0	0	0
ConA	335	Gb4-like	GalNAcb1-3Gala1-4Galb1-4GlcNAcb1-3Galb1-4Glcb-Sp0	-251.152	-25.5104	22.5115	-4.73308	2.13203	-7.43918		6.64386	6.64386	6.64386	6.64386	6.64386	6.64386		0	0	0	0	0
ConA	539	Gb5 tri	Galb1-3GalNAcb1-3Gal-Sp21	-227.888	-140.197	-11.2565	-12.6115	-10.1012	0.773575		6.64386	6.64386	6.64386	6.64386	6.64386	6.64386		0	0	0	0	0
ConA	144	Gb5/SSEA-3	Galb1-3GalNAcb1-3Gala1-4Galb1-4Glcb-Sp0	-88.9069	-30.9543	67.1184	1.0536	-3.26015	1.46985		6.64386	6.64386	6.64386	6.64386	6.64386	6.64386		0	0	0	0	0
ConA	235	GD1a	Neu5Aca2-3Galb1-3GalNAcb1-4(Neu5Aca2-3)Galb1-4Glcb-Sp0	-104.396	-41.0122	-18.0989	1.25683	-0.9378	-8.55105		6.64386	6.64386	6.64386	6.64386	6.64386	6.64386		0	0	0	0	0
ConA	412	GD1b	Galb1-3GalNAcb1-4(Neu5Aca2-8Neu5Aca2-3)Galb1-4Glcb-Sp0	-11.6615	2.52367	129.663	3.23348	7.23425	0.693225		6.64386	6.64386	7.01863	6.64386	6.64386	6.64386		0	-0.37477	0.37477	0	0
ConA	229	GD2	GalNAcb1-4(Neu5Aca2-8Neu5Aca2-3)Galb1-4Glcb-Sp0	-42.6439	-42.0345	173.864	-8.99488	-4.07873	-4.88495		6.64386	6.64386	7.44181	6.64386	6.64386	6.64386		0	-0.797956	0.797956	0	0
ConA	277	GD3	Neu5Aca2-8Neu5Aca2-3Galb1-4Glcb-Sp0	-31.6211	-10.7556	26.9209	5.5285	-2.55742	-1.1848		6.64386	6.64386	6.64386	6.64386	6.64386	6.64386		0	0	0	0	0
ConA	2	Glc-a	Glca-Sp8	700.632	24.7509	186.026	4.9697	4.0788	4.0339		9.45251	6.64386	7.53936	6.64386	6.64386	6.64386		2.80866	-0.895504	0.895504	0	0
ConA	202	GlcA-a	GlcAa-Sp8	128.47	154.953	111.144	4.7075	1.89342	1.58605		7.00529	7.27569	6.79629	6.64386	6.64386	6.64386		-0.270401	0.479402	0.152431	0	0
ConA	13	Glc-b	Glcb-Sp8	-53.2088	-12.7176	73.1794	7.96818	3.47862	18.7445		6.64386	6.64386	6.64386	6.64386	6.64386	6.64386		0	0	0	0	0
ConA	594	GlcNAc (core 3)	GlcNAcb1-3Galb1-4GlcNAcb1-3GalNAca-Sp14	20.2775	-32.6045	-0.762325	-1.30455	-11.173	-0.863925		6.64386	6.64386	6.64386	6.64386	6.64386	6.64386		0	0	0	0	0
ConA	596	GlcNAc (core 4)	GlcNAcb1-3Galb1-4GlcNAcb1-6(GlcNAcb1-3Galb1-4GlcNAcb1-3)GalNAca-Sp14	99.5483	-22.0342	20.7217	-5.03463	-6.68858	-3.18928		6.63733	6.64386	6.64386	6.64386	6.64386	6.64386		-0.00653069	0	0	0	0
ConA	595	GlcNAc (core 4)	GlcNAcb1-3Galb1-4GlcNAcb1-6(Galb1-3)GalNAca-Sp14	-62.3157	-73.9759	9.70172	-7.0469	-11.0481	-2.1313		6.64386	6.64386	6.64386	6.64386	6.64386	6.64386		0	0	0	0	0
ConA	581	GlcNAc ext 2 arms+F	GlcNAcb1-3Galb1-4GlcNAcb1-3Galb1-4GlcNAcb1-3Galb1-4GlcNAcb1-3Galb1-4GlcNAcb1-2Mana1-6(GlcNAcb1-3Galb1-4GlcNAcb1-3Galb1-4GlcNAcb1-3Galb1-4GlcNAcb1-3Galb1-4GlcNAcb1-2Mana1-3)Manb1-4GlcNAcb1-4(Fuca1-6)GlcNAcb-Sp19	48815.2	41158.5	2337.06	15.841	6.58253	13.7713		15.575	15.3289	11.1905	6.64386	6.64386	6.64386		0.246142	4.13842	4.54662	0	0
ConA	575	GlcNAc ext 2 arms+F	GlcNAcb1-3Galb1-4GlcNAcb1-2Mana1-6(GlcNAcb1-3Galb1-4GlcNAcb1-2Mana1-3)Manb1-4GlcNAcb1-4(Fuca1-6)GlcNAcb-Sp24	45610.5	37581	5449.64	175.373	52.0719	34.3192		15.4771	15.1977	12.4119	7.45428	6.64386	6.64386		0.279363	2.78577	4.95766	0.810425	0
ConA	579	GlcNAc ext 2 arms+F	GlcNAcb1-3Galb1-4GlcNAcb1-3Galb1-4GlcNAcb1-3Galb1-4GlcNAcb1-2Mana1-6(GlcNAcb1-3Galb1-4GlcNAcb1-3Galb1-4GlcNAcb1-3Galb1-4GlcNAcb1-2Mana1-3)Manb1-4GlcNAcb1-4(Fuca1-6)GlcNAcb-Sp24	48324.5	30955.2	1858.74	-6.26565	-3.04288	21.1597		15.5605	14.9179	10.8601	6.64386	6.64386	6.64386		0.642576	4.05778	4.21625	0	0
ConA	577	GlcNAc ext 2 arms+F	GlcNAcb1-3Galb1-4GlcNAcb1-3Galb1-4GlcNAcb1-2Mana1-6(GlcNAcb1-3Galb1-4GlcNAcb1-3Galb1-4GlcNAcb1-2Mana1-3)Manb1-4GlcNAcb1-4(Fuca1-6)GlcNAcb-Sp24	44745.7	27252.2	2793.38	-13.8965	1.32645	22.6159		15.4495	14.7341	11.4478	6.64386	6.64386	6.64386		0.715374	3.28629	4.80394	0	0
ConA	541	GlcNAc ext 2 arms1	GlcNAcb1-3Galb1-4GlcNAcb1-2Mana1-6(GlcNAcb1-3Galb1-4GlcNAcb1-2Mana1-3)Manb1-4GlcNAcb1-4GlcNAcb-Sp25	40426.7	33117.8	5180.2	152.544	114.839	34.8336		15.303	15.0153	12.3388	7.25308	6.84347	6.64386		0.287701	2.67653	5.08572	0.409607	0.199614
ConA	540	GlcNAc ext 2 arms1	GlcNAcb1-3Galb1-4GlcNAcb1-2Mana1-6(GlcNAcb1-3Galb1-4GlcNAcb1-2Mana1-3)Manb1-4GlcNAcb1-4GlcNAcb-Sp12	49090.1	32717.3	4660.19	0.108375	-19.0708	-33.8743		15.5831	14.9978	12.1862	6.64386	6.64386	6.64386		0.58538	2.81159	5.54232	0	0
ConA	547	GlcNAc ext 2 arms2	GlcNAcb1-3Galb1-4GlcNAcb1-3Galb1-4GlcNAcb1-2Mana1-6(GlcNAcb1-3Galb1-4GlcNAcb1-3Galb1-4GlcNAcb1-2Mana1-3)Manb1-4GlcNAcb1-4GlcNAcb-Sp25	43817	28654.5	2767.56	4.6806	-3.38795	1.49582		15.4192	14.8065	11.4344	6.64386	6.64386	6.64386		0.612732	3.37207	4.79054	0	0
ConA	546	GlcNAc ext 2 arms2	GlcNAcb1-3Galb1-4GlcNAcb1-3Galb1-4GlcNAcb1-2Mana1-6(GlcNAcb1-3Galb1-4GlcNAcb1-3Galb1-4GlcNAcb1-2Mana1-3)Manb1-4GlcNAcb1-4GlcNAcb-Sp12	11948.6	3213.57	332.434	70.2181	80.2089	109.861		13.5446	11.65	8.37692	6.64386	6.64386	6.77953		1.89459	3.27304	1.73307	0	-0.135675
ConA	550	GlcNAc ext 2 arms3	GlcNAcb1-3Galb1-4GlcNAcb1-3Galb1-4GlcNAcb1-3Galb1-4GlcNAcb1-2Mana1-6(GlcNAcb1-3Galb1-4GlcNAcb1-3Galb1-4GlcNAcb1-3Galb1-4GlcNAcb1-2Mana1-3)Manb1-4GlcNAcb1-4GlcNAcb-Sp25	40662.4	30169.3	784.068	3.30203	3.95815	9.24803		15.3114	14.8808	9.61483	6.64386	6.64386	6.64386		0.430613	5.26596	2.97098	0	0
ConA	588	GlcNAc ext 3 arms+F	GlcNAcb1-3Galb1-4GlcNAcb1-3Galb1-4GlcNAcb1-3Galb1-4GlcNAcb1-3Galb1-4GlcNAcb1-6(GlcNAcb1-3Galb1-4GlcNAcb1-3Galb1-4GlcNAcb1-3Galb1-4GlcNAcb1-3Galb1-4GlcNAb1-2)Mana1-6(GlcNAcb1-3Galb1-4GlcNAcb1-3Galb1-4GlcNAcb1-3Galb1-4GlcNAcb1-3Galb1-4GlcNAcb1-2Mana1-3)Manb	213.876	151.35	126.617	0.5501	-2.74468	19.682		7.74063	7.24175	6.98433	6.64386	6.64386	6.64386		0.49888	0.257419	0.340473	0	0
ConA	584	GlcNAc ext 3 arms+F	GlcNAcb1-3Galb1-4GlcNAcb1-3Galb1-4GlcNAcb1-6(GlcNAcb1-3Galb1-4GlcNAcb1-3Galb1-4GlcNAb1-2)Mana1-6(GlcNAcb1-3Galb1-4GlcNAcb1-3Galb1-4GlcNAcb1-2Mana1-3)Manb1-4GlcNAcb1-4(Fuca1-6)GlcNAcb-Sp24	465.058	129.366	55.4675	6.75058	0.03085	7.58135		8.86127	7.01531	6.64386	6.64386	6.64386	6.64386		1.84595	0.371456	0	0	0
ConA	586	GlcNAc ext 3 arms+F	GlcNAcb1-3Galb1-4GlcNAcb1-3Galb1-4GlcNAcb1-3Galb1-4GlcNAcb1-6(GlcNAcb1-3Galb1-4GlcNAcb1-3Galb1-4GlcNAcb1-3Galb1-4GlcNAb1-2)Mana1-6(GlcNAcb1-3Galb1-4GlcNAcb1-3Galb1-4GlcNAcb1-3Galb1-4GlcNAcb1-2Mana1-3)Manb1-4GlcNAcb1-4(Fuca1-6)GlcNAcb-Sp24	991.474	-98.4717	58.8797	-2.84375	-18.7802	23.2809		9.95343	6.64386	6.64386	6.64386	6.64386	6.64386		3.30957	0	0	0	0
ConA	559	GlcNAc ext 3 arms1	GlcNAcb1-3Galb1-4GlcNAcb1-6(GlcNAcb1-3Galb1-4GlcNAcb1-2)Mana1-6(GlcNAcb1-3Galb1-4GlcNAcb1-2)Man a1-3)Manb1-4GlcNAcb1-4GlcNAc-Sp24	983.909	595.895	130.445	20.0643	5.39497	8.42282		9.94238	9.21891	7.02729	6.64386	6.64386	6.64386		0.723467	2.19162	0.383438	0	0
ConA	565	GlcNAc ext 3 arms4	GlcNAcb1-3Galb1-4GlcNAcb1-3Galb1-4GlcNAcb1-3Galb1-4GlcNAcb1-3Galb1-4GlcNAcb1-2Mana1-6(GlcNAcb1-3Galb1-4GlcNAcb1-3Galb1-4GlcNAcb1-3Galb1-4GlcNAcb1-3Galb1-4GlcNAcb1-2Mana1-3)Manb1-4GlcNAcb1-4GlcNAcb-Sp25	39454.7	35255.7	1397.92	16.1018	1.51655	17.9578		15.2679	15.1056	10.4491	6.64386	6.64386	6.64386		0.162339	4.6565	3.80521	0	0
ConA	342	GlcNAca1-4Galb like	GlcNAca1-4Galb1-4GlcNAcb1-3Galb1-4Glcb-Sp0	600.892	139.148	45.3455	4.75063	1.55297	-5.7637		9.23096	7.12048	6.64386	6.64386	6.64386	6.64386		2.11048	0.476623	0	0	0
ConA	340	GlcNAca1-4Galb like	GlcNAca1-4Galb1-4GlcNAcb-Sp0	881.149	136.578	57.2645	21.8217	4.98705	-8.97508		9.78324	7.09358	6.64386	6.64386	6.64386	6.64386		2.68966	0.449724	0	0	0
ConA	341	GlcNAca1-4Galb like	GlcNAca1-4Galb1-3GlcNAcb-Sp0	-33.2624	-2.88163	32.9617	0.5055	-1.96647	-6.17158		6.64386	6.64386	6.64386	6.64386	6.64386	6.64386		0	0	0	0	0
ConA	345	GlcNAca1-4Galb like	GlcNAca1-4Galb1-3GalNAc-Sp14	-5.06098	-34.2496	117.379	7.7515	-1.2017	1.02152		6.64386	6.64386	6.87503	6.64386	6.64386	6.64386		0	-0.231176	0.231176	0	0
ConA	16	GlcNAc-b	GlcNAcb-Sp0	-36.2673	-10.6267	61.3504	20.2711	10.3092	14.7662		6.64386	6.64386	6.64386	6.64386	6.64386	6.64386		0	0	0	0	0
ConA	17	GlcNAc-b	GlcNAcb-Sp8	-15.5476	-30.8243	35.3614	4.5029	-1.02147	7.9372		6.64386	6.64386	6.64386	6.64386	6.64386	6.64386		0	0	0	0	0
ConA	47	GlcNAcb(6Su)	(6S)GlcNAcb-Sp8	-23.0371	-20.9455	33.9913	4.4805	-2.2611	2.4384		6.64386	6.64386	6.64386	6.64386	6.64386	6.64386		0	0	0	0	0
ConA	18	GlcNGc-b	GlcN(Gc)b-Sp8	-17.977	-11.3452	51.6275	-5.1702	8.31217	8.8664		6.64386	6.64386	6.64386	6.64386	6.64386	6.64386		0	0	0	0	0
ConA	537	Globo A	GalNAca1-3(Fuca1-2)Galb1-3GalNAcb1-3Gala1-4Galb1-4Glc-Sp21	-221.318	-99.0126	3.60373	-26.1876	-15.0501	-2.49518		6.64386	6.64386	6.64386	6.64386	6.64386	6.64386		0	0	0	0	0
ConA	60	Globo H	Fuca1-2Galb1-3GalNAcb1-3Gala1-4Galb1-4Glcb-Sp9	-3.91048	-43.0553	26.4401	14.5284	-10.7578	5.45833		6.64386	6.64386	6.64386	6.64386	6.64386	6.64386		0	0	0	0	0
ConA	145	GM1a	Galb1-3GalNAcb1-4(Neu5Aca2-3)Galb1-4Glcb-Sp0	-2.52955	-67.9437	20.0321	-4.31525	-1.3733	3.43455		6.64386	6.64386	6.64386	6.64386	6.64386	6.64386		0	0	0	0	0
ConA	234	GM2	GalNAcb1-4(Neu5Aca2-3)Galb1-4Glcb-Sp0	-3.28142	-8.39132	28.5979	2.77312	6.10127	7.95853		6.64386	6.64386	6.64386	6.64386	6.64386	6.64386		0	0	0	0	0
ConA	264	GM3	Neu5Aca2-3Galb1-4Glcb-Sp0	-49.6445	24.0476	5.71017	0.89215	19.0885	5.79883		6.64386	6.64386	6.64386	6.64386	6.64386	6.64386		0	0	0	0	0
ConA	265	GM3	Neu5Aca2-3Galb1-4Glcb-Sp8	-53.5688	-8.88295	22.4458	12.4234	6.21387	13.9651		6.64386	6.64386	6.64386	6.64386	6.64386	6.64386		0	0	0	0	0
ConA	285	GM3 (Gc)	Neu5Gca2-3Galb1-4Glcb-Sp0	-159.489	-74.949	5.52343	3.98018	0.171975	4.42122		6.64386	6.64386	6.64386	6.64386	6.64386	6.64386		0	0	0	0	0
ConA	246	GM3-di	Neu5Aca2-3Galb-Sp8	-12.4717	9.533	5.74638	2.55722	3.08422	7.51927		6.64386	6.64386	6.64386	6.64386	6.64386	6.64386		0	0	0	0	0
ConA	183	GNLacNAc	GlcNAcb1-3Galb1-4GlcNAcb-Sp0	-3.3391	18.3323	41.7742	3.60985	-5.7695	11.0351		6.64386	6.64386	6.64386	6.64386	6.64386	6.64386		0	0	0	0	0
ConA	184	GNLacNAc	GlcNAcb1-3Galb1-4GlcNAcb-Sp8	-13.0181	4.58323	60.2644	1.1284	-0.79755	-2.24717		6.64386	6.64386	6.64386	6.64386	6.64386	6.64386		0	0	0	0	0
ConA	453	GQ1b	Neu5Aca2-8Neu5Aca2-3Galb1-3GalNAcb1-4(Neu5Aca2-8Neu5Aca2-3)Galb1-4Glcb-Sp0	-224.915	-127.763	27.1958	-13.306	-6.4839	-7.61557		6.64386	6.64386	6.64386	6.64386	6.64386	6.64386		0	0	0	0	0
ConA	226	GQ2	GalNAcb1-4(Neu5Aca2-8Neu5Aca2-8Neu5Aca2-8Neu5Aca2-3)Galb1-4Glcb-Sp0	-67.7126	-15.9689	95.9293	12.3849	7.45838	-3.791		6.64386	6.64386	6.64386	6.64386	6.64386	6.64386		0	0	0	0	0
ConA	574	GT1a	Neu5Aca2-8Neu5Aca2-3Galb1-3GalNAcb1-4(Neu5Aca2-3)Galb1-4Glc-Sp21	-71.2588	-73.081	10.9148	-5.72028	-10.7809	-4.36827		6.64386	6.64386	6.64386	6.64386	6.64386	6.64386		0	0	0	0	0
ConA	611	GT1c	Galb1-3GalNAcb1-4(Neu5Aca2-8Neu5Aca2-8Neu5Aca2-3)Galb1-4Glcb-Sp21	-55.5745	7.7835	72.3157	17.1976	30.0032	21.8174		6.64386	6.64386	6.64386	6.64386	6.64386	6.64386		0	0	0	0	0
ConA	227	GT2	GalNAcb1-4(Neu5Aca2-8Neu5Aca2-8Neu5Aca2-3)Galb1-4Glcb-Sp0	-20.9145	-38.364	69.3017	10.5747	19.8249	21.1765		6.64386	6.64386	6.64386	6.64386	6.64386	6.64386		0	0	0	0	0
ConA	228	GT3	Neu5Aca2-8Neu5Aca2-8Neu5Aca2-3Galb1-4Glcb-Sp0	-56.8729	-81.5425	158.022	-3.6937	-5.9631	-0.017075		6.64386	6.64386	7.30399	6.64386	6.64386	6.64386		0	-0.66013	0.66013	0	0
ConA	118	iGb3	Gala1-3Galb1-4Glc-Sp10	22.4078	-21.4296	42.6678	3.70497	-6.75807	9.2649		6.64386	6.64386	6.64386	6.64386	6.64386	6.64386		0	0	0	0	0
ConA	383	iLNO	Galb1-3GlcNacb1-3Galb1-4GlcNacb1-6(Galb1-3GlcNacb1-3)Galb1-4Glcb-Sp0	-92.319	32.4935	3.1359	-1.77157	1.3448	-9.23782		6.64386	6.64386	6.64386	6.64386	6.64386	6.64386		0	0	0	0	0
ConA	198	isomaltose	Glca1-6Glca1-6Glcb-Sp8	32.3686	-3.20702	52.4619	10.3511	12.6922	6.49367		6.64386	6.64386	6.64386	6.64386	6.64386	6.64386		0	0	0	0	0
ConA	27	Lac(3’3DiSu)	(3S)Galb1-4(6S)Glcb-Sp8	71.4464	9.56303	27.3899	6.93507	-0.9432	-7.5464		6.64386	6.64386	6.64386	6.64386	6.64386	6.64386		0	0	0	0	0
ConA	26	Lac(3’6DiSu-)	(3S)Galb1-4(6S)Glcb-Sp0	105.606	0.447675	82.5298	8.47573	6.6236	2.03737		6.72254	6.64386	6.64386	6.64386	6.64386	6.64386		0.0786884	0	0	0	0
ConA	25	Lac(3'su-)	(3S)Galb1-4Glcb-Sp8	264.204	-31.1887	138.256	1.92052	1.65575	4.3219		8.04551	6.64386	7.1112	6.64386	6.64386	6.64386		1.40165	-0.467344	0.467344	0	0
ConA	45	Lac(6’6Di-Su)	(6S)Galb1-4(6S)Glcb-Sp8	348.267	6.03688	67.1459	13.9595	7.57942	5.1642		8.44405	6.64386	6.64386	6.64386	6.64386	6.64386		1.8002	0	0	0	0
ConA	157	Lac(6Su)	Galb1-4(6S)Glcb-Sp8	4.87882	34.2616	44.2887	5.96585	19.8857	-2.495		6.64386	6.64386	6.64386	6.64386	6.64386	6.64386		0	0	0	0	0
ConA	156	Lac(6Su)	Galb1-4(6S)Glcb-Sp0	-17.4387	-75.6515	12.6474	-1.37958	11.343	4.40263		6.64386	6.64386	6.64386	6.64386	6.64386	6.64386		0	0	0	0	0
ConA	42	Lac(6'Su)	(6S)Galb1-4Glcb-Sp0	-19.8913	32.9981	30.0995	2.01298	6.65525	10.423		6.64386	6.64386	6.64386	6.64386	6.64386	6.64386		0	0	0	0	0
ConA	43	Lac(6'Su)	(6S)Galb1-4Glcb-Sp8	-7.28137	6.70927	38.7032	3.1899	1.14113	1.9129		6.64386	6.64386	6.64386	6.64386	6.64386	6.64386		0	0	0	0	0
ConA	169	LacNAc	Galb1-4GlcNAcb-Sp0	-34.6661	26.0351	64.4415	4.4688	-8.6071	20.1205		6.64386	6.64386	6.64386	6.64386	6.64386	6.64386		0	0	0	0	0
ConA	170	LacNAc	Galb1-4GlcNAcb-Sp8	332.293	-33.9739	4.02225	4.1291	-0.473875	2.33155		8.37631	6.64386	6.64386	6.64386	6.64386	6.64386		1.73246	0	0	0	0
ConA	161	LacNAc--	Galb1-4GlcNAcb1-3GalNAc-Sp14	-6.94173	17.4865	92.2914	10.7805	19.0061	9.58995		6.64386	6.64386	6.64386	6.64386	6.64386	6.64386		0	0	0	0	0
ConA	160	LacNAc--	Galb1-4GlcNAcb1-3GalNAca-Sp8	163.325	-8.0448	40.0997	1.3952	-0.158975	3.8306		7.3516	6.64386	6.64386	6.64386	6.64386	6.64386		0.707748	0	0	0	0
ConA	305	LacNAc--	Galb1-4GlcNAca1-6Galb1-4GlcNAcb-Sp0	91.9211	-12.3689	0.5251	-5.56337	-8.39602	8.17125		6.64386	6.64386	6.64386	6.64386	6.64386	6.64386		0	0	0	0	0
ConA	304	LacNAc--	GlcNAcb1-6(Galb1-4GlcNAcb1-3)Galb1-4GlcNAc-Sp0	227.829	-28.6225	2.18538	-10.4627	-7.15348	-5.83178		7.83181	6.64386	6.64386	6.64386	6.64386	6.64386		1.18795	0	0	0	0
ConA	306	LacNAc (1-6dimeric)	Galb1-4GlcNAcb1-6Galb1-4GlcNAcb-Sp0	-82.9543	-1.24492	0.274025	-0.13115	8.0227	-11.1575		6.64386	6.64386	6.64386	6.64386	6.64386	6.64386		0	0	0	0	0
ConA	164	LacNAc (dimeric)	Galb1-4GlcNAcb1-3Galb1-4GlcNAcb-Sp0	62.026	6.74263	-0.856325	9.17227	3.37588	7.30537		6.64386	6.64386	6.64386	6.64386	6.64386	6.64386		0	0	0	0	0
ConA	163	LacNAc (trimeric)	Galb1-4GlcNAcb1-3Galb1-4GlcNAcb1-3Galb1-4GlcNAcb-Sp0	-26.025	1.40905	-0.183225	-1.36552	2.76117	-1.2311		6.64386	6.64386	6.64386	6.64386	6.64386	6.64386		0	0	0	0	0
ConA	591	LacNAc dimeric (core 4)	Galb1-4GlcNAcb1-3Galb1-4GlcNAcb1-6(Galb1-3)GalNAca-Sp14	1.51697	26.6454	226.843	22.8469	27.1909	37.403		6.64386	6.64386	7.82555	6.64386	6.64386	6.64386		0	-1.1817	1.1817	0	0
ConA	590	LacNAc dimeric (core3)	Galb1-4GlcNAcb1-3Galb1-4GlcNAcb1-3GalNAca-Sp14	-143.976	-70.0165	162.578	14.7119	9.82822	73.9813		6.64386	6.64386	7.34499	6.64386	6.64386	6.64386		0	-0.701131	0.701131	0	0
ConA	576	LacNAc ext 2 arms+F	Galb1-4GlcNAcb1-3Galb1-4GlcNAcb1-2Mana1-6(Galb1-4GlcNAcb1-3Galb1-4GlcNAcb1-2Mana1-3)Manb1-4GlcNAcb1-4(Fuca1-6)GlcNAcb-Sp24	37709	41914.1	3353.67	97.2415	54.4688	9.03065		15.2026	15.3551	11.7115	6.64386	6.64386	6.64386		-0.152525	3.64362	5.06767	0	0
ConA	578	LacNAc ext 2 arms+F	Galb1-4GlcNAcb1-3Galb1-4GlcNAcb1-3Galb1-4GlcNAcb1-2Mana1-6(Galb1-4GlcNAcb1-3Galb1-4GlcNAcb1-3Galb1-4GlcNAcb1-2Mana1-3)Manb1-4GlcNAcb1-4(Fuca1-6)GlcNAcb-Sp24	42862.1	40080.3	2032.24	-8.24338	-8.63987	13.2543		15.3874	15.2906	10.9889	6.64386	6.64386	6.64386		0.0968114	4.30175	4.345	0	0
ConA	580	LacNAc ext 2 arms+F	Galb1-4GlcNAcb1-3Galb1-4GlcNAcb1-3Galb1-4GlcNAcb1-3Galb1-4GlcNAcb1-2Mana1-6(Galb1-4GlcNAcb1-3Galb1-4GlcNAcb1-3Galb1-4GlcNAcb1-3Galb1-4GlcNAcb1-2Mana1-3)Manb1-4GlcNAcb1-4(Fuca1-6)GlcNAcb-Sp24	40355	33289.3	1201.74	-1.9187	-5.34417	47.3274		15.3005	15.0228	10.2309	6.64386	6.64386	6.64386		0.277689	4.79186	3.58705	0	0
ConA	582	LacNAc ext 2 arms+F	Galb1-4GlcNAcb1-3Galb1-4GlcNAcb1-3Galb1-4GlcNAcb1-3Galb1-4GlcNAcb1-3Galb1-4GlcNAcb1-2Mana1-6(Galb1-4GlcNAcb1-3Galb1-4GlcNAcb1-3Galb1-4GlcNAcb1-3Galb1-4GlcNAcb1-3Galb1-4GlcNAcb1-2Mana1-3)Manb1-4GlcNAcb1-4(Fuca1-6)GlcNAcb-Sp19	45269.6	29651.4	1463.11	28.6355	21.7535	-6.43417		15.4663	14.8558	10.5148	6.64386	6.64386	6.64386		0.610445	4.34099	3.87097	0	0
ConA	543	LacNAc ext 2 arms2	Galb1-4GlcNAcb1-3Galb1-4GlcNAcb1-2Mana1-6(Galb1-4GlcNAcb1-3Galb1-4GlcNAcb1-2Mana1-3)Manb1-4GlcNAcb1-4GlcNAcb-Sp24	38920.3	30325.8	3546.4	77.5578	5.23402	25.0977		15.2482	14.8883	11.7921	6.64386	6.64386	6.64386		0.359981	3.09612	5.14828	0	0
ConA	542	LacNAc ext 2 arms2	Galb1-4GlcNAcb1-3Galb1-4GlcNAcb1-2Mana1-6(Galb1-4GlcNAcb1-3Galb1-4GlcNAcb1-2Mana1-3)Manb1-4GlcNAcb1-4GlcNAcb-Sp12	1965.59	460.187	375.158	68.8739	108.38	98.1416		10.9407	8.84608	8.55135	6.64386	6.75995	6.64386		2.09467	0.294723	1.9075	-0.116096	0.116096
ConA	549	LacNAc ext 2 arms3	Galb1-4GlcNAcb1-3Galb1-4GlcNAcb1-3Galb1-4GlcNAcb1-2Mana1-6(Galb1-4GlcNAcb1-3Galb1-4GlcNAcb1-3Galb1-4GlcNAcb1-2Mana1-3)Manb1-4GlcNAcb1-4GlcNAcb-Sp24	49497.3	35989	2591.86	24.1186	-3.47075	8.69025		15.5951	15.1353	11.3398	6.64386	6.64386	6.64386		0.459793	3.7955	4.69592	0	0
ConA	548	LacNAc ext 2 arms3	Galb1-4GlcNAcb1-3Galb1-4GlcNAcb1-3Galb1-4GlcNAcb1-2Mana1-6(Galb1-4GlcNAcb1-3Galb1-4GlcNAcb1-3Galb1-4GlcNAcb1-2Mana1-3)Manb1-4GlcNAcb1-4GlcNAcb-Sp12	34378.4	11756.8	541.278	114.278	133.043	186.654		15.0692	13.5212	9.08023	6.8364	7.05575	7.54422		1.54801	4.44098	2.24383	-0.21935	-0.488473
ConA	551	LacNAc ext 2 arms4	Galb1-4GlcNAcb1-3Galb1-4GlcNAcb1-3Galb1-4GlcNAcb1-3Galb1-4GlcNAcb1-2Mana1-6(Galb1-4GlcNAcb1-3Galb1-4GlcNAcb1-3Galb1-4GlcNAcb1-3Galb1-4GlcNAcb1-2Mana1-3)Manb1-4GlcNAcb1-4GlcNAcb-Sp25	54931.5	31027.3	956.213	12.791	19.8196	15.0719		15.7453	14.9213	9.90119	6.64386	6.64386	6.64386		0.824094	5.02006	3.25733	0	0
ConA	566	LacNAc ext 2 arms5	Galb1-4GlcNAcb1-3Galb1-4GlcNAcb1-3Galb1-4GlcNAcb1-3Galb1-4GlcNAcb1-3Galb1-4GlcNAcb1-2Mana1-6(Galb1-4GlcNAcb1-3Galb1-4GlcNAcb1-3Galb1-4GlcNAcb1-3Galb1-4GlcNAcb1-3Galb1-4GlcNAcb1-2Mana1-3)Manb1-4GlcNAcb1-4GlcNAcb-Sp25	41498.1	36021.7	1851	29.1254	4.81237	5.16405		15.3408	15.1366	10.8541	6.64386	6.64386	6.64386		0.204179	4.28249	4.21023	0	0
ConA	569	LacNAc ext 2 arms6	Galb1-4GlcNAcb1-3Galb1-4GlcNAcb1-3Galb1-4GlcNAcb1-3Galb1-4GlcNAcb1-3Galb1-4GlcNAcb1-3Galb1-4GlcNAcb1-2Mana1-6(Galb1-4GlcNAcb1-3Galb1-4GlcNAcb1-3Galb1-4GlcNAcb1-3Galb1-4GlcNAcb1-3Galb1-4GlcNAcb1-3Galb1-4GlcNAcb1-2Mana1-3)Manb1-4GlcNAcb1-4GlcNAcb-Sp25	43077.7	24932.9	818.155	12.2183	5.6476	8.04585		15.3947	14.6058	9.67623	6.64386	6.64386	6.64386		0.788891	4.92953	3.03237	0	0
ConA	589	LacNAc ext 3 arms+F	Galb1-4GlcNAcb1-3Galb1-4GlcNAcb1-3Galb1-4GlcNAcb1-3Galb1-4GlcNAcb1-3Galb1-4GlcNAcb1-6(Galb1-4GlcNAcb1-3Galb1-4GlcNAcb1-3Galb1-4GlcNAcb1-3Galb1-4GlcNAcb1-3Galb1-4GlcNAb1-2)Mana1-6(Galb1-4GlcNAcb1-3Galb1-4GlcNAcb1-3Galb1-4GlcNAcb1-3Galb1-4GlcNAcb1-3Galb1-4G	1136.3	735.539	159.124	5.78833	32.5662	-3.9418		10.1501	9.52266	7.31401	6.64386	6.64386	6.64386		0.627474	2.20865	0.670149	0	0
ConA	587	LacNAc ext 3 arms+F	Galb1-4GlcNAcb1-3Galb1-4GlcNAcb1-3Galb1-4GlcNAcb1-3Galb1-4GlcNAcb1-6(Galb1-4GlcNAcb1-3Galb1-4GlcNAcb1-3Galb1-4GlcNAcb1-3Galb1-4GlcNAb1-2)Mana1-6(Galb1-4GlcNAcb1-3Galb1-4GlcNAcb1-3Galb1-4GlcNAcb1-3Galb1-4GlcNAcb1-2Mana1-3)Manb1-4GlcNAcb1-4(Fuca1-6)GlcNAcb-	76.4659	243.807	136.534	7.28713	-3.4434	4.0645		6.64386	7.92959	7.09312	6.64386	6.64386	6.64386		-1.28574	0.836473	0.449264	0	0
ConA	583	LacNAc ext 3 arms+F	Galb1-4GlcNAcb1-3Galb1-4GlcNAcb1-6(Galb1-4GlcNAcb1-3Galb1-4GlcNAb1-2)Mana1-6(Galb1-4GlcNAcb1-3Galb1-4GlcNAcb1-2Mana1-3)Manb1-4GlcNAcb1-4(Fuca1-6)GlcNAcb-Sp24	7.3784	29.8165	118.445	-0.9014	-3.201	27.4442		6.64386	6.64386	6.88807	6.64386	6.64386	6.64386		0	-0.244213	0.244213	0	0
ConA	585	LacNAc ext 3 arms+F	Galb1-4GlcNAcb1-3Galb1-4GlcNAcb1-3Galb1-4GlcNAcb1-6(Galb1-4GlcNAcb1-3Galb1-4GlcNAcb1-3Galb1-4GlcNAb1-2)Mana1-6(Galb1-4GlcNAcb1-3Galb1-4GlcNAcb1-3Galb1-4GlcNAcb1-2Mana1-3)Manb1-4GlcNAcb1-4(Fuca1-6)GlcNAcb-Sp24	130.207	0.8819	118.254	-1.39655	22.9119	9.95318		7.02466	6.64386	6.88575	6.64386	6.64386	6.64386		0.380803	-0.241893	0.241893	0	0
ConA	560	LacNAc ext 3 arms2	Galb1-4GlcNAcb1-3Galb1-4GlcNAcb1-6(Galb1-4GlcNAcb1-3Galb1-4GlcNAcb1-2)Mana1-6(Galb1-4GlcNAcb1-3Galb1-4GlcNAcb1-2Mana1-3)Mana1-4GlcNAcb1-4GlcNAc-Sp24	2349.17	1319.27	780.647	2.52165	-5.58085	-0.631575		11.1979	10.3655	9.60853	6.64386	6.64386	6.64386		0.832414	0.756993	2.96467	0	0
ConA	35	LacNAc(3’6DiSu)	(3S)Galb1-4(6S)GlcNAcb-Sp8	-43.7227	115.429	-10.1671	6.9763	-1.2191	-6.50755		6.64386	6.85087	6.64386	6.64386	6.64386	6.64386		-0.207009	0.207009	0	0	0
ConA	34	LacNAc(3’6DiSu)	(3S)Galb1-4(6S)GlcNAcb-Sp0	105.442	-42.7267	133.49	-2.93633	-6.3799	-2.691		6.72031	6.64386	7.06059	6.64386	6.64386	6.64386		0.0764537	-0.416732	0.416732	0	0
ConA	22	LacNAc(3'6'6tri-su-)	6S(3S)Galb1-4(6S)GlcNAcb-Sp0	1.72212	-33.8184	111.783	2.18325	-1.59275	-15.6207		6.64386	6.64386	6.80455	6.64386	6.64386	6.64386		0	-0.160696	0.160696	0	0
ConA	23	LacNAc(3'6'di-su-)	6S(3S)Galb1-4GlcNAcb-Sp0	-47.5228	-14.3382	42.3016	-3.45985	-2.99187	-9.2838		6.64386	6.64386	6.64386	6.64386	6.64386	6.64386		0	0	0	0	0
ConA	36	LacNAc(3'Su)	(3S)Galb1-4GlcNAcb-Sp0	-69.7088	4.26738	24.6049	16.4263	-3.68722	-7.6847		6.64386	6.64386	6.64386	6.64386	6.64386	6.64386		0	0	0	0	0
ConA	37	LacNAc(3'Su)	(3S)Galb1-4GlcNAcb-Sp8	-35.4859	2.06792	52.9969	-0.2031	-7.39842	10.176		6.64386	6.64386	6.64386	6.64386	6.64386	6.64386		0	0	0	0	0
ConA	39	LacNac(4'6'diSu)	(6S)(4S)Galb1-4GlcNAcb-Sp0	174.727	-9.08655	234.408	10.7399	4.13415	1.01237		7.44896	6.64386	7.87288	6.64386	6.64386	6.64386		0.805099	-1.22902	1.22902	0	0
ConA	40	LacNAc(4'Su)	(4S)Galb1-4GlcNAcb-Sp8	-31.2749	39.4384	43.0437	-1.53645	-2.41352	1.78575		6.64386	6.64386	6.64386	6.64386	6.64386	6.64386		0	0	0	0	0
ConA	44	LacNAc(6'Su)	(6S)Galb1-4GlcNAcb-Sp8	-14.2008	-32.0762	27.695	-1.6492	4.812	4.47528		6.64386	6.64386	6.64386	6.64386	6.64386	6.64386		0	0	0	0	0
ConA	600	LacNAc-core1	Galb1-4GlcNAcb1-3Galb1-3GalNAca-Sp14	-143.9	-18.9348	-6.322	-12.4443	-14.6086	0.801825		6.64386	6.64386	6.64386	6.64386	6.64386	6.64386		0	0	0	0	0
ConA	294	LacNAc-LeC	Galb1-4GlcNAcb1-3Galb1-3GlcNAcb-Sp0	11.6887	-4.98915	175.07	-0.947525	3.37853	0.387		6.64386	6.64386	7.45179	6.64386	6.64386	6.64386		0	-0.807933	0.807933	0	0
ConA	162	LacNAc-LeX-LeX	Galb1-4GlcNAcb1-3Galb1-4(Fuca1-3)GlcNAcb1-3Galb1-4(Fuca1-3)GlcNAcb-Sp0	441.759	295.181	34.07	4.50195	-0.1591	4.8245		8.78712	8.20545	6.64386	6.64386	6.64386	6.64386		0.581662	1.5616	0	0	0
ConA	592	LacNAcs (core4)	Galb1-4GlcNAcb1-3Galb1-4GlcNAcb1-6(Galb1-4GlcNAcb1-3Galb1-4GlcNAcb1-3)GalNAca-Sp14	-136.681	23.3633	275.777	34.1485	21.9815	72.6454		6.64386	6.64386	8.10736	6.64386	6.64386	6.64386		0	-1.4635	1.4635	0	0
ConA	172	Lactose	Galb1-4Glcb-Sp0	1.98672	22.0367	15.9085	9.88737	7.0326	15.8115		6.64386	6.64386	6.64386	6.64386	6.64386	6.64386		0	0	0	0	0
ConA	173	Lactose	Galb1-4Glcb-Sp8	17.6339	18.3328	42.6577	1.54472	5.04608	12.6402		6.64386	6.64386	6.64386	6.64386	6.64386	6.64386		0	0	0	0	0
ConA	564	LDN (dimeric)	GalNAcb1-4GlcNAcb1-3GalNAcb1-4GlcNAcb-Sp0	-131.34	-120.59	89.3677	-16.1303	-18.2263	-9.52037		6.64386	6.64386	6.64386	6.64386	6.64386	6.64386		0	0	0	0	0
ConA	100	LDN, Lac-di-Nac,	GalNAcb1-4GlcNAcb-Sp8	0.1976	-3.5473	8.13053	-3.0814	-4.6066	1.0938		6.64386	6.64386	6.64386	6.64386	6.64386	6.64386		0	0	0	0	0
ConA	99	LDN, Lac-di-Nac,	GalNAcb1-4GlcNAcb-Sp0	-42.3801	-11.7909	71.8643	-3.323	-4.537	-5.09692		6.64386	6.64386	6.64386	6.64386	6.64386	6.64386		0	0	0	0	0
ConA	529	LDN-Man	GalNAcb1-4GlcNAcb1-2Mana-Sp0	5787.27	685.065	45.6224	0.001025	2.04898	11.4747		12.4987	9.4201	6.64386	6.64386	6.64386	6.64386		3.07857	2.77624	0	0	0
ConA	380	LDN--Man3	GalNAcb1-4GlcNAcb1-2Mana1-6(GalNAcb1-4GlcNAcb1-2Mana1-3)Manb1-4GlcNAcb1-4GlcNAc-Sp12	21835.4	9725.1	1631.19	306.662	288.502	152.614		14.4144	13.2475	10.6717	8.2605	8.17244	7.25374		1.16688	2.57579	2.4112	0.0880684	0.918694
ConA	129	LeA	Galb1-3(Fuca1-4)GlcNAc-Sp0	-42.9162	-9.6069	43.7635	-9.64322	-3.5733	15.1904		6.64386	6.64386	6.64386	6.64386	6.64386	6.64386		0	0	0	0	0
ConA	130	LeA	Galb1-3(Fuca1-4)GlcNAc-Sp8	-139.108	-20.8193	13.4579	-9.499	-4.82475	-2.8643		6.64386	6.64386	6.64386	6.64386	6.64386	6.64386		0	0	0	0	0
ConA	131	LeA	Fuca1-4(Galb1-3)GlcNAcb-Sp8	-68.5537	-33.0558	29.4671	4.46123	-4.74997	4.27265		6.64386	6.64386	6.64386	6.64386	6.64386	6.64386		0	0	0	0	0
ConA	366	LeA--	Fuca1-4(Galb1-3)GlcNAcb1-2Mana1-6(Fuca1-4(Galb1-3)GlcNAcb1-2Mana1-3)Manb1-4GlcNAcb1-4(Fuca1-6)GlcNAcb-Sp22	41588	34344.5	11498.3	472.784	747.552	58.9914		15.3439	15.0678	13.4891	8.88504	9.54603	6.64386		0.27609	1.57865	4.6041	-0.660992	2.90217
ConA	534	LeA--	Fuca1-4(Galb1-3)GlcNAcb1-2 Mana-Sp0	-54.2195	-11.4044	62.648	11.8377	-2.18683	4.9357		6.64386	6.64386	6.64386	6.64386	6.64386	6.64386		0	0	0	0	0
ConA	491	LeA--	Galb1-3(Fuca1-4)GlcNAcb1-6GalNAca-Sp14	238.466	-103.434	44.095	-5.30655	-3.49405	18.6918		7.89764	6.64386	6.64386	6.64386	6.64386	6.64386		1.25378	0	0	0	0
ConA	28	LeA(3'su)	(3S)Galb1-3(Fuca1-4)GlcNAcb-Sp8	100.715	-3.64513	21.4495	3.33882	-4.56557	1.0545		6.65414	6.64386	6.64386	6.64386	6.64386	6.64386		0.0102847	0	0	0	0
ConA	278	LeA-LeA	Galb1-3(Fuca1-4)GlcNAcb1-3Galb1-3(Fuca1-4)GlcNAcb-Sp0	232.647	191.874	61.4432	4.84445	9.58108	-1.00735		7.862	7.58401	6.64386	6.64386	6.64386	6.64386		0.277988	0.940156	0	0	0
ConA	127	LeA-LeX	Galb1-3(Fuca1-4)GlcNAcb1-3Galb1-4(Fuca1-3)GlcNAcb-Sp0	-17.3097	-16.7081	8.19815	-6.14618	0.42115	-0.7243		6.64386	6.64386	6.64386	6.64386	6.64386	6.64386		0	0	0	0	0
ConA	61	LeB	Fuca1-2Galb1-3(Fuca1-4)GlcNAcb-Sp8	-6.5227	-9.48252	12.7173	1.40973	-2.44627	3.92897		6.64386	6.64386	6.64386	6.64386	6.64386	6.64386		0	0	0	0	0
ConA	474	LeB--	Fuca1-2Galb1-3(Fuca1-4)GlcNAcb1-2Mana1-6(Fuca1-2Galb1-3(Fuca1-4)GlcNAcb1-2Mana1-3)Manb1-4GlcNAcb1-4(Fuca1-6)GlcNAcb-Sp11-4(Fuca1-6)GlcNAcb-Sp19	8362.76	2698.71	622.907	5.25297	5.91307	14.6356		13.0298	11.3981	9.28287	6.64386	6.64386	6.64386		1.63171	2.11518	2.63902	0	0
ConA	376	LeB--	Fuca1-4(Fuca1-2Galb1-3)GlcNAcb1-2Mana1-3(Fuca1-4(Fuca1-2Galb1-3)GlcNAcb1-2Mana1-3)Manb1-4GlcNAcb1-4GlcNAcb-Sp19	1406.32	675.724	194.948	9.06667	14.1939	38.8619		10.4577	9.40029	7.60695	6.64386	6.64386	6.64386		1.05742	1.79334	0.96309	0	0
ConA	386	LeB/LeX	Galb1-4(Fuca1-3)GlcNAcb1-6(Fuca1-4(Fuca1-2Galb1-3)GlcNAcb1-3)Galb1-4Glc-Sp21	120.048	16.2562	7.06813	-2.6751	4.10577	8.87357		6.90746	6.64386	6.64386	6.64386	6.64386	6.64386		0.263607	0	0	0	0
ConA	150	LeC	Galb1-3GlcNAcb-Sp0	-34.3786	-12.035	23.897	2.9736	8.74158	1.97362		6.64386	6.64386	6.64386	6.64386	6.64386	6.64386		0	0	0	0	0
ConA	151	LeC	Galb1-3GlcNAcb-Sp8	-48.0991	-14.9012	24.8887	-10.0153	0.7725	9.18935		6.64386	6.64386	6.64386	6.64386	6.64386	6.64386		0	0	0	0	0
ConA	355	LeC--	Galb1-3GlcNAcb1-2Mana1-6(Galb1-3GlcNAcb1-2Mana1-3)Manb1-4GlcNAcb1-4(Fuca1-6)GlcNAcb-Sp22	40352.9	32915.1	8079.3	556.557	481.008	63.1197		15.3004	15.0065	12.98	9.12039	8.90992	6.64386		0.293924	2.02645	3.85963	0.210468	2.26606
ConA	429	LeC--	Galb1-3GlcNAcb1-6(Galb1-3GlcNAcb1-2)Mana1-6(Galb1-3GlcNAcb1-2Mana1-3)Manb1-4GlcNAcb1-4GlcNAcb-Sp19	8775.75	3987.25	615.838	8.47712	5.67108	4.23747		13.0993	11.9612	9.26641	6.64386	6.64386	6.64386		1.13813	2.69477	2.62255	0	0
ConA	407	LeC--	Galb1-3GlcNAcb1-6Galb1-4GlcNAcb-Sp0	-115.487	-4.96498	-3.592	-5.86647	-3.6044	-2.95842		6.64386	6.64386	6.64386	6.64386	6.64386	6.64386		0	0	0	0	0
ConA	408	LeC--	Galb1-3GlcNAca1-6Galb1-4GlcNAcb-Sp0	-146.675	-9.54502	9.75947	-0.718175	-2.0743	3.35167		6.64386	6.64386	6.64386	6.64386	6.64386	6.64386		0	0	0	0	0
ConA	392	LeC--	Galb1-3GlcNAcb1-3GalNAca-Sp14	-22.5022	-12.7148	10.575	6.27753	-2.00842	8.25692		6.64386	6.64386	6.64386	6.64386	6.64386	6.64386		0	0	0	0	0
ConA	325	LeC---	Galb1-3GlcNAcb1-2Mana1-6(Galb1-3GlcNAcb1-2Mana1-3)Manb1-4GlcNAcb1-4GlcNAcb-Sp19	37875.9	36711.5	7436.98	491.68	661.775	109.442		15.209	15.1639	12.8605	8.94158	9.3702	6.77402		0.0450494	2.30344	3.91893	-0.428621	2.59618
ConA	552	LeC ext 2 arms1	Galb1-3GlcNAcb1-3Galb1-4GlcNAcb1-2Mana1-6(Galb1-3GlcNAcb1-3Galb1-4GlcNAcb1-2Mana1-3)Manb1-4GlcNAcb1-4GlcNAc-Sp25	40350	34748.6	4392.87	112.348	39.5585	3.96297		15.3003	15.0847	12.1009	6.81183	6.64386	6.64386		0.215614	2.98372	5.28912	0.167972	0
ConA	573	LeC ext 3 arms+F	Galb1-3GlcNAcb1-3Galb1-4GlcNAcb1-6(Galb1-3GlcNAcb1-3Galb1-4GlcNAb1-2)Mana1-6(Galb1-3GlcNAcb1-3Galb1-4GlcNAcb1-2Mana1-3)Manb1-4GlcNAcb1-4(Fuca1-6)GlcNAcb-Sp24	11385.3	8916.7	1560.61	36.0487	24.7944	18.2653		13.4749	13.1223	10.6079	6.64386	6.64386	6.64386		0.352596	2.5144	3.96403	0	0
ConA	572	LeC ext 3 arms1	Galb1-3GlcNAcb1-3Galb1-4GlcNAcb1-3Galb1-4GlcNAcb1-6(Galb1-3GlcNAcb1-3Galb1-4GlcNAcb1-3Galb1-4GlcNAb1-2)Mana1-6(Galb1-3GlcNAcb1-3Galb1-4GlcNAcb1-3Galb1-4GlcNAcb1-2Mana1-3)Manb1-4GlcNAcb1-4(Fuca1-6)GlcNAcb-Sp24	9260.64	7038.33	1526.85	20.3352	44.1758	16.1087		13.1769	12.781	10.5763	6.64386	6.64386	6.64386		0.39588	2.20468	3.93249	0	0
ConA	477	LeC like	Galb1-3GlcNAcb1-2Mana1-6(GlcNAcb1-4)(Galb1-3GlcNAcb1-2Mana1-3)Manb1-4GlcNAcb1-4GlcNAcb-Sp21	35401.4	18607.2	3554.19	7.546	43.9465	2.074		15.1115	14.1836	11.7953	6.64386	6.64386	6.64386		0.92795	2.38827	5.15145	0	0
ConA	525	LeC like	Galb1-3GlcNAcb1-2Mana-Sp0	4922.5	685.151	108.917	1.29068	-1.0527	2.23525		12.2652	9.42028	6.76708	6.64386	6.64386	6.64386		2.8449	2.6532	0.123227	0	0
ConA	489	LeC like	Galb1-3GlcNAcb1-6GalNAca-Sp14	-33.621	-30.6358	-5.98142	-0.022125	-4.0771	-6.4686		6.64386	6.64386	6.64386	6.64386	6.64386	6.64386		0	0	0	0	0
ConA	510	LeC like	Galb1-3GlcNAca1-3Galb1-4GlcNAcb-Sp8	-96.0379	-42.0565	12.1388	-1.95635	-3.28178	-11.478		6.64386	6.64386	6.64386	6.64386	6.64386	6.64386		0	0	0	0	0
ConA	31	LeC(3’su)	(3S)Galb1-3GlcNAcb-Sp8	-58.4171	-12.6072	-7.87333	-2.03593	8.46317	4.0098		6.64386	6.64386	6.64386	6.64386	6.64386	6.64386		0	0	0	0	0
ConA	30	LeC(3’su)	(3S)Galb1-3GlcNAcb-Sp0	-45.8352	-43.0831	-1.35747	-9.25567	-9.93697	13.9785		6.64386	6.64386	6.64386	6.64386	6.64386	6.64386		0	0	0	0	0
ConA	445	LeC(6',3diSu)	(6S)Galb1-3(6S)GlcNAc-Sp0	-240.134	-35.6078	40.0925	-18.218	-11.6058	-13.5935		6.64386	6.64386	6.64386	6.64386	6.64386	6.64386		0	0	0	0	0
ConA	384	LeC/LeX	Galb1-4(Fuca1-3)GlcNAcb1-6(Galb1-3GlcNAcb1-3)Galb1-4Glc-Sp21	-138.273	-32.5837	25.9737	2.16778	-2.60068	4.2956		6.64386	6.64386	6.64386	6.64386	6.64386	6.64386		0	0	0	0	0
ConA	128	LeC-LeX	Galb1-3(Fuca1-4)GlcNAcb1-3Galb1-4GlcNAcb-Sp0	-137.98	-72.6437	-8.67217	-15.3393	-11.5523	6.1151		6.64386	6.64386	6.64386	6.64386	6.64386	6.64386		0	0	0	0	0
ConA	152	LeX	Galb1-4(Fuca1-3)GlcNAcb-Sp0	17.975	1.78715	18.8056	-5.11785	3.1688	-0.919175		6.64386	6.64386	6.64386	6.64386	6.64386	6.64386		0	0	0	0	0
ConA	153	LeX	Galb1-4(Fuca1-3)GlcNAcb-Sp8	-55.5051	-28.5216	5.35672	-3.61052	11.1175	-0.94095		6.64386	6.64386	6.64386	6.64386	6.64386	6.64386		0	0	0	0	0
ConA	328	LeX--	Galb1-4(Fuca1-3)GlcNAcb1-2Mana1-6(Galb1-4(Fuca1-3)GlcNAcb1-2Mana1-3)Manb1-4GlcNAcb1-4GlcNAcb-Sp20	24888.6	16369.1	1473.05	7.913	7.3034	1.03803		14.6032	13.9987	10.5246	6.64386	6.64386	6.64386		0.60451	3.47409	3.88074	0	0
ConA	402	LeX--	Galb1-4(Fuca1-3)GlcNacb1-3GalNaca-Sp14	108.172	1.67115	46.2932	-3.5746	5.42855	4.89145		6.75719	6.64386	6.64386	6.64386	6.64386	6.64386		0.11333	0	0	0	0
ConA	420	LeX--	Galb1-4(Fuca1-3)GlcNAcb1-2Mana1-6(Galb1-4(Fuca1-3)GlcNAcb1-2Mana1-3)Manb1-4GlcNAcb1-4(Fuca1-6)GlcNAcb-Sp22	193.211	-51.7271	141.125	18.5475	3.08472	7.29847		7.59404	6.64386	7.14083	6.64386	6.64386	6.64386		0.95018	-0.496975	0.496975	0	0
ConA	154	LeX (dimeric)	Galb1-4(Fuca1-3)GlcNAcb1-4Galb1-4(Fuca1-3)GlcNAcb-Sp0	403.812	292.475	81.8573	6.01778	-9.7362	4.96333		8.65754	8.19217	6.64386	6.64386	6.64386	6.64386		0.465372	1.54831	0	0	0
ConA	155	LeX (trimeric)	Galb1-4(Fuca1-3)GlcNAcb1-4Galb1-4(Fuca1-3)GlcNAcb1-4Galb1-4(Fuca1-3)GlcNAcb-Sp0	-40.3147	-5.3208	10.0685	14.0799	7.60025	9.6499		6.64386	6.64386	6.64386	6.64386	6.64386	6.64386		0	0	0	0	0
ConA	494	LeX/	Galb1-4(Fuca1-3)GlcNAcb1-6(Neu5Aca2-6(Neu5Aca2-3Galb1-3)GlcNAcb1-3)Galb1-4Glc-Sp21	228.873	-45.6731	3.852	3.16878	-4.60997	-2.98123		7.8384	6.64386	6.64386	6.64386	6.64386	6.64386		1.19455	0	0	0	0
ConA	497	LeX-b1-2Man	Galb1-4(Fuca1-3)GlcNAcb1-2Mana-Sp0	23.9817	-15.9173	51.8415	-10.904	2.1368	1.84127		6.64386	6.64386	6.64386	6.64386	6.64386	6.64386		0	0	0	0	0
ConA	448	LeX-b1-6GalNAc	Galb1-4(Fuca1-3)GlcNAcb1-6GalNAc-Sp14	498.956	-27.6995	53.9939	0.406925	-2.88948	18.3753		8.96277	6.64386	6.64386	6.64386	6.64386	6.64386		2.31891	0	0	0	0
ConA	293	LeX-LeA	Galb1-4(Fuca1-3)GlcNAcb1-3Galb1-3(Fuca1-4)GlcNAcb-Sp0	18.2229	-15.9422	54.6957	14.5951	3.1906	11.295		6.64386	6.64386	6.64386	6.64386	6.64386	6.64386		0	0	0	0	0
ConA	73	LeY	Fuca1-2Galb1-4(Fuca1-3)GlcNAcb-Sp8	129.668	-31.1929	93.8408	-0.432775	-5.5697	1.03663		7.01868	6.64386	6.64386	6.64386	6.64386	6.64386		0.374821	0	0	0	0
ConA	72	LeY	Fuca1-2Galb1-4(Fuca1-3)GlcNAcb-Sp0	-21.6677	-54.128	-3.40093	12.5384	6.40043	14.3471		6.64386	6.64386	6.64386	6.64386	6.64386	6.64386		0	0	0	0	0
ConA	363	LeY--	Fuca1-2Galb1-4(Fuca1-3)GlcNAcb1-2Mana1-6(Fuca1-2Galb1-4(Fuca1-3)GlcNAcb1-2Mana1-3)Manb1-4GlcNAcb1-4GlcNAb-Sp20	608.785	138.523	79.7921	27.8637	18.2493	36.4792		9.24979	7.11398	6.64386	6.64386	6.64386	6.64386		2.13581	0.470127	0	0	0
ConA	473	LeY like	Fuca1-2Galb1-4(Fuca1-3)GlcNAcb1-2Mana1-6(Fuca1-2Galb1-4(Fuca1-3)GlcNAcb1-2Mana1-3)Manb1-4GlcNAcb1-4(Fuca1-6)GlcNAcb-Sp24	1236.49	376.38	525.993	7.0387	27.8767	21.2278		10.272	8.55604	9.0389	6.64386	6.64386	6.64386		1.716	-0.482856	2.39504	0	0
ConA	447	LeY like	Fuca1-2Galb1-4(Fuca1-3)GlcNAcb1-2Mana1-6(Fuca1-2Galb1-4(Fuca1-3)GlcNAcb1-4(Fuca1-2Galb1-4(Fuca1-3)GlcNAcb1-2)Mana1-3)Manb1-4GlcNAcb1-4GlcNAcb-N	1189.14	43.0037	67.7754	-2.3582	-2.95053	23.4318		10.2157	6.64386	6.64386	6.64386	6.64386	6.64386		3.57185	0	0	0	0
ConA	70	LeY-LeX	Fuca1-2Galb1-4(Fuca1-3)GlcNAcb1-3Galb1-4(Fuca1-3)GlcNAcb-Sp0	61.8835	-27.141	6.37395	4.63713	3.62117	2.4222		6.64386	6.64386	6.64386	6.64386	6.64386	6.64386		0	0	0	0	0
ConA	71	LeY-LeX-LeX	Fuca1-2Galb1-4(Fuca1-3)GlcNAcb1-3Galb1-4(Fuca1-3)GlcNAcb1-3Galb1-4(Fuca1-3)GlcNAcb-Sp0	311.921	412.691	109.919	14.5309	16.7437	21.8464		8.28504	8.68892	6.78029	6.64386	6.64386	6.64386		-0.403884	1.90863	0.136436	0	0
ConA	417	LeYlike	Fuca1-2Galb1-4(Fuca1-3)GlcNAcb1-3GalNAca-Sp14	56.5568	126.493	301.336	28.0236	35.4092	41.8683		6.64386	6.98292	8.23523	6.64386	6.64386	6.64386		-0.33906	-1.25231	1.59137	0	0
ConA	19	LNnH-like	Galb1-4GlcNAcb1-6(Galb1-4GlcNAcb1-3)GalNAca-Sp8	-21.3617	94.3709	5.97642	2.65752	9.54185	4.3314		6.64386	6.64386	6.64386	6.64386	6.64386	6.64386		0	0	0	0	0
ConA	20	LNnH-like	Galb1-4GlcNAcb1-6(Galb1-4GlcNAcb1-3)GalNAc-Sp14	-15.9753	-4.2911	20.6726	4.8352	12.9825	3.69913		6.64386	6.64386	6.64386	6.64386	6.64386	6.64386		0	0	0	0	0
ConA	303	LNnH-like	Galb1-4GlcNAcb1-6(Galb1-4GlcNAcb1-3)Galb1-4GlcNAc-Sp0	-6.59972	-23.9093	4.7688	9.63252	1.05265	10.7504		6.64386	6.64386	6.64386	6.64386	6.64386	6.64386		0	0	0	0	0
ConA	166	LNnT	Galb1-4GlcNAcb1-3Galb1-4Glcb-Sp8	313.332	59.8207	33.2066	-1.7025	7.64963	6.69968		8.29155	6.64386	6.64386	6.64386	6.64386	6.64386		1.64769	0	0	0	0
ConA	165	LNnT	Galb1-4GlcNAcb1-3Galb1-4Glcb-Sp0	-42.4307	-10.5954	22.4798	4.29535	3.66047	7.17355		6.64386	6.64386	6.64386	6.64386	6.64386	6.64386		0	0	0	0	0
ConA	149	LNT	Galb1-3GlcNAcb1-3Galb1-4Glcb-Sp10	321.334	-15.2459	22.9123	0.10105	2.24183	3.94435		8.32793	6.64386	6.64386	6.64386	6.64386	6.64386		1.68407	0	0	0	0
ConA	186	LNT-2	GlcNAcb1-3Galb1-4Glcb-Sp0	-9.55257	-16.2704	25.6236	0.12425	5.10895	2.17328		6.64386	6.64386	6.64386	6.64386	6.64386	6.64386		0	0	0	0	0
ConA	248	LSTa-like	Neu5Aca2-3Galb1-3GlcNAcb1-3Galb1-4GlcNAcb-Sp0	19.9509	-10.0484	-3.53503	-2.0489	-3.20638	-2.90542		6.64386	6.64386	6.64386	6.64386	6.64386	6.64386		0	0	0	0	0
ConA	139	LSTb-like	Neu5Aca2-6(Galb1-3)GlcNAcb1-4Galb1-4Glcb-Sp10	-52.5283	-32.2768	7.8221	6.0487	-0.727	1.38012		6.64386	6.64386	6.64386	6.64386	6.64386	6.64386		0	0	0	0	0
ConA	197	maltose-a	Glca1-4Glca-Sp8	459.797	2.13965	65.0215	-1.1106	0.090975	-3.13952		8.84485	6.64386	6.64386	6.64386	6.64386	6.64386		2.201	0	0	0	0
ConA	196	maltose-b	Glca1-4Glcb-Sp8	-84.8116	-16.8436	71.6554	3.10102	4.02187	8.11348		6.64386	6.64386	6.64386	6.64386	6.64386	6.64386		0	0	0	0	0
ConA	471	maltotetraose	Glca1-4Glca1-4Glca1-4Glcb-Sp10	-151.306	-62.1139	83.0392	-6.86588	11.8375	0.01505		6.64386	6.64386	6.64386	6.64386	6.64386	6.64386		0	0	0	0	0
ConA	215	Man	Mana1-2Mana1-2Mana1-6(Mana1-3)Mana-Sp9	34121.1	33882.2	31017.7	8166.97	8673.48	1169.44		15.0584	15.0482	14.9208	12.9956	13.0824	10.1916		0.0101363	0.127433	1.92522	-0.0868095	2.89079
ConA	41	Man(6P)	(6P)Mana-Sp8	-27.0421	-8.68177	119.085	19.7037	-7.73615	23.8003		6.64386	6.64386	6.89584	6.64386	6.64386	6.64386		0	-0.251988	0.251988	0	0
ConA	218	Man1	Manb1-4GlcNAcb-Sp0	-129.531	-57.9804	20.6568	-0.2076	4.08477	-2.59575		6.64386	6.64386	6.64386	6.64386	6.64386	6.64386		0	0	0	0	0
ConA	50	Man3	Mana1-6(Mana1-3)Manb1-4GlcNAcb1-4GlcNAcb-Sp12	35274.9	31853.2	38005.3	5073.08	510.209	281.146		15.1064	14.9592	15.2139	12.3086	8.99494	8.13518		0.147203	-0.254763	2.90527	3.3137	0.859766
ConA	51	Man3	Mana1-6(Mana1-3)Manb1-4GlcNAcb1-4GlcNAcb-Sp13	42504.8	30536.1	36419.1	11399.9	5813.81	553.191		15.3753	14.8982	15.1524	13.4767	12.5053	9.11163		0.477111	-0.254178	1.67568	0.971461	3.39364
ConA	485	Man3F	Mana1-6(Mana1-3)Manb1-4GlcNAcb1-4(Fuca1-6)GlcNAcb-Sp19	38453	36236.5	15250.7	1585.07	1990.11	265.516		15.2308	15.1452	13.8966	10.6303	10.9586	8.05265		0.0856498	1.24857	3.26625	-0.3283	2.90598
ConA	315	Man5	Mana1-6(Mana1-3)Mana1-6(Mana1-3)Manb-Sp10	32005.1	29442	29982.6	5258.45	5249.23	537.275		14.966	14.8456	14.8718	12.3604	12.3579	9.06952		0.120427	-0.0262501	2.51142	0.00253105	3.28837
ConA	217	Man5	Mana1-6(Mana1-3)Mana1-6(Mana1-3)Manb1-4GlcNAcb1-4GlcNAcb-Sp12	38826	28615.8	50032.3	5784.36	5983.17	527.352		15.2447	14.8045	15.6106	12.4979	12.5467	9.04262		0.440212	-0.806048	3.11263	-0.0487542	3.50407
ConA	216	Man6-I	Mana1-6(Mana1-3)Mana1-6(Mana1-2Mana1-3)Manb1-4GlcNAcb1-4GlcNAcb-Sp12	41082.4	47253.4	48820.9	8982.16	6147.92	553.582		15.3262	15.5281	15.5752	13.1328	12.5859	9.11265		-0.201896	-0.0470819	2.44236	0.546964	3.47323
ConA	211	Man7D2	Mana1-6(Mana1-2Mana1-3)Mana1-6(Mana1-2Mana1-3)Manb1-4GlcNAcb1-4GlcNAcb-Sp12	36146.1	39418.8	28130.5	3931.35	4364.06	596.917		15.1416	15.2666	14.7798	11.9408	12.0915	9.22139		-0.125044	0.486752	2.83904	-0.150646	2.87007
ConA	212	Man8	Mana1-2Mana1-6(Mana1-3)Mana1-6(Mana1-2Mana1-2Mana1-3)Manb1-4GlcNAcb1-4GlcNAcb-Sp12	55881.7	36617.6	41125.4	12297.3	3746.42	579.33		15.7701	15.1602	15.3277	13.5861	11.8713	9.17824		0.609841	-0.167495	1.74169	1.71476	2.69306
ConA	316	Man8D1D3	Mana1-2Mana1-6(Mana1-3)Mana1-6(Mana1-2Mana1-2Mana1-3)Mana-Sp9	36801.8	33623.4	35116.4	6303.89	6004.18	884.183		15.1675	15.0372	15.0999	12.622	12.5518	9.7882		0.130311	-0.0626797	2.47783	0.0702747	2.76355
ConA	317	Man9	Mana1-2Mana1-6(Mana1-2Mana1-3)Mana1-6(Mana1-2Mana1-2Mana1-3)Mana-Sp9	35077.4	27832.2	38880.1	4613.47	5350.19	1093.21		15.0983	14.7645	15.2467	12.1716	12.3854	10.0944		0.333787	-0.482278	3.07511	-0.213737	2.29102
ConA	213	Man9	Mana1-2Mana1-6(Mana1-2Mana1-3)Mana1-6(Mana1-2Mana1-2Mana1-3)Manb1-4GlcNAcb1-4GlcNAcb-Sp12	27684.3	26458.2	18115.5	2569.19	2529.8	302.804		14.7568	14.6914	14.1449	11.3271	11.3048	8.24224		0.0653516	0.546493	2.81784	0.0222859	3.06257
ConA	3	Man-a	Mana-Sp8	7148.5	66.9861	323.881	32.7202	20.2175	12.3609		12.8034	6.64386	8.33932	6.64386	6.64386	6.64386		6.15957	-1.69546	1.69546	0	0
ConA	314	Mana1-6Man-b	Mana1-6Manb-Sp10	82.8403	26.4596	113.644	1.7245	5.2247	9.19215		6.64386	6.64386	6.82838	6.64386	6.64386	6.64386		0	-0.184526	0.184526	0	0
ConA	14	Man-b	Manb-Sp8	-5.0544	-6.43515	167.778	2.93548	11.0533	13.3043		6.64386	6.64386	7.39041	6.64386	6.64386	6.64386		0	-0.746554	0.746554	0	0
ConA	208	ManD1arm	Mana1-2Mana1-2Mana1-3Mana-Sp9	37383.2	35733	23673.1	1734.33	1278.31	151.626		15.1901	15.125	14.531	10.7602	10.32	7.24437		0.0651329	0.594013	3.77079	0.440148	3.07564
ConA	209	ManD2D3arm	Mana1-2Mana1-6(Mana1-2Mana1-3)Mana-Sp9	35882.2	37007.8	34350.2	7542.78	7143.29	1349.14		15.131	15.1755	15.068	12.8809	12.8024	10.3978		-0.0445629	0.107511	2.18715	0.0785081	2.40455
ConA	210	ManDx arm	Mana1-2Mana1-3Mana-Sp9	35979.1	39112.3	31673.1	4014.35	3266.63	350.609		15.1349	15.2553	14.951	11.9709	11.6736	8.45372		-0.120464	0.304365	2.98002	0.297363	3.21987
ConA	214	ManT	Mana1-6(Mana1-3)Mana-Sp9	39736.1	29565.6	37576.2	14138	491.514	759.717		15.2782	14.8516	15.1975	13.7873	8.94109	9.56932		0.426531	-0.345899	1.41024	4.84621	-0.628231
ConA	125	melibiose	Gala1-6Glcb-Sp8	-38.3487	6.15318	39.9035	-0.040425	2.91975	6.68517		6.64386	6.64386	6.64386	6.64386	6.64386	6.64386		0	0	0	0	0
ConA	387	MFiLNO	Galb1-3GlcNAcb1-3Galb1-4(Fuca1-3)GlcNAcb1-6(Galb1-3GlcNAcb1-3)Galb1-4Glc-Sp21	-11.6184	71.1757	25.0734	9.69992	3.44402	20.7111		6.64386	6.64386	6.64386	6.64386	6.64386	6.64386		0	0	0	0	0
ConA	430	MFLNH I	Galb1-4GlcNAcb1-6(Fuca1-2Galb1-3GlcNAcb1-3)Galb1-4Glc-Sp21	-93.4793	-98.0038	81.9143	-1.01983	-0.15125	8.78333		6.64386	6.64386	6.64386	6.64386	6.64386	6.64386		0	0	0	0	0
ConA	411	MSLNH	Galb1-4GlcNAcb1-6(Neu5Aca2-6Galb1-3GlcNAcb1-3)Galb1-4Glc-Sp21	-23.6893	18.5237	8.9679	3.36907	-5.72982	0.276425		6.64386	6.64386	6.64386	6.64386	6.64386	6.64386		0	0	0	0	0
ConA	457	MSMFLNH I	Neu5Aca2-6Galb1-4GlcNAcb1-6(Fuca1-2Galb1-3GlcNAcb1-3)Galb1-4Glc-Sp21	-51.1942	-14.443	29.1408	1.226	-4.12843	-3.26992		6.64386	6.64386	6.64386	6.64386	6.64386	6.64386		0	0	0	0	0
ConA	396	N-	Gala1-3Galb1-3(Fuca1-4)GlcNAcb1-2Mana1-6(Gala1-3Galb1-3(Fuca1-4)GlcNAcb1-2Mana1-3)Manb1-4GlcNAcb1-4GlcNAc-Sp19	36771.3	43344.4	4783.45	128.928	177.791	49.0005		15.1663	15.4036	12.2238	7.01043	7.47404	6.64386		-0.237264	3.17972	5.21341	-0.463614	0.830185
ConA	395	N-	Gala1-3Galb1-3GlcNAcb1-2Mana1-6(Gala1-3Galb1-3GlcNAcb1-2Mana1-3)Manb1-4GlcNAcb1-4GlcNAc-Sp19	19323	9873.87	996.915	56.9981	45.2937	50.7885		14.238	13.2694	9.96133	6.64386	6.64386	6.64386		0.968629	3.30807	3.31747	0	0
ConA	365	NA1?	Galb1-4GlcNAcb1-2Mana1-6(Mana1-3)Manb1-4GlcNAcb1-4GlcNAcb-Sp12	32713.4	31304.4	6366.41	158.767	527.941	4.77675		14.9976	14.9341	12.6363	7.31076	9.04423	6.64386		0.0635139	2.29782	5.3255	-1.73347	2.40038
ConA	352	NA1?	Mana1-6(Galb1-4GlcNAcb1-2Mana1-3)Manb1-4GlcNAcb1-4GlcNAcb-Sp12	39137.3	24939	33134.6	3990.74	2490.29	98.5139		15.2563	14.6061	15.016	11.9624	11.2821	6.64386		0.650139	-0.409932	3.05361	0.680345	4.63824
ConA	351	NA1?	Galb1-4GlcNAcb1-2Mana1-6Manb1-4GlcNAcb1-4GlcNAc-Sp12	45.1139	64.7128	19.0043	-7.47772	-4.03457	0.54565		6.64386	6.64386	6.64386	6.64386	6.64386	6.64386		0	0	0	0	0
ConA	350	NA1?	Galb1-4GlcNAcb1-2Mana1-3Manb1-4GlcNAcb1-4GlcNAc-Sp12	725.1	-67.8228	12.1547	-7.62143	-13.2962	-1.92993		9.50204	6.64386	6.64386	6.64386	6.64386	6.64386		2.85818	0	0	0	0
ConA	399	NA1B?	Galb1-4GlcNAcb1-2Mana1-6(GlcNAcb1-2Mana1-3)Manb1-4GlcNAcb1-4GlcNAc-Sp12	37441.3	30399	8480.36	621.732	318.031	3.10902		15.1923	14.8917	13.0499	9.28015	8.31303	6.64386		0.300606	1.84183	3.76976	0.967124	1.66917
ConA	54	NA2	Galb1-4GlcNAcb1-2Mana1-6(Galb1-4GlcNAcb1-2Mana1-3)Manb1-4GlcNAcb1-4GlcNAcb-Sp12	38159.7	37472.7	8060.56	186.628	65.7636	14.8682		15.2198	15.1936	12.9767	7.54402	6.64386	6.64386		0.0262107	2.21689	5.43264	0.900168	0
ConA	436	NA2B	Galb1-4GlcNAcb1-2Mana1-6(GlcNAcb1-4)(Galb1-4GlcNAcb1-2Mana1-3)Manb1-4GlcNAcb1-4GlcNAc-Sp21	10467.5	6702.48	451.266	-1.89345	-3.43973	-5.88115		13.3536	12.7105	8.81783	6.64386	6.64386	6.64386		0.643156	3.89265	2.17398	0	0
ConA	532	NA2BF	Galb1-4GlcNAcb1-2 Mana1-6(GlcNAcb1-4)(Galb1-4GlcNAcb1-2Mana1-3)Manb1-4GlcNAcb1-4(Fuca1-6)GlcNAc-Sp21	472.514	79.6458	13.7371	-0.052525	5.32657	-2.73592		8.88421	6.64386	6.64386	6.64386	6.64386	6.64386		2.24036	0	0	0	0
ConA	370	NA3	Galb1-4GlcNAcb1-2Mana1-6(Galb1-4GlcNAcb1-4(Galb1-4GlcNAcb1-2)Mana1-3)Manb1-4GlcNAcb1-4GlcNAc-Sp21	8079.25	3408.83	224.028	20.0314	-0.06645	13.5707		12.98	11.7351	7.80753	6.64386	6.64386	6.64386		1.24495	3.92753	1.16368	0	0
ConA	459	NA3 related	Galb1-4GlcNAcb1-6(Galb1-4GlcNAcb1-2)Mana1-6(Galb1-4GlcNAcb1-2Mana1-3)Manb1-4GlcNAcb1-4GlcNAcb-Sp19	20872.6	16499.5	2346.6	54.2389	14.0539	-10.2869		14.3493	14.0101	11.1964	6.64386	6.64386	6.64386		0.339184	2.81378	4.5525	0	0
ConA	438	NA3B	Galb1-4GlcNAcb1-6(Galb1-4GlcNAcb1-2)Mana1-6(GlcNAcb1-4)(Galb1-4GlcNAcb1-2Mana1-3)Manb1-4GlcNAcb1-4GlcNAc-Sp21	111.452	-14.8667	73.4875	-4.0801	-5.99023	-3.08077		6.80028	6.64386	6.64386	6.64386	6.64386	6.64386		0.156427	0	0	0	0
ConA	437	NA3B	Galb1-4GlcNAcb1-2Mana1-6(GlcNAcb1-4)(Galb1-4GlcNAcb1-4(Galb1-4GlcNAcb1-2)Mana1-3)Manb1-4GlcNAcb1-4GlcNAc-Sp21	4.81035	-16.7212	21.1322	7.92412	-5.3221	2.86297		6.64386	6.64386	6.64386	6.64386	6.64386	6.64386		0	0	0	0	0
ConA	486	NA3F	Galb1-4GlcNAcb1-6(Galb1-4GlcNAcb1-2)Mana1-6(Galb1-4GlcNAcb1-2Mana1-3)Manb1-4GlcNAcb1-4(Fuca1-6)GlcNAcb-Sp24	4628.39	1383.65	111.588	-5.54837	-6.56025	0.927075		12.1763	10.4343	6.80204	6.64386	6.64386	6.64386		1.74204	3.63222	0.15818	0	0
ConA	533	NA3F	Galb1-4GlcNAcb1-2 Mana1-6(Galb1-4GlcNAcb1-4)(Galb1-4GlcNAcb1-2Mana1-3)Manb1-4GlcNAcb1-4(Fuca1-6)GlcNAc-Sp21	62.9065	55.6016	11.4081	4.76483	-8.969	-4.37418		6.64386	6.64386	6.64386	6.64386	6.64386	6.64386		0	0	0	0	0
ConA	388	NA4	Galb1-4GlcNacb1-6(Galb1-4GlcNacb1-2)Mana1-6(Galb1-4GlcNacb1-4(Galb1-4GlcNacb1-2)Mana1-3)Manb1-4GlcNacb1-4GlcNacb-Sp21	9989.58	7309.04	874.446	76.4884	107.631	10.5093		13.2862	12.8355	9.77223	6.64386	6.74995	6.64386		0.450743	3.06324	3.12837	-0.106097	0.106097
ConA	439	NA4B	Galb1-4GlcNAcb1-6(Galb1-4GlcNAcb1-2)Mana1-6(GlcNAcb1-4)(Galb1-4GlcNAcb1-4(Galb1-4GlcNAcb1-2)Mana1-3)Manb1-4GlcNAcb1-4GlcNAc-Sp21	-75.4509	36.5968	43.0403	-4.5204	-7.91445	14.8264		6.64386	6.64386	6.64386	6.64386	6.64386	6.64386		0	0	0	0	0
ConA	509	NA4BF	Galb1-4GlcNAcb1-6(Galb1-4GlcNAcb1-2)Mana1-6(GlcNAcb1-4)Galb1-4GlcNAcb1-4(Gal b1-4GlcNAcb1-2)Mana1-3)Manb1-4GlcNAcb1-4(Fuca1-6)GlcNAc-Sp21	155.06	-34.307	17.8752	-2.78833	6.03748	0.528075		7.27668	6.64386	6.64386	6.64386	6.64386	6.64386		0.632826	0	0	0	0
ConA	354	NAF2	Galb1-4GlcNAcb1-2Mana1-6(Galb1-4GlcNAcb1-2Mana1-3)Manb1-4GlcNAcb1-4(Fuca1-6)GlcNAcb-Sp22	44830.8	32566	4241.16	200.951	55.3262	-12.6783		15.4522	14.9911	12.0502	7.6507	6.64386	6.64386		0.461123	2.94084	4.39954	1.00685	0
ConA	10	Neu5Ac-a	Neu5Aca-Sp11	36.3337	-22.975	7.41643	-5.68393	-10.9251	-6.6287		6.64386	6.64386	6.64386	6.64386	6.64386	6.64386		0	0	0	0	0
ConA	9	Neu5Ac-a	Neu5Aca-Sp8	24.8745	-23.6116	-9.58027	0.40005	10.8988	-13.856		6.64386	6.64386	6.64386	6.64386	6.64386	6.64386		0	0	0	0	0
ConA	11	Neu5Ac-b	Neu5Acb-Sp8	-107.269	31.6613	-9.92185	4.7865	11.0499	-2.01615		6.64386	6.64386	6.64386	6.64386	6.64386	6.64386		0	0	0	0	0
ConA	52	NGA2	GlcNAcb1-2Mana1-6(GlcNAcb1-2Mana1-3)Manb1-4GlcNAcb1-4GlcNAcb-Sp12	33083.8	41515.3	13193.5	997.293	918.418	99.0204		15.0138	15.3414	13.6875	9.96187	9.84301	6.64386		-0.327519	1.65381	3.72567	0.118867	3.19915
ConA	53	NGA2	GlcNAcb1-2Mana1-6(GlcNAcb1-2Mana1-3)Manb1-4GlcNAcb1-4GlcNAcb-Sp13	42923.2	39765.1	22475.3	2486.05	1518.52	149.171		15.3895	15.2792	14.4561	11.2796	10.5685	7.22083		0.110255	0.823164	3.17641	0.711188	3.34762
ConA	531	NGA2BF	GlcNAcb1-2 Mana1-6(GlcNAcb1-4)(GlcNAcb1-2Mana1-3)Manb1-4GlcNAcb1-4(Fuca1-6)GlcNAc-Sp21	29285.4	23560.8	2263.36	94.5212	80.4859	28.3233		14.8379	14.5241	11.1443	6.64386	6.64386	6.64386		0.31379	3.37985	4.5004	0	0
ConA	432	NGA3	GlcNAcb1-2Mana1-6(GlcNAcb1-4)(GlcNAcb1-2Mana1-3)Manb1-4GlcNacb1-4GlcNAc-Sp21	36725.7	32026.4	6323.06	465.204	429.579	-4.66315		15.1645	14.967	12.6264	8.86172	8.74678	6.64386		0.197531	2.34056	3.76469	0.114942	2.10292
ConA	389	NGA3	GlcNacb1-2Mana1-6(GlcNacb1-4(GlcNacb1-2)Mana1-3)Manb1-4GlcNacb1-4GlcNac-Sp21	13732.3	7628.83	504.636	14.6079	4.52835	3.36547		13.7453	12.8972	8.9791	6.64386	6.64386	6.64386		0.848034	3.91815	2.33524	0	0
ConA	422	NGA3	GlcNAcb1-2(GlcNAcb1-6)Mana1-6(GlcNAcb1-2Mana1-3)Manb1-4GlcNAcb1-4GlcNAcb-Sp19	10863.3	3047.35	402.328	1.57205	-7.14145	2.06225		13.4072	11.5733	8.65223	6.64386	6.64386	6.64386		1.83383	2.92111	2.00837	0	0
ConA	434	NGA3B	GlcNAcb1-6(GlcNAcb1-2)Mana1-6(GlcNAcb1-4)(GlcNAcb1-2Mana1-3)Manb1-4GlcNAcb1-4GlcNAc-Sp21	20239	10659.1	479.783	1.4348	-7.80578	4.7274		14.3049	13.3798	8.90624	6.64386	6.64386	6.64386		0.925052	4.47356	2.26238	0	0
ConA	433	NGA3B	GlcNAcb1-2Mana1-6(GlcNAcb1-4)(GlcNAcb1-4(GlcNAcb1-2)Mana1-3)Manb1-4GlcNAcb1-4GlcNAc-Sp21	370.333	141.968	30.5733	-7.39292	-0.58405	5.50432		8.53268	7.14942	6.64386	6.64386	6.64386	6.64386		1.38326	0.505564	0	0	0
ConA	476	NGA3F	GlcNAcb1-6(GlcNAcb1-2)Mana1-6(GlcNAcb1-2Mana1-3)Manb1-4GlcNAcb1-4(Fuca1-6)GlcNAcb-Sp24	9277.21	3559.51	520.561	16.3976	1.04208	4.36163		13.1795	11.7975	9.02392	6.64386	6.64386	6.64386		1.38201	2.77354	2.38007	0	0
ConA	435	NGA4B	GlcNAcb1-6(GlcNAcb1-2)Mana1-6(GlcNAcb1-4)(GlcNAcb1-4(GlcNAcb1-2)Mana1-3)Manb1-4GlcNAcb1-4GlcNAc-Sp21	-84.3478	-14.3993	-2.78392	-0.01675	-10.8986	-0.2898		6.64386	6.64386	6.64386	6.64386	6.64386	6.64386		0	0	0	0	0
ConA	508	NGA4BF	GlcNAcb1-6(GlcNAcb1-2)Mana1-6(GlcNAcb1-4)(GlcNAcb1-4(GlcNAcb1-2)Mana1-3)Manb1-4GlcNAcb1-4(Fuca1-6)GlcNAc-Sp21	6.52722	-38.38	-8.52093	-3.45388	-5.76192	-10.4079		6.64386	6.64386	6.64386	6.64386	6.64386	6.64386		0	0	0	0	0
ConA	353	NGAF2	GlcNAcb1-2Mana1-6(GlcNAcb1-2Mana1-3)Manb1-4GlcNAcb1-4(Fuca1-6)GlcNAcb-Sp22	42532	30732.1	5946.53	585.04	465.953	33.4581		15.3763	14.9075	12.5378	9.19239	8.86404	6.64386		0.4688	2.36963	3.34544	0.328353	2.22018
ConA	121	P1	Gala1-4Galb1-4GlcNAcb-Sp0	-4.09733	2.94803	20.9387	8.66405	21.7755	0.09		6.64386	6.64386	6.64386	6.64386	6.64386	6.64386		0	0	0	0	0
ConA	122	P1	Gala1-4Galb1-4GlcNAcb-Sp8	-16.2404	-19.4906	28.1028	-0.741175	3.77725	7.04447		6.64386	6.64386	6.64386	6.64386	6.64386	6.64386		0	0	0	0	0
ConA	334	P1 like	Gala1-4Galb1-4GlcNAcb1-3Galb1-4Glcb-Sp0	-43.6295	-39.3001	31.934	-4.1316	1.75498	0.6457		6.64386	6.64386	6.64386	6.64386	6.64386	6.64386		0	0	0	0	0
ConA	123	Pk	Gala1-4Galb1-4Glcb-Sp0	301.947	49.7568	23.6125	3.82082	8.74905	18.5612		8.23815	6.64386	6.64386	6.64386	6.64386	6.64386		1.59429	0	0	0	0
ConA	148	pLNH tetra	Galb1-3GlcNAcb1-3Galb1-4GlcNAcb-Sp0	30.6396	-12.3186	8.804	4.70935	0.572575	8.58227		6.64386	6.64386	6.64386	6.64386	6.64386	6.64386		0	0	0	0	0
ConA	8	Rha-a	Rhaa-Sp8	591.551	-22.1589	-10.5905	-4.72143	-11.7984	-0.969675		9.20836	6.64386	6.64386	6.64386	6.64386	6.64386		2.5645	0	0	0	0
ConA	442	Sia-LNnT	Neu5Aca2-3Galb1-4GlcNAcb1-3Galb-Sp8	-54.035	-108.135	5.74142	-6.80495	-3.2806	-23.4477		6.64386	6.64386	6.64386	6.64386	6.64386	6.64386		0	0	0	0	0
ConA	240	SLeA	Neu5Aca2-3Galb1-3( Fuca1-4)GlcNAcb-Sp8	-52.9228	-48.6413	-4.5899	7.29645	-9.46218	-4.31045		6.64386	6.64386	6.64386	6.64386	6.64386	6.64386		0	0	0	0	0
ConA	281	SLeA (Gc)	Neu5Gca2-3Galb1-3(Fuca1-4)GlcNAcb-Sp0	-24.672	-41.3035	13.9462	-0.67055	0.570725	10.0793		6.64386	6.64386	6.64386	6.64386	6.64386	6.64386		0	0	0	0	0
ConA	332	SLeA-LeA	Neu5Aca2-3Galb1-3(Fuca1-4)GlcNAcb1-3Galb1-3(Fuca1-4)GlcNAcb-Sp0	1169.99	670.046	158.103	6.73088	2.3214	8.26988		10.1923	9.38812	7.30472	6.64386	6.64386	6.64386		0.804165	2.08339	0.660868	0	0
ConA	241	SLeA-LeX	Neu5Aca2-3Galb1-3(Fuca1-4)GlcNAcb1-3Galb1-4(Fuca1-3)GlcNAcb-Sp0	311.047	336.915	191.519	5.25353	-4.25625	-1.91383		8.28099	8.39624	7.58134	6.64386	6.64386	6.64386		-0.115253	0.814898	0.937487	0	0
ConA	254	SLeX	Neu5Aca2-3Galb1-4(Fuca1-3)GlcNAcb1-3Galb1-4(Fuca1-3)GlcNAcb1-3Galb1-4(Fuca1-3)GlcNAcb-Sp0	651.89	409.324	61.3272	9.2265	1.69752	15.5773		9.34848	8.6771	6.64386	6.64386	6.64386	6.64386		0.671387	2.03324	0	0	0
ConA	256	SLeX	Neu5Aca2-3Galb1-4(Fuca1-3)GlcNAcb-Sp8	-32.3923	17.9161	-0.776175	-7.58242	-3.84063	0.84445		6.64386	6.64386	6.64386	6.64386	6.64386	6.64386		0	0	0	0	0
ConA	255	SLeX	Neu5Aca2-3Galb1-4(Fuca1-3)GlcNAcb-Sp0	-14.2929	0.62955	53.5329	6.16095	-0.105625	-3.33195		6.64386	6.64386	6.64386	6.64386	6.64386	6.64386		0	0	0	0	0
ConA	257	SLeX	Neu5Aca2-3Galb1-4(Fuca1-3)GlcNAcb1-3Galb-Sp8	17.0085	-22.14	0.374025	0.522525	6.1226	-5.6419		6.64386	6.64386	6.64386	6.64386	6.64386	6.64386		0	0	0	0	0
ConA	258	SLeX	Neu5Aca2-3Galb1-4(Fuca1-3)GlcNAcb1-3Galb1-4GlcNAcb-Sp8	-38.649	-23.1011	14.3417	4.25177	5.30747	7.9609		6.64386	6.64386	6.64386	6.64386	6.64386	6.64386		0	0	0	0	0
ConA	379	SLeX	Neu5Aca2-3Galb1-4(Fuca1-3)GlcNAcb1-3GalNAca-Sp14	-65.9165	-42.1883	74.4374	10.4844	3.65445	31.3914		6.64386	6.64386	6.64386	6.64386	6.64386	6.64386		0	0	0	0	0
ConA	283	SLeX (Gc)	Neu5Gca2-3Galb1-4(Fuca1-3)GlcNAcb-Sp0	-64.999	-8.35615	-6.14225	1.95257	16.1307	-1.22973		6.64386	6.64386	6.64386	6.64386	6.64386	6.64386		0	0	0	0	0
ConA	535	SLeX like	Neu5Aca2-3Galb1-4(Fuca1-3)GlcNAcb1-2Mana-Sp0	-19.5157	-19.4774	46.452	-2.32945	0.579225	9.01923		6.64386	6.64386	6.64386	6.64386	6.64386	6.64386		0	0	0	0	0
ConA	253	SLeX(6Su)	Neu5Aca2-3Galb1-4(Fuca1-3)(6S)GlcNAcb-Sp8	-6.74762	17.7334	9.3097	2.22928	0.305425	-0.1901		6.64386	6.64386	6.64386	6.64386	6.64386	6.64386		0	0	0	0	0
ConA	231	SLeX(6'Su)	Neu5Aca2-3(6S)Galb1-4(Fuca1-3)GlcNAcb-Sp8	6.98368	-13.7317	131.054	5.4378	2.37762	0.95465		6.64386	6.64386	7.03401	6.64386	6.64386	6.64386		0	-0.390157	0.390157	0	0
ConA	247	SSEA-4	Neu5Aca2-3Galb1-3GalNAcb1-3Gala1-4Galb1-4Glcb-Sp0	364.167	-9.857	4.6926	22.2186	11.4446	3.57557		8.50846	6.64386	6.64386	6.64386	6.64386	6.64386		1.8646	0	0	0	0
ConA	279	STn like	Neu5Acb2-6GalNAca-Sp8	-15.7085	38.3375	25.6249	19.4128	0.597325	2.2555		6.64386	6.64386	6.64386	6.64386	6.64386	6.64386		0	0	0	0	0
ConA	29	TF(3’su)	(3S)Galb1-3GalNAca-Sp8	-16.3065	-35.9674	113.156	-1.90842	-2.20298	-2.24202		6.64386	6.64386	6.82218	6.64386	6.64386	6.64386		0	-0.178319	0.178319	0	0
ConA	141	TF(Thr)	Galb1-3GalNAca-Sp14	-71.239	-28.1288	78.9638	5.52625	0.0093	3.85548		6.64386	6.64386	6.64386	6.64386	6.64386	6.64386		0	0	0	0	0
ConA	111	Tfaa or core8	Gala1-3GalNAca-Sp8	-36.5102	9.2139	6.69865	46.5562	27.1391	23.031		6.64386	6.64386	6.64386	6.64386	6.64386	6.64386		0	0	0	0	0
ConA	112	Tfaa or core8	Gala1-3GalNAca-Sp16	-13.2105	2.89663	29.158	2.27987	-7.0809	-2.36655		6.64386	6.64386	6.64386	6.64386	6.64386	6.64386		0	0	0	0	0
ConA	113	TFab	Gala1-3GalNAcb-Sp8	20.8531	-10.2356	16.3892	-0.1895	1.48308	10.6097		6.64386	6.64386	6.64386	6.64386	6.64386	6.64386		0	0	0	0	0
ConA	140	TFdi	Galb1-3GalNAca-Sp8	62.3488	27.087	0.88805	6.25305	-3.55748	1.47827		6.64386	6.64386	6.64386	6.64386	6.64386	6.64386		0	0	0	0	0
ConA	382	Tfdi	Galb1-3GalNAca1-3(Fuca1-2)Galb1-4GlcNAc-Sp0	-79.9714	-12.3795	85.2826	-7.69745	-3.56778	4.49648		6.64386	6.64386	6.64386	6.64386	6.64386	6.64386		0	0	0	0	0
ConA	142	TFdi	Galb1-3GalNAca-Sp16	-6.75935	-44.2685	-1.63828	2.73035	4.69818	-0.9048		6.64386	6.64386	6.64386	6.64386	6.64386	6.64386		0	0	0	0	0
ConA	381	Tfdi	Galb1-3GalNAca1-3(Fuca1-2)Galb1-4Glc-Sp0	-102.136	-79.6005	-19.5124	-10.2434	3.6632	1.10368		6.64386	6.64386	6.64386	6.64386	6.64386	6.64386		0	0	0	0	0
ConA	5	Tn(Ser)	GalNAca-Sp15	5.17047	62.7348	62.0166	-0.2373	0.631975	27.0857		6.64386	6.64386	6.64386	6.64386	6.64386	6.64386		0	0	0	0	0
ConA	405		Gala1-4Galb1-4GlcNacb1-2Mana1-6(Gala1-4Galb1-4GlcNacb1-2Mana1-3)Manb1-4GlcNacb1-4GlcNacb-Sp24	36857.9	42289.7	7596.97	307.936	101.85	-0.008275		15.1697	15.368	12.8912	8.26649	6.6703	6.64386		-0.198333	2.47681	4.62472	1.59619	0.0264414
ConA	398		GlcNAcb1-2Mana1-6(Galb1-4GlcNAcb1-2Mana1-3)Manb1-4GlcNAcb1-4GlcNAc-Sp12	39380.1	40278.6	12925.4	1305.3	623.452	35.9027		15.2652	15.2977	13.6579	10.3502	9.28413	6.64386		-0.0325466	1.6398	3.30776	1.06603	2.64028
ConA	404		Gala1-4Galb1-3GlcNacb1-2Mana1-6(Gala1-4Galb1-3GlcNacb1-2Mana1-3)Manb1-4GlcNacb1-4GlcNacb-Sp19	40001.1	40020.7	15896	1290.96	755.102	64.3936		15.2878	15.2885	13.9564	10.3342	9.56053	6.64386		-0.000708217	1.33208	3.62215	0.773698	2.91667
ConA	364		Gala1-3Galb1-4GlcNAcb1-2Mana1-6(Gala1-3Galb1-4GlcNAcb1-2Mana1-3)Manb1-4GlcNAcb1-4GlcNAcb-Sp20	42513.7	34081.2	5962.31	139.302	250.293	17.2816		15.3756	15.0567	12.5417	7.12207	7.96748	6.64386		0.31895	2.51504	5.41958	-0.845404	1.32362
ConA	373		Gala1-3Galb1-4(Fuca1-3)GlcNAcb1-2Mana1-6(Gala1-3Galb1-4(Fuca1-3)GlcNAcb1-2Mana1-3)Manb1-4GlcNAcb1-4GlcNAcb-Sp20	13682	5042.69	350.04	2.44605	-10.1145	-49.1513		13.74	12.3	8.45137	6.64386	6.64386	6.64386		1.44001	3.8486	1.80752	0	0
ConA	343		GlcNAca1-4Galb1-4GlcNAcb1-3Galb1-4(Fuca1-3)GlcNAcb1-3Galb1-4(Fuca1-3)GlcNAcb-Sp0	2142.78	1476.75	639.944	30.748	4.24545	28.6798		11.0653	10.5282	9.3218	6.64386	6.64386	6.64386		0.537057	1.20641	2.67795	0	0
ConA	360		KDNa2-3Galb1-3GalNAca-Sp14	2185.64	1186.21	239.736	3.0728	-1.53422	-5.51425		11.0938	10.2121	7.90531	6.64386	6.64386	6.64386		0.881698	2.30683	1.26145	0	0
ConA	568		Galb1-3GlcNAcb1-6(Galb1-3)GalNAc-Sp14	567.175	613.848	87.8631	-6.88943	-4.4027	-4.41127		9.14765	9.26174	6.64386	6.64386	6.64386	6.64386		-0.114086	2.61788	0	0	0
ConA	344		GlcNAca1-4Galb1-4GlcNAcb1-3Galb1-4GlcNAcb-Sp0	1225.28	491.726	37.5695	2.39575	-1.82895	-7.82775		10.2589	8.94171	6.64386	6.64386	6.64386	6.64386		1.31719	2.29786	0	0	0
ConA	339		GlcNAca1-4Galb1-4GlcNAcb1-3Galb1-4GlcNAcb1-3Galb1-4GlcNAcb-Sp0	2110.64	436.591	34.582	3.6334	7.26925	-1.71705		11.0435	8.77014	6.64386	6.64386	6.64386	6.64386		2.27333	2.12628	0	0	0
ConA	201		G-ol-Sp8	-46.3896	91.8573	63.9699	5.16062	3.92595	24.1068		6.64386	6.64386	6.64386	6.64386	6.64386	6.64386		0	0	0	0	0
ConA	95		GalNAcb1-3GalNAca-Sp8	-30.3588	83.4032	-0.511675	5.96135	11.6813	10.8868		6.64386	6.64386	6.64386	6.64386	6.64386	6.64386		0	0	0	0	0
ConA	441		Galb1-6Galb-Sp10	-38.7567	72.8624	50.185	3.83425	-6.82845	8.40488		6.64386	6.64386	6.64386	6.64386	6.64386	6.64386		0	0	0	0	0
ConA	338		Neu5Aca2-3Galb1-4(Fuca1-3)GlcNAcb1-6(Neu5Aca2-3Galb1-3)GalNAc-Sp14	11.8963	68.1677	65.5984	14.2357	18.5507	42.8419		6.64386	6.64386	6.64386	6.64386	6.64386	6.64386		0	0	0	0	0
ConA	308		GlcAb1-3GlcNAcb-Sp8	-143.21	58.497	-5.37	2.95477	3.11283	4.99798		6.64386	6.64386	6.64386	6.64386	6.64386	6.64386		0	0	0	0	0
ConA	393		GalNAcb1-4(Neu5Aca2-3)Galb1-4GlcNAcb1-3GalNAca-Sp14	99.3476	40.7754	141.296	45.5142	36.3541	50.7024		6.64386	6.64386	7.14258	6.64386	6.64386	6.64386		0	-0.49872	0.49872	0	0
ConA	301		Galb1-3Galb1-4GlcNAcb-Sp8	335.095	31.7217	26.4313	9.04975	3.48297	12.6519		8.38843	6.64386	6.64386	6.64386	6.64386	6.64386		1.74457	0	0	0	0
ConA	409		GalNAcb1-3Gala1-6Galb1-4Glcb-Sp8	-19.5199	28.0625	20.3614	0.6846	-3.37737	-2.34558		6.64386	6.64386	6.64386	6.64386	6.64386	6.64386		0	0	0	0	0
ConA	203		GlcAb-Sp8	-12.228	15.2147	145.792	51.3512	18.8435	61.6503		6.64386	6.64386	7.18776	6.64386	6.64386	6.64386		0	-0.543907	0.543907	0	0
ConA	175		GlcNAca1-6Galb1-4GlcNAcb-Sp8	96.7994	11.8016	-0.0345	-3.86715	-2.4794	13.7417		6.64386	6.64386	6.64386	6.64386	6.64386	6.64386		0	0	0	0	0
ConA	323		Neu5Aca2-8Neu5Aca2-8Neu5Acb-Sp8	-33.5001	9.58403	3.22297	0.99805	0.468175	0.1212		6.64386	6.64386	6.64386	6.64386	6.64386	6.64386		0	0	0	0	0
ConA	413		Neu5Aca2-3Galb1-3GalNAcb1-4(Neu5Aca2-8Neu5Aca2-3)Galb1-4Glcb-Sp0	14.6554	9.11485	46.2801	6.28305	-2.62445	11.2382		6.64386	6.64386	6.64386	6.64386	6.64386	6.64386		0	0	0	0	0
ConA	318		Neu5Aca2-3Galb1-4GlcNAcb1-6(Neu5Aca2-3Galb1-3)GalNAca-Sp14	79.4628	8.41583	39.8454	1.37322	-3.14193	3.52113		6.64386	6.64386	6.64386	6.64386	6.64386	6.64386		0	0	0	0	0
ConA	554		Neu5Aca2-8Neu5Gca2-3Galb1-4GlcNAc-Sp0	-23.185	5.51132	10.5708	-6.9168	-7.13563	1.23453		6.64386	6.64386	6.64386	6.64386	6.64386	6.64386		0	0	0	0	0
ConA	178		GlcNAcb1-6(GlcNAcb1-3)GalNAca-Sp14	-16.6666	4.0194	2.57722	-0.75695	2.29165	-4.99625		6.64386	6.64386	6.64386	6.64386	6.64386	6.64386		0	0	0	0	0
ConA	89		GlcNAcb1-3Galb1-3GalNAca-Sp8	-20.6274	3.5061	29.0962	8.6535	2.88477	5.74173		6.64386	6.64386	6.64386	6.64386	6.64386	6.64386		0	0	0	0	0
ConA	322		Neu5Aca2-8Neu5Acb-Sp17	53.3191	2.12535	10.6977	3.01013	4.2633	2.4855		6.64386	6.64386	6.64386	6.64386	6.64386	6.64386		0	0	0	0	0
ConA	187		GlcNAcb1-4-MDPLys	257.045	1.65283	15.6148	4.78065	1.73113	-0.0366		8.00588	6.64386	6.64386	6.64386	6.64386	6.64386		1.36202	0	0	0	0
ConA	158		Galb1-4GalNAca1-3(Fuca1-2)Galb1-4GlcNAcb-Sp8	44.8635	-0.563925	13.7373	3.74833	0.215375	-4.30483		6.64386	6.64386	6.64386	6.64386	6.64386	6.64386		0	0	0	0	0
ConA	182		GlcNAcb1-3Galb-Sp8	10.3443	-1.7833	34.4786	4.00862	1.0798	-5.15115		6.64386	6.64386	6.64386	6.64386	6.64386	6.64386		0	0	0	0	0
ConA	21		GlcNAcb1-6(GlcNAcb1-4)(GlcNAcb1-3)GlcNAc-Sp8	-32.9401	-3.68348	12.99	1.82975	-2.06168	5.2017		6.64386	6.64386	6.64386	6.64386	6.64386	6.64386		0	0	0	0	0
ConA	200		Glcb1-6Glcb-Sp8	17.9368	-6.79072	78.6995	-2.298	5.79457	7.68777		6.64386	6.64386	6.64386	6.64386	6.64386	6.64386		0	0	0	0	0
ConA	557		Neu5Gca2-8Neu5Gca2-6Galb1-4GlcNAc-Sp0	-49.1966	-8.0372	-0.3538	2.65852	3.05642	19.5337		6.64386	6.64386	6.64386	6.64386	6.64386	6.64386		0	0	0	0	0
ConA	276		Neu5Aca2-8Neu5Aca-Sp8	-30.1154	-8.20625	15.8632	8.56135	-2.74008	-0.2902		6.64386	6.64386	6.64386	6.64386	6.64386	6.64386		0	0	0	0	0
ConA	286		Neu5Gca2-6GalNAca-Sp0	-45.1291	-8.47147	13.5814	-3.78675	4.86025	13.8265		6.64386	6.64386	6.64386	6.64386	6.64386	6.64386		0	0	0	0	0
ConA	556		Neu5Gca2-8Neu5Gca2-3Galb1-4GlcNAcb1-3Galb1-4GlcNAc-Sp0	-35.5633	-8.86175	-7.41135	3.17127	-2.98665	-7.20372		6.64386	6.64386	6.64386	6.64386	6.64386	6.64386		0	0	0	0	0
ConA	242		Neu5Aca2-3Galb1-4(Neu5Aca2-3Galb1-3)GlcNAcb-Sp8	-18.4459	-10.557	-11.9006	-7.59905	-0.51365	-4.5364		6.64386	6.64386	6.64386	6.64386	6.64386	6.64386		0	0	0	0	0
ConA	558		Neu5Aca2-8Neu5Aca2-3Galb1-4GlcNAc-Sp0	-31.7169	-10.7283	18.6447	3.94758	-6.11937	0.010925		6.64386	6.64386	6.64386	6.64386	6.64386	6.64386		0	0	0	0	0
ConA	313		MurNAcb1-4GlcNAcb-Sp10	-61.398	-11.1504	0.612325	-4.9141	1.93725	-1.50578		6.64386	6.64386	6.64386	6.64386	6.64386	6.64386		0	0	0	0	0
ConA	167		Galb1-4GlcNAcb1-6(Galb1-3)GalNAca-Sp8	-77.1623	-11.5863	9.82885	1.7507	10.2888	5.03852		6.64386	6.64386	6.64386	6.64386	6.64386	6.64386		0	0	0	0	0
ConA	159		Galb1-4GalNAcb1-3(Fuca1-2)Galb1-4GlcNAcb-Sp8	-7.6924	-12.3512	83.9034	-1.53722	3.42738	1.29395		6.64386	6.64386	6.64386	6.64386	6.64386	6.64386		0	0	0	0	0
ConA	176		GlcNAcb1-2Galb1-3GalNAca-Sp8	-69.4563	-12.7409	21.4232	0.7688	3.80702	-2.2898		6.64386	6.64386	6.64386	6.64386	6.64386	6.64386		0	0	0	0	0
ConA	357		KDNa2-3Galb1-4(Fuca1-3)GlcNAc-Sp0	-81.8905	-12.9916	78.9308	6.16815	-8.49555	7.35605		6.64386	6.64386	6.64386	6.64386	6.64386	6.64386		0	0	0	0	0
ConA	299		(6P)Glcb-Sp10	-60.0829	-13.1032	102.406	6.52435	4.62852	18.326		6.64386	6.64386	6.67816	6.64386	6.64386	6.64386		0	-0.0342992	0.0342992	0	0
ConA	80		Fuca1-3GlcNAcb-Sp8	-42.3915	-15.709	15.052	-0.9551	-3.25948	2.9118		6.64386	6.64386	6.64386	6.64386	6.64386	6.64386		0	0	0	0	0
ConA	300		Neu5Aca2-3Galb1-4(Fuca1-3)GlcNAcb1-6(Galb1-3)GalNAca-Sp14	92.7606	-15.9498	119.307	20.6759	9.4443	32.721		6.64386	6.64386	6.89854	6.64386	6.64386	6.64386		0	-0.254683	0.254683	0	0
ConA	171		Galb1-4GlcNAcb-Sp23	-5.9767	-16.1823	8.00055	6.7787	1.01853	3.58357		6.64386	6.64386	6.64386	6.64386	6.64386	6.64386		0	0	0	0	0
ConA	553		Neu5Gca2-8Neu5Gca2-3Galb1-4GlcNAc-Sp0	-18.9805	-16.2452	13.2215	-1.90735	2.9804	-13.4886		6.64386	6.64386	6.64386	6.64386	6.64386	6.64386		0	0	0	0	0
ConA	610		GlcNAcb1-3Fuca-Sp21	-42.1478	-16.3926	37.6523	-7.56902	-7.08085	-14.923		6.64386	6.64386	6.64386	6.64386	6.64386	6.64386		0	0	0	0	0
ConA	310		GlcNAcb1-3Man-Sp10	-174.411	-19.3044	9.62865	1.69672	19.2065	9.92307		6.64386	6.64386	6.64386	6.64386	6.64386	6.64386		0	0	0	0	0
ConA	307		GalNAcb1-3Galb-Sp8	47.0145	-20.634	12.3124	6.641	-2.74077	-0.676		6.64386	6.64386	6.64386	6.64386	6.64386	6.64386		0	0	0	0	0
ConA	470		Glca1-6Glca1-6Glca1-6Glcb-Sp10	-107.846	-21.014	76.7057	-2.1803	13.45	8.73608		6.64386	6.64386	6.64386	6.64386	6.64386	6.64386		0	0	0	0	0
ConA	280		Neu5Acb2-6Galb1-4GlcNAcb-Sp8	119.655	-21.0877	174.861	-1.04285	-5.94635	4.69057		6.90274	6.64386	7.45007	6.64386	6.64386	6.64386		0.258881	-0.80621	0.80621	0	0
ConA	94		GalNAca1-4(Fuca1-2)Galb1-4GlcNAcb-Sp8	99.5726	-21.4167	1.681	-2.2634	-1.2163	-6.82772		6.63768	6.64386	6.64386	6.64386	6.64386	6.64386		-0.00617893	0	0	0	0
ConA	82		Fucb1-3GlcNAcb-Sp8	-27.5152	-21.6084	8.27375	-3.43032	0.330275	5.0705		6.64386	6.64386	6.64386	6.64386	6.64386	6.64386		0	0	0	0	0
ConA	275		Neu5Aca2-6Galb-Sp8	-14.3287	-22.7029	24.2487	1.19192	2.90002	14.1018		6.64386	6.64386	6.64386	6.64386	6.64386	6.64386		0	0	0	0	0
ConA	268		Neu5Aca2-6Galb1-4(6S)GlcNAcb-Sp8	-66.8467	-23.8567	67.1887	-1.5918	-6.23232	-4.70473		6.64386	6.64386	6.64386	6.64386	6.64386	6.64386		0	0	0	0	0
ConA	220		(3S)Galb1-4(Fuca1-3)(6S)GlcNAcb-Sp8	273.676	-24.8245	74.6198	5.06898	0.261425	8.9486		8.09633	6.64386	6.64386	6.64386	6.64386	6.64386		1.45247	0	0	0	0
ConA	188		GlcNAcb1-6(GlcNAcb1-4)GalNAca-Sp8	-32.2896	-26.6305	26.8734	0.80865	0.616475	-2.39705		6.64386	6.64386	6.64386	6.64386	6.64386	6.64386		0	0	0	0	0
ConA	555		Neu5Gca2-8Neu5Aca2-3Galb1-4GlcNAc-Sp0	-25.3851	-30.13	107.33	-6.595	3.70237	-3.62888		6.64386	6.64386	6.74591	6.64386	6.64386	6.64386		0	-0.102051	0.102051	0	0
ConA	147		Galb1-3Galb-Sp8	676.045	-31.2023	11.1896	4.23857	-4.29605	-9.28383		9.40098	6.64386	6.64386	6.64386	6.64386	6.64386		2.75712	0	0	0	0
ConA	124		Gala1-4GlcNAcb-Sp8	596.418	-33.2254	22.3227	-6.17957	3.4351	0.152375		9.22018	6.64386	6.64386	6.64386	6.64386	6.64386		2.57632	0	0	0	0
ConA	205		GlcAb1-6Galb-Sp8	77.5184	-33.2572	78.9846	11.0787	6.37898	34.9994		6.64386	6.64386	6.64386	6.64386	6.64386	6.64386		0	0	0	0	0
ConA	289		Neu5Aca2-3Galb1-4GlcNAcb1-6(Galb1-3)GalNAca-Sp14	432.975	-34.3091	-6.278	-7.5103	-9.8628	-3.15103		8.75814	6.64386	6.64386	6.64386	6.64386	6.64386		2.11428	0	0	0	0
ConA	356		(6S)GlcNAcb1-3Galb1-4GlcNAcb-Sp0	-104.969	-34.9256	18.7462	-4.82283	6.601	10.9972		6.64386	6.64386	6.64386	6.64386	6.64386	6.64386		0	0	0	0	0
ConA	48		Neu5,9Ac2a-Sp8	9.97167	-35.7866	-5.1486	-3.72895	3.68887	-2.75955		6.64386	6.64386	6.64386	6.64386	6.64386	6.64386		0	0	0	0	0
ConA	443		GalNAcb1-6GalNAcb-Sp8	-115.807	-36.8029	-7.87613	-7.5388	-7.006	-12.4857		6.64386	6.64386	6.64386	6.64386	6.64386	6.64386		0	0	0	0	0
ConA	96		GalNAcb1-3(Fuca1-2)Galb-Sp8	12.182	-37.2412	-1.43883	7.07015	-3.25635	-0.31515		6.64386	6.64386	6.64386	6.64386	6.64386	6.64386		0	0	0	0	0
ConA	49		Neu5,9Ac2a2-6Galb1-4GlcNAcb-Sp8	-21.1426	-37.5765	32.4275	-2.8562	-2.66613	-9.44253		6.64386	6.64386	6.64386	6.64386	6.64386	6.64386		0	0	0	0	0
ConA	98		GalNAcb1-4(Fuca1-3)GlcNAcb-Sp0	-99.6106	-38.7785	17.685	24.9745	11.347	4.11917		6.64386	6.64386	6.64386	6.64386	6.64386	6.64386		0	0	0	0	0
ConA	288		Neu5Gca-Sp8	-35.3373	-39.755	34.2071	2.23903	8.44933	3.84055		6.64386	6.64386	6.64386	6.64386	6.64386	6.64386		0	0	0	0	0
ConA	570		(3S)GlcAb1-3Galb1-4GlcNAcb1-3Galb1-4Glc-Sp0	-85.8724	-40.05	26.5278	-10.8074	7.72255	-8.70713		6.64386	6.64386	6.64386	6.64386	6.64386	6.64386		0	0	0	0	0
ConA	195		GlcNAcb1-6Galb1-4GlcNAcb-Sp8	-108.291	-40.6157	-2.6667	4.71165	2.82657	5.82013		6.64386	6.64386	6.64386	6.64386	6.64386	6.64386		0	0	0	0	0
ConA	81		Fuca1-4GlcNAcb-Sp8	-86.3448	-42.2139	-2.1454	-5.77542	-4.99757	-9.17055		6.64386	6.64386	6.64386	6.64386	6.64386	6.64386		0	0	0	0	0
ConA	504		GalNAcb1-4(Fuca1-3)(6S)GlcNAcb-Sp8	-67.7925	-43.3602	-3.32257	-0.33045	-5.4151	-0.66445		6.64386	6.64386	6.64386	6.64386	6.64386	6.64386		0	0	0	0	0
ConA	368		Neu5Aca2-6GlcNAcb1-4GlcNAcb1-4GlcNAc-Sp21	-54.9722	-44.171	20.6943	1.2214	-2.42437	-9.10922		6.64386	6.64386	6.64386	6.64386	6.64386	6.64386		0	0	0	0	0
ConA	174		GlcNAca1-3Galb1-4GlcNAcb-Sp8	-27.6421	-44.3006	3.43102	-3.56842	-4.73072	7.77345		6.64386	6.64386	6.64386	6.64386	6.64386	6.64386		0	0	0	0	0
ConA	536		GlcNAcb1-3Galb1-4GlcNAcb1-6(GlcNAcb1-3)Galb1-4GlcNAc-Sp0	-10.6844	-46.0955	-11.4214	-4.92268	-3.08535	4.83737		6.64386	6.64386	6.64386	6.64386	6.64386	6.64386		0	0	0	0	0
ConA	126		Galb1-2Galb-Sp8	733.226	-47.1526	44.4497	9.33402	-6.45045	3.61082		9.51811	6.64386	6.64386	6.64386	6.64386	6.64386		2.87426	0	0	0	0
ConA	230		Neu5Aca2-8Neu5Aca2-8Neu5Aca-Sp8	-46.1572	-47.3113	19.812	2.894	-8.34653	-1.21417		6.64386	6.64386	6.64386	6.64386	6.64386	6.64386		0	0	0	0	0
ConA	110		Gala1-4(Gala1-3)Galb1-4GlcNAcb-Sp8	-0.8513	-48.8512	2.64085	3.42895	12.6185	14.7936		6.64386	6.64386	6.64386	6.64386	6.64386	6.64386		0	0	0	0	0
ConA	567		GlcNAb1-3Galb1-3GalNAc-Sp14	-93.3542	-50.7892	46.3772	-4.44553	-6.8555	2.76365		6.64386	6.64386	6.64386	6.64386	6.64386	6.64386		0	0	0	0	0
ConA	133		Galb1-4GlcNAcb1-6GalNAc-Sp14	18.9527	-51.0779	34.3865	8.56922	19.9273	15.2053		6.64386	6.64386	6.64386	6.64386	6.64386	6.64386		0	0	0	0	0
ConA	120		Gala1-4(Fuca1-2)Galb1-4GlcNAcb-Sp8	95.4133	-59.0376	36.5228	-4.82078	9.31235	7.13195		6.64386	6.64386	6.64386	6.64386	6.64386	6.64386		0	0	0	0	0
ConA	204		GlcAb1-3Galb-Sp8	15.4506	-59.7987	33.8946	16.11	4.9726	8.5453		6.64386	6.64386	6.64386	6.64386	6.64386	6.64386		0	0	0	0	0
ConA	189		GlcNAcb1-4Galb1-4GlcNAcb-Sp8	-272.213	-61.8207	-22.0116	-5.24915	-3.11742	-14.5975		6.64386	6.64386	6.64386	6.64386	6.64386	6.64386		0	0	0	0	0
ConA	449		Galb1-4GlcNAcb1-2Mana-Sp0	37.4115	-62.9744	-2.42998	-27.0223	-5.85093	-4.6458		6.64386	6.64386	6.64386	6.64386	6.64386	6.64386		0	0	0	0	0
ConA	563		GalNAcb1-3GlcNAcb-Sp0	-90.9354	-63.5168	-14.4924	-16.6188	-11.324	-7.1014		6.64386	6.64386	6.64386	6.64386	6.64386	6.64386		0	0	0	0	0
ConA	431		Fuca1-3GlcNAcb1-6(Galb1-4GlcNAcb1-3)Galb1-4Glc-Sp21	-148.3	-72.7617	4.52252	-9.27275	-1.66542	1.75065		6.64386	6.64386	6.64386	6.64386	6.64386	6.64386		0	0	0	0	0
ConA	179		GlcNAcb1-6(GlcNAcb1-3)Galb1-4GlcNAcb-Sp8	51.8301	-78.1366	15.2632	-9.11672	-6.61495	-1.60067		6.64386	6.64386	6.64386	6.64386	6.64386	6.64386		0	0	0	0	0
ConA	168		Galb1-4GlcNAcb1-6(Galb1-3)GalNAc-Sp14	354.343	-79.7183	2.21122	-1.87755	-1.4095	-3.12655		8.469	6.64386	6.64386	6.64386	6.64386	6.64386		1.82515	0	0	0	0
ConA	367		Neu5Aca2-6GlcNAcb1-4GlcNAc-Sp21	-66.5412	-87.6824	-8.45323	-3.94845	-8.96075	-12.3999		6.64386	6.64386	6.64386	6.64386	6.64386	6.64386		0	0	0	0	0
ConA	599		GlcNAcb1-3Galb1-4GlcNAcb1-3Galb1-4GlcNAcb1-3GalNAca-Sp14	77.7812	-95.5232	-12.8181	-3.19045	-3.45168	-0.377375		6.64386	6.64386	6.64386	6.64386	6.64386	6.64386		0	0	0	0	0
ConA	571		(3S)GlcAb1-3Galb1-4GlcNAcb1-2Mana-Sp0	46.6014	-103.321	62.2599	-6.21978	-9.31592	-11.3724		6.64386	6.64386	6.64386	6.64386	6.64386	6.64386		0	0	0	0	0
ConA	562		GlcNAcb1-3Galb1-4GlcNAcb1-6(GlcNAcb1-3Galb1-3)GalNAca-Sp14	-240.491	-115.514	133	-17.7429	6.32573	-17.902		6.64386	6.64386	7.05529	6.64386	6.64386	6.64386		0	-0.411431	0.411431	0	0
ConA	505		(3S)GalNAcb1-4(Fuca1-3)GlcNAcb-Sp8	155.112	-129.468	82.6921	-7.52372	-5.05033	-9.38993		7.27716	6.64386	6.64386	6.64386	6.64386	6.64386		0.633307	0	0	0	0
HPA	84	2'F-A type 2	GalNAca1-3(Fuca1-2)Galb1-4(Fuca1-3)GlcNAcb-Sp0	16400.9		17333.8	15575.5	4069.69			14.0015		14.0813	13.927	11.9907					0.154304	1.93629
HPA	104	2'F-B type 2	Gala1-3(Fuca1-2)Galb1-4(Fuca1-3)GlcNAcb-Sp0	7.60237		17.1412	35.2746	7.42432			6.64386		6.64386	6.64386	6.64386					0	0
HPA	105	2'F-B type 2	Gala1-3(Fuca1-2)Galb1-4(Fuca1-3)GlcNAcb-Sp8	-2.33923		9.53043	10.7567	3.76477			6.64386		6.64386	6.64386	6.64386					0	0
HPA	78	2'FL (BG-H6)	Fuca1-2Galb1-4Glcb-Sp0	3.34552		9.63398	-0.107025	2.0118			6.64386		6.64386	6.64386	6.64386					0	0
HPA	514	3,3'-Di-Su-LDN	(3S)GalNAcb1-4(3S)GlcNAc-Sp8	-7.41923		0.062025	0.80865	10.9164			6.64386		6.64386	6.64386	6.64386					0	0
HPA	297	3',4'-di-Su-LacNAc	4S(3S)Galb1-4GlcNAcb-Sp0	-1.45177		9.26223	7.58195	4.3801			6.64386		6.64386	6.64386	6.64386					0	0
HPA	245	3'6-diSialyl-TF	Neu5Aca2-6(Neu5Aca2-3Galb1-3)GalNAca-Sp14	2.8101		14.5666	7.2929	19.8877			6.64386		6.64386	6.64386	6.64386					0	0
HPA	244	3'6-diSialyl-TF	Neu5Aca2-6(Neu5Aca2-3Galb1-3)GalNAca-Sp8	-4.4546		2.8109	3.34065	5.734			6.64386		6.64386	6.64386	6.64386					0	0
HPA	185	3'GN-Di-LacNAc	GlcNAcb1-3Galb1-4GlcNAcb1-3Galb1-4GlcNAcb-Sp0	-0.071425		3.1776	9.30558	9.72448			6.64386		6.64386	6.64386	6.64386					0	0
HPA	359	3'KDN-Lac	KDNa2-3Galb1-4Glc-Sp0	4.71373		15.0156	6.62805	18.9339			6.64386		6.64386	6.64386	6.64386					0	0
HPA	207	3'KDNLacNAc	KDNa2-3Galb1-4GlcNAcb-Sp0	-1.03705		12.3387	9.32897	8.84875			6.64386		6.64386	6.64386	6.64386					0	0
HPA	206	3'-KDNLec	KDNa2-3Galb1-3GlcNAcb-Sp0	-0.547025		5.96122	12.3952	6.82817			6.64386		6.64386	6.64386	6.64386					0	0
HPA	284	3'S(Gc)LacNAc	Neu5Gca2-3Galb1-4GlcNAcb-Sp0	1.94583		2.95547	3.1504	14.2779			6.64386		6.64386	6.64386	6.64386					0	0
HPA	544	3'S(Gc)LacNAc--	Neu5Gca2-3Galb1-4GlcNAcb1-3Galb1-4GlcNAcb1-2Mana1-6(Neu5Gca2-3Galb1-4GlcNAcb1-3Galb1-4GlcNAcb1-2Mana1-3)Manb1-4GlcNAcb1-4GlcNAcb-Sp24	1.58528		14.6459	11.024	8.14593			6.64386		6.64386	6.64386	6.64386					0	0
HPA	282	3'S(Gc)LeC	Neu5Gca2-3Galb1-3GlcNAcb-Sp0	4.85208		7.93162	11.3915	12.1048			6.64386		6.64386	6.64386	6.64386					0	0
HPA	605	3'S-core2	GlcNAcb1-6(Neu5Aca2-3Galb1-3)GalNAca-Sp14	0.279375		10.3747	6.62447	0.934075			6.64386		6.64386	6.64386	6.64386					0	0
HPA	262	3'S-Di-LacNAc	Neu5Aca2-3Galb1-4GlcNAcb1-3Galb1-4GlcNAcb-Sp0	-0.880925		6.18018	9.80995	11.7861			6.64386		6.64386	6.64386	6.64386					0	0
HPA	237	3'SGalNAc	Neu5Aca2-3GalNAca-Sp8	-6.83563		6.29683	8.536	-3.3718			6.64386		6.64386	6.64386	6.64386					0	0
HPA	261	3'SLacNAc	Neu5Aca2-3Galb1-4GlcNAcb-Sp8	0.12075		5.27815	5.71975	15.5549			6.64386		6.64386	6.64386	6.64386					0	0
HPA	260	3'SLacNAc	Neu5Aca2-3Galb1-4GlcNAcb-Sp0	-2.46293		12.2542	12.9488	7.6384			6.64386		6.64386	6.64386	6.64386					0	0
HPA	601	3'SLacNAc--	Neu5Aca2-3Galb1-4GlcNAcb1-3Galb1-4GlcNAcb1-6(Galb1-3)GalNAca-Sp14	-7.63698		13.9815	21.8679	20.5642			6.64386		6.64386	6.64386	6.64386					0	0
HPA	597	3'SLacNAc--	Neu5Aca2-3Galb1-4GlcNAcb1-3Galb1-4GlcNAcb1-6(Neu5Aca2-3Galb1-4GlcNAcb1-3Galb1-4GlcNAcb1-3)GalNAca-Sp14	-2.84395		8.5896	24.8595	17.6468			6.64386		6.64386	6.64386	6.64386					0	0
HPA	472	3'SLacNAc--	Neu5Aca2-3Galb1-4GlcNAcb1-6(Neu5Aca2-3Galb1-4GlcNAcb1-3)GalNAca-Sp14	-0.96485		5.6488	4.76765	2.51802			6.64386		6.64386	6.64386	6.64386					0	0
HPA	480	3'SLacNAc--	Neu5Aca2-3Galb1-4GlcNAcb1-6GalNAca-Sp14	-11.3211		11.1977	-5.07177	0.951275			6.64386		6.64386	6.64386	6.64386					0	0
HPA	593	3'SLacNAc--	Neu5Aca2-3Galb1-4GlcNAcb1-3Galb1-4GlcNAcb1-3GalNAca-Sp14	-3.81245		2.30258	-0.837225	-0.3511			6.64386		6.64386	6.64386	6.64386					0	0
HPA	608	3'SLacNAc --	Neu5Aca2-3Galb1-4GlcNAcb1-3Galb1-4GlcNAcb1-3Galb1-4GlcNAcb1-2Mana1-6(Neu5Aca2-3Galb1-4GlcNAcb1-3Galb1-4GlcNAcb1-3Galb1-4GlcNAcb1-2Mana1-3)Manb1-4GlcNAcb1-4GlcNAcb-Sp12	124.681		163.414	163.618	174.699			6.9621		7.35239	7.35419	7.44873					-0.00180231	-0.0945423
HPA	604	3'SLacNAc --	Neu5Aca2-3Galb1-4GlcNAcb1-3Galb1-4GlcNAcb1-2Mana1-6(Neu5Aca2-3Galb1-4GlcNAcb1-3Galb1-4GlcNAcb1-2Mana1-3)Manb1-4GlcNAcb1-4GlcNAcb-Sp12	66.5934		97.3048	94.4471	115.862			6.64386		6.64386	6.64386	6.85626					0	-0.212407
HPA	378	3'SLacNAc --	Neu5Aca2-6Galb1-4GlcNAcb1-3GalNAc-Sp14	71.0014		47.4389	13.655	21.1125			6.64386		6.64386	6.64386	6.64386					0	0
HPA	479	3'SLacNAc --	Neu5Aca2-3Galb1-4GlcNAcb1-2Mana-Sp0	21.4375		45.4549	38.6926	16.4192			6.64386		6.64386	6.64386	6.64386					0	0
HPA	377	3'SLacNAc --	Neu5Aca2-3Galb1-4GlcNAcb1-3GalNAc-Sp14	-7.576		6.10365	15.9541	11.381			6.64386		6.64386	6.64386	6.64386					0	0
HPA	481	3'SLacNAc --	Neu5Aca2-6Galb1-4GlcNAcb1-6GalNAca-Sp14	0.23295		16.1493	5.169	6.52915			6.64386		6.64386	6.64386	6.64386					0	0
HPA	252	3'SLacNAc(6Su)	Neu5Aca2-3Galb1-4(6S)GlcNAcb-Sp8	-1.99487		10.0161	5.19102	4.94082			6.64386		6.64386	6.64386	6.64386					0	0
HPA	46	3'SLacNAc(6'Su)	Neu5Aca2-3(6S)Galb1-4GlcNAcb-Sp8	-0.38585		13.1892	11.3707	8.49223			6.64386		6.64386	6.64386	6.64386					0	0
HPA	296	3'SLacNAc-LeC	Neu5Aca2-3Galb1-4GlcNAcb1-3Galb1-3GlcNAcb-Sp0	-1.6289		4.8313	6.2795	7.22318			6.64386		6.64386	6.64386	6.64386					0	0
HPA	219	3'SLacNAc-LeX	Neu5Aca2-3Galb1-4GlcNAcb1-3Galb1-4(Fuca1-3)GlcNAcb-Sp0	-4.37387		6.43775	6.91925	7.46722			6.64386		6.64386	6.64386	6.64386					0	0
HPA	238	3'SLDN	Neu5Aca2-3GalNAcb1-4GlcNAcb-Sp0	-6.22635		6.0785	7.10227	6.2598			6.64386		6.64386	6.64386	6.64386					0	0
HPA	251	3'SLeC	Neu5Aca2-3Galb1-3GlcNAcb-Sp8	-0.68285		8.81203	5.35097	9.59638			6.64386		6.64386	6.64386	6.64386					0	0
HPA	250	3'SLeC	Neu5Aca2-3Galb1-3GlcNAcb-Sp0	0.720825		9.81183	5.654	8.71393			6.64386		6.64386	6.64386	6.64386					0	0
HPA	400	3'SLeC--	Neu5Aca2-3Galb1-3GlcNAcb1-3GalNAca-Sp14	2.31037		16.7746	6.66667	12.6863			6.64386		6.64386	6.64386	6.64386					0	0
HPA	475	3'SLeC--	Neu5Aca2-3Galb1-3GlcNAcb1-6(Neu5Aca2-3Galb1-4GlcNAcb1-2)Mana1-6(Neu5Aca2-3Galb1-3GlcNAcb1-2Mana1-3)Manb1-4GlcNAcb1-4GlcNAcb-Sp19	2.36887		25.6713	20.0364	12.0655			6.64386		6.64386	6.64386	6.64386					0	0
HPA	527	3'SLeC--	Neu5Aca2-3Galb1-3GlcNAcb1-2Mana-Sp0	-4.51712		3.4824	5.08175	7.13063			6.64386		6.64386	6.64386	6.64386					0	0
HPA	487	3'SLeC--	Neu5Aca2-3Galb1-3GlcNAcb1-2Mana1-6(GlcNAcb1-4)(Neu5Aca2-3Galb1-3GlcNAcb1-2Mana1-3)Manb1-4GlcNAcb1-4GlcNAc-Sp21	-5.026		6.37738	11.8932	3.9862			6.64386		6.64386	6.64386	6.64386					0	0
HPA	492	3'SLeC--	Neu5Aca2-3Galb1-3GlcNAcb1-6GalNAca-Sp14	-3.41077		3.63922	12.3003	0.9924			6.64386		6.64386	6.64386	6.64386					0	0
HPA	530	3'SLeC--	Neu5Aca2-3Galb1-3GlcNAcb1-4Galb1-4Glcb-Sp0	-10.0239		12.6172	2.4603	-3.57717			6.64386		6.64386	6.64386	6.64386					0	0
HPA	239	3'SLeC(6Su)	Neu5Aca2-3Galb1-3(6S)GlcNAc-Sp8	8.5697		22.6972	29.7261	28.6451			6.64386		6.64386	6.64386	6.64386					0	0
HPA	295	3'SLeC-LeC	Neu5Aca2-3Galb1-3GlcNAcb1-3Galb1-3GlcNAcb-Sp0	5.0197		7.83035	19.6737	12.2865			6.64386		6.64386	6.64386	6.64386					0	0
HPA	225	3'STF	Neu5Aca2-3Galb1-3GalNAca-Sp14	5.49287		9.3063	5.09875	4.93838			6.64386		6.64386	6.64386	6.64386					0	0
HPA	224	3'STF	Neu5Aca2-3Galb1-3GalNAca-Sp8	18.8523		21.2825	7.17458	-0.13015			6.64386		6.64386	6.64386	6.64386					0	0
HPA	243	3'STF(6Su)	Neu5Aca2-3Galb1-3(6S)GalNAca-Sp8	-4.74598		2.23957	15.0775	3.0712			6.64386		6.64386	6.64386	6.64386					0	0
HPA	259	3'S-Tri-LacNAc	Neu5Aca2-3Galb1-4GlcNAcb1-3Galb1-4GlcNAcb1-3Galb1-4GlcNAcb-Sp0	-0.06385		4.54228	6.36585	18.4172			6.64386		6.64386	6.64386	6.64386					0	0
HPA	85	3'Su-FL	(3S)Galb1-4(Fuca1-3)Glcb-Sp0	1.21133		16.2896	9.36778	10.6605			6.64386		6.64386	6.64386	6.64386					0	0
HPA	516	3'Su-LDN	(3S)GalNAcb1-4GlcNAc-Sp8	-7.67455		2.0967	-6.76885	-2.9092			6.64386		6.64386	6.64386	6.64386					0	0
HPA	493	3'Su-LeA	(3S)Galb1-3(Fuca1-4)GlcNAcb-Sp0	0.353975		10.3433	11.8314	10.5596			6.64386		6.64386	6.64386	6.64386					0	0
HPA	32	3'-sulpho-LeX	(3S)Galb1-4(Fuca1-3)GlcNAc-Sp0	5.4429		11.7896	26.2431	17.8839			6.64386		6.64386	6.64386	6.64386					0	0
HPA	33	3'-sulpho-LeX	(3S)Galb1-4(Fuca1-3)GlcNAc-Sp8	-1.21715		6.67245	9.23972	6.548			6.64386		6.64386	6.64386	6.64386					0	0
HPA	298	4,6'-di-Su-LacNAc	(6S)Galb1-4(6S)GlcNAcb-Sp0	2.66752		15.1247	5.77455	1.62627			6.64386		6.64386	6.64386	6.64386					0	0
HPA	512	4',6'-Di-Su-LDN	(6S)(4S)GalNAcb1-4GlcNAc-Sp8	-9.2882		-2.32613	4.6102	2.06497			6.64386		6.64386	6.64386	6.64386					0	0
HPA	517	4'Su-GalNAc-b	(4S)GalNacb-Sp10	-8.14615		1.27997	3.27148	-0.251775			6.64386		6.64386	6.64386	6.64386					0	0
HPA	358	6'KDN-LacNAc	KDNa2-6Galb1-4GlcNAc-Sp0	4.1421		9.32912	3.1346	4.07235			6.64386		6.64386	6.64386	6.64386					0	0
HPA	518	6P-LacNAc	Galb1-4(6P)GlcNAcb-Sp0	-7.0624		5.37945	-7.55323	1.39682			6.64386		6.64386	6.64386	6.64386					0	0
HPA	519	6'P-LacNAc	(6P)Galb1-4GlcNAcb-SP0	-11.5765		5.93652	3.7764	1.41705			6.64386		6.64386	6.64386	6.64386					0	0
HPA	324	6'S(Gc)b2-6LacNAc	Neu5Gcb2-6Galb1-4GlcNAc-Sp8	0.82795		8.5939	8.27365	12.0443			6.64386		6.64386	6.64386	6.64386					0	0
HPA	287	6'S(Gc)LacNAc	Neu5Gca2-6Galb1-4GlcNAcb-Sp0	-3.43362		13.9809	6.45127	12.7646			6.64386		6.64386	6.64386	6.64386					0	0
HPA	503	6'S-6Su-LDN	Neu5Aca2-6GalNAcb1-4(6S)GlcNAcb-Sp8	-9.2225		10.1435	1.19725	3.72475			6.64386		6.64386	6.64386	6.64386					0	0
HPA	272	6'S-Di-LacNAc	Neu5Aca2-6Galb1-4GlcNAcb1-3Galb1-4GlcNAcb-Sp0	0.96325		8.27507	5.13783	10.4646			6.64386		6.64386	6.64386	6.64386					0	0
HPA	266	6'SGalNAc	Neu5Aca2-6GalNAca-Sp8	-3.673		5.62802	-0.605775	2.14692			6.64386		6.64386	6.64386	6.64386					0	0
HPA	273	6'SLac	Neu5Aca2-6Galb1-4Glcb-Sp0	0.4556		7.31887	9.18938	10.9099			6.64386		6.64386	6.64386	6.64386					0	0
HPA	274	6'SLac	Neu5Aca2-6Galb1-4Glcb-Sp8	2.695		5.47307	10.5694	6.37862			6.64386		6.64386	6.64386	6.64386					0	0
HPA	270	6'SLacNAc	Neu5Aca2-6Galb1-4GlcNAcb-Sp8	2.1505		7.1078	8.84577	7.19217			6.64386		6.64386	6.64386	6.64386					0	0
HPA	269	6'SLacNAc	Neu5Aca2-6Galb1-4GlcNAcb-Sp0	-1.25735		16.836	16.4041	4.88965			6.64386		6.64386	6.64386	6.64386					0	0
HPA	606	6'SLacNAc--	Neu5Aca2-6Galb1-4GlcNAcb1-3Galb1-4GlcNAcb1-6(Neu5Aca2-6Galb1-4GlcNAcb1-3Galb1-4GlcNAcb1-3)GalNAca-Sp14	87.7089		104.673	134.348	154.167			6.64386		6.70975	7.06983	7.26835					-0.360075	-0.19852
HPA	607	6'SLacNAc--	Neu5Aca2-6Galb1-4GlcNAcb1-3Galb1-4GlcNAcb1-3Galb1-4GlcNAcb1-2Mana1-6(Neu5Aca2-6Galb1-4GlcNAcb1-3Galb1-4GlcNAcb1-3Galb1-4GlcNAcb1-2Mana1-3)Manb1-4GlcNAcb1-4GlcNAcb-Sp12	66.6499		95.0867	99.6997	84.8389			6.64386		6.64386	6.63952	6.64386					0.00433893	-0.00433893
HPA	609	6'SLacNAc--	Neu5Aca2-6Galb1-4GlcNAcb1-3Galb1-4GlcNAcb1-2Mana1-6(Neu5Aca2-6Galb1-4GlcNAcb1-3Galb1-4GlcNAcb1-2Mana1-3)Manb1-4GlcNAcb1-4GlcNAcb-Sp12	27.6558		30.1053	17.8509	21.8001			6.64386		6.64386	6.64386	6.64386					0	0
HPA	603	6'SLacNAc--	Neu5Aca2-6Galb1-4GlcNAcb1-6(Galb1-3)GalNAca-Sp14	-7.77022		3.25035	4.63925	6.79747			6.64386		6.64386	6.64386	6.64386					0	0
HPA	602	6'SLacNAc--	Neu5Aca2-6Galb1-4GlcNAcb1-3Galb1-4GlcNAcb1-6(Galb1-3)GalNAca-Sp14	-7.51672		-0.334575	11.5155	6.0804			6.64386		6.64386	6.64386	6.64386					0	0
HPA	521	6'SLacNAc--	Neu5Aca2-6Galb1-4GlcNAcb1-2Man-Sp0	-5.29003		9.39155	-2.8425	-1.80617			6.64386		6.64386	6.64386	6.64386					0	0
HPA	482	6'SLacNAc --	Neu5Aca2-6Galb1-4 GlcNAcb1-6(Neu5Aca2-6Galb1-4GlcNAcb1-3)GalNAca-Sp14	-4.09003		20.657	1.1999	4.5406			6.64386		6.64386	6.64386	6.64386					0	0
HPA	598	6'SLacNAc (core 3)	Neu5Aca2-6Galb1-4GlcNAcb1-3Galb1-4GlcNAcb1-3GalNAca-Sp14	-14.0647		2.5279	3.03595	3.3464			6.64386		6.64386	6.64386	6.64386					0	0
HPA	478	6'SLacNAc/LeC	Neu5Aca2-6Galb1-4GlcNAcb1-6(Galb1-3GlcNAcb1-3)Galb1-4Glcb-Sp21	-14.0445		2.9977	8.03133	-0.022275			6.64386		6.64386	6.64386	6.64386					0	0
HPA	488	6'SLacNAc/LeY	Neu5Aca2-6Galb1-4GlcNAcb1-6(Fuca1-2Galb1-4(Fuca1-3)GlcNAcb1-3)Galb1-4Glc-Sp21	-7.4605		6.90822	-3.4371	8.59385			6.64386		6.64386	6.64386	6.64386					0	0
HPA	331	6'SLacNAc-LeC	Neu5Aca2-6Galb1-4GlcNAcb1-3Galb1-3GlcNAcb-Sp0	0.712325		7.80183	-1.06012	3.47342			6.64386		6.64386	6.64386	6.64386					0	0
HPA	271	6'SLacNAc-LeX-LeX	Neu5Aca2-6Galb1-4GlcNAcb1-3Galb1-4(Fuca1-3)GlcNAcb1-3Galb1-4(Fuca1-3)GlcNAcb-Sp0	7.33577		11.4086	13.6764	3.3909			6.64386		6.64386	6.64386	6.64386					0	0
HPA	267	6'SLDN	Neu5Aca2-6GalNAcb1-4GlcNAcb-Sp0	-2.89653		7.16308	10.5889	9.53535			6.64386		6.64386	6.64386	6.64386					0	0
HPA	137	6STF	Neu5Aca2-6(Galb1-3)GalNAca-Sp14	0.62585		5.49468	18.7417	17.1776			6.64386		6.64386	6.64386	6.64386					0	0
HPA	138	6STF	Neu5Acb2-6(Galb1-3)GalNAca-Sp8	-3.67092		15.4525	10.2997	3.38918			6.64386		6.64386	6.64386	6.64386					0	0
HPA	136	6STF	Neu5Aca2-6(Galb1-3)GalNAca-Sp8	0.319175		2.378	5.27813	-1.03483			6.64386		6.64386	6.64386	6.64386					0	0
HPA	333	6'S-Tri-LacNAc	Neu5Aca2-6Galb1-4GlcNAcb1-3Galb1-4GlcNAcb1-3Galb1-4GlcNAcb-Sp0	-1.93323		3.52352	8.76995	10.7498			6.64386		6.64386	6.64386	6.64386					0	0
HPA	292	6-su-3-FL	Galb1-4(Fuca1-3)(6S)Glcb-Sp0	8.02837		9.42953	18.445	13.417			6.64386		6.64386	6.64386	6.64386					0	0
HPA	498	6'Su-BG-H1	Fuca1-2(6S)Galb1-3GlcNAcb-Sp0	-13.8426		14.0641	-2.0498	2.49668			6.64386		6.64386	6.64386	6.64386					0	0
HPA	511	6Su-LacNAc	Galb1-3(6S)GlcNAcb-Sp8	-9.5383		1.6213	10.695	-3.23375			6.64386		6.64386	6.64386	6.64386					0	0
HPA	515	6Su-LDN	GalNAcb1-4(6S)GlcNAc-Sp8	-10.153		-5.06942	-0.026375	-5.6495			6.64386		6.64386	6.64386	6.64386					0	0
HPA	513	6'Su-LDN	(6S)GalNAcb1-4GlcNAc-Sp8	-10.823		1.08312	-2.03022	-3.65385			6.64386		6.64386	6.64386	6.64386					0	0
HPA	444	6'Su-LeC	(6S)Galb1-3GlcNAcb-Sp0	0.3702		6.94443	3.32345	-4.19343			6.64386		6.64386	6.64386	6.64386					0	0
HPA	291	6-su-LeX	Galb1-4(Fuca1-3)(6S)GlcNAcb-Sp0	3.56242		20.2502	12.5925	11.3969			6.64386		6.64386	6.64386	6.64386					0	0
HPA	329	9OAc3'SLacNAc	Neu5,9Ac2a2-3Galb1-4GlcNAcb-Sp0	4.2456		19.0159	22.3651	22.5035			6.64386		6.64386	6.64386	6.64386					0	0
HPA	330	9OAc3'SLeC	Neu5,9Ac2a2-3Galb1-4GlcNAcb-Sp0	-1.72875		6.8601	7.01053	9.87575			6.64386		6.64386	6.64386	6.64386					0	0
HPA	346	A1?	Neu5Aca2-6Galb1-4GlcNAcb1-2Mana1-6(Mana1-3)Manb1-4GlcNAcb1-4GlcNAc-Sp12	-4.0547		2.98998	3.84858	8.06963			6.64386		6.64386	6.64386	6.64386					0	0
HPA	349	A1?	Neu5Aca2-6Galb1-4GlcNAcb1-2Mana1-3Manb1-4GlcNAcb1-4GlcNAc-Sp12	3.49928		5.72603	9.3472	7.82743			6.64386		6.64386	6.64386	6.64386					0	0
HPA	348	A1?	Neu5Aca2-6Galb1-4GlcNAcb1-2Mana1-6Manb1-4GlcNAcb1-4GlcNAc-Sp12	-0.959475		5.19373	6.52953	4.70645			6.64386		6.64386	6.64386	6.64386					0	0
HPA	347	A1?	Mana1-6(Neu5Aca2-6Galb1-4GlcNAcb1-2Mana1-3)Manb1-4GlcNAcb1-4GlcNAc-Sp12	-1.1323		15.4192	9.84623	1.289			6.64386		6.64386	6.64386	6.64386					0	0
HPA	309	A1B	Neu5Aca2-6Galb1-4GlcNAcb1-2Mana1-6(GlcNAcb1-2Mana1-3)Manb1-4GlcNAcb1-4GlcNAcb-Sp12	0.97145		10.9114	5.78108	8.5028			6.64386		6.64386	6.64386	6.64386					0	0
HPA	302	A1-sp12	Neu5Aca2-6Galb1-4GlcNAcb1-2Mana1-6(Galb1-4GlcNAcb1-2Mana1-3)Manb1-4GlcNAcb1-4GlcNAcb-Sp12	-0.212675		10.0572	28.8335	7.58715			6.64386		6.64386	6.64386	6.64386					0	0
HPA	320	A1-sp12	Galb1-4GlcNAcb1-2Mana1-6(Neu5Aca2-6Galb1-4GlcNAcb1-2Mana1-3)Manb1-4GlcNAcb1-4GlcNAcb-Sp12	-1.73628		14.5191	6.7473	3.0782			6.64386		6.64386	6.64386	6.64386					0	0
HPA	397	A2	Neu5Aca2-3Galb1-3GlcNAcb1-2Mana1-6(Neu5Aca2-3Galb1-3GlcNAcb1-2Mana1-3)Manb1-4GlcNAcb1-4GlcNAc-Sp19	8.96082		14.3733	21.1268	23.3678			6.64386		6.64386	6.64386	6.64386					0	0
HPA	326	A2-(a2-3)-sp12	Neu5Aca2-3Galb1-4GlcNAcb1-2Mana1-6(Neu5Aca2-3Galb1-4GlcNAcb1-2Mana1-3)Manb1-4GlcNAcb1-4GlcNAcb-Sp12	-3.72037		-0.5994	7.13493	6.29128			6.64386		6.64386	6.64386	6.64386					0	0
HPA	327	A2-(a2-6)-sp12	Neu5Aca2-3Galb1-4GlcNAcb1-2Mana1-6(Neu5Aca2-6Galb1-4GlcNAcb1-2Mana1-3)Manb1-4GlcNAcb1-4GlcNAcb-Sp12	-0.549025		9.25943	8.8818	17.7942			6.64386		6.64386	6.64386	6.64386					0	0
HPA	55	A2-(a2-6)-sp12	Neu5Aca2-6Galb1-4GlcNAcb1-2Mana1-6(Neu5Aca2-6Galb1-4GlcNAcb1-2Mana1-3)Manb1-4GlcNAcb1-4GlcNAcb-Sp12	-1.74652		1.4676	3.10233	7.6881			6.64386		6.64386	6.64386	6.64386					0	0
HPA	56	A2-(a2-6)-sp13	Neu5Aca2-6Galb1-4GlcNAcb1-2Mana1-6(Neu5Aca2-6Galb1-4GlcNAcb1-2Mana1-3)Manb1-4GlcNAcb1-4GlcNAcb-Sp13	3.18		10.1974	9.46835	11.3149			6.64386		6.64386	6.64386	6.64386					0	0
HPA	57	A2-(a2-6)-sp21	Neu5Aca2-6Galb1-4GlcNAcb1-2Mana1-6(Neu5Aca2-6Galb1-4GlcNAcb1-2Man-a1-3)Manb1-4GlcNAcb1-4GlcNAcb-Sp21	1.8685		7.81858	19.7003	6.7868			6.64386		6.64386	6.64386	6.64386					0	0
HPA	58	A2-(a2-6)-sp24	Neu5Aca2-6Galb1-4GlcNAcb1-2Mana1-6(Neu5Aca2-6Galb1-4GlcNAcb1-2Mana1-3)Manb1-4GlcNAcb1-4GlcNAcb-Sp24	2.06913		10.3874	29.5208	10.7042			6.64386		6.64386	6.64386	6.64386					0	0
HPA	464	A2B	Neu5Aca2-6Galb1-4GlcNAcb1-2Mana1-6(GlcNAcb1-4)(Neu5Aca2-6Galb1-4GlcNAcb1-2Mana1-3)Manb1-4GlcNAcb1-4GlcNAcb-Sp21	-0.936675		3.71162	-0.62565	2.17133			6.64386		6.64386	6.64386	6.64386					0	0
HPA	460	A2B	Neu5Aca2-3Galb1-4GlcNAcb1-2Mana1-6(GlcNAcb1-4)(Neu5Aca2-3Galb1-4GlcNAcb1-2Mana1-3)Manb1-4GlcNAcb1-4GlcNAcb-Sp21	-7.6658		14.7565	2.70458	-2.82083			6.64386		6.64386	6.64386	6.64386					0	0
HPA	483	A2F	Neu5Aca2-6Galb1-4GlcNAcb1-2Mana1-6(Neu5Aca2-6Galb1-4GlcNAcb1-2Mana1-3)Manb1-4GlcNAcb1-4(Fuca1-6)GlcNAcb-Sp24	-0.801925		8.5493	22.2405	13.4295			6.64386		6.64386	6.64386	6.64386					0	0
HPA	484	A2F	Neu5Aca2-3Galb1-4GlcNAcb1-2Mana1-6(Neu5Aca2-3Galb1-4GlcNAcb1-2Mana1-3)Manb1-4GlcNAcb1-4(Fuca1-6)GlcNAcb-Sp24	-3.88155		8.34323	3.55105	3.57542			6.64386		6.64386	6.64386	6.64386					0	0
HPA	319	A2-sp12	Neu5Aca2-6Galb1-4GlcNAcb1-2Mana1-6(Neu5Aca2-3Galb1-4GlcNAcb1-2Mana1-3)Manb1-4GlcNAcb1-4GlcNAcb-Sp12	-1.48628		10.5744	9.09595	6.1842			6.64386		6.64386	6.64386	6.64386					0	0
HPA	466	A3B	Neu5Aca2-6Galb1-4GlcNAcb1-6(Neu5Aca2-6Galb1-4GlcNAcb1-2)Mana1-6(GlcNAcb1-4)(Neu5Aca2-6Galb1-4GlcNAcb1-2Mana1-3)Manb1-4GlcNAcb1-4GlcNAcb-Sp21	-1.57808		8.73767	8.95135	6.4843			6.64386		6.64386	6.64386	6.64386					0	0
HPA	462	A3B	Neu5Aca2-3Galb1-4GlcNAcb1-6(Neu5Aca2-3Galb1-4GlcNAcb1-2)Mana1-6(GlcNAcb1-4)(Neu5Aca2-3Galb1-4GlcNAcb1-2Mana1-3)Manb1-4GlcNAcb1-4GlcNAcb-Sp21	-4.0499		8.56548	2.01068	-0.18965			6.64386		6.64386	6.64386	6.64386					0	0
HPA	465	A3B	Neu5Aca2-6Galb1-4GlcNAcb1-4Mana1-6(GlcNAcb1-4)(Neu5Aca2-6Galb1-4GlcNAcb1-4(Neu5Aca2-6Galb1-4GlcNAcb1-2)Mana1-3)Manb1-4GlcNAcb1-4GlcNAcb-Sp21	-9.26597		11.7448	1.59598	-2.01168			6.64386		6.64386	6.64386	6.64386					0	0
HPA	461	A3B	Neu5Aca2-3Galb1-4GlcNAcb1-4Mana1-6(GlcNAcb1-4)(Neu5Aca2-3Galb1-4GlcNAcb1-4(Neu5Aca2-3Galb1-4GlcNAcb1-2)Mana1-3)Manb1-4GlcNAcb1-4GlcNAcb-Sp21	-5.83277		-1.20343	5.08233	-4.0165			6.64386		6.64386	6.64386	6.64386					0	0
HPA	463	A4B	Neu5Aca2-3Galb1-4GlcNAcb1-6(Neu5Aca2-3Galb1-4GlcNAcb1-2)Mana1-6(GlcNAcb1-4)(Neu5Aca2-3Galb1-4GlcNAcb1-4(Neu5Aca2-3Galb1-4GlcNAcb1-2)Mana1-3)Manb1-4GlcNAcb1-4GlcNAcb-Sp21	-5.37692		5.82932	1.37625	9.37272			6.64386		6.64386	6.64386	6.64386					0	0
HPA	467	A4B	Neu5Aca2-6Galb1-4GlcNAcb1-6(Neu5Aca2-6Galb1-4GlcNAcb1-2)Mana1-6(GlcNAcb1-4)(Neu5Aca2-6Galb1-4GlcNAcb1-4(Neu5Aca2-6Galb1-4GlcNAcb1-2)Mana1-3)Manb1-4GlcNAcb1-4GlcNAcb-Sp21	-6.56545		1.37855	-1.88915	0.5405			6.64386		6.64386	6.64386	6.64386					0	0
HPA	93	Adi	GalNAca1-3Galb-Sp8	28506		27335.6	15046.9	2592.27			14.799		14.7385	13.8772	11.34					0.861314	2.53718
HPA	116	alpha Gal	Gala1-3Galb1-4GlcNAcb-Sp8	-1.4195		14.1859	0.1007	10.2749			6.64386		6.64386	6.64386	6.64386					0	0
HPA	522	alpha Gal like	Gala1-3Galb1-4GlcNAcb1-2Mana-Sp0	-4.9547		15.1431	2.904	13.6519			6.64386		6.64386	6.64386	6.64386					0	0
HPA	406	alpha Gal like	Gala1-3Galb1-4GlcNacb1-3GalNaca-Sp14	-2.5337		4.758	7.24735	12.5611			6.64386		6.64386	6.64386	6.64386					0	0
HPA	490	alpha Gal like	Gala1-3Galb1-3GlcNAcb1-6GalNAca-Sp14	-8.80975		1.93085	1.1109	4.70167			6.64386		6.64386	6.64386	6.64386					0	0
HPA	561	alpha Gal like	Gala1-3Galb1-4GlcNAcb1-2Mana1-6(Gala1-3Galb1-4GlcNAcb1-2Mana1-3)Manb1-4GlcNAcb1-4GlcNAc-Sp24	8.47995		19.1197	26.4156	2.7685			6.64386		6.64386	6.64386	6.64386					0	0
HPA	496	alpha Gal like	Gala1-3Galb1-4GlcNAcb1-6GalNAca-Sp14	-11.5758		5.77285	0.1597	0.5361			6.64386		6.64386	6.64386	6.64386					0	0
HPA	119	Bdi	Gala1-3Galb-Sp8	0.523275		7.2464	14.2754	5.91498			6.64386		6.64386	6.64386	6.64386					0	0
HPA	91	BG-A	GalNAca1-3(Fuca1-2)Galb-Sp18	37398.4		27607.1	11418.8	2147.41			15.1907		14.7528	13.4791	11.0684					1.27363	2.41074
HPA	90	BG-A	GalNAca1-3(Fuca1-2)Galb-Sp8	24603.1		25021.6	9933.93	1370.95			14.5866		14.6109	13.2781	10.421					1.33274	2.85719
HPA	336	BG-A--	GalNAca1-3(Fuca1-2)Galb1-4GlcNAcb1-3Galb1-4GlcNAcb-Sp0	25273.7		34579.1	20840.1	4156.59			14.6253		15.0776	14.3471	12.0212					0.730542	2.32589
HPA	337	BG-A--	GalNAca1-3(Fuca1-2)Galb1-4GlcNAcb1-3Galb1-4GlcNAcb1-3Galb1-4GlcNAcb-Sp0	23463.6		26230.3	19018.5	3361.42			14.5181		14.6789	14.2151	11.7149					0.463831	2.50026
HPA	83	BG-A1	GalNAca1-3(Fuca1-2)Galb1-3GlcNAcb-Sp0	21361.4		23292.5	15277.3	2985.43			14.3827		14.5076	13.8991	11.5437					0.608478	2.35537
HPA	425	BG-A1	GalNAca1-3(Fuca1-2)Galb1-3GlcNAcb1-3GalNAc-Sp14	8408.83		8011.59	5906.59	1839.83			13.0377		12.9679	12.5281	10.8454					0.439764	1.68275
HPA	374	BG-A1--	GalNAca1-3(Fuca1-2)Galb1-3GlcNAcb1-2Mana1-6(GalNAca1-3(Fuca1-2)Galb1-3GlcNAcb1-2Mana1-3)Manb1-4GlcNAcb1-4GlcNAcb-Sp20	16137.7		20802.4	13662.8	2508.04			13.9781		14.3445	13.738	11.2923					0.606498	2.44561
HPA	458	BG-A1--	GalNAca1-3(Fuca1-2)Galb1-3GlcNAcb1-2Mana1-6(GalNAca1-3(Fuca1-2)Galb1-3GlcNAcb1-2Mana1-3)Manb1-4GlcNAcb1-4(Fuca1-6)GlcNAcb-Sp22	11140.2		12498	8925.34	1074.88			13.4435		13.6094	13.1237	10.07					0.485717	3.05374
HPA	507	BG-A1 like	GalNAca1-3(Fuca1-2)Galb1-3GlcNAcb1-6GalNAca-Sp14	16247.6		16024.8	10746.5	2073.21			13.9879		13.968	13.3916	11.0177					0.576436	2.37393
HPA	87	BG-A2	GalNAca1-3(Fuca1-2)Galb1-4GlcNAcb-Sp8	27937.4		22861.2	11763.9	2338.49			14.7699		14.4806	13.5221	11.1914					0.958535	2.33072
HPA	86	BG-A2	GalNAca1-3(Fuca1-2)Galb1-4GlcNAcb-Sp0	20497		22457.4	8025.68	1038.03			14.3231		14.4549	12.9704	10.0196					1.4845	2.95078
HPA	452	BG-A2--	GalNAca1-3(Fuca1-2)Galb1-4GlcNAcb1-6(GalNAca1-3(Fuca1-2)Galb1-4GlcNAcb1-3)GalNAc-Sp14	16662.6		19880.9	18121.2	3904.23			14.0243		14.2791	14.1454	11.9308					0.13371	2.21457
HPA	371	BG-A2--	GalNAca1-3(Fuca1-2)Galb1-4GlcNAcb1-2Mana1-6(GalNAca1-3(Fuca1-2)Galb1-4GlcNAcb1-2Mana1-3)Manb1-4GlcNAcb1-4GlcNAcb-Sp20	26480.7		31081.9	21969.1	3192.21			14.6927		14.9238	14.4232	11.6403					0.500602	2.78285
HPA	415	BG-A2--	GalNAca1-3(Fuca1-2)Galb1-4GlcNAcb1-3GalNAca-Sp14	9949.24		9324.49	6651.57	2866.78			13.2804		13.1868	12.6995	11.4852					0.48733	1.21427
HPA	455	BG-A2--	GalNAca1-3(Fuca1-2)Galb1-4GlcNAcb1-2Mana1-6(GalNAca1-3(Fuca1-2)Galb1-4GlcNAcb1-2Mana1-3)Manb1-4GlcNAcb1-4(Fuca1-6)GlcNAcb-Sp22	11600.6		13333.6	10095.6	2332.22			13.5019		13.7028	13.3014	11.1875					0.401334	2.11396
HPA	419	BG-A2--	GalNAca1-3(Fuca1-2)Galb1-4(Fuca1-3)GlcNAcb1-3GalNAc-Sp14	467.073		628.896	172.094	63.6349			8.8675		9.29668	7.42705	6.64386					1.86962	0.783198
HPA	524	BG-A2 like	GalNAca1-3(Fuca1-2)Galb1-4 GlcNAcb1-2Mana-Sp0	19863.7		26618.7	19362.3	3800.96			14.2778		14.7002	14.241	11.8921					0.459194	2.34881
HPA	520	BG-A2 like	GalNAca1-3(Fuca1-2)Galb1-4GlcNAcb1-6GalNAc-Sp14	18359.4		20400.1	13606.9	2279.07			14.1642		14.3163	13.7321	11.1542					0.584238	2.57782
HPA	394	BG-A3	GalNAca1-3(Fuca1-2)Galb1-3GalNAca1-3(Fuca1-2)Galb1-4GlcNAcb-Sp0	19756.5		25725.5	19088.4	2544.08			14.27		14.6509	14.2204	11.3129					0.430498	2.90748
HPA	88	BG-A6	GalNAca1-3(Fuca1-2)Galb1-4Glcb-Sp0	13468.6		21943.7	12715.3	1821.63			13.7173		14.4215	13.6343	10.831					0.787239	2.80327
HPA	108	BG-B tri	Gala1-3(Fuca1-2)Galb-Sp8	-1.06135		-1.0587	-0.098525	6.54007			6.64386		6.64386	6.64386	6.64386					0	0
HPA	109	BG-B tri	Gala1-3(Fuca1-2)Galb-Sp18	-5.62395		6.3575	15.8071	5.87233			6.64386		6.64386	6.64386	6.64386					0	0
HPA	103	BG-B1	Gala1-3(Fuca1-2)Galb1-3GlcNAcb-Sp8	7.50985		22.0853	26.7501	20.7188			6.64386		6.64386	6.64386	6.64386					0	0
HPA	424	BG-B1	Gala1-3(Fuca1-2)Galb1-3GlcNAcb1-3GalNAc-Sp14	-6.339		3.14015	4.07368	8.38168			6.64386		6.64386	6.64386	6.64386					0	0
HPA	102	BG-B1	Gala1-3(Fuca1-2)Galb1-3GlcNAcb-Sp0	2.81498		5.19473	8.20982	7.88365			6.64386		6.64386	6.64386	6.64386					0	0
HPA	456	BG-B1--	Gala1-3(Fuca1-2)Galb1-3GlcNAcb1-2Mana1-6(Gala1-3(Fuca1-2)Galb1-3GlcNAcb1-2Mana1-3)Manb1-4GlcNAcb1-4(Fuca1-6)GlcNAcb-Sp22	-3.48105		11.6883	11.5287	14.6939			6.64386		6.64386	6.64386	6.64386					0	0
HPA	375	BG-B1--	Gala1-3(Fuca1-2)Galb1-3GlcNAcb1-2Mana1-6(Gala1-3(Fuca1-2)Galb1-3GlcNAcb1-2Mana1-3)Manb1-4GlcNAcb1-4GlcNAcb-Sp20	-3.56278		13.8158	4.32853	4.46343			6.64386		6.64386	6.64386	6.64386					0	0
HPA	526	BG-B1 like	Gala1-3(Fuca1-2)Galb1-3GlcNAcb1-6GalNAc-Sp14	-6.39073		-1.27607	1.18103	12.4505			6.64386		6.64386	6.64386	6.64386					0	0
HPA	538	BG-B1 like	Gala1-3(Fuca1-2)Galb1-3GalNAcb1-3Gala1-4Galb1-4Glc-Sp21	-4.21305		4.07737	5.58877	-2.10168			6.64386		6.64386	6.64386	6.64386					0	0
HPA	106	BG-B2	Gala1-3(Fuca1-2)Galb1-4GlcNAc-Sp0	0.988175		2.19647	10.9555	-1.04722			6.64386		6.64386	6.64386	6.64386					0	0
HPA	451	BG-B2--	Gala1-3Fuca1-2Galb1-4GlcNAcb1-6(Gala1-3Fuca1-2Galb1-4GlcNAcb1-3)GalNAc-Sp14	-5.99963		8.26227	4.66775	8.06568			6.64386		6.64386	6.64386	6.64386					0	0
HPA	414	BG-B2--	Gala1-3(Fuca1-2)Galb1-4GlcNAcb1-3GalNAca-Sp14	0.444175		7.19977	3.1012	7.65185			6.64386		6.64386	6.64386	6.64386					0	0
HPA	372	BG-B2--	Gala1-3(Fuca1-2)Galb1-4GlcNAcb1-2Mana1-6(Gala1-3(Fuca1-2)Galb1-4GlcNAcb1-2Mana1-3)Manb1-4GlcNAcb1-4GlcNAcb-Sp20	-1.12495		14.3199	19.734	4.43207			6.64386		6.64386	6.64386	6.64386					0	0
HPA	418	BG-B2--	Gala1-3(Fuca1-2)Galb1-4(Fuca1-3)GlcNAcb1-3GalNAc-Sp14	1.4499		4.30167	10.9878	3.98658			6.64386		6.64386	6.64386	6.64386					0	0
HPA	428	BG-B2 like	Gala1-3(Fuca1-2)Galb1-4GlcNAcb1-2Mana1-6(Gala1-3(Fuca1-2)Galb1-4GlcNAcb1-2Mana1-3)Manb1-4GlcNAcb1-4(Fuca1-6)GlcNAcb-Sp22	-0.301875		1.5449	14.2252	4.68197			6.64386		6.64386	6.64386	6.64386					0	0
HPA	523	BG-B2 like	Gala1-3(Fuca1-2)Galb1-4GlcNAcb1-2Mana-Sp0	-2.7492		6.0678	0.256575	4.42682			6.64386		6.64386	6.64386	6.64386					0	0
HPA	499	BG-B2 like	Gala1-3(Fuca1-2)Galb1-4GlcNAcb1-6GalNAca-Sp14	-6.9068		11.2573	0.7563	1.88948			6.64386		6.64386	6.64386	6.64386					0	0
HPA	468	BG-B3	Gala1-3(Fuca1-2)Galb1-3GalNAca-Sp8	-2.50395		-0.886475	-1.3463	-1.59363			6.64386		6.64386	6.64386	6.64386					0	0
HPA	469	BG-B4	Gala1-3(Fuca1-2)Galb1-3GalNAcb-Sp8	1.92325		6.02365	3.91705	8.27078			6.64386		6.64386	6.64386	6.64386					0	0
HPA	410	BG-B6	Gala1-3(Fuca1-2)Galb1-4(Fuca1-3)Glcb-Sp21	-2.75887		4.04865	10.8783	10.0568			6.64386		6.64386	6.64386	6.64386					0	0
HPA	107	BG-B6	Gala1-3(Fuca1-2)Galb1-4Glcb-Sp0	-3.72737		6.54757	6.64233	3.7388			6.64386		6.64386	6.64386	6.64386					0	0
HPA	79	BG-H	Fuca1-2Galb-Sp8	-2.0929		13.7212	7.42265	8.95942			6.64386		6.64386	6.64386	6.64386					0	0
HPA	502	BG-H like	Fuca1-2(6S)Galb1-3(6S)GlcNAcb-Sp0	61.1291		43.457	36.5841	35.4145			6.64386		6.64386	6.64386	6.64386					0	0
HPA	501	BG-H like	Fuca1-2Galb1-3(6S)GlcNAcb-Sp0	28.178		45.3817	11.0761	11.5815			6.64386		6.64386	6.64386	6.64386					0	0
HPA	423	BG-H1	Fuca1-2Galb1-3GlcNAcb1-3GalNAc-Sp14	-8.8256		4.59443	1.38168	19.0783			6.64386		6.64386	6.64386	6.64386					0	0
HPA	66	BG-H1	Fuca1-2Galb1-3GlcNAcb1-3Galb1-4Glcb-Sp8	-3.1527		1.94318	5.57265	12.5092			6.64386		6.64386	6.64386	6.64386					0	0
HPA	69	BG-H1	Fuca1-2Galb1-3GlcNAcb-Sp8	1.26593		7.4916	0.580225	11.1965			6.64386		6.64386	6.64386	6.64386					0	0
HPA	67	BG-H1	Fuca1-2Galb1-3GlcNAcb1-3Galb1-4Glcb-Sp10	1.11817		9.58855	6.58612	5.5559			6.64386		6.64386	6.64386	6.64386					0	0
HPA	68	BG-H1	Fuca1-2Galb1-3GlcNAcb-Sp0	-1.76153		5.56487	5.4337	3.7419			6.64386		6.64386	6.64386	6.64386					0	0
HPA	223	BG-H1 (di-sulfated)	Fuca1-2(6S)Galb1-4(6S)Glcb-Sp0	0.251175		7.45278	14.2565	8.96103			6.64386		6.64386	6.64386	6.64386					0	0
HPA	221	BG-H1 (sulfated)	Fuca1-2(6S)Galb1-4GlcNAcb-Sp0	-3.61625		7.09717	11.8312	12.1892			6.64386		6.64386	6.64386	6.64386					0	0
HPA	222	BG-H1 (sulfated)	Fuca1-2Galb1-4(6S)GlcNAcb-Sp8	1.39205		17.057	13.4613	11.7414			6.64386		6.64386	6.64386	6.64386					0	0
HPA	506	BG-H1 like	Fuca1-2Galb1-3GlcNAcb1-6(Fuca1-2Galb1-3GlcNAcb1-3)GalNAca-Sp14	-3.71043		10.1437	12.1685	5.7682			6.64386		6.64386	6.64386	6.64386					0	0
HPA	369	BG-H1/LeX	Galb1-4(Fuca1-3)GlcNAcb1-6(Fuca1-2Galb1-4GlcNAcb1-3)Galb1-4Glc-Sp21	1.55648		9.01062	15.3087	1.83937			6.64386		6.64386	6.64386	6.64386					0	0
HPA	361	BG-H1-Man3	Fuca1-2Galb1-3GlcNAcb1-2Mana1-6(Fuca1-2Galb1-3GlcNAcb1-2Mana1-3)Manb1-4GlcNAcb1-4GlcNAcb-Sp20	17.3453		27.0315	27.6197	11.158			6.64386		6.64386	6.64386	6.64386					0	0
HPA	427	BG-H1-Man3F	Fuca1-2Galb1-3GlcNAcb1-2Mana1-6(Fuca1-2Galb1-3GlcNAcb1-2Mana1-3)Manb1-4GlcNAcb1-4(Fuca1-6)GlcNAcb-Sp22	10.7501		22.3564	14.9547	2.21725			6.64386		6.64386	6.64386	6.64386					0	0
HPA	401	BG-H2	Fuca1-2Galb1-4GlcNacb1-3GalNaca-Sp14	1.87272		13.8333	5.79527	8.21727			6.64386		6.64386	6.64386	6.64386					0	0
HPA	76	BG-H2	Fuca1-2Galb1-4GlcNAcb-Sp0	-0.3576		9.81695	0.4862	3.14135			6.64386		6.64386	6.64386	6.64386					0	0
HPA	77	BG-H2	Fuca1-2Galb1-4GlcNAcb-Sp8	-1.90678		5.93323	16.9095	1.8849			6.64386		6.64386	6.64386	6.64386					0	0
HPA	362	BG-H2--	Fuca1-2Galb1-4GlcNAcb1-2Mana1-6(Fuca1-2Galb1-4GlcNAcb1-2Mana1-3)Manb1-4GlcNAcb1-4GlcNAcb-Sp20	0.600275		22.7987	7.95772	21.8779			6.64386		6.64386	6.64386	6.64386					0	0
HPA	75	BG-H2--	Fuca1-2Galb1-4GlcNAcb1-3Galb1-4GlcNAcb1-3Galb1-4GlcNAcb-Sp0	-0.17175		25.3354	14.4904	12.8656			6.64386		6.64386	6.64386	6.64386					0	0
HPA	74	BG-H2--	Fuca1-2Galb1-4GlcNAcb1-3Galb1-4GlcNAcb-Sp0	-0.8615		2.8621	7.83983	5.2407			6.64386		6.64386	6.64386	6.64386					0	0
HPA	500	BG-H2--	Fuca1-2Galb1-4GlcNAcb1-2Mana-Sp0	-10.7975		3.93615	3.4548	3.0525			6.64386		6.64386	6.64386	6.64386					0	0
HPA	446	BG-H2 like	Fuca1-2Galb1-4 GlcNAcb1-2Mana1-6(Fuca1-2Galb1-4GlcNAcb1-2(Fuca1-2Galb1-4GlcNAcb1-4)Mana1-3)Manb1-4GlcNAcb1-4GlcNAcb-N	4.58785		34.7748	23.5461	29.1002			6.64386		6.64386	6.64386	6.64386					0	0
HPA	495	BG-H2 like	Fuca1-2Galb1-4GlcNAcb1-6GalNAca-Sp14	16.3035		20.7357	28.9035	15.3566			6.64386		6.64386	6.64386	6.64386					0	0
HPA	450	BG-H2 like	Fuca1-2Galb1-4GlcNAcb1-6(Fuca1-2Galb1-4GlcNAcb1-3)GalNAc-Sp14	3.33038		27.3771	14.6383	13.8631			6.64386		6.64386	6.64386	6.64386					0	0
HPA	545	BG-H2 like	Fuca1-2Galb1-4GlcNAcb1-3Galb1-4GlcNAcb1-2Mana1-6(Fuca1-2Galb1-4GlcNAcb1-3Galb1-4GlcNAcb1-2Mana1-3)Manb1-4GlcNAcb1-4GlcNAcb-Sp24	23.6484		23.6972	15.3715	9.70317			6.64386		6.64386	6.64386	6.64386					0	0
HPA	421	BG-H2 like	Fuca1-2Galb1-4GlcNAcb1-2Mana1-6(Fuca1-2Galb1-4GlcNAcb1-2Mana1-3)Manb1-4GlcNAcb1-4(Fuca1-6)GlcNAcb-Sp22	13.6775		18.1701	9.53265	6.69388			6.64386		6.64386	6.64386	6.64386					0	0
HPA	62	BG-H3	Fuca1-2Galb1-3GalNAca-Sp8	-3.95493		17.5348	3.21695	8.72273			6.64386		6.64386	6.64386	6.64386					0	0
HPA	63	BG-H3	Fuca1-2Galb1-3GalNAca-Sp14	-0.5788		8.28905	2.38223	5.02025			6.64386		6.64386	6.64386	6.64386					0	0
HPA	391	BG-H3--	Fuca1-2Galb1-3GalNAca1-3(Fuca1-2)Galb1-4GlcNAcb-Sp0	2574.91		2460.54	703.876	172.928			11.3303		11.2648	9.45918	7.43403					1.80558	2.02515
HPA	390	BG-H3--	Fuca1-2Galb1-3GalNAca1-3(Fuca1-2)Galb1-4Glcb-Sp0	11.92		10.6272	14.1623	3.92458			6.64386		6.64386	6.64386	6.64386					0	0
HPA	59	BG-H4	Fuca1-2Galb1-3GalNAcb1-3Gala-Sp9	2.50948		12.996	7.92495	15.0305			6.64386		6.64386	6.64386	6.64386					0	0
HPA	249	BG-H6 (sulfated)	Fuca1-2(6S)Galb1-4Glcb-Sp0	-2.05812		4.25865	-0.22865	12.8193			6.64386		6.64386	6.64386	6.64386					0	0
HPA	263	BG-H6 (sulfated)	Fuca1-2Galb1-4(6S)Glcb-Sp0	2.00408		11.7586	5.57003	11.2856			6.64386		6.64386	6.64386	6.64386					0	0
HPA	321	biantennary	GlcNAcb1-2Mana1-6(Neu5Aca2-6Galb1-4GlcNAcb1-2Mana1-3)Manb1-4GlcNAcb1-4GlcNAcb-Sp12	0.934075		3.70215	5.06177	4.1584			6.64386		6.64386	6.64386	6.64386					0	0
HPA	199	cellobiose	Glcb1-4Glcb-Sp8	1.87675		22.1934	5.29412	0.274725			6.64386		6.64386	6.64386	6.64386					0	0
HPA	312	chitobiose	GlcNAcb1-4GlcNAcb-Sp12	-0.186175		7.2046	19.0152	16.3338			6.64386		6.64386	6.64386	6.64386					0	0
HPA	311	chitobiose	GlcNAcb1-4GlcNAcb-Sp10	0.379575		8.68445	3.1053	5.34675			6.64386		6.64386	6.64386	6.64386					0	0
HPA	190	chitohexaose	GlcNAcb1-4GlcNAcb1-4GlcNAcb1-4GlcNAcb1-4GlcNAcb1-4GlcNAcb1-Sp8	4.53555		6.83075	1.58732	4.22562			6.64386		6.64386	6.64386	6.64386					0	0
HPA	191	chitopentaose	GlcNAcb1-4GlcNAcb1-4GlcNAcb1-4GlcNAcb1-4GlcNAcb1-Sp8	-0.9803		8.66853	17.203	5.8639			6.64386		6.64386	6.64386	6.64386					0	0
HPA	192	chitotriose	GlcNAcb1-4GlcNAcb1-4GlcNAcb-Sp8	2.85905		8.71858	12.6357	6.07583			6.64386		6.64386	6.64386	6.64386					0	0
HPA	135	core 2	GlcNAcb1-6(Galb1-3)GalNAca-Sp14	-4.14958		4.60842	0.4188	4.18777			6.64386		6.64386	6.64386	6.64386					0	0
HPA	134	core 2	GlcNAcb1-6(Galb1-3)GalNAca-Sp8	8.5755		20.7052	6.31147	4.11402			6.64386		6.64386	6.64386	6.64386					0	0
HPA	180	core 3	GlcNAcb1-3GalNAca-Sp8	2.76115		5.52488	10.2923	12.345			6.64386		6.64386	6.64386	6.64386					0	0
HPA	181	core 3	GlcNAcb1-3GalNAca-Sp14	1.06167		3.6921	3.81645	10.4843			6.64386		6.64386	6.64386	6.64386					0	0
HPA	177	core 4	GlcNAcb1-6(GlcNAcb1-3)GalNAca-Sp8	-5.75103		20.6709	13.9529	3.17472			6.64386		6.64386	6.64386	6.64386					0	0
HPA	193	core 6	GlcNAcb1-6GalNAca-Sp8	-2.50182		10.3316	0.4947	14.7852			6.64386		6.64386	6.64386	6.64386					0	0
HPA	194	core 6	GlcNAcb1-6GalNAca-Sp14	-0.826925		8.3524	7.4851	10.7984			6.64386		6.64386	6.64386	6.64386					0	0
HPA	232	CT/Sda	GalNAcb1-4(Neu5Aca2-3)Galb1-4GlcNAcb-Sp0	24.605		4.09598	13.5624	6.52645			6.64386		6.64386	6.64386	6.64386					0	0
HPA	233	CT/Sda	GalNAcb1-4(Neu5Aca2-3)Galb1-4GlcNAcb-Sp8	17.4023		8.1583	10.6646	1.312			6.64386		6.64386	6.64386	6.64386					0	0
HPA	385	DFLNHc, LacNAc/LeB	Galb1-4GlcNAcb1-6(Fuca1-4(Fuca1-2Galb1-3)GlcNAcb1-3)Galb1-4Glc-Sp21	4.1419		14.9543	6.3389	0.897825			6.64386		6.64386	6.64386	6.64386					0	0
HPA	290	Di-LeC, pLNH tetra	Galb1-3GlcNAcb1-3Galb1-3GlcNAcb-Sp0	-2.51723		11.3155	4.72865	17.9893			6.64386		6.64386	6.64386	6.64386					0	0
HPA	236	diSialyl-Tn	Neu5Aca2-6(Neu5Aca2-3)GalNAca-Sp8	-4.49818		12.3501	13.3185	10.2407			6.64386		6.64386	6.64386	6.64386					0	0
HPA	132	F1alpha	Galb1-4GlcNAcb1-6GalNAca-Sp8	3.80993		5.6507	9.70937	18.2317			6.64386		6.64386	6.64386	6.64386					0	0
HPA	24	FL(3'6diSu-)	(3S)Galb1-4(Fuca1-3)(6S)Glc-Sp0	14.066		28.9133	27.0638	32.7426			6.64386		6.64386	6.64386	6.64386					0	0
HPA	416	Forssman	GalNAca1-3GalNAcb1-3Gala1-4Galb1-4Glcb-Sp0	16519.2		25473.8	17065.9	1822.88			14.0119		14.6367	14.0588	10.832					0.577895	3.22683
HPA	92	forssman di	GalNAca1-3GalNAcb-Sp8	39634		25750.4	9947.93	1109.41			15.2745		14.6523	13.2802	10.1156					1.37213	3.16461
HPA	403	Forssman-like	GalNaca1-3GalNacb1-3Gala1-4Galb1-4GlcNacb-Sp0	20438.4		23340.5	18307.3	3909.83			14.319		14.5105	14.1601	11.9329					0.35042	2.22724
HPA	7	Fuc-a	Fuca-Sp9	-1.37715		11.2922	5.05762	5.09147			6.64386		6.64386	6.64386	6.64386					0	0
HPA	6	Fuc-a	Fuca-Sp8	1.10262		10.4456	4.98155	2.56923			6.64386		6.64386	6.64386	6.64386					0	0
HPA	65	Fuc-GM1a	Fuca1-2Galb1-3GalNAcb1-4(Neu5Aca2-3)Galb1-4Glcb-Sp9	-2.15103		15.0695	15.0461	11.0902			6.64386		6.64386	6.64386	6.64386					0	0
HPA	64	Fuc-GM1a	Fuca1-2Galb1-3GalNAcb1-4(Neu5Aca2-3)Galb1-4Glcb-Sp0	-3.17782		4.76607	7.9689	7.56678			6.64386		6.64386	6.64386	6.64386					0	0
HPA	146	GA1	Galb1-3GalNAcb1-4Galb1-4Glcb-Sp8	5.27298		26.0013	15.9348	14.7135			6.64386		6.64386	6.64386	6.64386					0	0
HPA	143	GA1di, TFbb	Galb1-3GalNAcb-Sp8	-0.383625		51.8273	2.7655	10.878			6.64386		6.64386	6.64386	6.64386					0	0
HPA	454	GA2 (asialo-GM2)	GalNAcb1-4Galb1-4Glcb-Sp0	-2.4154		7.43675	8.75985	4.34387			6.64386		6.64386	6.64386	6.64386					0	0
HPA	1	Gal-a	Gala-Sp8	8.9999		4.8275	14.1361	2.9663			6.64386		6.64386	6.64386	6.64386					0	0
HPA	101	Gala1-2Gal	Gala1-2Galb-Sp8	2.69248		8.08202	21.5941	5.31293			6.64386		6.64386	6.64386	6.64386					0	0
HPA	114	Gala1-3LeX	Gala1-3Galb1-4(Fuca1-3)GlcNAcb-Sp8	1.80707		13.3514	11.4517	7.84142			6.64386		6.64386	6.64386	6.64386					0	0
HPA	115	Gala3-type1	Gala1-3Galb1-3GlcNAcb-Sp0	6.95485		14.3109	4.89428	4.5391			6.64386		6.64386	6.64386	6.64386					0	0
HPA	528	Gala-type 1 like	Gala1-3Galb1-3GlcNAcb1-2Mana-Sp0	-6.07663		8.36842	-6.0755	8.40818			6.64386		6.64386	6.64386	6.64386					0	0
HPA	426	Gala-type 1 like	Gala1-3Galb1-3GlcNAcb1-3GalNAc-Sp14	-1.48863		8.44267	5.36877	2.25995			6.64386		6.64386	6.64386	6.64386					0	0
HPA	12	Gal-b	Galb-Sp8	-0.637525		8.9318	19.7185	15.6625			6.64386		6.64386	6.64386	6.64386					0	0
HPA	38	Galb(3Su)	(3S)Galb-Sp8	1.028		16.8509	10.3491	12.8064			6.64386		6.64386	6.64386	6.64386					0	0
HPA	440	Galb1-4Gal	Galb1-4Galb-Sp10	1.27978		10.356	9.73235	10.2727			6.64386		6.64386	6.64386	6.64386					0	0
HPA	117	Galili-tri	Gala1-3Galb1-4Glcb-Sp0	5.7765		5.15998	10.7323	4.6586			6.64386		6.64386	6.64386	6.64386					0	0
HPA	4	GalNAc-a	GalNAca-Sp8	25857.1		19427.9	15288.4	2396.51			14.6583		14.2458	13.9001	11.2267					0.345695	2.67343
HPA	15	GalNAc-b	GalNAcb-Sp8	751.088		118.851	35.8362	17.4481			9.55284		6.89301	6.64386	6.64386					0.249157	0
HPA	97	Gb4 tetra (P1 tetra)	GalNAcb1-3Gala1-4Galb1-4GlcNAcb-Sp0	-1.9407		9.49483	7.23348	2.0658			6.64386		6.64386	6.64386	6.64386					0	0
HPA	335	Gb4-like	GalNAcb1-3Gala1-4Galb1-4GlcNAcb1-3Galb1-4Glcb-Sp0	0.873775		6.74038	9.40695	7.8688			6.64386		6.64386	6.64386	6.64386					0	0
HPA	539	Gb5 tri	Galb1-3GalNAcb1-3Gal-Sp21	-2.45135		-5.12958	12.9152	0.926075			6.64386		6.64386	6.64386	6.64386					0	0
HPA	144	Gb5/SSEA-3	Galb1-3GalNAcb1-3Gala1-4Galb1-4Glcb-Sp0	3.2412		13.3902	1.192	13.2186			6.64386		6.64386	6.64386	6.64386					0	0
HPA	235	GD1a	Neu5Aca2-3Galb1-3GalNAcb1-4(Neu5Aca2-3)Galb1-4Glcb-Sp0	-3.0022		1.15512	8.01755	16.1658			6.64386		6.64386	6.64386	6.64386					0	0
HPA	412	GD1b	Galb1-3GalNAcb1-4(Neu5Aca2-8Neu5Aca2-3)Galb1-4Glcb-Sp0	1.41573		9.24742	4.06642	16.0992			6.64386		6.64386	6.64386	6.64386					0	0
HPA	229	GD2	GalNAcb1-4(Neu5Aca2-8Neu5Aca2-3)Galb1-4Glcb-Sp0	7334.19		2883.46	240.635	8.48367			12.8404		11.4936	7.9107	6.64386					3.58288	1.26685
HPA	277	GD3	Neu5Aca2-8Neu5Aca2-3Galb1-4Glcb-Sp0	0.30905		3.39875	-1.3777	5.2685			6.64386		6.64386	6.64386	6.64386					0	0
HPA	2	Glc-a	Glca-Sp8	6.44652		13.1262	4.51692	7.80723			6.64386		6.64386	6.64386	6.64386					0	0
HPA	202	GlcA-a	GlcAa-Sp8	-4.74493		3.5544	3.13663	5.0962			6.64386		6.64386	6.64386	6.64386					0	0
HPA	13	Glc-b	Glcb-Sp8	3.214		16.9533	15.6155	9.05682			6.64386		6.64386	6.64386	6.64386					0	0
HPA	594	GlcNAc (core 3)	GlcNAcb1-3Galb1-4GlcNAcb1-3GalNAca-Sp14	-4.89405		3.24895	2.4694	1.86838			6.64386		6.64386	6.64386	6.64386					0	0
HPA	596	GlcNAc (core 4)	GlcNAcb1-3Galb1-4GlcNAcb1-6(GlcNAcb1-3Galb1-4GlcNAcb1-3)GalNAca-Sp14	-5.93285		-3.84922	4.64105	15.3636			6.64386		6.64386	6.64386	6.64386					0	0
HPA	595	GlcNAc (core 4)	GlcNAcb1-3Galb1-4GlcNAcb1-6(Galb1-3)GalNAca-Sp14	-0.484525		1.6877	2.53987	10.9766			6.64386		6.64386	6.64386	6.64386					0	0
HPA	581	GlcNAc ext 2 arms+F	GlcNAcb1-3Galb1-4GlcNAcb1-3Galb1-4GlcNAcb1-3Galb1-4GlcNAcb1-3Galb1-4GlcNAcb1-2Mana1-6(GlcNAcb1-3Galb1-4GlcNAcb1-3Galb1-4GlcNAcb1-3Galb1-4GlcNAcb1-3Galb1-4GlcNAcb1-2Mana1-3)Manb1-4GlcNAcb1-4(Fuca1-6)GlcNAcb-Sp19	68.8126		44.8567	22.834	24.3018			6.64386		6.64386	6.64386	6.64386					0	0
HPA	577	GlcNAc ext 2 arms+F	GlcNAcb1-3Galb1-4GlcNAcb1-3Galb1-4GlcNAcb1-2Mana1-6(GlcNAcb1-3Galb1-4GlcNAcb1-3Galb1-4GlcNAcb1-2Mana1-3)Manb1-4GlcNAcb1-4(Fuca1-6)GlcNAcb-Sp24	57.1437		35.4096	37.9537	19.7647			6.64386		6.64386	6.64386	6.64386					0	0
HPA	575	GlcNAc ext 2 arms+F	GlcNAcb1-3Galb1-4GlcNAcb1-2Mana1-6(GlcNAcb1-3Galb1-4GlcNAcb1-2Mana1-3)Manb1-4GlcNAcb1-4(Fuca1-6)GlcNAcb-Sp24	10.8416		31.8017	16.7256	17.701			6.64386		6.64386	6.64386	6.64386					0	0
HPA	579	GlcNAc ext 2 arms+F	GlcNAcb1-3Galb1-4GlcNAcb1-3Galb1-4GlcNAcb1-3Galb1-4GlcNAcb1-2Mana1-6(GlcNAcb1-3Galb1-4GlcNAcb1-3Galb1-4GlcNAcb1-3Galb1-4GlcNAcb1-2Mana1-3)Manb1-4GlcNAcb1-4(Fuca1-6)GlcNAcb-Sp24	60.2482		83.5783	30.8833	5.72993			6.64386		6.64386	6.64386	6.64386					0	0
HPA	541	GlcNAc ext 2 arms1	GlcNAcb1-3Galb1-4GlcNAcb1-2Mana1-6(GlcNAcb1-3Galb1-4GlcNAcb1-2Mana1-3)Manb1-4GlcNAcb1-4GlcNAcb-Sp25	-1.07878		5.35547	19.5244	15.1222			6.64386		6.64386	6.64386	6.64386					0	0
HPA	540	GlcNAc ext 2 arms1	GlcNAcb1-3Galb1-4GlcNAcb1-2Mana1-6(GlcNAcb1-3Galb1-4GlcNAcb1-2Mana1-3)Manb1-4GlcNAcb1-4GlcNAcb-Sp12	-10.3541		4.728	1.09215	8.49468			6.64386		6.64386	6.64386	6.64386					0	0
HPA	546	GlcNAc ext 2 arms2	GlcNAcb1-3Galb1-4GlcNAcb1-3Galb1-4GlcNAcb1-2Mana1-6(GlcNAcb1-3Galb1-4GlcNAcb1-3Galb1-4GlcNAcb1-2Mana1-3)Manb1-4GlcNAcb1-4GlcNAcb-Sp12	61.0696		103.293	138.089	103.536			6.64386		6.6906	7.10946	6.69399					-0.418853	0.415471
HPA	547	GlcNAc ext 2 arms2	GlcNAcb1-3Galb1-4GlcNAcb1-3Galb1-4GlcNAcb1-2Mana1-6(GlcNAcb1-3Galb1-4GlcNAcb1-3Galb1-4GlcNAcb1-2Mana1-3)Manb1-4GlcNAcb1-4GlcNAcb-Sp25	11.1593		10.6156	8.82648	11.4874			6.64386		6.64386	6.64386	6.64386					0	0
HPA	550	GlcNAc ext 2 arms3	GlcNAcb1-3Galb1-4GlcNAcb1-3Galb1-4GlcNAcb1-3Galb1-4GlcNAcb1-2Mana1-6(GlcNAcb1-3Galb1-4GlcNAcb1-3Galb1-4GlcNAcb1-3Galb1-4GlcNAcb1-2Mana1-3)Manb1-4GlcNAcb1-4GlcNAcb-Sp25	39.7221		74.375	35.845	10.1381			6.64386		6.64386	6.64386	6.64386					0	0
HPA	588	GlcNAc ext 3 arms+F	GlcNAcb1-3Galb1-4GlcNAcb1-3Galb1-4GlcNAcb1-3Galb1-4GlcNAcb1-3Galb1-4GlcNAcb1-6(GlcNAcb1-3Galb1-4GlcNAcb1-3Galb1-4GlcNAcb1-3Galb1-4GlcNAcb1-3Galb1-4GlcNAb1-2)Mana1-6(GlcNAcb1-3Galb1-4GlcNAcb1-3Galb1-4GlcNAcb1-3Galb1-4GlcNAcb1-3Galb1-4GlcNAcb1-2Mana1-3)Manb	65.85		75.0296	44.0912	18.352			6.64386		6.64386	6.64386	6.64386					0	0
HPA	586	GlcNAc ext 3 arms+F	GlcNAcb1-3Galb1-4GlcNAcb1-3Galb1-4GlcNAcb1-3Galb1-4GlcNAcb1-6(GlcNAcb1-3Galb1-4GlcNAcb1-3Galb1-4GlcNAcb1-3Galb1-4GlcNAb1-2)Mana1-6(GlcNAcb1-3Galb1-4GlcNAcb1-3Galb1-4GlcNAcb1-3Galb1-4GlcNAcb1-2Mana1-3)Manb1-4GlcNAcb1-4(Fuca1-6)GlcNAcb-Sp24	14.6611		44.0739	34.4251	17.7368			6.64386		6.64386	6.64386	6.64386					0	0
HPA	584	GlcNAc ext 3 arms+F	GlcNAcb1-3Galb1-4GlcNAcb1-3Galb1-4GlcNAcb1-6(GlcNAcb1-3Galb1-4GlcNAcb1-3Galb1-4GlcNAb1-2)Mana1-6(GlcNAcb1-3Galb1-4GlcNAcb1-3Galb1-4GlcNAcb1-2Mana1-3)Manb1-4GlcNAcb1-4(Fuca1-6)GlcNAcb-Sp24	41.2968		42.256	22.4116	16.0872			6.64386		6.64386	6.64386	6.64386					0	0
HPA	559	GlcNAc ext 3 arms1	GlcNAcb1-3Galb1-4GlcNAcb1-6(GlcNAcb1-3Galb1-4GlcNAcb1-2)Mana1-6(GlcNAcb1-3Galb1-4GlcNAcb1-2)Man a1-3)Manb1-4GlcNAcb1-4GlcNAc-Sp24	58.0831		100.548	61.1187	13.3728			6.64386		6.65175	6.64386	6.64386					0.00788941	0
HPA	565	GlcNAc ext 3 arms4	GlcNAcb1-3Galb1-4GlcNAcb1-3Galb1-4GlcNAcb1-3Galb1-4GlcNAcb1-3Galb1-4GlcNAcb1-2Mana1-6(GlcNAcb1-3Galb1-4GlcNAcb1-3Galb1-4GlcNAcb1-3Galb1-4GlcNAcb1-3Galb1-4GlcNAcb1-2Mana1-3)Manb1-4GlcNAcb1-4GlcNAcb-Sp25	47.4455		43.3527	32.5739	19.6599			6.64386		6.64386	6.64386	6.64386					0	0
HPA	345	GlcNAca1-4Galb like	GlcNAca1-4Galb1-3GalNAc-Sp14	15380.4		11065.2	7445.26	2359.36			13.9088		13.4337	12.8621	11.2042					0.571637	1.65792
HPA	341	GlcNAca1-4Galb like	GlcNAca1-4Galb1-3GlcNAcb-Sp0	13737		10641.2	4329.82	1884.19			13.7458		13.3774	12.0801	10.8797					1.29728	1.20036
HPA	340	GlcNAca1-4Galb like	GlcNAca1-4Galb1-4GlcNAcb-Sp0	12346.1		11012.2	6288.92	1410.22			13.5918		13.4268	12.6186	10.4617					0.808213	2.15689
HPA	342	GlcNAca1-4Galb like	GlcNAca1-4Galb1-4GlcNAcb1-3Galb1-4Glcb-Sp0	16070.1		13872.4	8139.95	1261.72			13.9721		13.7599	12.9908	10.3012					0.769125	2.68963
HPA	16	GlcNAc-b	GlcNAcb-Sp0	1.42193		11.1568	4.99597	8.4962			6.64386		6.64386	6.64386	6.64386					0	0
HPA	17	GlcNAc-b	GlcNAcb-Sp8	1.27287		18.1235	8.06835	8.45532			6.64386		6.64386	6.64386	6.64386					0	0
HPA	47	GlcNAcb(6Su)	(6S)GlcNAcb-Sp8	-1.35		11.5855	12.825	10.3959			6.64386		6.64386	6.64386	6.64386					0	0
HPA	18	GlcNGc-b	GlcN(Gc)b-Sp8	2.86867		13.1526	5.61015	6.98445			6.64386		6.64386	6.64386	6.64386					0	0
HPA	537	Globo A	GalNAca1-3(Fuca1-2)Galb1-3GalNAcb1-3Gala1-4Galb1-4Glc-Sp21	23988.4		26288.2	20037.1	4328.52			14.5501		14.6821	14.2904	12.0797					0.39174	2.21073
HPA	60	Globo H	Fuca1-2Galb1-3GalNAcb1-3Gala1-4Galb1-4Glcb-Sp9	-0.829225		6.56957	4.87365	15.8782			6.64386		6.64386	6.64386	6.64386					0	0
HPA	145	GM1a	Galb1-3GalNAcb1-4(Neu5Aca2-3)Galb1-4Glcb-Sp0	-0.117675		7.26103	6.72017	4.63795			6.64386		6.64386	6.64386	6.64386					0	0
HPA	234	GM2	GalNAcb1-4(Neu5Aca2-3)Galb1-4Glcb-Sp0	919.28		62.4982	7.7818	5.58925			9.84436		6.64386	6.64386	6.64386					0	0
HPA	264	GM3	Neu5Aca2-3Galb1-4Glcb-Sp0	15.1657		19.7874	17.3249	15.1045			6.64386		6.64386	6.64386	6.64386					0	0
HPA	265	GM3	Neu5Aca2-3Galb1-4Glcb-Sp8	0.1871		3.9525	10.099	11.8065			6.64386		6.64386	6.64386	6.64386					0	0
HPA	285	GM3 (Gc)	Neu5Gca2-3Galb1-4Glcb-Sp0	5.4915		15.5816	14.2351	21.469			6.64386		6.64386	6.64386	6.64386					0	0
HPA	246	GM3-di	Neu5Aca2-3Galb-Sp8	2.68212		13.8773	2.78413	5.63968			6.64386		6.64386	6.64386	6.64386					0	0
HPA	184	GNLacNAc	GlcNAcb1-3Galb1-4GlcNAcb-Sp8	0.002925		8.89212	7.75165	7.30165			6.64386		6.64386	6.64386	6.64386					0	0
HPA	183	GNLacNAc	GlcNAcb1-3Galb1-4GlcNAcb-Sp0	-2.2091		8.4064	4.2097	6.01745			6.64386		6.64386	6.64386	6.64386					0	0
HPA	453	GQ1b	Neu5Aca2-8Neu5Aca2-3Galb1-3GalNAcb1-4(Neu5Aca2-8Neu5Aca2-3)Galb1-4Glcb-Sp0	-5.60557		15.3918	-4.07943	0.3615			6.64386		6.64386	6.64386	6.64386					0	0
HPA	226	GQ2	GalNAcb1-4(Neu5Aca2-8Neu5Aca2-8Neu5Aca2-8Neu5Aca2-3)Galb1-4Glcb-Sp0	4457.39		741.058	9.0518	13.8399			12.122		9.53344	6.64386	6.64386					2.88959	0
HPA	574	GT1a	Neu5Aca2-8Neu5Aca2-3Galb1-3GalNAcb1-4(Neu5Aca2-3)Galb1-4Glc-Sp21	-4.98347		5.17375	5.44618	11.4178			6.64386		6.64386	6.64386	6.64386					0	0
HPA	611	GT1c	Galb1-3GalNAcb1-4(Neu5Aca2-8Neu5Aca2-8Neu5Aca2-3)Galb1-4Glcb-Sp21	5.6684		23.6153	24.237	18.0779			6.64386		6.64386	6.64386	6.64386					0	0
HPA	227	GT2	GalNAcb1-4(Neu5Aca2-8Neu5Aca2-8Neu5Aca2-3)Galb1-4Glcb-Sp0	5173.14		1310.53	135.989	15.4143			12.3368		10.3559	7.08734	6.64386					3.26859	0.443487
HPA	228	GT3	Neu5Aca2-8Neu5Aca2-8Neu5Aca2-3Galb1-4Glcb-Sp0	-0.73715		11.6549	4.27015	14.4913			6.64386		6.64386	6.64386	6.64386					0	0
HPA	118	iGb3	Gala1-3Galb1-4Glc-Sp10	-2.2991		6.3445	18.2902	6.17645			6.64386		6.64386	6.64386	6.64386					0	0
HPA	383	iLNO	Galb1-3GlcNacb1-3Galb1-4GlcNacb1-6(Galb1-3GlcNacb1-3)Galb1-4Glcb-Sp0	-4.16905		5.58952	4.0456	8.15825			6.64386		6.64386	6.64386	6.64386					0	0
HPA	198	isomaltose	Glca1-6Glca1-6Glcb-Sp8	1.00288		6.74245	14.1929	18.2494			6.64386		6.64386	6.64386	6.64386					0	0
HPA	27	Lac(3’3DiSu)	(3S)Galb1-4(6S)Glcb-Sp8	-1.38235		10.6883	9.7876	17.8726			6.64386		6.64386	6.64386	6.64386					0	0
HPA	26	Lac(3’6DiSu-)	(3S)Galb1-4(6S)Glcb-Sp0	2.64745		11.1317	14.3771	3.68443			6.64386		6.64386	6.64386	6.64386					0	0
HPA	25	Lac(3'su-)	(3S)Galb1-4Glcb-Sp8	-0.66595		17.0165	12.0523	4.1305			6.64386		6.64386	6.64386	6.64386					0	0
HPA	45	Lac(6’6Di-Su)	(6S)Galb1-4(6S)Glcb-Sp8	0.792575		9.6977	13.9619	4.77205			6.64386		6.64386	6.64386	6.64386					0	0
HPA	156	Lac(6Su)	Galb1-4(6S)Glcb-Sp0	-1.6775		3.2801	9.78065	11.825			6.64386		6.64386	6.64386	6.64386					0	0
HPA	157	Lac(6Su)	Galb1-4(6S)Glcb-Sp8	5.45112		11.6618	13.2828	6.38575			6.64386		6.64386	6.64386	6.64386					0	0
HPA	42	Lac(6'Su)	(6S)Galb1-4Glcb-Sp0	2.71918		9.87462	13.5526	13.0069			6.64386		6.64386	6.64386	6.64386					0	0
HPA	43	Lac(6'Su)	(6S)Galb1-4Glcb-Sp8	8.88015		7.06313	10.9977	0.56275			6.64386		6.64386	6.64386	6.64386					0	0
HPA	170	LacNAc	Galb1-4GlcNAcb-Sp8	-1.87382		9.26795	9.09263	6.94815			6.64386		6.64386	6.64386	6.64386					0	0
HPA	169	LacNAc	Galb1-4GlcNAcb-Sp0	0.733025		21.0348	15.7054	6.19717			6.64386		6.64386	6.64386	6.64386					0	0
HPA	161	LacNAc--	Galb1-4GlcNAcb1-3GalNAc-Sp14	2.2673		10.0853	19.8879	17.8544			6.64386		6.64386	6.64386	6.64386					0	0
HPA	304	LacNAc--	GlcNAcb1-6(Galb1-4GlcNAcb1-3)Galb1-4GlcNAc-Sp0	-2.7676		17.9632	4.63415	8.78255			6.64386		6.64386	6.64386	6.64386					0	0
HPA	305	LacNAc--	Galb1-4GlcNAca1-6Galb1-4GlcNAcb-Sp0	0.7404		5.72003	4.0687	6.23087			6.64386		6.64386	6.64386	6.64386					0	0
HPA	160	LacNAc--	Galb1-4GlcNAcb1-3GalNAca-Sp8	-2.00495		1.14655	6.9468	1.97067			6.64386		6.64386	6.64386	6.64386					0	0
HPA	306	LacNAc (1-6dimeric)	Galb1-4GlcNAcb1-6Galb1-4GlcNAcb-Sp0	-0.6982		2.10032	1.98645	3.21998			6.64386		6.64386	6.64386	6.64386					0	0
HPA	164	LacNAc (dimeric)	Galb1-4GlcNAcb1-3Galb1-4GlcNAcb-Sp0	-3.48795		7.74437	1.28493	8.03602			6.64386		6.64386	6.64386	6.64386					0	0
HPA	163	LacNAc (trimeric)	Galb1-4GlcNAcb1-3Galb1-4GlcNAcb1-3Galb1-4GlcNAcb-Sp0	-0.02365		8.62672	4.4643	10.4085			6.64386		6.64386	6.64386	6.64386					0	0
HPA	591	LacNAc dimeric (core 4)	Galb1-4GlcNAcb1-3Galb1-4GlcNAcb1-6(Galb1-3)GalNAca-Sp14	16.495		46.4386	36.7926	51.2688			6.64386		6.64386	6.64386	6.64386					0	0
HPA	590	LacNAc dimeric (core3)	Galb1-4GlcNAcb1-3Galb1-4GlcNAcb1-3GalNAca-Sp14	33.9718		52.0105	52.7105	59.3464			6.64386		6.64386	6.64386	6.64386					0	0
HPA	576	LacNAc ext 2 arms+F	Galb1-4GlcNAcb1-3Galb1-4GlcNAcb1-2Mana1-6(Galb1-4GlcNAcb1-3Galb1-4GlcNAcb1-2Mana1-3)Manb1-4GlcNAcb1-4(Fuca1-6)GlcNAcb-Sp24	2.82958		14.7505	26.4706	27.8659			6.64386		6.64386	6.64386	6.64386					0	0
HPA	582	LacNAc ext 2 arms+F	Galb1-4GlcNAcb1-3Galb1-4GlcNAcb1-3Galb1-4GlcNAcb1-3Galb1-4GlcNAcb1-3Galb1-4GlcNAcb1-2Mana1-6(Galb1-4GlcNAcb1-3Galb1-4GlcNAcb1-3Galb1-4GlcNAcb1-3Galb1-4GlcNAcb1-3Galb1-4GlcNAcb1-2Mana1-3)Manb1-4GlcNAcb1-4(Fuca1-6)GlcNAcb-Sp19	63.6548		72.2174	47.935	26.6946			6.64386		6.64386	6.64386	6.64386					0	0
HPA	580	LacNAc ext 2 arms+F	Galb1-4GlcNAcb1-3Galb1-4GlcNAcb1-3Galb1-4GlcNAcb1-3Galb1-4GlcNAcb1-2Mana1-6(Galb1-4GlcNAcb1-3Galb1-4GlcNAcb1-3Galb1-4GlcNAcb1-3Galb1-4GlcNAcb1-2Mana1-3)Manb1-4GlcNAcb1-4(Fuca1-6)GlcNAcb-Sp24	9.1906		30.5244	13.4302	4.97268			6.64386		6.64386	6.64386	6.64386					0	0
HPA	578	LacNAc ext 2 arms+F	Galb1-4GlcNAcb1-3Galb1-4GlcNAcb1-3Galb1-4GlcNAcb1-2Mana1-6(Galb1-4GlcNAcb1-3Galb1-4GlcNAcb1-3Galb1-4GlcNAcb1-2Mana1-3)Manb1-4GlcNAcb1-4(Fuca1-6)GlcNAcb-Sp24	16.4396		22.9921	8.79042	3.23255			6.64386		6.64386	6.64386	6.64386					0	0
HPA	542	LacNAc ext 2 arms2	Galb1-4GlcNAcb1-3Galb1-4GlcNAcb1-2Mana1-6(Galb1-4GlcNAcb1-3Galb1-4GlcNAcb1-2Mana1-3)Manb1-4GlcNAcb1-4GlcNAcb-Sp12	123.993		129.925	194.946	149.474			6.95412		7.02154	7.60693	7.22375					-0.585396	0.383179
HPA	543	LacNAc ext 2 arms2	Galb1-4GlcNAcb1-3Galb1-4GlcNAcb1-2Mana1-6(Galb1-4GlcNAcb1-3Galb1-4GlcNAcb1-2Mana1-3)Manb1-4GlcNAcb1-4GlcNAcb-Sp24	4.12957		22.5208	10.1456	3.8554			6.64386		6.64386	6.64386	6.64386					0	0
HPA	548	LacNAc ext 2 arms3	Galb1-4GlcNAcb1-3Galb1-4GlcNAcb1-3Galb1-4GlcNAcb1-2Mana1-6(Galb1-4GlcNAcb1-3Galb1-4GlcNAcb1-3Galb1-4GlcNAcb1-2Mana1-3)Manb1-4GlcNAcb1-4GlcNAcb-Sp12	77.7242		117.749	207.666	138.604			6.64386		6.87957	7.69812	7.11482					-0.818546	0.583295
HPA	549	LacNAc ext 2 arms3	Galb1-4GlcNAcb1-3Galb1-4GlcNAcb1-3Galb1-4GlcNAcb1-2Mana1-6(Galb1-4GlcNAcb1-3Galb1-4GlcNAcb1-3Galb1-4GlcNAcb1-2Mana1-3)Manb1-4GlcNAcb1-4GlcNAcb-Sp24	6.55205		21.3579	12.1279	12.3751			6.64386		6.64386	6.64386	6.64386					0	0
HPA	551	LacNAc ext 2 arms4	Galb1-4GlcNAcb1-3Galb1-4GlcNAcb1-3Galb1-4GlcNAcb1-3Galb1-4GlcNAcb1-2Mana1-6(Galb1-4GlcNAcb1-3Galb1-4GlcNAcb1-3Galb1-4GlcNAcb1-3Galb1-4GlcNAcb1-2Mana1-3)Manb1-4GlcNAcb1-4GlcNAcb-Sp25	33.7617		33.3132	29.0499	12.6985			6.64386		6.64386	6.64386	6.64386					0	0
HPA	566	LacNAc ext 2 arms5	Galb1-4GlcNAcb1-3Galb1-4GlcNAcb1-3Galb1-4GlcNAcb1-3Galb1-4GlcNAcb1-3Galb1-4GlcNAcb1-2Mana1-6(Galb1-4GlcNAcb1-3Galb1-4GlcNAcb1-3Galb1-4GlcNAcb1-3Galb1-4GlcNAcb1-3Galb1-4GlcNAcb1-2Mana1-3)Manb1-4GlcNAcb1-4GlcNAcb-Sp25	9.9086		17.185	29.9175	20.4027			6.64386		6.64386	6.64386	6.64386					0	0
HPA	569	LacNAc ext 2 arms6	Galb1-4GlcNAcb1-3Galb1-4GlcNAcb1-3Galb1-4GlcNAcb1-3Galb1-4GlcNAcb1-3Galb1-4GlcNAcb1-3Galb1-4GlcNAcb1-2Mana1-6(Galb1-4GlcNAcb1-3Galb1-4GlcNAcb1-3Galb1-4GlcNAcb1-3Galb1-4GlcNAcb1-3Galb1-4GlcNAcb1-3Galb1-4GlcNAcb1-2Mana1-3)Manb1-4GlcNAcb1-4GlcNAcb-Sp25	50.5577		51.9217	29.8846	8.35112			6.64386		6.64386	6.64386	6.64386					0	0
HPA	589	LacNAc ext 3 arms+F	Galb1-4GlcNAcb1-3Galb1-4GlcNAcb1-3Galb1-4GlcNAcb1-3Galb1-4GlcNAcb1-3Galb1-4GlcNAcb1-6(Galb1-4GlcNAcb1-3Galb1-4GlcNAcb1-3Galb1-4GlcNAcb1-3Galb1-4GlcNAcb1-3Galb1-4GlcNAb1-2)Mana1-6(Galb1-4GlcNAcb1-3Galb1-4GlcNAcb1-3Galb1-4GlcNAcb1-3Galb1-4GlcNAcb1-3Galb1-4G	80.1317		79.9799	50.0343	18.4997			6.64386		6.64386	6.64386	6.64386					0	0
HPA	583	LacNAc ext 3 arms+F	Galb1-4GlcNAcb1-3Galb1-4GlcNAcb1-6(Galb1-4GlcNAcb1-3Galb1-4GlcNAb1-2)Mana1-6(Galb1-4GlcNAcb1-3Galb1-4GlcNAcb1-2Mana1-3)Manb1-4GlcNAcb1-4(Fuca1-6)GlcNAcb-Sp24	5.9182		12.6343	11.7023	10.1303			6.64386		6.64386	6.64386	6.64386					0	0
HPA	587	LacNAc ext 3 arms+F	Galb1-4GlcNAcb1-3Galb1-4GlcNAcb1-3Galb1-4GlcNAcb1-3Galb1-4GlcNAcb1-6(Galb1-4GlcNAcb1-3Galb1-4GlcNAcb1-3Galb1-4GlcNAcb1-3Galb1-4GlcNAb1-2)Mana1-6(Galb1-4GlcNAcb1-3Galb1-4GlcNAcb1-3Galb1-4GlcNAcb1-3Galb1-4GlcNAcb1-2Mana1-3)Manb1-4GlcNAcb1-4(Fuca1-6)GlcNAcb-	0.86655		26.2903	19.3861	10.0464			6.64386		6.64386	6.64386	6.64386					0	0
HPA	585	LacNAc ext 3 arms+F	Galb1-4GlcNAcb1-3Galb1-4GlcNAcb1-3Galb1-4GlcNAcb1-6(Galb1-4GlcNAcb1-3Galb1-4GlcNAcb1-3Galb1-4GlcNAb1-2)Mana1-6(Galb1-4GlcNAcb1-3Galb1-4GlcNAcb1-3Galb1-4GlcNAcb1-2Mana1-3)Manb1-4GlcNAcb1-4(Fuca1-6)GlcNAcb-Sp24	21.0338		28.1754	11.8432	6.38662			6.64386		6.64386	6.64386	6.64386					0	0
HPA	560	LacNAc ext 3 arms2	Galb1-4GlcNAcb1-3Galb1-4GlcNAcb1-6(Galb1-4GlcNAcb1-3Galb1-4GlcNAcb1-2)Mana1-6(Galb1-4GlcNAcb1-3Galb1-4GlcNAcb1-2Mana1-3)Mana1-4GlcNAcb1-4GlcNAc-Sp24	66.6635		63.6621	45.6243	24.0589			6.64386		6.64386	6.64386	6.64386					0	0
HPA	35	LacNAc(3’6DiSu)	(3S)Galb1-4(6S)GlcNAcb-Sp8	-2.36702		9.21102	4.27042	7.92292			6.64386		6.64386	6.64386	6.64386					0	0
HPA	34	LacNAc(3’6DiSu)	(3S)Galb1-4(6S)GlcNAcb-Sp0	-3.3389		16.9645	14.1032	7.3433			6.64386		6.64386	6.64386	6.64386					0	0
HPA	22	LacNAc(3'6'6tri-su-)	6S(3S)Galb1-4(6S)GlcNAcb-Sp0	-3.08193		7.07125	8.42188	3.92603			6.64386		6.64386	6.64386	6.64386					0	0
HPA	23	LacNAc(3'6'di-su-)	6S(3S)Galb1-4GlcNAcb-Sp0	-3.2723		12.4745	5.9546	2.50365			6.64386		6.64386	6.64386	6.64386					0	0
HPA	37	LacNAc(3'Su)	(3S)Galb1-4GlcNAcb-Sp8	1.50037		5.38222	13.1036	4.3744			6.64386		6.64386	6.64386	6.64386					0	0
HPA	36	LacNAc(3'Su)	(3S)Galb1-4GlcNAcb-Sp0	0.782675		12.2859	15.9881	0.809575			6.64386		6.64386	6.64386	6.64386					0	0
HPA	39	LacNac(4'6'diSu)	(6S)(4S)Galb1-4GlcNAcb-Sp0	-2.32555		8.34883	9.3392	6.63523			6.64386		6.64386	6.64386	6.64386					0	0
HPA	40	LacNAc(4'Su)	(4S)Galb1-4GlcNAcb-Sp8	-2.49657		8.56522	6.80255	8.9423			6.64386		6.64386	6.64386	6.64386					0	0
HPA	44	LacNAc(6'Su)	(6S)Galb1-4GlcNAcb-Sp8	0.8359		14.0717	2.57145	8.42765			6.64386		6.64386	6.64386	6.64386					0	0
HPA	600	LacNAc-core1	Galb1-4GlcNAcb1-3Galb1-3GalNAca-Sp14	-8.5358		3.7292	-0.09735	1.0236			6.64386		6.64386	6.64386	6.64386					0	0
HPA	294	LacNAc-LeC	Galb1-4GlcNAcb1-3Galb1-3GlcNAcb-Sp0	-0.15305		11.014	2.98358	16.9756			6.64386		6.64386	6.64386	6.64386					0	0
HPA	162	LacNAc-LeX-LeX	Galb1-4GlcNAcb1-3Galb1-4(Fuca1-3)GlcNAcb1-3Galb1-4(Fuca1-3)GlcNAcb-Sp0	3.9581		5.48323	16.8895	8.92535			6.64386		6.64386	6.64386	6.64386					0	0
HPA	592	LacNAcs (core4)	Galb1-4GlcNAcb1-3Galb1-4GlcNAcb1-6(Galb1-4GlcNAcb1-3Galb1-4GlcNAcb1-3)GalNAca-Sp14	36.8333		75.7251	96.7526	80.0998			6.64386		6.64386	6.64386	6.64386					0	0
HPA	173	Lactose	Galb1-4Glcb-Sp8	-0.65505		15.8492	10.9652	17.6585			6.64386		6.64386	6.64386	6.64386					0	0
HPA	172	Lactose	Galb1-4Glcb-Sp0	6.31665		7.6539	6.95225	8.28525			6.64386		6.64386	6.64386	6.64386					0	0
HPA	564	LDN (dimeric)	GalNAcb1-4GlcNAcb1-3GalNAcb1-4GlcNAcb-Sp0	-7.8703		-1.32725	-1.21127	-6.16502			6.64386		6.64386	6.64386	6.64386					0	0
HPA	100	LDN, Lac-di-Nac,	GalNAcb1-4GlcNAcb-Sp8	0.450575		20.4339	9.6464	5.99032			6.64386		6.64386	6.64386	6.64386					0	0
HPA	99	LDN, Lac-di-Nac,	GalNAcb1-4GlcNAcb-Sp0	4.19748		9.30392	13.8201	2.31867			6.64386		6.64386	6.64386	6.64386					0	0
HPA	529	LDN-Man	GalNAcb1-4GlcNAcb1-2Mana-Sp0	-9.92385		3.1615	3.76277	9.95177			6.64386		6.64386	6.64386	6.64386					0	0
HPA	380	LDN--Man3	GalNAcb1-4GlcNAcb1-2Mana1-6(GalNAcb1-4GlcNAcb1-2Mana1-3)Manb1-4GlcNAcb1-4GlcNAc-Sp12	66.8074		60.0791	70.8991	74.9678			6.64386		6.64386	6.64386	6.64386					0	0
HPA	129	LeA	Galb1-3(Fuca1-4)GlcNAc-Sp0	2.42647		5.29148	13.7639	12.9861			6.64386		6.64386	6.64386	6.64386					0	0
HPA	130	LeA	Galb1-3(Fuca1-4)GlcNAc-Sp8	-4.27032		4.76438	10.6199	3.6804			6.64386		6.64386	6.64386	6.64386					0	0
HPA	131	LeA	Fuca1-4(Galb1-3)GlcNAcb-Sp8	-4.49408		8.05248	8.88675	3.12763			6.64386		6.64386	6.64386	6.64386					0	0
HPA	366	LeA--	Fuca1-4(Galb1-3)GlcNAcb1-2Mana1-6(Fuca1-4(Galb1-3)GlcNAcb1-2Mana1-3)Manb1-4GlcNAcb1-4(Fuca1-6)GlcNAcb-Sp22	32.3678		34.1445	18.8734	19.163			6.64386		6.64386	6.64386	6.64386					0	0
HPA	491	LeA--	Galb1-3(Fuca1-4)GlcNAcb1-6GalNAca-Sp14	-3.26872		2.6542	11.512	2.5559			6.64386		6.64386	6.64386	6.64386					0	0
HPA	534	LeA--	Fuca1-4(Galb1-3)GlcNAcb1-2 Mana-Sp0	15.1374		32.7117	4.02263	2.49095			6.64386		6.64386	6.64386	6.64386					0	0
HPA	28	LeA(3'su)	(3S)Galb1-3(Fuca1-4)GlcNAcb-Sp8	2.91298		10.205	19.4469	0.45595			6.64386		6.64386	6.64386	6.64386					0	0
HPA	278	LeA-LeA	Galb1-3(Fuca1-4)GlcNAcb1-3Galb1-3(Fuca1-4)GlcNAcb-Sp0	5.23645		9.9488	6.96502	6.3479			6.64386		6.64386	6.64386	6.64386					0	0
HPA	127	LeA-LeX	Galb1-3(Fuca1-4)GlcNAcb1-3Galb1-4(Fuca1-3)GlcNAcb-Sp0	-0.776725		7.66243	2.29415	8.29013			6.64386		6.64386	6.64386	6.64386					0	0
HPA	61	LeB	Fuca1-2Galb1-3(Fuca1-4)GlcNAcb-Sp8	6.08677		3.03173	5.92987	6.84802			6.64386		6.64386	6.64386	6.64386					0	0
[truncated: 3,910 more rows]

## Sheet: Pairwise Comparisons
									Lectin			ConA	ConA	ConA	ConA	ConA	ConA	ConA	ConA	ConA	ConA	ConA	ConA		WGA	WGA	WGA	WGA	WGA	WGA	WGA	WGA	WGA	WGA	WGA	WGA		SNA	SNA	SNA	SNA	SNA	SNA	SNA	SNA	SNA	SNA	SNA	SNA
[truncated: 142 more rows]

[truncated: 5 more sheets: Sortable Pairwise Comparisons, Full Neoglycoprotein Array Data, NGP array consistency, NGP array-density, CFG v NGP top 101 differences]
